# Supplementary material
Source: publisher figshare collection journal article supplement (https://gsapubs.figshare.com/ndownloader/files/22411200)
Supplement: Supplementary file 1 [file 22411200]

## Sheet: U-Pb Dates - Great Falls
University of Calgary, Centre for Pure and Applied Tectonics and Thermochronology
Upper Sandstone, Flood Mb ( 47.386600°, -111.388053°)		f206c	207Pb CPS	206Pb CPS	U (ppm)1	U/Th	206Pb/204Pb	1σ %	Data for Tera-Wasserburg plot2				208Pb/206Pb	2σx (%)	Data for Wetherill plot2					208Pb/232Th	2σx (%)	Dates									208Pb/232Th	2σx (ABS)	2σtotal (ABS)	Prob. Conc. (%)	% conc3	Comments	Accepted Dates4
Sample	Spot								238U/206Pb	2σx (%)	207Pb/206Pb	2σx (%)			207Pb/235Pb	2σx (%)	206Pb/238U	2σx (%)	Rho			207Pb/206Pb	2σx (ABS)	2σtotal (ABS)	206Pb/238U	2σx (ABS)	2σtotal (ABS)	207Pb/235Pb	2σx (ABS)	2σtotal (ABS)							Date (Ma)	2σx (ABS)	2σx (%)	2σtotal (ABS)	2σtotal (%)
UK058	UK058_101	NA	659	14420	34	0.0452971	NA	NA	62.6174	2.01422	0.0496	7.76078	NA	NA	0.109216	8.0179	0.01597	2.01422	0.12144	NA	NA	NA	NA	NA	102.136	2.04102	2.4577	105.248	8.01625	8.18538	NA	NA	NA	43.8754	NA		102.136	2.04102	1.99834	2.4577	2.40385
UK058	UK058_174	NA	297	6500	8.39	0.044042	NA	NA	62.461	2.10697	0.0497	9.05635	NA	NA	0.109711	9.29821	0.01601	2.10697	0.09658	NA	NA	NA	NA	NA	102.39	2.14027	2.54255	105.701	9.33428	9.48111	NA	NA	NA	48.0522	NA		102.39	2.14027	2.09032	2.54255	2.4808
UK058	UK058_204	NA	108	2193	5.14	0.0541053	NA	NA	61.5006	2.22981	0.0535	12.2755	NA	NA	0.119943	12.4764	0.01626	2.22981	-0.051721	NA	NA	NA	NA	NA	103.976	2.29986	2.68914	115.021	13.5683	13.6872	NA	NA	NA	11.3259	NA		103.976	2.29986	2.21192	2.68914	2.57663
UK058	UK058_272	NA	389	8090	23.1	0.0428571	NA	NA	60.6428	2.18115	0.0549	9.75885	NA	NA	0.124823	9.99963	0.01649	2.18115	0.036743	NA	NA	NA	NA	NA	105.434	2.28098	2.68317	119.435	11.2679	11.4213	NA	NA	NA	1.47864	NA		105.434	2.28098	2.16341	2.68317	2.53412
UK058	UK058_257	NA	508	11900	20.7	0.046	NA	NA	60.2047	2.36531	0.0468	9.54563	NA	NA	0.107181	9.83432	0.01661	2.36531	0.64554	NA	NA	NA	NA	NA	106.195	2.49127	2.86909	103.383	9.66686	9.80291	NA	NA	NA	49.6185	NA		106.195	2.49127	2.34593	2.86909	2.69199
UK058	UK058_131	NA	123	2660	3.64	0.0465473	NA	NA	59.988	2.13831	0.0525	11.264	NA	NA	0.120669	11.4652	0.01667	2.13831	0.18571	NA	NA	NA	NA	NA	106.576	2.26019	2.67359	115.678	12.5358	12.6658	NA	NA	NA	14.1182	NA		106.576	2.26019	2.12073	2.67359	2.50891
UK058	UK058_213	NA	212	4720	8.83	0.0440839	NA	NA	59.8802	2.20086	0.0491	9.89875	NA	NA	0.113057	10.1405	0.0167	2.20086	-0.084297	NA	NA	NA	NA	NA	106.766	2.33042	2.73454	108.758	10.4589	10.5974	NA	NA	NA	71.5053	NA		106.766	2.33042	2.18273	2.73454	2.55825
UK058	UK058_172	NA	199	4660	12.1	0.0444853	NA	NA	59.7372	2.31286	0.0506	10.8908	NA	NA	0.11679	11.1337	0.01674	2.31286	-0.045465	NA	NA	NA	NA	NA	107.02	2.45479	2.84297	112.158	11.8229	11.9529	NA	NA	NA	40.0021	NA		107.02	2.45479	2.29377	2.84297	2.65024
UK058	UK058_191	NA	585	13170	7.3	0.0561538	NA	NA	59.6659	2.04932	0.0501	8.29339	NA	NA	0.115775	8.54284	0.01676	2.04932	0.12657	NA	NA	NA	NA	NA	107.147	2.17763	2.60834	111.234	9.00078	9.16827	NA	NA	NA	36.3993	NA		107.147	2.17763	2.03239	2.60834	2.4318
UK058	UK058_138	NA	170	4000	10.44	0.05	NA	NA	59.5238	2.21089	0.0461	10.5758	NA	NA	0.106785	10.8044	0.0168	2.21089	-0.13043	NA	NA	NA	NA	NA	107.4	2.35483	2.75976	103.02	10.5851	10.7087	NA	NA	NA	43.081	NA		107.4	2.35483	2.19258	2.75976	2.57709
UK058	UK058_203	NA	245	5460	6.91	0.0515287	NA	NA	59.453	2.12273	0.0486	9.69176	NA	NA	0.11271	9.9215	0.01682	2.12273	-0.024648	NA	NA	NA	NA	NA	107.527	2.26357	2.68322	108.442	10.2048	10.3459	NA	NA	NA	86.1826	NA		107.527	2.26357	2.10512	2.68322	2.4943
UK058	UK058_215	NA	220	4960	3.88	0.0559078	NA	NA	58.9623	2.15483	0.0484	10.2302	NA	NA	0.113181	10.4547	0.01696	2.15483	-0.079421	NA	NA	NA	NA	NA	108.414	2.31662	2.73436	108.871	10.7936	10.9281	NA	NA	NA	93.5154	NA		108.414	2.31662	2.13682	2.73436	2.52152
UK058	UK058_94	NA	320	7560	13.1	0.0486989	NA	NA	58.8582	2.03639	0.0475	8.97578	NA	NA	0.111273	9.20388	0.01699	2.03639	0.17358	NA	NA	NA	NA	NA	108.605	2.19308	2.63192	107.129	9.35795	9.50817	NA	NA	NA	74.9058	NA		108.605	2.19308	2.01933	2.63192	2.42388
UK058	UK058_260	NA	231	4510	8.88	0.0481562	NA	NA	58.6166	2.10588	0.0542	9.67609	NA	NA	0.127491	9.9026	0.01706	2.10588	-0.054132	NA	NA	NA	NA	NA	109.048	2.27711	2.70551	121.841	11.3701	11.5279	NA	NA	NA	2.99012	NA		109.048	2.27711	2.08816	2.70551	2.46733
UK058	UK058_270	NA	274	6310	12.43	0.046037	NA	NA	58.3431	2.10413	0.0482	9.74235	NA	NA	0.113909	9.96698	0.01714	2.10413	0.17452	NA	NA	NA	NA	NA	109.555	2.28571	2.71638	109.535	10.3495	10.4913	NA	NA	NA	99.6849	NA		109.555	2.28571	2.08635	2.71638	2.47947
UK058	UK058_244	NA	83	2220	2.43	0.0543624	NA	NA	58.1395	2.29333	0.0423	12.9155	NA	NA	0.100316	13.1175	0.0172	2.29333	0.055258	NA	NA	NA	NA	NA	109.936	2.49981	2.90141	97.068	12.1438	12.2401	NA	NA	NA	3.47419	NA		109.936	2.49981	2.27389	2.90141	2.64883
UK058	UK058_51	NA	88	2090	3.45	0.0454545	NA	NA	58.1058	2.36717	0.0487	12.8528	NA	NA	0.115561	13.0689	0.01721	2.36717	0.05249	NA	NA	NA	NA	NA	109.999	2.58177	2.97274	111.04	13.7472	13.8571	NA	NA	NA	88.0627	NA		109.999	2.58177	2.34709	2.97274	2.70188
UK058	UK058_275	NA	1037	22430	12.93	0.0487925	NA	NA	57.7701	1.99891	0.0503	7.3401	NA	NA	0.120051	7.60741	0.01731	1.99891	-0.0067514	NA	NA	NA	NA	NA	110.633	2.19258	2.64649	115.118	8.27952	8.47334	NA	NA	NA	29.6605	NA		110.633	2.19258	1.98185	2.64649	2.3857
UK058	UK058_102	NA	149	3180	3.66	0.0565688	NA	NA	57.6369	2.34548	0.0505	11.4341	NA	NA	0.120807	11.6722	0.01735	2.34548	0.0061992	NA	NA	NA	NA	NA	110.886	2.57857	2.97582	115.803	12.7751	12.903	NA	NA	NA	45.0933	NA		110.886	2.57857	2.32542	2.97582	2.67918
UK058	UK058_21	NA	1218	26300	7.4	0.05	NA	NA	56.6893	2.0361	0.0506	7.27846	NA	NA	0.123069	7.55789	0.01764	2.0361	0.52205	NA	NA	NA	NA	NA	112.723	2.27521	2.73059	117.851	8.40977	8.6092	NA	NA	NA	17.153	NA		112.723	2.27521	2.0184	2.73059	2.43192
UK058	UK058_70	NA	136	2920	5.28	0.055755	NA	NA	55.1876	2.5229	0.0494	11.0837	NA	NA	0.12342	11.3672	0.01812	2.5229	-0.073966	NA	NA	NA	NA	NA	115.763	2.89453	3.28349	118.168	12.6809	12.8147	NA	NA	NA	71.6155	NA		115.763	2.89453	2.50038	3.28349	2.83266
UK058	UK058_78	NA	148	3340	10.4	0.0585586	NA	NA	54.7645	2.51465	0.048	12.3347	NA	NA	0.120849	12.5884	0.01826	2.51465	0.16615	NA	NA	NA	NA	NA	116.65	2.90696	3.3	115.841	13.7823	13.9011	NA	NA	NA	90.5378	NA		116.65	2.90696	2.49204	3.3	2.82918
UK058	UK058_141	NA	312	7280	6.45	0.0609065	NA	NA	54.1126	2.10761	0.0477	9.19396	NA	NA	0.121541	9.43244	0.01848	2.10761	0.16487	NA	NA	NA	NA	NA	118.042	2.46523	2.92832	116.468	10.3795	10.5382	NA	NA	NA	75.8835	NA		118.042	2.46523	2.08843	2.92832	2.48133
UK058	UK058_253	NA	84	1840	1.64	0.0527331	NA	NA	54.0833	2.33874	0.0511	12.3165	NA	NA	0.130274	12.5365	0.01849	2.33874	0.23845	NA	NA	NA	NA	NA	118.106	2.73703	3.16097	124.344	14.6728	14.8002	NA	NA	NA	38.3373	NA		118.106	2.73703	2.31744	3.16097	2.67786
UK058	UK058_72	NA	765	16900	18.1	0.0545181	NA	NA	53.7634	1.9939	0.0478	7.67361	NA	NA	0.122586	7.92842	0.0186	1.9939	-0.20453	NA	NA	NA	NA	NA	118.802	2.34709	2.83522	117.414	8.79123	8.98088	NA	NA	NA	77.1249	NA		118.802	2.34709	1.97564	2.83522	2.38949
UK058	UK058_115	NA	652	13780	13.6	0.048433	NA	NA	53.5045	2.10338	0.0519	8.08089	NA	NA	0.133745	8.35015	0.01869	2.10338	0.25354	NA	NA	NA	NA	NA	119.371	2.48773	2.95678	127.457	10.0023	10.1971	NA	NA	NA	9.59499	NA		119.371	2.48773	2.08402	2.95678	2.47726
UK058	UK058_267	NA	104	2170	1.45	0.0564202	NA	NA	52.1376	2.50897	0.0511	11.8906	NA	NA	0.135136	12.1524	0.01918	2.50897	-0.081499	NA	NA	NA	NA	NA	122.471	3.04377	3.45707	128.702	14.6908	14.8265	NA	NA	NA	41.4896	NA		122.471	3.04377	2.48529	3.45707	2.81486
UK058	UK058_13	NA	146	2750	3.67	0.0675875	NA	NA	50.3778	2.1927	0.0536	11.1151	NA	NA	0.146699	11.3293	0.01985	2.1927	0.059612	NA	NA	NA	NA	NA	126.708	2.7512	3.23158	138.993	14.7177	14.8741	NA	NA	NA	9.90372	NA		126.708	2.7512	2.17129	3.23158	2.54475
UK058	UK058_266	NA	61	1334	0.83	0.0585331	NA	NA	50.1505	2.64758	0.051	14.6232	NA	NA	0.140216	14.861	0.01994	2.64758	0.073735	NA	NA	NA	NA	NA	127.277	3.3367	3.74609	133.236	18.5582	18.673	NA	NA	NA	52.3064	NA		127.277	3.3367	2.62161	3.74609	2.94069
UK058	UK058_187	NA	149	3040	3.53	0.0743158	NA	NA	42.0168	2.14342	0.0529	10.4582	NA	NA	0.173594	10.6756	0.0238	2.14342	0.009496	NA	NA	NA	NA	NA	151.627	3.21209	3.79702	162.533	16.0352	16.2269	NA	NA	NA	18.3641	NA		151.627	3.21209	2.11841	3.79702	2.49765
UK058	UK058_177	NA	269	6050	13	0.0747126	NA	NA	41.9111	2.08618	0.0488	9.50462	NA	NA	0.160543	9.73087	0.02386	2.08618	0.17985	NA	NA	NA	NA	NA	152.005	3.13401	3.7339	151.178	13.669	13.8655	NA	NA	NA	90.2208	NA		152.005	3.13401	2.06178	3.7339	2.45659
UK058	UK058_19	NA	1006	22640	44.5	0.0676292	NA	NA	41.5455	1.99901	0.0489	7.44086	NA	NA	0.162288	7.7047	0.02407	1.99901	0.13052	NA	NA	NA	NA	NA	153.327	3.02886	3.65584	152.704	10.9238	11.1732	NA	NA	NA	90.9314	NA		153.327	3.02886	1.97542	3.65584	2.38473
UK058	UK058_36	NA	240	5490	9.89	0.0764297	NA	NA	41.5455	2.12203	0.049	9.65022	NA	NA	0.16262	9.88078	0.02407	2.12203	0.21069	NA	NA	NA	NA	NA	153.327	3.21526	3.8117	152.994	14.0341	14.2298	NA	NA	NA	96.1228	NA		153.327	3.21526	2.09699	3.8117	2.48601
UK058	UK058_238	NA	191	3830	7.92	0.069352	NA	NA	41.5455	2.22815	0.0514	10.4257	NA	NA	0.170585	10.6611	0.02407	2.22815	0.0054495	NA	NA	NA	NA	NA	153.327	3.37605	3.94827	159.926	15.7763	15.9654	NA	NA	NA	41.4148	NA		153.327	3.37605	2.20186	3.94827	2.57037
UK058	UK058_216	NA	167	3790	5.39	0.0737346	NA	NA	41.0004	2.29858	0.0505	11.328	NA	NA	0.169826	11.5588	0.02439	2.29858	-0.11774	NA	NA	NA	NA	NA	155.341	3.52797	4.09234	159.268	17.0399	17.2139	NA	NA	NA	65.9638	NA		155.341	3.52797	2.27111	4.09234	2.63034
UK058	UK058_180	NA	285	6810	12.56	0.0679654	NA	NA	40.5844	2.04175	0.0468	9.40447	NA	NA	0.158997	9.62355	0.02464	2.04175	-0.050036	NA	NA	NA	NA	NA	156.914	3.16512	3.79541	149.824	13.4059	13.6029	NA	NA	NA	30.7127	NA		156.914	3.16512	2.0171	3.79541	2.42569
UK058	UK058_277	NA	309	6720	12	0.0659341	NA	NA	40.568	2.08992	0.0515	9.4257	NA	NA	0.175035	9.65461	0.02465	2.08992	-0.032462	NA	NA	NA	NA	NA	156.977	3.24108	3.85943	163.779	14.6039	14.8171	NA	NA	NA	36.7803	NA		156.977	3.24108	2.06468	3.85943	2.45299
UK058	UK058_218	NA	244	5490	5.9	0.0727497	NA	NA	40.5351	2.12801	0.0493	10.2269	NA	NA	0.167694	10.446	0.02467	2.12801	0.068952	NA	NA	NA	NA	NA	157.103	3.30277	3.91227	157.416	15.2335	15.4237	NA	NA	NA	96.7541	NA		157.103	3.30277	2.10229	3.91227	2.4901
UK058	UK058_80	NA	165	4120	8.27	0.0786122	NA	NA	40.5022	2.15216	0.0447	10.9272	NA	NA	0.15217	11.1372	0.02469	2.15216	0.13564	NA	NA	NA	NA	NA	157.229	3.34289	3.94708	143.826	14.9365	15.1007	NA	NA	NA	6.93988	NA		157.229	3.34289	2.12613	3.94708	2.51485
UK058	UK058_149	NA	374	8050	11.5	0.0618612	NA	NA	40.3877	2.35985	0.0506	9.61467	NA	NA	0.172744	9.90003	0.02476	2.35985	0.26935	NA	NA	NA	NA	NA	157.669	3.67562	4.23546	161.797	14.808	15.0137	NA	NA	NA	56.3492	NA		157.669	3.67562	2.33122	4.23546	2.68671
UK058	UK058_152	NA	684	14700	27.4	0.0721053	NA	NA	40.2901	2.0463	0.0508	8.13425	NA	NA	0.173847	8.38769	0.02482	2.0463	0.084865	NA	NA	NA	NA	NA	158.047	3.19478	3.82838	162.752	12.6139	12.8573	NA	NA	NA	46.1279	NA		158.047	3.19478	2.02141	3.82838	2.41933
UK058	UK058_129	NA	247	6030	8.9	0.0622378	NA	NA	40.2253	2.17428	0.0459	9.49471	NA	NA	0.157331	9.74049	0.02486	2.17428	-0.041836	NA	NA	NA	NA	NA	158.298	3.39993	4.00293	148.364	13.446	13.6389	NA	NA	NA	15.4283	NA		158.298	3.39993	2.1478	4.00293	2.5398
UK058	UK058_171	NA	457	9350	17.49	0.0719753	NA	NA	40.2253	2.07982	0.0544	8.61291	NA	NA	0.186467	8.86046	0.02486	2.07982	0.13314	NA	NA	NA	NA	NA	158.298	3.25222	3.87826	173.61	14.1404	14.3851	NA	NA	NA	3.08276	NA		158.298	3.25222	2.05449	3.87826	2.44487
UK058	UK058_108	NA	389	7500	12.2	0.0748466	NA	NA	40.1606	2.13211	0.0542	8.83938	NA	NA	0.18608	9.09289	0.0249	2.13211	0.14746	NA	NA	NA	NA	NA	158.55	3.33922	3.95327	173.279	14.486	14.7242	NA	NA	NA	4.18767	NA		158.55	3.33922	2.1061	3.95327	2.4891
UK058	UK058_95	NA	374	7870	10.47	0.0721074	NA	NA	39.8724	1.98704	0.0527	8.92317	NA	NA	0.182238	9.14174	0.02508	1.98704	0.061719	NA	NA	NA	NA	NA	159.682	3.13397	3.78987	169.985	14.3094	14.5422	NA	NA	NA	15.604	NA		159.682	3.13397	1.96263	3.78987	2.36832
UK058	UK058_81	NA	404	8920	16.79	0.075123	NA	NA	39.8406	2.00236	0.0502	8.67077	NA	NA	0.173732	8.89897	0.0251	2.00236	-0.072427	NA	NA	NA	NA	NA	159.808	3.16059	3.81283	162.652	13.3753	13.6049	NA	NA	NA	68.4071	NA		159.808	3.16059	1.97774	3.81283	2.38306
UK058	UK058_82	NA	343	7870	12.57	0.0800127	NA	NA	39.8089	2.05607	0.0473	9.20655	NA	NA	0.163826	9.43334	0.02512	2.05607	0.13524	NA	NA	NA	NA	NA	159.933	3.24788	3.88641	154.046	13.4839	13.69	NA	NA	NA	37.9512	NA		159.933	3.24788	2.03077	3.88641	2.43235
UK058	UK058_69	NA	623	14150	32.2	0.0733485	NA	NA	39.7931	2.03678	0.0492	8.11775	NA	NA	0.170474	8.36937	0.02513	2.03678	-0.14756	NA	NA	NA	NA	NA	159.996	3.21867	3.86249	159.83	12.3777	12.6176	NA	NA	NA	98.0008	NA		159.996	3.21867	2.01172	3.86249	2.41434
UK058	UK058_201	NA	233	4880	9.8	0.0748092	NA	NA	39.7772	2.13599	0.0494	10.2135	NA	NA	0.171235	10.4345	0.02514	2.13599	0.28162	NA	NA	NA	NA	NA	160.059	3.37675	3.99562	160.491	15.4912	15.685	NA	NA	NA	95.3834	NA		160.059	3.37675	2.10969	3.99562	2.49644
UK058	UK058_175	NA	174	3940	5.15	0.0820064	NA	NA	39.604	2.20978	0.0506	10.3775	NA	NA	0.176162	10.6102	0.02525	2.20978	0.072426	NA	NA	NA	NA	NA	160.751	3.50832	4.11216	164.753	16.1374	16.3327	NA	NA	NA	62.3245	NA		160.751	3.50832	2.18246	4.11216	2.55613
UK058	UK058_283	NA	360	7660	8.23	0.0698049	NA	NA	39.5883	2.06109	0.0527	8.92292	NA	NA	0.183546	9.15787	0.02526	2.06109	-0.014064	NA	NA	NA	NA	NA	160.814	3.27352	3.91421	171.107	14.4216	14.6554	NA	NA	NA	16.7068	NA		160.814	3.27352	2.0356	3.91421	2.42608
UK058	UK058_224	NA	203	4140	7.19	0.079185	NA	NA	39.557	2.25481	0.053	10.1868	NA	NA	0.184737	10.4334	0.02528	2.25481	0.15509	NA	NA	NA	NA	NA	160.94	3.58395	4.17815	172.129	16.5206	16.7273	NA	NA	NA	17.3423	NA		160.94	3.58395	2.22689	4.17815	2.59374
UK058	UK058_284	NA	556	11830	12.54	0.0638493	NA	NA	39.5101	2.01732	0.0512	8.20976	NA	NA	0.178675	8.45397	0.02531	2.01732	-0.026814	NA	NA	NA	NA	NA	161.128	3.21018	3.8637	166.92	13.0132	13.2604	NA	NA	NA	39.1588	NA		161.128	3.21018	1.99232	3.8637	2.39254
UK058	UK058_181	NA	417	9110	12.06	0.0789784	NA	NA	39.4945	2.0411	0.0491	8.63532	NA	NA	0.171414	8.87327	0.02532	2.0411	-0.025471	NA	NA	NA	NA	NA	161.191	3.24928	3.8967	160.645	13.1848	13.4124	NA	NA	NA	93.6306	NA		161.191	3.24928	2.01579	3.8967	2.41795
UK058	UK058_139	NA	825	19000	30.9	0.0703872	NA	NA	39.4633	1.99544	0.0486	7.5934	NA	NA	0.169803	7.85121	0.02534	1.99544	0.036267	NA	NA	NA	NA	NA	161.317	3.17904	3.83926	159.248	11.5722	11.8268	NA	NA	NA	72.7533	NA		161.317	3.17904	1.97068	3.83926	2.38185
UK058	UK058_248	NA	472	10630	16.5	0.0714286	NA	NA	39.4322	2.05339	0.0489	8.45185	NA	NA	0.170986	8.69772	0.02536	2.05339	0.33529	NA	NA	NA	NA	NA	161.443	3.27389	3.91907	160.274	12.8963	13.1279	NA	NA	NA	84.7913	NA		161.443	3.27389	2.0279	3.91907	2.42713
UK058	UK058_254	NA	249	5530	6.37	0.0702315	NA	NA	39.4166	2.03445	0.0517	9.24539	NA	NA	0.180847	9.46659	0.02537	2.03445	0.065342	NA	NA	NA	NA	NA	161.505	3.24493	3.89537	168.789	14.7222	14.9457	NA	NA	NA	32.8724	NA		161.505	3.24493	2.00918	3.89537	2.40832
UK058	UK058_85	NA	427	9180	12.57	0.076228	NA	NA	39.4011	2.07316	0.0499	8.45578	NA	NA	0.17462	8.70622	0.02538	2.07316	-0.085802	NA	NA	NA	NA	NA	161.568	3.30795	3.94847	163.42	13.1426	13.3781	NA	NA	NA	78.8902	NA		161.568	3.30795	2.0474	3.94847	2.4417
UK058	UK058_62	NA	449	9750	15.89	0.0723588	NA	NA	39.3391	2.01083	0.0516	8.4994	NA	NA	0.180853	8.73403	0.02542	2.01083	-0.1125	NA	NA	NA	NA	NA	161.82	3.21341	3.87146	168.795	13.5832	13.8251	NA	NA	NA	33.0893	NA		161.82	3.21341	1.9858	3.87146	2.38485
UK058	UK058_219	NA	702	16190	25.8	0.0793846	NA	NA	39.2003	2.00472	0.0493	7.90734	NA	NA	0.173404	8.15751	0.02551	2.00472	0.31703	NA	NA	NA	NA	NA	162.385	3.21472	3.8767	162.369	12.2411	12.4907	NA	NA	NA	99.7689	NA		162.385	3.21472	1.97968	3.8767	2.38734
UK058	UK058_45	NA	728	16420	26.1	0.0707317	NA	NA	39.1389	2.01535	0.0508	7.7579	NA	NA	0.17896	8.0154	0.02555	2.01535	0.14657	NA	NA	NA	NA	NA	162.637	3.2367	3.8968	167.165	12.3547	12.6156	NA	NA	NA	46.2614	NA		162.637	3.2367	1.99014	3.8968	2.394
UK058	UK058_24	NA	978	21220	49	0.0728083	NA	NA	39.1083	1.9582	0.0505	7.5281	NA	NA	0.178042	7.77861	0.02557	1.9582	0.017595	NA	NA	NA	NA	NA	162.763	3.14731	3.82381	166.375	11.9375	12.205	NA	NA	NA	55.733	NA		162.763	3.14731	1.93368	3.82381	2.34615
UK058	UK058_263	NA	473	9540	19.5	0.0696429	NA	NA	39.0168	2.0701	0.0543	8.48293	NA	NA	0.191889	8.73187	0.02563	2.0701	-0.022067	NA	NA	NA	NA	NA	163.14	3.33479	3.98226	178.24	14.2751	14.5295	NA	NA	NA	4.16818	NA		163.14	3.33479	2.04413	3.98226	2.42864
UK058	UK058_223	NA	682	15500	23.5	0.0707831	NA	NA	39.0016	2.03793	0.0491	7.84504	NA	NA	0.17358	8.10542	0.02564	2.03793	0.20239	NA	NA	NA	NA	NA	163.203	3.2842	3.94046	162.521	12.1735	12.4249	NA	NA	NA	90.9203	NA		163.203	3.2842	2.01235	3.94046	2.41465
UK058	UK058_231	NA	426	9690	11.89	0.0779161	NA	NA	39.0016	2.02601	0.0483	8.49474	NA	NA	0.170752	8.73301	0.02564	2.02601	0.15243	NA	NA	NA	NA	NA	163.203	3.265	3.92446	160.072	12.9336	13.164	NA	NA	NA	62.5443	NA		163.203	3.265	2.00058	3.92446	2.40585
UK058	UK058_199	NA	402	9120	6.6	0.0804878	NA	NA	38.9712	1.99335	0.0461	8.80317	NA	NA	0.163102	9.02603	0.02566	1.99335	0.13395	NA	NA	NA	NA	NA	163.328	3.2148	3.88373	153.415	12.8526	13.0671	NA	NA	NA	12.0347	NA		163.328	3.2148	1.96831	3.88373	2.38219
UK058	UK058_155	NA	52	1069	1.17	0.0763708	NA	NA	38.9105	2.69999	0.056	14.6743	NA	NA	0.198437	14.9206	0.0257	2.69999	-0.099762	NA	NA	NA	NA	NA	163.58	4.36107	4.87665	183.803	25.0907	25.2447	NA	NA	NA	12.1554	NA		163.58	4.36107	2.66602	4.87665	2.96517
UK058	UK058_114	NA	458	10170	22.2	0.0798561	NA	NA	38.85	2.07552	0.0523	8.4637	NA	NA	0.185614	8.71447	0.02574	2.07552	0.017433	NA	NA	NA	NA	NA	163.831	3.35751	4.00627	172.88	13.8537	14.1015	NA	NA	NA	20.4191	NA		163.831	3.35751	2.04937	4.00627	2.43846
UK058	UK058_184	NA	277	5950	14	0.0732984	NA	NA	38.7747	2.09578	0.0511	9.50494	NA	NA	0.181708	9.73325	0.02579	2.09578	-0.068019	NA	NA	NA	NA	NA	164.145	3.39669	4.04141	169.529	15.1979	15.4163	NA	NA	NA	49.6458	NA		164.145	3.39669	2.06932	4.04141	2.45726
UK058	UK058_205	NA	743	16420	32.6	0.0789346	NA	NA	38.7447	1.99741	0.0481	7.78423	NA	NA	0.171173	8.03641	0.02581	1.99741	0.42622	NA	NA	NA	NA	NA	164.271	3.23971	3.91132	160.436	11.9268	12.1773	NA	NA	NA	48.2546	NA		164.271	3.23971	1.97217	3.91132	2.37826
UK058	UK058_12	NA	224	5090	10.97	0.081622	NA	NA	38.5951	2.10852	0.0492	9.54582	NA	NA	0.175766	9.77591	0.02591	2.10852	0.013291	NA	NA	NA	NA	NA	164.899	3.43284	4.07718	164.41	14.8399	15.0513	NA	NA	NA	94.8626	NA		164.899	3.43284	2.08178	4.07718	2.47288
UK058	UK058_151	NA	523	12310	17.24	0.0790826	NA	NA	38.5654	2.04733	0.0463	8.20941	NA	NA	0.165533	8.46085	0.02593	2.04733	0.37494	NA	NA	NA	NA	NA	165.025	3.33573	3.99667	155.535	12.2018	12.4333	NA	NA	NA	9.36663	NA		165.025	3.33573	2.02134	3.99667	2.41751
UK058	UK058_247	NA	548	12130	12.2	0.0723177	NA	NA	38.5356	1.99151	0.0497	8.40093	NA	NA	0.177826	8.63375	0.02595	1.99151	0.36375	NA	NA	NA	NA	NA	165.151	3.24722	3.92404	166.188	13.2363	13.4776	NA	NA	NA	86.7503	NA		165.151	3.24722	1.96622	3.92404	2.37653
UK058	UK058_66	NA	320	7040	5.28	0.0786885	NA	NA	38.506	2.18598	0.0509	8.94769	NA	NA	0.18226	9.21085	0.02597	2.18598	0.25665	NA	NA	NA	NA	NA	165.276	3.56699	4.19337	170.003	14.4191	14.6502	NA	NA	NA	49.8538	NA		165.276	3.56699	2.1582	4.19337	2.53738
UK058	UK058_236	NA	1080	23600	38.9	0.0729831	NA	NA	38.4763	2.05296	0.0507	7.40903	NA	NA	0.181684	7.68819	0.02599	2.05296	0.22863	NA	NA	NA	NA	NA	165.402	3.35245	4.01337	169.508	12.003	12.2782	NA	NA	NA	48.3616	NA		165.402	3.35245	2.02685	4.01337	2.42556
UK058	UK058_37	NA	860	19220	37.8	0.0784232	NA	NA	38.432	1.98627	0.0487	7.64231	NA	NA	0.174718	7.89621	0.02602	1.98627	-0.053107	NA	NA	NA	NA	NA	165.591	3.2472	3.92727	163.505	11.9254	12.1847	NA	NA	NA	73.8904	NA		165.591	3.2472	1.96098	3.92727	2.37408
UK058	UK058_288	NA	253	4830	8.08	0.0672773	NA	NA	38.432	2.1767	0.0549	9.7561	NA	NA	0.196961	9.99597	0.02602	2.1767	0.11813	NA	NA	NA	NA	NA	165.591	3.5585	4.18833	182.552	16.703	16.9306	NA	NA	NA	4.33956	NA		165.591	3.5585	2.14898	4.18833	2.5243
UK058	UK058_127	NA	640	14040	44.1	0.0751278	NA	NA	38.3877	2.00088	0.0506	8.09439	NA	NA	0.181744	8.33803	0.02605	2.00088	0.082401	NA	NA	NA	NA	NA	165.779	3.27476	3.95148	169.56	13.0213	13.2755	NA	NA	NA	56.6277	NA		165.779	3.27476	1.97537	3.95148	2.38134
UK058	UK058_118	NA	74	1960	3.23	0.0674322	NA	NA	38.373	2.36951	0.0424	13.9387	NA	NA	0.15235	14.1387	0.02606	2.36951	0.070698	NA	NA	NA	NA	NA	165.842	3.87953	4.46593	143.984	18.9822	19.1119	NA	NA	NA	2.07794	NA		165.842	3.87953	2.3393	4.46593	2.70291
UK058	UK058_265	NA	525	11550	12.75	0.0700549	NA	NA	38.2409	2.02729	0.0485	8.3633	NA	NA	0.17487	8.60551	0.02615	2.02729	0.080141	NA	NA	NA	NA	NA	166.407	3.3304	4.00229	163.636	13.0063	13.2449	NA	NA	NA	67.3386	NA		166.407	3.3304	2.00135	4.00229	2.40689
UK058	UK058_57	NA	235	5040	8.5	0.0804163	NA	NA	38.0662	2.17193	0.051	9.5097	NA	NA	0.184727	9.75458	0.02627	2.17193	-0.11217	NA	NA	NA	NA	NA	167.161	3.58396	4.22086	172.12	15.4449	15.6658	NA	NA	NA	54.224	NA		167.161	3.58396	2.14401	4.22086	2.51965
UK058	UK058_147	NA	117	2577	4.42	0.0866667	NA	NA	38.0518	2.2852	0.0483	11.5265	NA	NA	0.175014	11.7509	0.02628	2.2852	-0.025877	NA	NA	NA	NA	NA	167.224	3.77227	4.38231	163.761	17.7736	17.9492	NA	NA	NA	70.4111	NA		167.224	3.77227	2.25582	4.38231	2.62323
UK058	UK058_79	NA	782	17010	20.1	0.0810484	NA	NA	37.9363	1.98433	0.0505	7.75608	NA	NA	0.183543	8.00589	0.02636	1.98433	0.12537	NA	NA	NA	NA	NA	167.726	3.28532	3.97461	171.105	12.6071	12.8739	NA	NA	NA	59.3024	NA		167.726	3.28532	1.95874	3.97461	2.36803
UK058	UK058_156	NA	518	12150	15.6	0.0725581	NA	NA	37.8358	2.04231	0.0473	8.23021	NA	NA	0.172369	8.47982	0.02643	2.04231	0.077895	NA	NA	NA	NA	NA	168.166	3.39007	4.06481	161.473	12.66	12.8991	NA	NA	NA	29.6015	NA		168.166	3.39007	2.0159	4.06481	2.42195
UK058	UK058_54	NA	181	3690	7.1	0.0817031	NA	NA	37.8072	2.23575	0.0549	9.97061	NA	NA	0.200216	10.2182	0.02645	2.23575	0.19573	NA	NA	NA	NA	NA	168.292	3.71388	4.33941	185.309	17.3096	17.5354	NA	NA	NA	4.6781	NA		168.292	3.71388	2.20681	4.33941	2.57762
UK058	UK058_6	NA	383	8090	16	0.0747664	NA	NA	37.7358	2.11438	0.0521	8.84614	NA	NA	0.190364	9.09532	0.0265	2.11438	0.0057382	NA	NA	NA	NA	NA	168.606	3.51876	4.17585	176.94	14.7701	15.0129	NA	NA	NA	27.341	NA		168.606	3.51876	2.08697	4.17585	2.47035
UK058	UK058_228	NA	399	9220	13.24	0.0828536	NA	NA	37.7216	2.06635	0.0479	8.71217	NA	NA	0.175084	8.95387	0.02651	2.06635	0.0041026	NA	NA	NA	NA	NA	168.668	3.44008	4.11023	163.822	13.547	13.7767	NA	NA	NA	48.6589	NA		168.668	3.44008	2.03955	4.11023	2.44109
UK058	UK058_29	NA	132	2560	2.08	0.0724739	NA	NA	37.6223	2.42393	0.054	11.4268	NA	NA	0.197902	11.681	0.02658	2.42393	0.18245	NA	NA	NA	NA	NA	169.108	4.04576	4.63185	183.349	19.5972	19.7931	NA	NA	NA	14.2176	NA		169.108	4.04576	2.39241	4.63185	2.73796
UK058	UK058_33	NA	75	1536	1.98	0.079646	NA	NA	37.4672	2.34033	0.0538	12.6077	NA	NA	0.197985	12.823	0.02669	2.34033	-0.021113	NA	NA	NA	NA	NA	169.799	3.92197	4.52867	183.42	21.5212	21.6999	NA	NA	NA	21.7515	NA		169.799	3.92197	2.30978	4.52867	2.65961
UK058	UK058_269	NA	445	9310	14.7	0.0724138	NA	NA	37.3972	2.02784	0.0526	8.51654	NA	NA	0.193932	8.75463	0.02674	2.02784	-0.091353	NA	NA	NA	NA	NA	170.113	3.4045	4.091	179.978	14.44	14.696	NA	NA	NA	19.4199	NA		170.113	3.4045	2.00132	4.091	2.39522
UK058	UK058_286	NA	515	11380	14.2	0.0771739	NA	NA	37.3972	2.11806	0.0504	8.43768	NA	NA	0.18582	8.69946	0.02674	2.11806	0.17216	NA	NA	NA	NA	NA	170.113	3.55597	4.21789	173.057	13.8428	14.0913	NA	NA	NA	66.7471	NA		170.113	3.55597	2.09036	4.21789	2.47852
UK058	UK058_146	NA	138	2780	4.26	0.0700658	NA	NA	37.3832	2.28224	0.0528	10.7143	NA	NA	0.194742	10.9547	0.02675	2.28224	0.071947	NA	NA	NA	NA	NA	170.175	3.833	4.45436	180.667	18.1327	18.3387	NA	NA	NA	25.28	NA		170.175	3.833	2.25238	4.45436	2.61292
UK058	UK058_166	NA	139	2980	5.73	0.0832849	NA	NA	37.1885	2.28778	0.0517	10.9557	NA	NA	0.191683	11.192	0.02689	2.28778	0.18793	NA	NA	NA	NA	NA	171.054	3.86189	4.48511	178.064	18.2812	18.4802	NA	NA	NA	43.6591	NA		171.054	3.86189	2.2577	4.48511	2.62153
UK058	UK058_235	NA	343	7040	12.05	0.0805481	NA	NA	36.9276	2.10609	0.0505	9.20189	NA	NA	0.188556	9.43983	0.02708	2.10609	0.18778	NA	NA	NA	NA	NA	172.247	3.57964	4.25296	175.397	15.2072	15.4393	NA	NA	NA	67.402	NA		172.247	3.57964	2.0782	4.25296	2.46859
UK058	UK058_47	NA	599	12710	19.3	0.0831897	NA	NA	36.8732	2.11253	0.0482	8.32746	NA	NA	0.180235	8.59124	0.02712	2.11253	-0.071717	NA	NA	NA	NA	NA	172.498	3.59574	4.26831	168.262	13.3223	13.5675	NA	NA	NA	54.5695	NA		172.498	3.59574	2.08451	4.26831	2.47948
UK058	UK058_279	NA	793	16060	23	0.0732484	NA	NA	36.7512	2.05257	0.0531	7.55017	NA	NA	0.199216	7.8242	0.02721	2.05257	0.1488	NA	NA	NA	NA	NA	173.063	3.50498	4.19621	184.463	13.1984	13.4907	NA	NA	NA	8.43804	NA		173.063	3.50498	2.02526	4.19621	2.41983
UK058	UK058_58	NA	714	16230	13.9	0.0863891	NA	NA	36.6703	1.99302	0.0489	7.868	NA	NA	0.183863	8.1165	0.02727	1.99302	0.048892	NA	NA	NA	NA	NA	173.439	3.41059	4.12047	171.38	12.8002	13.0638	NA	NA	NA	75.2639	NA		173.439	3.41059	1.96644	4.12047	2.37731
UK058	UK058_27	NA	308	7110	11.6	0.0822695	NA	NA	36.3901	2.15055	0.0516	9.03575	NA	NA	0.195509	9.28814	0.02748	2.15055	0.36372	NA	NA	NA	NA	NA	174.757	3.70776	4.37882	181.319	15.4243	15.6675	NA	NA	NA	36.6788	NA		174.757	3.70776	2.12166	4.37882	2.50885
UK058	UK058_144	NA	455	10300	14.8	0.0826816	NA	NA	36.2845	2.14184	0.0486	8.56738	NA	NA	0.184679	8.83105	0.02756	2.14184	0.19304	NA	NA	NA	NA	NA	175.259	3.7032	4.37849	172.079	13.9793	14.2229	NA	NA	NA	64.3196	NA		175.259	3.7032	2.11299	4.37849	2.4992
UK058	UK058_160	NA	112	2740	2.36	0.0781457	NA	NA	36.1272	2.34965	0.0433	12.2358	NA	NA	0.165255	12.4594	0.02768	2.34965	-0.0089303	NA	NA	NA	NA	NA	176.012	4.07971	4.70614	155.293	17.9434	18.1012	NA	NA	NA	2.32974	NA		176.012	4.07971	2.31786	4.70614	2.69033
UK058	UK058_192	NA	220	4920	5.95	0.0835674	NA	NA	36.1011	2.28522	0.0491	9.77475	NA	NA	0.187526	10.0383	0.0277	2.28522	0.13841	NA	NA	NA	NA	NA	176.137	3.97063	4.61274	174.516	16.0971	16.3146	NA	NA	NA	83.9679	NA		176.137	3.97063	2.25428	4.61274	2.61948
UK058	UK058_194	NA	44	930	1.19	0.0901515	NA	NA	36.1011	2.71643	0.056	15.4047	NA	NA	0.213879	15.6424	0.0277	2.71643	-0.049989	NA	NA	NA	NA	NA	176.137	4.71988	5.2715	196.803	27.9921	28.1486	NA	NA	NA	15.2447	NA		176.137	4.71988	2.67966	5.2715	2.98079
UK058	UK058_212	NA	324	6760	9.63	0.0853723	NA	NA	35.8551	2.06363	0.0508	9.12405	NA	NA	0.19535	9.35451	0.02789	2.06363	-0.068368	NA	NA	NA	NA	NA	177.329	3.60954	4.3144	181.184	15.524	15.7653	NA	NA	NA	63.4175	NA		177.329	3.60954	2.0355	4.3144	2.4296
UK058	UK058_111	NA	228	5380	8.57	0.0932535	NA	NA	35.5114	2.12553	0.0452	9.78917	NA	NA	0.175498	10.0173	0.02816	2.12553	0.0091387	NA	NA	NA	NA	NA	179.022	3.75281	4.44686	164.179	15.1867	15.3927	NA	NA	NA	5.55886	NA		179.022	3.75281	2.09628	4.44686	2.49573
UK058	UK058_123	NA	334	6950	6.97	0.0799312	NA	NA	35.4736	2.0788	0.0533	9.12244	NA	NA	0.207168	9.3563	0.02819	2.0788	-0.0028619	NA	NA	NA	NA	NA	179.21	3.67412	4.382	191.174	16.3052	16.5586	NA	NA	NA	15.4679	NA		179.21	3.67412	2.05018	4.382	2.43735
UK058	UK058_255	NA	71	1450	1.2	0.0648649	NA	NA	35.461	2.36266	0.049	13.5095	NA	NA	0.190523	13.7145	0.0282	2.36266	-0.081507	NA	NA	NA	NA	NA	179.273	4.17725	4.81208	177.075	22.2889	22.4508	NA	NA	NA	84.8327	NA		179.273	4.17725	2.33011	4.81208	2.68578
UK058	UK058_25	NA	441	10260	11.95	0.0761146	NA	NA	35.0754	2.19315	0.0456	8.91251	NA	NA	0.179252	9.17839	0.02851	2.19315	0.10567	NA	NA	NA	NA	NA	181.216	3.91901	4.60304	167.416	14.1671	14.3958	NA	NA	NA	5.20345	NA		181.216	3.91901	2.16261	4.60304	2.54934
UK058	UK058_168	NA	148	3140	1.47	0.288235	NA	NA	34.7947	2.27733	0.051	10.8426	NA	NA	0.202096	11.0791	0.02874	2.27733	0.22618	NA	NA	NA	NA	NA	182.658	4.10133	4.76886	186.898	18.9149	19.125	NA	NA	NA	64.5939	NA		182.658	4.10133	2.24537	4.76886	2.61096
UK058	UK058_239	NA	566	12100	22.9	0.0786942	NA	NA	34.4353	2.06939	0.0495	8.30353	NA	NA	0.1982	8.55751	0.02904	2.06939	0.052994	NA	NA	NA	NA	NA	184.537	3.76465	4.49605	183.602	14.3741	14.6407	NA	NA	NA	89.8441	NA		184.537	3.76465	2.04005	4.49605	2.43704
UK058	UK058_93	NA	648	14490	28.1	0.0852807	NA	NA	34.3407	2.01946	0.05	7.936	NA	NA	0.200753	8.18891	0.02912	2.01946	0.23855	NA	NA	NA	NA	NA	185.038	3.68365	4.43211	185.763	13.9025	14.1838	NA	NA	NA	91.4518	NA		185.038	3.68365	1.99075	4.43211	2.39517
UK058	UK058_89	NA	378	8860	25.2	0.0884211	NA	NA	33.9905	2.05404	0.0471	8.74999	NA	NA	0.191058	8.98785	0.02942	2.05404	0.24624	NA	NA	NA	NA	NA	186.917	3.78423	4.52955	177.531	14.6402	14.8866	NA	NA	NA	18.3848	NA		186.917	3.78423	2.02455	4.52955	2.42379
UK058	UK058_226	NA	668	15530	29.9	0.0847025	NA	NA	33.1455	2.00295	0.0487	7.99783	NA	NA	0.202584	8.24482	0.03017	2.00295	0.21834	NA	NA	NA	NA	NA	191.612	3.78142	4.56137	187.31	14.1036	14.3852	NA	NA	NA	53.1571	NA		191.612	3.78142	1.97348	4.56137	2.38129
UK058	UK058_165	NA	342	6750	6.41	0.0931686	NA	NA	32.4675	2.06854	0.0555	9.06317	NA	NA	0.235692	9.29623	0.0308	2.06854	0.28612	NA	NA	NA	NA	NA	195.553	3.98436	4.75903	214.887	18.006	18.2894	NA	NA	NA	2.67989	NA		195.553	3.98436	2.03748	4.75903	2.43758
UK058	UK058_128	NA	191	4380	6.32	0.0982893	NA	NA	32.3415	2.19434	0.0488	10.246	NA	NA	0.208047	10.4784	0.03092	2.19434	-0.031742	NA	NA	NA	NA	NA	196.304	4.24265	4.98243	191.912	18.3252	18.5526	NA	NA	NA	64.2178	NA		196.304	4.24265	2.16127	4.98243	2.54138
UK058	UK058_234	NA	174	3990	4.21	0.0897655	NA	NA	32.3415	2.20149	0.0523	10.079	NA	NA	0.222968	10.3166	0.03092	2.20149	0.0087015	NA	NA	NA	NA	NA	196.304	4.25647	4.99421	204.377	19.1006	19.3451	NA	NA	NA	41.0087	NA		196.304	4.25647	2.16831	4.99421	2.53941
UK058	UK058_220	NA	297	6810	7.41	0.0905868	NA	NA	32.1854	2.10032	0.0461	9.53714	NA	NA	0.197489	9.76567	0.03107	2.10032	-0.044107	NA	NA	NA	NA	NA	197.242	4.07998	4.8513	183	16.3547	16.5881	NA	NA	NA	9.23796	NA		197.242	4.07998	2.06852	4.8513	2.47183
UK058	UK058_92	NA	196	4500	5.8	0.0897833	NA	NA	31.7058	2.19084	0.0507	10.075	NA	NA	0.220481	10.3104	0.03154	2.19084	-0.038616	NA	NA	NA	NA	NA	200.179	4.31821	5.0734	202.31	18.9146	19.1569	NA	NA	NA	82.7717	NA		200.179	4.31821	2.15717	5.0734	2.53289
UK058	UK058_229	NA	449	9420	9.8	0.0924528	NA	NA	31.6957	2.0457	0.0529	8.50079	NA	NA	0.230121	8.74347	0.03155	2.0457	0.17764	NA	NA	NA	NA	NA	200.242	4.03338	4.83373	210.299	16.6097	16.9049	NA	NA	NA	22.1685	NA		200.242	4.03338	2.01425	4.83373	2.41205
UK058	UK058_55	NA	638	14370	18.1	0.0900498	NA	NA	31.5159	2.17409	0.0502	8.07295	NA	NA	0.219622	8.36057	0.03173	2.17409	0.24331	NA	NA	NA	NA	NA	201.367	4.31023	5.07479	201.595	15.2879	15.5849	NA	NA	NA	97.5473	NA		201.367	4.31023	2.14049	5.07479	2.52014
UK058	UK058_276	NA	183	4150	3.3	0.0942857	NA	NA	31.407	2.21373	0.0489	10.3299	NA	NA	0.214676	10.5644	0.03184	2.21373	-0.11405	NA	NA	NA	NA	NA	202.054	4.40355	5.15897	197.469	18.9605	19.192	NA	NA	NA	64.5062	NA		202.054	4.40355	2.17939	5.15897	2.5575
UK058	UK058_122	NA	127	2620	2.72	0.0891803	NA	NA	31.3185	2.19814	0.0545	11.101	NA	NA	0.239937	11.3165	0.03193	2.19814	0.010665	NA	NA	NA	NA	NA	202.616	4.38453	5.1466	218.369	22.2387	22.4755	NA	NA	NA	16.6683	NA		202.616	4.38453	2.16396	5.1466	2.53323
UK058	UK058_246	NA	344	7600	9.62	0.0925	NA	NA	30.9502	2.12132	0.0517	9.19249	NA	NA	0.230318	9.43408	0.03231	2.12132	0.075678	NA	NA	NA	NA	NA	204.99	4.28008	5.07454	210.462	17.9344	18.2085	NA	NA	NA	54.6829	NA		204.99	4.28008	2.08795	5.07454	2.47302
UK058	UK058_26	NA	228	4960	4.96	0.097446	NA	NA	30.2115	2.1354	0.0511	9.82036	NA	NA	0.233212	10.0498	0.0331	2.1354	-0.021162	NA	NA	NA	NA	NA	209.921	4.41045	5.21918	212.846	19.2999	19.5601	NA	NA	NA	76.8874	NA		209.921	4.41045	2.101	5.21918	2.4844
UK058	UK058_164	NA	464	10320	13.5	0.103846	NA	NA	29.5946	2.06682	0.0486	8.30766	NA	NA	0.226426	8.5609	0.03379	2.06682	0.31471	NA	NA	NA	NA	NA	214.225	4.35489	5.20289	207.244	16.0498	16.3473	NA	NA	NA	35.8157	NA		214.225	4.35489	2.03286	5.20289	2.42771
UK058	UK058_71	NA	138	3182	3.67	0.10309	NA	NA	29.4118	2.15374	0.0497	10.7554	NA	NA	0.23299	10.969	0.034	2.15374	-0.10639	NA	NA	NA	NA	NA	215.534	4.56532	5.38933	212.664	21.0491	21.2876	NA	NA	NA	79.3908	NA		215.534	4.56532	2.11814	5.38933	2.50259
UK058	UK058_256	NA	587	12710	14	0.0937709	NA	NA	29.0698	2.02896	0.0508	8.01379	NA	NA	0.240948	8.26665	0.0344	2.02896	0.15348	NA	NA	NA	NA	NA	218.028	4.34972	5.22594	219.196	16.2992	16.623	NA	NA	NA	88.5405	NA		218.028	4.34972	1.99503	5.22594	2.39653
UK058	UK058_196	NA	356	8140	12.3	0.107517	NA	NA	28.6615	2.11385	0.0493	9.08982	NA	NA	0.237164	9.33238	0.03489	2.11385	-0.046952	NA	NA	NA	NA	NA	221.081	4.5941	5.4524	216.096	18.1673	18.451	NA	NA	NA	59.7936	NA		221.081	4.5941	2.07802	5.4524	2.47015
UK058	UK058_96	NA	588	12220	11.84	0.107931	NA	NA	28.4495	2.00002	0.0525	7.98456	NA	NA	0.25444	8.23124	0.03515	2.00002	0.010437	NA	NA	NA	NA	NA	222.7	4.378	5.28341	230.177	16.954	17.2936	NA	NA	NA	39.3414	NA		222.7	4.378	1.96587	5.28341	2.36769
UK058	UK058_207	NA	599	13490	12.09	0.11021	NA	NA	28.0348	2.02914	0.049	8.22918	NA	NA	0.240991	8.47566	0.03567	2.02914	0.065338	NA	NA	NA	NA	NA	225.938	4.50519	5.41257	219.231	16.7138	17.0297	NA	NA	NA	42.9379	NA		225.938	4.50519	1.994	5.41257	2.39943
UK058	UK058_157	NA	145	2824	3.49	0.109063	NA	NA	27.933	2.35012	0.0556	11.0815	NA	NA	0.274447	11.328	0.0358	2.35012	-0.17043	NA	NA	NA	NA	NA	226.747	5.23619	6.0399	246.243	24.7746	25.0379	NA	NA	NA	13.9562	NA		226.747	5.23619	2.30927	6.0399	2.64755
UK058	UK058_135	NA	123	2781	3.68	0.110378	NA	NA	25.8732	2.16239	0.0484	11.2566	NA	NA	0.257927	11.4624	0.03865	2.16239	0.013043	NA	NA	NA	NA	NA	244.46	5.18719	6.11654	232.995	23.8685	24.1163	NA	NA	NA	34.3965	NA		244.46	5.18719	2.1219	6.11654	2.50716
UK058	UK058_9	NA	521	10890	23.4	0.165254	NA	NA	16.9492	2.11365	0.0542	9.22707	NA	NA	0.440913	9.46606	0.059	2.11365	-0.13085	NA	NA	NA	NA	NA	369.541	7.59115	9.00964	370.896	29.4195	29.8664	NA	NA	NA	93.1108	NA		369.541	7.59115	2.05421	9.00964	2.43727
UK058	UK058_282	NA	389	8300	9.37	0.155648	NA	NA	16.9492	2.11365	0.0517	8.95806	NA	NA	0.420575	9.20404	0.059	2.11365	0.15492	NA	NA	NA	NA	NA	369.541	7.59115	9.00964	356.462	27.6755	28.1199	NA	NA	NA	33.9197	NA		369.541	7.59115	2.05421	9.00964	2.44102
UK058	UK058_278	NA	846	16940	28.5	0.168042	NA	NA	15.3492	1.9918	0.0539	7.60333	NA	NA	0.484177	7.85989	0.06515	1.9918	0.083367	NA	NA	NA	NA	NA	406.87	7.8536	9.49008	400.935	26.0412	26.6129	NA	NA	NA	65.4126	NA		406.87	7.8536	1.93025	9.49008	2.33464
UK058	UK058_98	NA	539	10810	18.3	0.200658	NA	NA	14.6628	2.06407	0.0557	8.23635	NA	NA	0.52377	8.49105	0.0682	2.06407	0.17901	NA	NA	NA	NA	NA	425.302	8.49523	10.1535	427.667	29.6439	30.2026	NA	NA	NA	87.2038	NA		425.302	8.49523	1.99746	10.1535	2.38695
UK058	UK058_237	NA	2300	44000	125.3	0.201447	NA	NA	13.6407	1.98434	0.0575	6.48087	NA	NA	0.581209	6.77785	0.07331	1.98434	0.48466	NA	NA	NA	NA	NA	456.067	8.7372	10.5703	465.238	25.302	26.0463	NA	NA	NA	41.5348	NA		456.067	8.7372	1.91577	10.5703	2.32063
UK058	UK058_28	NA	1135	22590	28.3	0.218028	NA	NA	13.6054	1.96683	0.0551	7.23115	NA	NA	0.558393	7.49386	0.0735	1.96683	0.010851	NA	NA	NA	NA	NA	457.208	8.68101	10.5321	450.48	27.2711	27.9291	NA	NA	NA	63.6202	NA		457.208	8.68101	1.8987	10.5321	2.30662
UK058	UK058_75	NA	1041	20120	40	0.242131	NA	NA	12.6422	2.08804	0.0562	7.3182	NA	NA	0.612935	7.61026	0.0791	2.08804	-0.14381	NA	NA	NA	NA	NA	490.748	9.86672	11.7523	485.409	29.373	30.0604	NA	NA	NA	74.041	NA		490.748	9.86672	2.01054	11.7523	2.39826
UK058	UK058_90	NA	333	6420	13.94	0.25438	NA	NA	11.534	2.1218	0.0574	8.99746	NA	NA	0.686171	9.24426	0.0867	2.1218	0.20414	NA	NA	506.935	198.866	199.998	535.991	10.9127	12.9375	530.497	38.2153	38.824	NA	NA	NA	76.9084	-5.73175		535.991	10.9127	2.03599	12.9375	2.41436
UK058	UK058_188	NA	77	1237	0.002	0.0327869	NA	NA	10.2987	2.61813	0.069	12.9679	NA	NA	0.923782	13.2296	0.0971	2.61813	0.26665	NA	NA	898.74	270.046	270.794	597.391	14.9377	16.8096	664.358	64.5914	65.0966	NA	NA	NA	3.73376	33.5301		597.391	14.9377	2.50048	16.8096	2.81763
UK058	UK058_16	NA	1710	30100	61.1	0.288208	NA	NA	9.80392	2.01858	0.063	6.81319	NA	NA	0.886017	7.10593	0.102	2.01858	0.2573	NA	NA	708.231	145.28	146.714	626.119	12.0443	14.4935	644.227	33.9085	34.8175	NA	NA	NA	27.5287	11.5939		626.119	12.0443	1.92365	14.4935	2.31252
UK058	UK058_41	NA	1575	27790	39.6	0.305556	NA	NA	9.5511	2.02707	0.0623	6.81834	NA	NA	0.899365	7.11328	0.1047	2.02707	0.367	NA	NA	684.423	145.961	147.4	641.894	12.3849	14.8839	651.388	34.2131	35.1283	NA	NA	NA	55.2474	6.21383		641.894	12.3849	1.92942	14.8839	2.31887
UK058	UK058_20	NA	2970	53600	184	0.302135	NA	NA	9.1659	1.97105	0.0623	6.25443	NA	NA	0.937161	6.55766	0.1091	1.97105	0.17017	NA	NA	684.423	133.832	135.397	667.519	12.4989	15.1536	671.395	32.2235	33.2354	NA	NA	NA	81.1823	2.46981		667.519	12.4989	1.87244	15.1536	2.26905
UK058	UK058_2	NA	1002	17900	14.9	0.310417	NA	NA	9.15751	2.00494	0.0617	7.4964	NA	NA	0.928986	7.75989	0.1092	2.00494	0.15905	NA	NA	663.727	161.118	162.434	668.1	12.7243	15.344	667.101	37.9636	38.8189	NA	NA	NA	95.8102	-0.658916		668.1	12.7243	1.90455	15.344	2.29686
UK058	UK058_15	NA	3200	49100	14.5	0.450311	NA	NA	6.43501	1.96348	0.0721	6.15127	NA	NA	1.54485	6.45704	0.1554	1.96348	0.15885	NA	NA	988.765	125.397	126.911	931.163	17.0241	20.6655	948.442	39.8209	41.1105	NA	NA	NA	39.93	5.82565		931.163	17.0241	1.82826	20.6655	2.21494
UK058	UK058_271	NA	681	9530	13.1	0.409375	NA	NA	6.19579	2.12777	0.0799	8.21379	NA	NA	1.77808	8.48491	0.1614	2.12777	-0.014999	NA	NA	1194.52	162.632	163.74	964.552	19.0619	22.5804	1037.48	55.1965	56.2396	NA	NA	NA	1.55916	19.2519		964.552	19.0619	1.97624	22.5804	2.32322
UK058	UK058_44	NA	1677	26500	38	0.464548	NA	NA	6.06428	1.99174	0.0701	6.86674	NA	NA	1.59382	7.14977	0.1649	1.99174	0.089852	NA	NA	931.284	141.302	142.675	983.95	18.1754	21.9629	967.795	44.6377	45.8204	NA	NA	NA	48.5709	-5.65524		983.95	18.1754	1.84719	21.9629	2.23657
UK058	UK058_183	NA	484	7130	17.3	0.508824	NA	NA	5.9453	2.17121	0.0742	8.53421	NA	NA	1.7208	8.80607	0.1682	2.17121	0.19419	NA	NA	1046.91	172.771	173.863	1002.19	20.1526	23.7361	1016.32	56.6103	57.6043	NA	NA	NA	61.7217	4.27221		1002.19	20.1526	2.01086	23.7361	2.36655
UK058	UK058_176	NA	6410	95400	46.6	0.481903	NA	NA	5.85823	1.94884	0.0744	5.59678	NA	NA	1.75109	5.92637	0.1707	1.94884	-0.048446	NA	NA	1052.34	112.956	114.6	1015.97	18.3182	22.2902	1027.56	38.3202	39.789	NA	NA	NA	59.3125	3.45621		1015.97	18.3182	1.80303	22.2902	2.1891
UK058	UK058_221	NA	1560	23210	28.3	0.46932	NA	NA	5.8548	2.00129	0.073	6.84574	NA	NA	1.71914	7.13227	0.1708	2.00129	0.19417	NA	NA	1013.95	139.086	140.446	1016.52	18.8206	22.7085	1015.7	45.8176	47.0376	NA	NA	NA	97.1799	-0.252947		1016.52	18.8206	1.85148	22.7085	2.2341
UK058	UK058_158	NA	1886	29470	40.3	0.478055	NA	NA	5.84454	1.97894	0.0712	6.69647	NA	NA	1.6797	6.98276	0.1711	1.97894	0.1211	NA	NA	963.161	137.102	138.502	1018.17	18.6384	22.5684	1000.87	44.4713	45.7059	NA	NA	NA	44.954	-5.71121		1018.17	18.6384	1.83058	22.5684	2.22108
UK058	UK058_189	NA	3660	51800	48.2	0.473477	NA	NA	5.82072	1.94331	0.0764	6.09195	NA	NA	1.80975	6.39439	0.1718	1.94331	0.25796	NA	NA	1105.57	122.011	123.513	1022.02	18.3667	22.3699	1048.99	41.8433	43.2248	NA	NA	NA	19.4541	7.5572		1022.02	18.3667	1.7971	22.3699	2.18436
UK058	UK058_104	NA	1320	19700	41.5	0.482558	NA	NA	5.79374	1.97775	0.0729	7.15377	NA	NA	1.73488	7.42212	0.1726	1.97775	0.0833	NA	NA	1011.17	145.441	146.743	1026.42	18.7664	22.7278	1021.56	47.8421	49.0198	NA	NA	NA	84.5335	-1.5078		1026.42	18.7664	1.82834	22.7278	2.21545
UK058	UK058_159	NA	2230	32100	59.4	0.471429	NA	NA	5.78704	2.04127	0.074	6.53058	NA	NA	1.7631	6.84217	0.1728	2.04127	0.067062	NA	NA	1041.47	132.1	133.517	1027.52	19.3883	23.2509	1031.99	44.3588	45.6407	NA	NA	NA	85.003	1.33921		1027.52	19.3883	1.88691	23.2509	2.26142
UK058	UK058_182	NA	3690	52500	74.4	0.467925	NA	NA	5.78035	1.99151	0.0744	6.09311	NA	NA	1.77468	6.41031	0.173	1.99151	0.32677	NA	NA	1052.34	123.012	124.525	1028.62	18.9343	22.8808	1036.23	41.6543	43.0228	NA	NA	NA	70.2207	2.2539		1028.62	18.9343	1.84075	22.8808	2.2234
UK058	UK058_18	NA	1119	17820	23.1	0.46856	NA	NA	5.76369	2.09965	0.0689	7.3352	NA	NA	1.64824	7.62979	0.1735	2.09965	0.18804	NA	NA	895.748	151.839	153.133	1031.37	20.0116	23.7971	988.876	48.2539	49.3787	NA	NA	NA	7.5323	-15.1403		1031.37	20.0116	1.9403	23.7971	2.31695
UK058	UK058_1	NA	273	3650	4.28	0.582313	NA	NA	5.75374	2.3591	0.0798	9.82104	NA	NA	1.91229	10.1004	0.1738	2.3591	-0.0042698	NA	NA	1192.05	194.827	195.759	1033.01	22.5176	25.9494	1085.38	67.4413	68.3441	NA	NA	NA	14.9096	13.3413		1033.01	22.5176	2.1798	25.9494	2.49992
UK058	UK058_53	NA	417	6100	6.96	0.497143	NA	NA	5.75374	2.23123	0.0734	8.8735	NA	NA	1.75892	9.14972	0.1738	2.23123	0.15312	NA	NA	1025.02	180.296	181.351	1033.01	21.297	24.8976	1030.45	59.2978	60.263	NA	NA	NA	93.1632	-0.780177		1033.01	21.297	2.06164	24.8976	2.41063
UK058	UK058_46	NA	674	10770	7.27	0.445466	NA	NA	5.75043	2.03966	0.0695	7.92851	NA	NA	1.66642	8.18667	0.1739	2.03966	0.17817	NA	NA	913.617	163.744	164.941	1033.56	19.4781	23.3641	995.825	51.9964	53.0509	NA	NA	NA	14.1298	-13.1288		1033.56	19.4781	1.88455	23.3641	2.2671
UK058	UK058_136	NA	1376	20060	22.4	0.447106	NA	NA	5.74383	1.9979	0.0763	7.00763	NA	NA	1.83157	7.28687	0.1741	1.9979	0.3911	NA	NA	1102.95	140.497	141.807	1034.66	19.098	23.0553	1056.84	47.8949	49.1175	NA	NA	NA	31.9112	6.19167		1034.66	19.098	1.84582	23.0553	2.22831
UK058	UK058_227	NA	390	5940	9.97	0.444692	NA	NA	5.7241	2.14146	0.0711	8.62567	NA	NA	1.71263	8.88752	0.1747	2.14146	0.26753	NA	NA	960.29	176.968	178.062	1037.96	20.5303	24.2753	1013.27	57.0348	58.0181	NA	NA	NA	36.5298	-8.0877		1037.96	20.5303	1.97795	24.2753	2.34095
UK058	UK058_64	NA	915	14070	14.08	0.489399	NA	NA	5.71102	2.00453	0.0708	7.42004	NA	NA	1.70931	7.68603	0.1751	2.00453	0.15582	NA	NA	951.645	152.273	153.542	1040.15	19.255	23.2208	1012.03	49.2759	50.4081	NA	NA	NA	25.5131	-9.30024		1040.15	19.255	1.85118	23.2208	2.23813
UK058	UK058_233	NA	540	7420	10.94	0.501145	NA	NA	5.64972	2.04414	0.0792	8.48238	NA	NA	1.93286	8.72521	0.177	2.04414	-0.081215	NA	NA	1177.14	168.418	169.494	1050.56	19.8165	23.7542	1092.53	58.4513	59.4967	NA	NA	NA	19.0965	10.7526		1050.56	19.8165	1.88627	23.7542	2.25058
UK058	UK058_76	NA	2820	41500	15.28	0.50429	NA	NA	5.64653	1.95108	0.0743	6.27779	NA	NA	1.8143	6.57399	0.1771	1.95108	0.34785	NA	NA	1049.63	126.808	128.279	1051.11	18.9235	23.0181	1050.63	43.0584	44.4047	NA	NA	NA	98.1012	-0.141456		1051.11	18.9235	1.80033	23.0181	2.18993
UK058	UK058_100	NA	1183	17940	42.4	0.487356	NA	NA	5.64334	2.04384	0.0744	7.18246	NA	NA	1.81777	7.4676	0.1772	2.04384	0.25071	NA	NA	1052.34	145.118	146.408	1051.66	19.8326	23.7746	1051.88	48.9531	50.1438	NA	NA	NA	99.2666	0.0644329		1051.66	19.8326	1.88584	23.7746	2.26065
UK058	UK058_217	NA	3330	50100	27.6	0.489362	NA	NA	5.62746	1.98729	0.0722	6.16718	NA	NA	1.76899	6.47946	0.1777	1.98729	0.12918	NA	NA	991.584	125.668	127.178	1054.4	19.3301	23.3747	1034.15	42.0553	43.4082	NA	NA	NA	35.3193	-6.33469		1054.4	19.3301	1.83328	23.3747	2.223
UK058	UK058_103	NA	1508	23170	25.8	0.45583	NA	NA	5.55556	1.97868	0.0716	6.99732	NA	NA	1.777	7.27171	0.18	1.97868	0.018821	NA	NA	974.592	143.042	144.381	1066.97	19.4574	23.5611	1037.08	47.2815	48.4934	NA	NA	NA	23.3797	-9.47905		1066.97	19.4574	1.82361	23.5611	2.21723
UK058	UK058_106	NA	1085	15640	17.01	0.418966	NA	NA	5.55247	2.01471	0.0761	7.31227	NA	NA	1.88973	7.58475	0.1801	2.01471	0.051541	NA	NA	1097.7	146.754	148.012	1067.52	19.821	23.8657	1077.49	50.4046	51.5935	NA	NA	NA	70.8781	2.74952		1067.52	19.821	1.85673	23.8657	2.23314
UK058	UK058_140	NA	1588	22700	33.1	0.481805	NA	NA	5.5371	2.02215	0.0778	6.92345	NA	NA	1.93731	7.21271	0.1806	2.02215	0.12971	NA	NA	1141.77	138.004	139.322	1070.25	19.941	23.9829	1094.07	48.3399	49.5991	NA	NA	NA	34.3401	6.26387		1070.25	19.941	1.86321	23.9829	2.2356
UK058	UK058_202	NA	2980	42500	67.4	0.506006	NA	NA	5.53403	1.97815	0.0782	6.26882	NA	NA	1.94835	6.57352	0.1807	1.97815	0.13757	NA	NA	1151.96	124.71	126.161	1070.8	19.5163	23.6344	1097.88	44.1356	45.5158	NA	NA	NA	24.0888	7.0455		1070.8	19.5163	1.82259	23.6344	2.20048
UK058	UK058_91	NA	601	9040	20.1	0.515385	NA	NA	5.52181	2.11541	0.0703	8.09002	NA	NA	1.7554	8.36202	0.1811	2.11541	0.20283	NA	NA	937.128	166.493	167.662	1072.98	20.9096	24.8108	1029.15	54.1432	55.1963	NA	NA	NA	9.75437	-14.4967		1072.98	20.9096	1.94874	24.8108	2.31981
UK058	UK058_197	NA	1490	21100	65.5	0.496212	NA	NA	5.48847	2.04544	0.0765	6.93859	NA	NA	1.92181	7.2338	0.1822	2.04544	0.14445	NA	NA	1108.19	138.997	140.319	1078.98	20.3218	24.3553	1088.7	48.3485	49.6007	NA	NA	NA	69.6513	2.63523		1078.98	20.3218	1.88343	24.3553	2.25505
UK058	UK058_112	NA	366	4720	8.82	0.505444	NA	NA	5.43774	2.22354	0.0854	8.86467	NA	NA	2.16541	9.13928	0.1839	2.22354	-0.014906	NA	NA	1324.64	172.379	173.389	1088.25	22.2655	26.0539	1170.01	63.5652	64.6026	NA	NA	NA	1.90918	17.8457		1088.25	22.2655	2.046	26.0539	2.37576
UK058	UK058_3	NA	423	5980	12.57	0.54181	NA	NA	5.37346	2.20457	0.0785	8.51718	NA	NA	2.01427	8.79787	0.1861	2.20457	0.25007	NA	NA	1159.56	169.551	170.626	1100.21	22.2982	26.1529	1120.33	59.7646	60.8162	NA	NA	NA	49.3772	5.11769		1100.21	22.2982	2.02671	26.1529	2.37511
UK058	UK058_178	NA	1176	16910	33.2	0.530351	NA	NA	5.36193	2.03112	0.0763	7.17421	NA	NA	1.96203	7.45619	0.1865	2.03112	0.51973	NA	NA	1102.95	143.855	145.136	1102.39	20.581	24.7189	1102.58	50.1899	51.4144	NA	NA	NA	99.2971	0.0512971		1102.39	20.581	1.86695	24.7189	2.24233
UK058	UK058_145	NA	880	12440	20.6	0.476962	NA	NA	5.35906	2.04781	0.0778	7.64671	NA	NA	2.00167	7.91617	0.1866	2.04781	0.10891	NA	NA	1141.77	152.507	153.704	1102.93	20.7595	24.8711	1116.08	53.6511	54.8142	NA	NA	NA	63.641	3.40176		1102.93	20.7595	1.88221	24.8711	2.25234
UK058	UK058_154	NA	554	7880	12.64	0.511327	NA	NA	5.35332	2.10358	0.0767	8.59053	NA	NA	1.97548	8.84434	0.1868	2.10358	0.083836	NA	NA	1113.4	172.194	173.268	1104.02	21.3441	25.3677	1107.18	59.6913	60.7306	NA	NA	NA	91.8319	0.842778		1104.02	21.3441	1.93331	25.3677	2.29717
UK058	UK058_273	NA	4050	56100	101.3	0.547568	NA	NA	5.34474	1.97357	0.0797	6.00413	NA	NA	2.05605	6.32018	0.1871	1.97357	0.17024	NA	NA	1189.57	118.769	120.273	1105.65	20.0521	24.3012	1134.31	43.201	44.6606	NA	NA	NA	20.1508	7.05529		1105.65	20.0521	1.81361	24.3012	2.19092
UK058	UK058_186	NA	1090	14800	29.4	0.555766	NA	NA	5.29942	2.02838	0.0801	7.36055	NA	NA	2.08404	7.63492	0.1887	2.02838	0.19584	NA	NA	1199.45	145.531	146.763	1114.33	20.7572	24.9408	1143.56	52.4331	53.6541	NA	NA	NA	27.0638	7.09676		1114.33	20.7572	1.86275	24.9408	2.23383
UK058	UK058_285	NA	4340	61300	33.4	0.506061	NA	NA	5.2356	1.95475	0.0781	5.92377	NA	NA	2.05677	6.23795	0.191	1.95475	0.49505	NA	NA	1149.42	117.863	119.397	1126.79	20.2084	24.5661	1134.55	42.6432	44.1215	NA	NA	NA	67.6524	1.96867		1126.79	20.2084	1.79345	24.5661	2.18042
UK058	UK058_250	NA	959	13640	19	0.523416	NA	NA	5.19211	1.99489	0.0771	7.50156	NA	NA	2.04744	7.76228	0.1926	1.99489	0.15907	NA	NA	1123.78	149.993	151.215	1135.44	20.7683	25.0836	1131.44	53.0017	54.1962	NA	NA	NA	88.1422	-1.03819		1135.44	20.7683	1.82909	25.0836	2.20984
UK058	UK058_43	NA	7640	107300	105.8	0.516098	NA	NA	5.17598	1.98781	0.0781	5.50454	NA	NA	2.08046	5.85247	0.1932	1.98781	0.39849	NA	NA	1149.42	109.494	111.142	1138.69	20.7486	25.0879	1142.39	40.155	41.7326	NA	NA	NA	84.2235	0.933643		1138.69	20.7486	1.82215	25.0879	2.20273
UK058	UK058_243	NA	1072	16740	13.19	0.5276	NA	NA	5.16796	1.98128	0.0723	7.23503	NA	NA	1.92895	7.5014	0.1935	1.98128	0.27274	NA	NA	994.397	147.48	148.772	1140.31	20.7073	25.0641	1091.17	50.2036	51.4139	NA	NA	NA	3.9594	-14.6732		1140.31	20.7073	1.81594	25.0641	2.20475
UK058	UK058_198	NA	1396	19550	35.7	0.532042	NA	NA	5.16529	2.00782	0.0784	6.98286	NA	NA	2.09278	7.26579	0.1936	2.00782	0.33496	NA	NA	1157.03	138.882	140.187	1140.85	20.9938	25.3048	1146.44	49.9617	51.2446	NA	NA	NA	81.3345	1.39844		1140.85	20.9938	1.8402	25.3048	2.21765
UK058	UK058_74	NA	1870	26030	26	0.606061	NA	NA	5.11509	2.02803	0.0794	6.73177	NA	NA	2.14027	7.03062	0.1955	2.02803	0.3703	NA	NA	1182.12	133.372	134.72	1151.1	21.3792	25.6895	1161.91	48.6921	50.0261	NA	NA	NA	63.4986	2.6244		1151.1	21.3792	1.85728	25.6895	2.23105
UK058	UK058_50	NA	936	14180	27.2	0.564315	NA	NA	5.09944	2.00538	0.0734	7.39675	NA	NA	1.98461	7.66377	0.1961	2.00538	0.33503	NA	NA	1025.02	150.093	151.351	1154.34	21.1947	25.5566	1110.29	51.7889	52.9858	NA	NA	NA	6.60893	-12.6162		1154.34	21.1947	1.83609	25.5566	2.2176
UK058	UK058_249	NA	575	8090	9.41	0.543616	NA	NA	5.07614	2.05005	0.0796	8.14947	NA	NA	2.16212	8.40336	0.197	2.05005	0.02495	NA	NA	1187.09	161.525	162.642	1159.18	21.7499	26.049	1168.95	58.4068	59.5322	NA	NA	NA	75.2599	2.35119		1159.18	21.7499	1.87631	26.049	2.24502
UK058	UK058_34	NA	408	6050	8.07	0.551984	NA	NA	5.07357	2.17445	0.0747	9.02751	NA	NA	2.03006	9.28569	0.1971	2.17445	-0.061018	NA	NA	1060.44	182.471	183.502	1159.72	23.0794	27.1722	1125.64	63.2504	64.2506	NA	NA	NA	31.3988	-9.36231		1159.72	23.0794	1.99008	27.1722	2.35245
UK058	UK058_38	NA	3442	47770	51.5	0.528205	NA	NA	5.07357	1.96194	0.079	6.09819	NA	NA	2.14692	6.40603	0.1971	1.96194	0.22408	NA	NA	1172.13	120.944	122.43	1159.72	20.8239	25.2844	1164.06	44.4043	45.8654	NA	NA	NA	84.6079	1.05895		1159.72	20.8239	1.79559	25.2844	2.17929
UK058	UK058_56	NA	401	5640	3.21	0.539496	NA	NA	5.07099	2.16346	0.0739	8.87075	NA	NA	2.00934	9.13076	0.1972	2.16346	0.20414	NA	NA	1038.74	179.865	180.917	1160.26	22.9725	27.0846	1118.67	61.9809	62.9941	NA	NA	NA	16.8322	-11.6991		1160.26	22.9725	1.97994	27.0846	2.34018
UK058	UK058_117	NA	479	6760	12.39	0.583608	NA	NA	5.06842	2.15267	0.0807	8.38706	NA	NA	2.19534	8.65891	0.1973	2.15267	0.19429	NA	NA	1214.15	165.616	166.698	1160.8	22.8677	26.999	1179.56	60.4771	61.5754	NA	NA	NA	53.6902	4.39393		1160.8	22.8677	1.97	26.999	2.32338
UK058	UK058_230	NA	2620	37190	43	0.544304	NA	NA	5.03525	1.96642	0.0775	6.45674	NA	NA	2.12218	6.74954	0.1986	1.96642	0.086726	NA	NA	1134.09	128.804	130.217	1167.8	21.0039	25.4843	1156.05	46.6159	47.9999	NA	NA	NA	63.2949	-2.97244		1167.8	21.0039	1.7986	25.4843	2.18552
UK058	UK058_185	NA	3860	53100	61.7	0.585389	NA	NA	5.01505	1.97714	0.0801	6.0176	NA	NA	2.20221	6.33408	0.1994	1.97714	0.30622	NA	NA	1199.45	118.865	120.364	1172.1	21.1893	25.6647	1181.74	44.2586	45.7475	NA	NA	NA	65.3318	2.28061		1172.1	21.1893	1.80782	25.6647	2.18809
UK058	UK058_65	NA	7180	98800	148.5	0.591633	NA	NA	4.98753	1.96535	0.0794	5.5166	NA	NA	2.19501	5.85623	0.2005	1.96535	0.51464	NA	NA	1182.12	109.21	110.846	1178.01	21.1598	25.678	1179.46	40.874	42.4779	NA	NA	NA	93.3938	0.348414		1178.01	21.1598	1.79624	25.678	2.17978
UK058	UK058_193	NA	1310	17500	27.1	0.521154	NA	NA	4.98256	2.02211	0.0813	7.07842	NA	NA	2.24978	7.36159	0.2007	2.02211	-0.078633	NA	NA	1228.71	139.331	140.605	1179.08	21.789	26.2056	1196.72	51.7921	53.0882	NA	NA	NA	54.3434	4.03891		1179.08	21.789	1.84797	26.2056	2.21702
UK058	UK058_153	NA	744	10340	13.26	0.5304	NA	NA	4.9776	2.09624	0.0789	7.99104	NA	NA	2.18554	8.26141	0.2009	2.09624	0.37652	NA	NA	1169.63	158.768	159.91	1180.15	22.6066	26.8957	1176.44	57.6136	58.7618	NA	NA	NA	88.916	-0.899938		1180.15	22.6066	1.91556	26.8957	2.27906
UK058	UK058_48	NA	4100	55360	20.7	0.553772	NA	NA	4.84262	1.99612	0.0813	6.34439	NA	NA	2.31479	6.651	0.2065	1.99612	0.042705	NA	NA	1228.71	124.818	126.235	1210.14	22.0242	26.5953	1216.83	47.1938	48.6362	NA	NA	NA	79.4389	1.51068		1210.14	22.0242	1.81996	26.5953	2.19568
UK058	UK058_134	NA	936	13050	20.6	0.543536	NA	NA	4.83325	2.0774	0.081	7.43658	NA	NA	2.31072	7.72129	0.2069	2.0774	0.39608	NA	NA	1221.44	146.575	147.791	1212.28	22.9577	27.3865	1215.58	54.7729	56.0204	NA	NA	NA	89.5695	0.750209		1212.28	22.9577	1.89376	27.3865	2.25902
UK058	UK058_206	NA	1853	26000	22	0.554156	NA	NA	4.83325	1.99579	0.0793	6.71163	NA	NA	2.26222	7.00208	0.2069	1.99579	0.31484	NA	NA	1179.63	133.02	134.371	1212.28	22.0559	26.635	1200.6	49.3424	50.7053	NA	NA	NA	61.916	-2.76763		1212.28	22.0559	1.81937	26.635	2.19852
UK058	UK058_245	NA	4280	56800	177	0.55836	NA	NA	4.81	1.99498	0.084	5.97174	NA	NA	2.40788	6.29616	0.2079	1.99498	0.20474	NA	NA	1292.55	116.391	117.881	1217.62	22.1351	26.7341	1244.95	45.2005	46.7393	NA	NA	NA	23.9989	5.79728		1217.62	22.1351	1.8179	26.7341	2.18931
UK058	UK058_274	NA	1920	27600	25	0.544662	NA	NA	4.7081	2.00381	0.0759	6.65787	NA	NA	2.22279	6.95287	0.2124	2.00381	0.093319	NA	NA	1092.43	133.659	135.039	1241.59	22.6301	27.2941	1188.25	48.7297	50.0944	NA	NA	NA	3.56918	-13.6537		1241.59	22.6301	1.82267	27.2941	2.21388
UK058	UK058_200	NA	11250	149400	115.3	0.605567	NA	NA	4.69263	1.93466	0.0821	5.21337	NA	NA	2.41228	5.56077	0.2131	1.93466	0.32202	NA	NA	1247.9	102.213	103.926	1245.31	21.9084	26.7225	1246.26	39.9367	41.6712	NA	NA	NA	96.1036	0.207615		1245.31	21.9084	1.75927	26.7225	2.14563
UK058	UK058_116	NA	3930	51200	46.2	0.587039	NA	NA	4.65983	1.97312	0.0835	6.00543	NA	NA	2.47069	6.32127	0.2146	1.97312	0.48684	NA	NA	1280.93	117.243	118.728	1253.28	22.4734	27.2376	1263.49	45.7225	47.267	NA	NA	NA	61.0503	2.15864		1253.28	22.4734	1.79317	27.2376	2.17331
UK058	UK058_258	NA	1398	19750	25.8	0.59447	NA	NA	4.63607	2.01379	0.0772	7.00365	NA	NA	2.29598	7.28742	0.2157	2.01379	0.25436	NA	NA	1126.36	139.929	141.236	1259.11	23.0334	27.7375	1211.05	51.5894	52.9065	NA	NA	NA	5.3815	-11.786		1259.11	23.0334	1.82933	27.7375	2.21131
UK058	UK058_169	NA	796	10280	8.26	0.627183	NA	NA	4.55789	2.05189	0.0853	7.71065	NA	NA	2.5804	7.979	0.2194	2.05189	0.31257	NA	NA	1322.37	149.837	150.994	1278.7	23.7993	28.4958	1295.1	58.4538	59.7018	NA	NA	NA	55.9368	3.30191		1278.7	23.7993	1.86121	28.4958	2.22737
UK058	UK058_110	NA	6600	85100	85.8	0.617266	NA	NA	4.24989	1.94269	0.0853	5.56787	NA	NA	2.7674	5.89706	0.2353	1.94269	0.36433	NA	NA	1322.37	108.038	109.627	1362.22	23.8547	29.057	1346.79	44.0116	45.7156	NA	NA	NA	45.6681	-3.01349		1322.37	108.038	8.17003	109.627	8.05794
UK058	UK058_167	NA	1194	15390	15.3	0.659483	NA	NA	4.1806	2.0363	0.086	7.13115	NA	NA	2.83636	7.41619	0.2392	2.0363	0.19016	NA	NA	1338.18	138.207	139.452	1382.54	25.3386	30.4093	1365.21	55.7299	57.1047	NA	NA	NA	53.7692	-3.3145		1338.18	138.207	10.3279	139.452	10.1019
UK058	UK058_124	NA	776	9810	21	0.644567	NA	NA	4.09333	2.02504	0.0875	7.60435	NA	NA	2.94736	7.86937	0.2443	2.02504	0.21224	NA	NA	1371.53	146.747	147.911	1409.01	25.6302	30.8116	1394.17	59.7306	61.0414	NA	NA	NA	61.7022	-2.73298		1371.53	146.747	10.6995	147.911	10.5081
UK058	UK058_210	NA	5660	71200	125	0.64433	NA	NA	4.22119	1.9458	0.0876	5.70703	NA	NA	2.86135	6.02962	0.2369	1.9458	0.079912	NA	NA	1373.73	109.956	111.496	1370.56	24.0242	29.2483	1371.8	45.3984	47.0811	NA	NA	NA	96.0215	0.23045		1373.73	109.956	8.0042	111.496	8.13359
UK058	UK058_148	NA	2997	37010	43	0.680057	NA	NA	4.04531	1.98429	0.0888	6.22117	NA	NA	3.02665	6.52996	0.2472	1.98429	0.20643	NA	NA	1399.85	119.468	120.878	1424.02	25.3535	30.6731	1414.36	49.8779	51.4588	NA	NA	NA	70.417	-1.72664		1399.85	119.468	8.53432	120.878	8.4971
UK058	UK058_126	NA	3610	44610	58.2	0.640264	NA	NA	3.8625	2.02382	0.0902	6.12432	NA	NA	3.21988	6.45005	0.2589	2.02382	0.39006	NA	NA	1429.77	117.119	118.545	1484.21	26.8308	32.261	1461.96	50.0131	51.6372	NA	NA	NA	33.5097	-3.80788		1429.77	117.119	8.19147	118.545	7.99886
UK058	UK058_143	NA	1693	20060	40	0.70922	NA	NA	4.14422	2.00412	0.0916	6.92756	NA	NA	3.04757	7.21162	0.2413	2.00412	0.22267	NA	NA	1459.11	132.022	133.282	1393.45	25.1145	30.2891	1419.62	55.1886	56.6273	NA	NA	NA	34.851	4.49967		1459.11	132.022	9.04816	133.282	9.54695
UK058	UK058_14	NA	2260	26900	50.4	0.59364	NA	NA	4.33463	2.01904	0.0924	6.93375	NA	NA	2.93914	7.22174	0.2307	2.01904	-0.12289	NA	NA	1475.62	131.846	133.102	1338.17	24.3984	29.3576	1392.05	54.766	56.1897	NA	NA	NA	9.05378	9.31495		1475.62	131.846	8.93496	133.102	9.87287
UK058	UK058_17	NA	3780	45310	73.4	0.698382	NA	NA	4.06504	1.99005	0.0924	6.14016	NA	NA	3.13407	6.4546	0.246	1.99005	-0.031565	NA	NA	1475.62	116.694	118.108	1417.81	25.3281	30.6143	1441.09	49.7252	51.3377	NA	NA	NA	41.2996	3.91739		1475.62	116.694	7.90815	118.108	8.3018
UK058	UK058_262	NA	2035	23920	35.3	0.650691	NA	NA	3.70782	1.99972	0.093	6.63451	NA	NA	3.45832	6.92932	0.2697	1.99972	0.20404	NA	NA	1487.89	125.922	127.23	1539.28	27.3823	33.0468	1517.77	54.6303	56.1712	NA	NA	NA	43.7505	-3.45399		1487.89	125.922	8.46311	127.23	8.28271
UK058	UK058_84	NA	2560	30060	50.7	0.660156	NA	NA	3.91236	1.97056	0.094	6.37065	NA	NA	3.31276	6.66845	0.2556	1.97056	0.56032	NA	NA	1508.11	120.565	121.923	1467.29	25.8595	31.3545	1484.06	52.0559	53.6393	NA	NA	NA	44.1692	2.70691		1508.11	120.565	7.99443	121.923	8.31426
UK058	UK058_39	NA	2660	29880	69.2	0.703967	NA	NA	3.76364	2.0024	0.0971	6.35054	NA	NA	3.55723	6.65875	0.2657	2.0024	0.24111	NA	NA	1569.15	119.214	120.566	1518.94	27.0978	32.6897	1540.05	52.8233	54.4347	NA	NA	NA	43.1005	3.19973		1569.15	119.214	7.5974	120.566	7.92294
UK058	UK058_142	NA	4380	48030	114	0.780287	NA	NA	3.68189	2.02982	0.0996	5.99049	NA	NA	3.72984	6.32504	0.2716	2.02982	0.48809	NA	NA	1616.62	111.736	113.157	1548.92	27.9485	33.5742	1577.8	50.6871	52.3979	NA	NA	NA	19.8379	4.1881		1616.62	111.736	6.91166	113.157	7.30084
UK058	UK058_11	NA	4830	52700	62.2	0.759463	NA	NA	3.35345	1.98763	0.1009	5.91418	NA	NA	4.14859	6.23925	0.2982	1.98763	0.192	NA	NA	1640.73	109.964	111.399	1682.38	29.4322	35.5887	1663.93	51.0905	52.8619	NA	NA	NA	49.0457	-2.53822		1640.73	109.964	6.70213	111.399	6.63642
UK058	UK058_150	NA	5960	64700	63.4	0.770352	NA	NA	3.37268	1.95493	0.1011	5.68597	NA	NA	4.13311	6.01265	0.2965	1.95493	0.11749	NA	NA	1644.41	105.657	107.147	1673.93	28.8208	35.0347	1660.87	49.1963	51.0304	NA	NA	NA	62.732	-1.7954		1644.41	105.657	6.42524	107.147	6.41252
UK058	UK058_222	NA	7580	81200	150	0.763359	NA	NA	3.50385	1.95178	0.1015	5.45326	NA	NA	3.99412	5.79202	0.2854	1.95178	0.45802	NA	NA	1651.73	101.224	102.776	1618.5	27.9363	33.9772	1633	47.0688	48.9569	NA	NA	NA	49.5443	2.01167		1651.73	101.224	6.1284	102.776	6.34472
UK058	UK058_211	NA	8700	92700	96.9	0.819797	NA	NA	3.45304	1.94746	0.1019	5.35682	NA	NA	4.06887	5.69983	0.2896	1.94746	0.37599	NA	NA	1659.01	99.3362	100.913	1639.53	28.1925	34.3135	1648.09	46.4898	48.4143	NA	NA	NA	70.0541	1.17449		1659.01	99.3362	5.98766	100.913	6.15018
UK058	UK058_132	NA	3690	38400	80.1	0.801802	NA	NA	3.44353	2.0008	0.1038	6.03017	NA	NA	4.15619	6.35344	0.2904	2.0008	0.48956	NA	NA	1693.15	111.379	112.778	1643.53	29.0267	35.0255	1665.43	52.0458	53.7871	NA	NA	NA	34.0259	2.93078		1693.15	111.379	6.57822	112.778	6.85815
UK058	UK058_130	NA	8280	85840	73.4	0.796095	NA	NA	3.23729	1.94285	0.1052	5.42458	NA	NA	4.48059	5.762	0.3089	1.94285	0.38321	NA	NA	1717.81	99.8475	101.394	1735.29	29.5577	36.0029	1727.38	47.8666	49.8065	NA	NA	NA	72.7863	-1.01748		1717.81	99.8475	5.81248	101.394	5.84737
UK058	UK058_163	NA	4240	43700	46.4	0.87218	NA	NA	3.13578	1.9933	0.1062	5.93496	NA	NA	4.66961	6.26075	0.3189	1.9933	0.39343	NA	NA	1735.18	109.034	110.447	1784.35	31.0697	37.535	1761.81	52.4046	54.2094	NA	NA	NA	35.61	-2.83381		1735.18	109.034	6.28374	110.447	6.20095
UK058	UK058_5	NA	13660	141300	158.4	0.85253	NA	NA	3.22269	1.93503	0.1064	5.06175	NA	NA	4.55224	5.41901	0.3103	1.93503	0.22123	NA	NA	1738.63	92.9085	94.5582	1742.18	29.5406	36.0295	1740.57	45.1432	47.2061	NA	NA	NA	94.6567	-0.204171		1738.63	92.9085	5.34377	94.5582	5.42883
UK058	UK058_225	NA	2920	30100	58.8	0.806584	NA	NA	3.29489	1.99321	0.107	6.25184	NA	NA	4.47758	6.56189	0.3035	1.99321	0.24964	NA	NA	1748.94	114.68	116.021	1708.64	29.9173	36.1433	1726.83	54.5168	56.2288	NA	NA	NA	51.2714	2.30391		1748.94	114.68	6.55713	116.021	6.77904
UK058	UK058_77	NA	9370	94900	115.4	0.844802	NA	NA	3.24149	1.9713	0.1071	5.32414	NA	NA	4.5556	5.67737	0.3085	1.9713	0.41935	NA	NA	1750.65	97.591	99.159	1733.32	29.9609	36.3232	1741.19	47.3048	49.2783	NA	NA	NA	72.2031	0.989581		1750.65	97.591	5.57457	99.159	5.71678
UK058	UK058_49	NA	11880	121100	162.1	0.835567	NA	NA	3.15358	1.99835	0.1078	5.13659	NA	NA	4.7132	5.51162	0.3171	1.99835	0.52247	NA	NA	1762.56	94.0045	95.6259	1775.55	31.0149	37.4391	1769.59	46.2004	48.2428	NA	NA	NA	76.4941	-0.73698		1762.56	94.0045	5.3334	95.6259	5.38819
UK058	UK058_109	NA	3910	39300	51.4	0.921147	NA	NA	3.02297	2.05795	0.1081	6.0877	NA	NA	4.93052	6.42614	0.3308	2.05795	0.30424	NA	NA	1767.64	111.398	112.771	1842.26	32.9768	39.4493	1807.49	54.2992	56.076	NA	NA	NA	19.4901	-4.22138		1767.64	111.398	6.30209	112.771	6.14413
UK058	UK058_209	NA	7900	79700	53.9	0.844828	NA	NA	3.13381	1.95758	0.1081	5.46704	NA	NA	4.75613	5.80695	0.3191	1.95758	0.3507	NA	NA	1767.64	100.006	101.531	1785.33	30.5274	37.0931	1777.19	48.7567	50.7029	NA	NA	NA	73.1379	-1.00095		1767.64	100.006	5.6576	101.531	5.69172
UK058	UK058_42	NA	1574	16210	46.4	0.804159	NA	NA	3.28731	2.04497	0.1088	6.87034	NA	NA	4.56341	7.16823	0.3042	2.04497	0.14557	NA	NA	1779.42	125.598	126.815	1712.1	30.7485	36.8541	1742.61	59.7711	61.3485	NA	NA	NA	33.8153	3.78317		1779.42	125.598	7.05834	126.815	7.38549
UK058	UK058_162	NA	16060	162900	124.7	0.818779	NA	NA	3.32447	1.9419	0.1088	4.93964	NA	NA	4.5124	5.30764	0.3008	1.9419	0.36105	NA	NA	1779.42	90.2025	91.8834	1695.27	28.9478	35.2656	1733.26	44.144	46.2447	NA	NA	NA	8.1938	4.72885		1779.42	90.2025	5.06921	91.8834	5.39733
UK058	UK058_242	NA	11980	120700	138.7	0.835542	NA	NA	3.14861	1.95198	0.1089	5.14017	NA	NA	4.76881	5.49832	0.3176	1.95198	0.44035	NA	NA	1781.1	93.8541	95.4707	1778	30.3315	36.8891	1779.42	46.1831	48.2345	NA	NA	NA	94.6697	0.173954		1781.1	93.8541	5.26946	95.4707	5.36884
UK058	UK058_60	NA	3960	39550	62	0.923994	NA	NA	3.03859	1.97379	0.109	6.0042	NA	NA	4.94602	6.32031	0.3291	1.97379	0.1797	NA	NA	1782.77	109.659	111.048	1834.02	31.5059	38.1809	1810.15	53.4316	55.238	NA	NA	NA	39.8066	-2.87464		1782.77	109.659	6.15103	111.048	6.07226
UK058	UK058_68	NA	12090	122900	57.1	0.931485	NA	NA	3.03582	1.98812	0.1094	5.15071	NA	NA	4.96869	5.52109	0.3294	1.98812	0.49677	NA	NA	1789.45	93.9501	95.5618	1835.47	31.7564	38.3961	1814.01	46.7008	48.7585	NA	NA	NA	29.6264	-2.57217		1789.45	93.9501	5.25024	95.5618	5.21678
UK058	UK058_251	NA	4660	47200	157	0.840921	NA	NA	3.03214	1.97013	0.1095	5.88117	NA	NA	4.97927	6.20239	0.3298	1.97013	0.4192	NA	NA	1791.11	107.294	108.709	1837.41	31.4979	38.1937	1815.81	52.492	54.3334	NA	NA	NA	36.9723	-2.58514		1791.11	107.294	5.99034	108.709	5.9259
UK058	UK058_120	NA	29990	296700	59.5	0.843972	NA	NA	3.11429	1.95397	0.1112	4.5661	NA	NA	4.92319	4.96662	0.3211	1.95397	0.3893	NA	NA	1819.12	82.9607	84.7665	1795.1	30.6157	37.2225	1806.24	41.94	44.2118	NA	NA	NA	58.9506	1.32048		1819.12	82.9607	4.56049	84.7665	4.7147
UK058	UK058_133	NA	4010	40310	52.8	0.888889	NA	NA	3.07503	1.96515	0.1113	6.00575	NA	NA	4.99053	6.31909	0.3252	1.96515	0.43571	NA	NA	1820.75	109.176	110.557	1815.07	31.0876	37.7268	1817.72	53.5017	55.3111	NA	NA	NA	91.3671	0.311803		1820.75	109.176	5.99618	110.557	6.09018
UK058	UK058_195	NA	1748	17170	139.2	0.896907	NA	NA	3.13087	2.06302	0.1113	6.80371	NA	NA	4.90153	7.1096	0.3194	2.06302	-0.016482	NA	NA	1820.75	123.742	124.965	1786.8	32.1946	38.485	1802.52	60.0272	61.6372	NA	NA	NA	64.7832	1.86478		1820.75	123.742	6.79622	124.965	6.98005
UK058	UK058_32	NA	3980	38520	33.8	0.93396	NA	NA	2.94551	1.95763	0.1124	5.97965	NA	NA	5.26147	6.29194	0.3395	1.95763	0.049293	NA	NA	1838.58	108.463	109.848	1884.26	31.9853	38.8641	1862.63	53.7342	55.567	NA	NA	NA	47.6532	-2.48478		1838.58	108.463	5.89929	109.848	5.84696
UK058	UK058_83	NA	5980	58400	359	0.87561	NA	NA	3.03674	1.95761	0.1128	5.65141	NA	NA	5.12156	5.98085	0.3293	1.95761	0.44948	NA	NA	1845.01	102.41	103.872	1834.99	31.2619	37.9854	1839.69	50.8506	52.7664	NA	NA	NA	83.892	0.543152		1845.01	102.41	5.55067	103.872	5.6589
UK058	UK058_261	NA	5670	55500	94.1	0.840179	NA	NA	2.9985	1.95937	0.1128	5.6962	NA	NA	5.18688	6.02377	0.3335	1.95937	0.31365	NA	NA	1845.01	103.225	104.675	1855.32	31.5894	38.3722	1850.47	51.3219	53.2286	NA	NA	NA	84.8967	-0.559049		1845.01	103.225	5.5948	104.675	5.64469
UK058	UK058_179	NA	1498	14210	30.4	0.924012	NA	NA	3.18573	2.05748	0.114	6.98542	NA	NA	4.93398	7.28213	0.3139	2.05748	0.073696	NA	NA	1864.13	126.393	127.579	1759.87	31.6874	37.9094	1808.09	61.5561	63.131	NA	NA	NA	15.6816	5.59315		1864.13	126.393	6.78027	127.579	7.21359
UK058	UK058_35	NA	4030	38700	46.9	0.833037	NA	NA	3.23625	1.97849	0.1142	6.00371	NA	NA	4.86548	6.32131	0.309	1.97849	0.077274	NA	NA	1867.3	108.522	109.897	1735.78	30.1074	36.4584	1796.3	53.2915	55.0925	NA	NA	NA	4.43168	7.04297		1867.3	108.522	5.81174	109.897	6.28528
UK058	UK058_280	NA	7630	71700	111.7	0.818315	NA	NA	3.03767	1.94903	0.1147	5.44887	NA	NA	5.20624	5.78696	0.3292	1.94903	0.36675	NA	NA	1875.18	98.3696	99.8793	1834.5	31.1179	37.8641	1853.64	49.3307	51.3133	NA	NA	NA	42.5071	2.16907		1875.18	98.3696	5.24589	99.8793	5.43479
UK058	UK058_137	NA	1791	17290	33.2	0.899729	NA	NA	2.90613	2.07638	0.1149	6.74917	NA	NA	5.45137	7.06135	0.3441	2.07638	0.3033	NA	NA	1878.32	121.891	123.115	1906.36	34.2675	40.884	1892.97	60.6579	62.307	NA	NA	NA	65.3141	-1.49318		1878.32	121.891	6.48936	123.115	6.4652
UK058	UK058_107	NA	1720	16380	44.1	0.841603	NA	NA	2.90613	2.02454	0.1153	6.79101	NA	NA	5.47035	7.08637	0.3441	2.02454	0.054494	NA	NA	1884.58	122.557	123.773	1906.36	33.4119	40.1696	1895.95	60.9062	62.5506	NA	NA	NA	75.8042	-1.15603		1884.58	122.557	6.50317	123.773	6.50049
UK058	UK058_259	NA	3430	32140	150.3	0.842017	NA	NA	3.04136	1.98465	0.1153	6.14819	NA	NA	5.22712	6.46058	0.3288	1.98465	0.48384	NA	NA	1884.58	110.912	112.252	1832.56	31.6575	38.2978	1857.05	55.1192	56.9041	NA	NA	NA	31.7261	2.76001		1884.58	110.912	5.88526	112.252	6.12074
UK058	UK058_190	NA	14460	135500	136.1	0.938621	NA	NA	3.12598	1.97391	0.1159	5.02756	NA	NA	5.1121	5.40118	0.3199	1.97391	0.41978	NA	NA	1893.92	90.5406	92.1699	1789.24	30.8405	37.3738	1838.12	45.9011	48.0123	NA	NA	NA	2.60096	5.52704		1893.92	90.5406	4.7806	92.1699	5.12765
UK058	UK058_8	NA	4400	40850	106	0.909091	NA	NA	2.95858	1.98786	0.1162	5.89174	NA	NA	5.41532	6.21805	0.338	1.98786	0.41054	NA	NA	1898.57	106.092	107.487	1877.04	32.3718	39.1419	1887.28	53.3445	55.2067	NA	NA	NA	68.1511	1.13381		1898.57	106.092	5.58801	107.487	5.72224
UK058	UK058_97	NA	5870	54700	75.6	0.882147	NA	NA	2.95946	1.96107	0.1167	5.66626	NA	NA	5.43701	5.99602	0.3379	1.96107	0.37978	NA	NA	1906.28	101.925	103.373	1876.56	31.9285	38.7733	1890.71	51.4684	53.398	NA	NA	NA	56.6743	1.55922		1906.28	101.925	5.3468	103.373	5.50207
UK058	UK058_125	NA	2980	27700	19.5	0.866667	NA	NA	2.9656	1.99196	0.117	6.25334	NA	NA	5.4397	6.56294	0.3372	1.99196	0.24135	NA	NA	1910.89	112.461	113.775	1873.19	32.3813	39.1278	1891.13	56.3486	58.1178	NA	NA	NA	53.6794	1.97326		1910.89	112.461	5.88527	113.775	6.0636
UK058	UK058_241	NA	2930	27400	59.9	0.846045	NA	NA	2.95596	2.04213	0.1173	6.23632	NA	NA	5.47144	6.56216	0.3383	2.04213	0.49074	NA	NA	1915.49	112.093	113.409	1878.49	33.2777	39.9024	1896.12	56.3928	58.1638	NA	NA	NA	47.8514	1.93171		1915.49	112.093	5.85191	113.409	6.03336
UK058	UK058_161	NA	741	6770	3.91	0.777336	NA	NA	3.18269	2.13925	0.1178	7.85759	NA	NA	5.10332	8.14359	0.3142	2.13925	0.26554	NA	NA	1923.12	141.259	142.309	1761.34	32.9707	38.9965	1836.66	69.2477	70.6689	NA	NA	NA	3.22226	8.41208		1923.12	141.259	7.34532	142.309	8.05003
UK058	UK058_281	NA	863	7880	31.2	0.878873	NA	NA	2.87853	2.13818	0.1186	7.66236	NA	NA	5.68088	7.95509	0.3474	2.13818	0.1385	NA	NA	1935.24	137.531	138.605	1922.17	35.5386	42.0397	1928.47	68.7893	70.268	NA	NA	NA	86.304	0.67524		1935.24	137.531	7.10668	138.605	7.2068
UK058	UK058_252	NA	6240	57600	69.3	0.891892	NA	NA	2.83688	1.97498	0.1188	5.65165	NA	NA	5.774	5.98679	0.3525	1.97498	0.46941	NA	NA	1938.25	101.276	102.722	1946.53	33.1823	40.2047	1942.52	51.8601	53.8103	NA	NA	NA	86.3358	-0.426736		1938.25	101.276	5.22512	102.722	5.27868
UK058	UK058_52	NA	3550	32920	42.1	0.901499	NA	NA	2.86451	1.99008	0.119	6.07686	NA	NA	5.72794	6.39442	0.3491	1.99008	0.35786	NA	NA	1941.26	108.883	110.229	1930.3	33.197	40.1254	1935.59	55.3321	57.1605	NA	NA	NA	84.2944	0.564774		1941.26	108.883	5.60886	110.229	5.70804
UK058	UK058_31	NA	6610	59600	68.3	0.920485	NA	NA	2.75786	1.98095	0.1223	5.60507	NA	NA	6.11442	5.94483	0.3626	1.98095	0.45023	NA	NA	1990.05	99.8302	101.279	1994.49	33.9825	41.1347	1992.31	51.9235	53.9032	NA	NA	NA	92.6907	-0.222976		1990.05	99.8302	5.01647	101.279	5.07883
UK058	UK058_208	NA	3750	31200	42.8	0.949002	NA	NA	2.65393	2.00948	0.1297	6.08572	NA	NA	6.73833	6.4089	0.3768	2.00948	0.12252	NA	NA	2093.9	107.135	108.456	2061.32	35.4525	42.7216	2077.66	56.7244	58.5908	NA	NA	NA	60.5752	1.55621		2093.9	107.135	5.11653	108.456	5.25108
UK058	UK058_88	NA	2998	24910	89.3	1.05931	NA	NA	2.62398	1.9867	0.1301	6.25723	NA	NA	6.83624	6.56506	0.3811	1.9867	0.24274	NA	NA	2099.31	110.098	111.383	2081.42	35.3402	42.7389	2090.43	58.2175	60.0445	NA	NA	NA	76.561	0.852346		2099.31	110.098	5.24448	111.383	5.34657
UK058	UK058_87	NA	2632	21940	67.8	1.06436	NA	NA	2.61301	1.98931	0.131	6.37265	NA	NA	6.91243	6.67593	0.3827	1.98931	0.44136	NA	NA	2111.41	111.984	113.244	2088.88	35.4941	42.9072	2100.25	59.2865	61.0868	NA	NA	NA	67.4766	1.06703		2111.41	111.984	5.30373	113.244	5.41803
UK058	UK058_59	NA	4570	38000	21.8	1.05365	NA	NA	2.63435	1.97475	0.1318	5.94057	NA	NA	6.89831	6.2602	0.3796	1.97475	0.21605	NA	NA	2122.09	104.24	105.588	2074.41	35.0274	42.4419	2098.44	55.5725	57.4872	NA	NA	NA	41.781	2.24641		2122.09	104.24	4.91217	105.588	5.07679
UK058	UK058_7	NA	15830	104600	130.4	1.21755	NA	NA	2.10748	1.95134	0.167	4.95046	NA	NA	10.9258	5.32116	0.4745	1.95134	0.30853	NA	NA	2527.8	83.191	84.7342	2503.26	40.4807	49.238	2516.84	49.539	51.8855	NA	NA	NA	61.2258	0.97057		2527.8	83.191	3.29104	84.7342	3.37849
UK058	UK058_170	NA	15620	98400	123.2	1.28467	NA	NA	2.0016	1.95459	0.1742	4.96551	NA	NA	11.9997	5.33635	0.4996	1.95459	0.40562	NA	NA	2598.41	82.8701	84.3981	2612.08	41.9785	51.0323	2604.39	50.0568	52.4148	NA	NA	NA	76.0799	-0.525952		2598.41	82.8701	3.18926	84.3981	3.23449
UK058	UK058_67	NA	9800	58800	155	1.33047	NA	NA	1.95656	2.06764	0.1836	5.40204	NA	NA	12.9384	5.78422	0.5111	2.06764	0.56085	NA	NA	2685.66	89.4256	90.8212	2661.32	45.0831	53.8558	2675.17	54.5707	56.7668	NA	NA	NA	56.0343	0.906188		2685.66	89.4256	3.32974	90.8212	3.40764
UK058	UK058_214	NA	4460	25410	83.2	1.35948	NA	NA	1.92678	2.02048	0.1918	5.92273	NA	NA	13.7252	6.25788	0.519	2.02048	0.15766	NA	NA	2757.66	97.4153	98.6823	2694.94	44.5029	53.5372	2730.93	59.2936	61.3386	NA	NA	NA	29.5182	2.2744		2757.66	97.4153	3.53254	98.6823	3.64593
UK058	UK058_173	NA	8070	45300	52.9	1.33586	NA	NA	1.90006	1.99168	0.1964	5.44535	NA	NA	14.252	5.79816	0.5263	1.99168	0.40659	NA	NA	2796.51	89.225	90.5956	2725.84	44.273	53.4997	2766.63	55.0674	57.2731	NA	NA	NA	14.0458	2.527		2796.51	89.225	3.19058	90.5956	3.30857
UK058	UK058_121	NA	2103	11330	9.39	1.29696	NA	NA	1.90114	2.2045	0.203	6.612	NA	NA	14.7226	6.96982	0.526	2.2045	0.29874	NA	NA	2850.47	107.881	109.009	2724.58	48.9856	57.4547	2797.48	66.3635	68.2157	NA	NA	NA	3.98137	4.41657		2850.47	107.881	3.78466	109.009	3.97258
UK058	UK058_99	NA	17130	86700	110.6	1.34714	NA	NA	1.7838	1.964	0.2208	4.98573	NA	NA	17.0669	5.35862	0.5606	1.964	0.25086	NA	NA	2986.53	80.3204	81.7894	2869.11	45.4809	55.2047	2938.6	51.4429	53.8467	NA	NA	NA	2.08432	3.93185		2986.53	80.3204	2.68942	81.7894	2.82368
UK058	UK058_86	NA	15380	73200	180.7	1.57541	NA	NA	1.63613	1.95859	0.2306	4.97771	NA	NA	19.4332	5.34917	0.6112	1.95859	0.45167	NA	NA	3056.22	79.72	81.1827	3074.81	47.8965	58.1884	3063.57	51.7011	54.1254	NA	NA	NA	66.6576	-0.608249		3056.22	79.72	2.60845	81.1827	2.64447
UK058	UK058_4	NA	339	4480	9.95	0.512887	NA	NA	6.30517	2.24496	0.084	9.00953	NA	NA	1.83689	9.28502	0.1586	2.24496	0.27026	NA	NA	1292.55	176.017	177.016	948.992	19.8106	23.1219	1058.75	61.1192	62.0856	NA	NA	NA	0.0401226	26.58
UK058	UK058_10	NA	11990	61200	261.1	1.43936	NA	NA	1.82116	1.99661	0.2164	5.14846	NA	NA	16.3836	5.52206	0.5491	1.99661	0.50813	NA	NA	2954.1	83.1793	84.607	2821.43	45.6237	55.0891	2899.46	52.8924	55.2231	NA	NA	NA	0.182405	4.49094
UK058	UK058_22	NA	212	4150	3.92	0.0471721	NA	NA	59.5948	2.12369	0.0563	10.0257	NA	NA	0.130257	10.2481	0.01678	2.12369	0.034308	NA	NA	NA	NA	NA	107.273	2.25931	2.67781	124.329	11.9927	12.1483	NA	NA	NA	0.525996	76.8916
UK058	UK058_23	NA	3390	30500	1.15	0.631868	NA	NA	3.81825	2.12648	0.1211	6.24918	NA	NA	4.37301	6.60107	0.2619	2.12648	0.50838	NA	NA	1972.49	111.571	112.876	1499.56	28.4507	33.7081	1707.25	54.6041	56.2989	NA	NA	NA	1.74825e-13	23.9767
UK058	UK058_30	NA	11550	68200	125.9	0.844966	NA	NA	2.05044	2.02853	0.182	5.19812	NA	NA	12.2384	5.57991	0.4877	2.02853	0.6406	NA	NA	2671.18	86.1595	87.6106	2560.72	42.8689	51.5083	2622.86	52.4242	54.6876	NA	NA	NA	0.314018	4.13534
UK058	UK058_40	NA	354	7820	17.05	0.192873	NA	NA	14.9925	2.09768	0.0478	9.19977	NA	NA	0.439597	9.43589	0.0667	2.09768	-0.081726	NA	NA	NA	NA	NA	416.243	8.45552	10.0578	369.968	29.2649	29.7122	NA	NA	NA	0.244021	-365.691
UK058	UK058_61	NA	572	10890	26.8	0.0603604	NA	NA	52.3013	2.32656	0.0582	8.16127	NA	NA	0.153431	8.48642	0.01912	2.32656	0.36217	NA	NA	NA	NA	NA	122.092	2.81381	3.2539	144.936	11.4629	11.679	NA	NA	NA	0.00275685	77.2767
UK058	UK058_63	NA	319	5490	6.15	0.108275	NA	NA	28.6615	2.11938	0.0653	9.19619	NA	NA	0.314134	9.43725	0.03489	2.11938	0.34541	NA	NA	NA	NA	NA	221.081	4.6061	5.46252	277.38	22.91	23.26	NA	NA	NA	4.9785e-05	71.8015
UK058	UK058_73	NA	2902	41640	18.7	0.503365	NA	NA	6.55738	1.98029	0.0763	6.28434	NA	NA	1.60434	6.58897	0.1525	1.98029	0.44874	NA	NA	1102.95	125.93	127.388	914.962	16.8918	20.4491	971.903	41.2367	42.5201	NA	NA	NA	0.270203	17.0443
UK058	UK058_105	NA	290	5560	7.3	0.0705996	NA	NA	39.2157	2.43059	0.0569	10.0383	NA	NA	0.200057	10.3284	0.0255	2.43059	0.37105	NA	NA	NA	NA	NA	162.323	3.89613	4.45766	185.174	17.4846	17.7079	NA	NA	NA	0.602218	66.7139
UK058	UK058_113	NA	904	18080	21.3	0.0596973	NA	NA	51.7866	2.0823	0.0554	7.57526	NA	NA	0.1475	7.85624	0.01931	2.0823	0.21261	NA	NA	NA	NA	NA	123.294	2.54295	3.03138	139.703	10.2542	10.4794	NA	NA	NA	0.116453	71.2201
UK058	UK058_119	NA	4040	57200	56.6	0.451716	NA	NA	6.22665	2.26672	0.0768	5.9921	NA	NA	1.70062	6.4065	0.1606	2.26672	0.73577	NA	NA	1116	119.818	121.342	960.11	20.22	23.5397	1008.77	40.9856	42.3336	NA	NA	NA	0.144553	13.9687
UK058	UK058_232	NA	9850	88200	65.7	0.9125	NA	NA	3.0021	2.17611	0.1244	5.27959	NA	NA	5.71342	5.71048	0.3331	2.17611	0.76181	NA	NA	2020.27	93.6885	95.2189	1853.39	35.0523	41.2595	1933.4	49.3852	51.4224	NA	NA	NA	0.000206616	8.26048
UK058	UK058_240	NA	278	4340	7.24	0.161247	NA	NA	26.3227	2.21699	0.0649	9.56648	NA	NA	0.33995	9.82001	0.03799	2.21699	0.12045	NA	NA	NA	NA	NA	240.362	5.23068	6.12555	297.134	25.3022	25.6594	NA	NA	NA	0.00116122	68.8285
UK058	UK058_264	NA	309	5510	12.5	0.195925	NA	NA	14.7275	2.14837	0.0647	9.18236	NA	NA	0.605725	9.43034	0.0679	2.14837	0.21882	NA	NA	NA	NA	NA	423.491	8.80574	10.4025	480.86	36.1364	36.6896	NA	NA	NA	0.155145	44.6124
UK058	UK058_268	NA	91	1564	1.59	0.0822981	NA	NA	36.3108	2.43179	0.0621	11.6254	NA	NA	0.235807	11.877	0.02754	2.43179	0.056272	NA	NA	NA	NA	NA	175.134	4.20155	4.80653	214.981	23.0153	23.238	NA	NA	NA	0.0731315	74.1521
UK058	UK058_287	NA	648	12930	6.2	0.0943683	NA	NA	39.0016	2.24589	0.0576	8.41493	NA	NA	0.20363	8.70948	0.02564	2.24589	0.54295	NA	NA	NA	NA	NA	163.203	3.61934	4.22384	188.193	14.9624	15.2304	NA	NA	NA	0.0223856	68.2843
University of Calgary, Centre for Pure and Applied Tectonics and Thermochronology
Lower Sandstone, Flood Mb ( 47.380408°, -111.438681°)		f206c	207Pb CPS	206Pb CPS	U (ppm)1	U/Th	206Pb/204Pb	1σ %	Data for Tera-Wasserburg plot2				208Pb/206Pb	2σx (%)	Data for Wetherill plot2					208Pb/232Th	2σx (%)	Dates									208Pb/232Th	2σx (ABS)	2σtotal (ABS)	Prob. Conc. (%)	% conc3	Comments	Accepted Dates4
Sample	Spot								238U/206Pb	2σx (%)	207Pb/206Pb	2σx (%)			207Pb/235Pb	2σx (%)	206Pb/238U	2σx (%)	Rho			207Pb/206Pb	2σx (ABS)	2σtotal (ABS)	206Pb/238U	2σx (ABS)	2σtotal (ABS)	207Pb/235Pb	2σx (ABS)	2σtotal (ABS)							Date (Ma)	2σx (ABS)	2σx (%)	2σtotal (ABS)	2σtotal (%)
UK057	UK057_6	NA	377	7510	10.76	0.0465801	NA	NA	60.1323	2.11218	0.0516	8.70026	NA	NA	0.118316	8.95298	0.01663	2.11218	0.19417	NA	NA	NA	NA	NA	106.322	2.2273	2.64403	113.544	9.6181	9.78119	NA	NA	NA	12.7393	NA		106.322	2.2273	2.09486	2.64403	2.48536
UK057	UK057_129	NA	486	9980	19.9	0.0478365	NA	NA	58.6166	2.04908	0.0499	8.17966	NA	NA	0.117376	8.43241	0.01706	2.04908	0.097618	NA	NA	NA	NA	NA	109.048	2.21569	2.65402	112.691	8.99445	9.16619	NA	NA	NA	42.1649	NA		109.048	2.21569	2.03184	2.65402	2.43089
UK057	UK057_61	NA	307	5930	7.38	0.0466203	NA	NA	58.5138	2.13353	0.0528	8.87357	NA	NA	0.124416	9.12645	0.01709	2.13353	0.11262	NA	NA	NA	NA	NA	109.238	2.311	2.73545	119.068	10.2541	10.4215	NA	NA	NA	5.63352	NA		109.238	2.311	2.11556	2.73545	2.49852
UK057	UK057_135	NA	560	12030	12.22	0.0489583	NA	NA	58.1395	2.05493	0.0484	8.10168	NA	NA	0.114782	8.35823	0.0172	2.05493	-0.082615	NA	NA	NA	NA	NA	109.936	2.23995	2.68077	110.331	8.73856	8.90836	NA	NA	NA	93.1548	NA		109.936	2.23995	2.03751	2.68077	2.4378
UK057	UK057_16	NA	314	6250	3.83	0.0445349	NA	NA	57.9039	2.13035	0.051	9.22556	NA	NA	0.121441	9.46833	0.01727	2.13035	0.068778	NA	NA	NA	NA	NA	110.379	2.33144	2.76082	116.377	10.4113	10.5693	NA	NA	NA	25.5068	NA		110.379	2.33144	2.11221	2.76082	2.49664
UK057	UK057_220	NA	275	5660	6.32	0.0552931	NA	NA	57.7701	2.12965	0.0511	9.91095	NA	NA	0.121961	10.1372	0.01731	2.12965	-0.14057	NA	NA	NA	NA	NA	110.633	2.33599	2.76647	116.848	11.1894	11.3377	NA	NA	NA	29.127	NA		110.633	2.33599	2.11148	2.76647	2.49138
UK057	UK057_258	NA	301	6000	6.16	0.0478632	NA	NA	57.241	2.29715	0.0544	9.37248	NA	NA	0.131037	9.64989	0.01747	2.29715	0.068714	NA	NA	NA	NA	NA	111.646	2.5426	2.94981	125.029	11.3524	11.5183	NA	NA	NA	2.02918	NA		111.646	2.5426	2.27737	2.94981	2.6316
UK057	UK057_260	NA	204	4400	5.48	0.0473639	NA	NA	57.1755	2.1562	0.0486	10.5951	NA	NA	0.1172	10.8123	0.01749	2.1562	-0.01484	NA	NA	NA	NA	NA	111.773	2.38928	2.81962	112.53	11.5176	11.6519	NA	NA	NA	89.7893	NA		111.773	2.38928	2.13762	2.81962	2.52188
UK057	UK057_8	NA	295	6750	5.65	0.0463115	NA	NA	57.1429	2.177	0.046	9.10496	NA	NA	0.110993	9.3616	0.0175	2.177	0.12546	NA	NA	NA	NA	NA	111.837	2.41368	2.84077	106.874	9.49682	9.64421	NA	NA	NA	29.5035	NA		111.837	2.41368	2.15822	2.84077	2.54384
UK057	UK057_205	NA	90	2215	1.28	0.0395062	NA	NA	56.7537	2.31819	0.0417	12.9176	NA	NA	0.101308	13.124	0.01762	2.31819	-0.11756	NA	NA	NA	NA	NA	112.597	2.58754	2.99497	97.9829	12.2589	12.3561	NA	NA	NA	2.18013	NA		112.597	2.58754	2.29806	2.99497	2.6823
UK057	UK057_278	NA	186	3940	2.93	0.049577	NA	NA	56.7215	2.25411	0.052	11.1057	NA	NA	0.126403	11.3322	0.01763	2.25411	-0.11199	NA	NA	NA	NA	NA	112.66	2.51742	2.93503	120.86	12.9131	13.0502	NA	NA	NA	22.3663	NA		112.66	2.51742	2.23453	2.93503	2.59485
UK057	UK057_261	NA	359	7140	5.4	0.0447761	NA	NA	56.6572	2.17372	0.0546	8.83627	NA	NA	0.132874	9.09971	0.01765	2.17372	0.11844	NA	NA	NA	NA	NA	112.787	2.43035	2.86159	126.677	10.8376	11.0155	NA	NA	NA	1.07622	NA		112.787	2.43035	2.15482	2.86159	2.53001
UK057	UK057_67	NA	440	9960	10.59	0.0500946	NA	NA	56.243	2.07138	0.0462	8.63353	NA	NA	0.11326	8.87854	0.01778	2.07138	-0.052749	NA	NA	NA	NA	NA	113.61	2.33268	2.78508	108.943	9.17195	9.33007	NA	NA	NA	32.9004	NA		113.61	2.33268	2.05323	2.78508	2.4587
UK057	UK057_154	NA	115	2740	2.26	0.0489177	NA	NA	56.243	2.339	0.0453	11.7503	NA	NA	0.111053	11.9809	0.01778	2.339	0.25107	NA	NA	NA	NA	NA	113.61	2.63406	3.04196	106.928	12.1601	12.2756	NA	NA	NA	25.4919	NA		113.61	2.63406	2.31851	3.04196	2.67634
UK057	UK057_12	NA	290	6300	5.71	0.0489289	NA	NA	55.8036	2.0699	0.049	9.13916	NA	NA	0.12107	9.37063	0.01792	2.0699	-0.024101	NA	NA	NA	NA	NA	114.497	2.34905	2.80522	116.041	10.2758	10.435	NA	NA	NA	77.0803	NA		114.497	2.34905	2.05163	2.80522	2.44825
UK057	UK057_119	NA	476	10260	10.02	0.0527368	NA	NA	55.7103	2.11022	0.0495	8.42852	NA	NA	0.12251	8.68867	0.01795	2.11022	0.24381	NA	NA	NA	NA	NA	114.687	2.39875	2.84832	117.345	9.62891	9.80218	NA	NA	NA	56.9674	NA		114.687	2.39875	2.09156	2.84832	2.48349
UK057	UK057_243	NA	233	4900	5.94	0.0580645	NA	NA	55.6793	2.26858	0.0503	9.70762	NA	NA	0.124559	9.96917	0.01796	2.26858	0.1043	NA	NA	NA	NA	NA	114.75	2.58017	3.00314	119.197	11.2124	11.366	NA	NA	NA	42.9751	NA		114.75	2.58017	2.24851	3.00314	2.61422
UK057	UK057_145	NA	367	8170	8.6	0.0472527	NA	NA	55.5864	2.09267	0.0462	8.80595	NA	NA	0.114597	9.05119	0.01799	2.09267	0.015858	NA	NA	NA	NA	NA	114.94	2.384	2.83773	110.162	9.44941	9.60621	NA	NA	NA	32.3956	NA		114.94	2.384	2.07412	2.83773	2.47473
UK057	UK057_76	NA	493	11500	6.9	0.0442308	NA	NA	55.4631	2.13631	0.048	8.80061	NA	NA	0.119327	9.05619	0.01803	2.13631	-0.15799	NA	NA	NA	NA	NA	115.193	2.43903	2.88592	114.462	9.80326	9.96575	NA	NA	NA	88.877	NA		115.193	2.43903	2.11734	2.88592	2.50669
UK057	UK057_38	NA	248	5840	5.07	0.0547516	NA	NA	55.371	2.25353	0.0457	9.77793	NA	NA	0.113798	10.0343	0.01806	2.25353	-0.032342	NA	NA	NA	NA	NA	115.383	2.57706	3.00478	109.434	10.4102	10.551	NA	NA	NA	26.954	NA		115.383	2.57706	2.23348	3.00478	2.6129
UK057	UK057_231	NA	256	5140	3.84	0.0550933	NA	NA	55.2181	2.19546	0.0551	9.39366	NA	NA	0.137585	9.64681	0.01811	2.19546	0.050497	NA	NA	NA	NA	NA	115.7	2.51749	2.95605	130.891	11.8473	12.0206	NA	NA	NA	1.18353	NA		115.7	2.51749	2.17588	2.95605	2.54397
UK057	UK057_137	NA	531	11210	14.02	0.0497163	NA	NA	55.1572	2.13459	0.0494	7.99387	NA	NA	0.123488	8.27396	0.01813	2.13459	0.21532	NA	NA	NA	NA	NA	115.827	2.45035	2.89997	118.23	9.23449	9.41757	NA	NA	NA	59.4976	NA		115.827	2.45035	2.11553	2.89997	2.50301
UK057	UK057_130	NA	92	1686	1.43	0.0428144	NA	NA	55.1268	3.07743	0.055	16.1708	NA	NA	0.137563	16.461	0.01814	3.07743	-0.079363	NA	NA	NA	NA	NA	115.89	3.53457	3.86024	130.871	20.2148	20.3168	NA	NA	NA	15.237	NA		115.89	3.53457	3.04994	3.86024	3.31324
UK057	UK057_107	NA	226	4340	2.63	0.0519763	NA	NA	55.0661	2.25065	0.0526	9.7226	NA	NA	0.131705	9.9797	0.01816	2.25065	0.16	NA	NA	NA	NA	NA	116.017	2.58777	3.01828	125.629	11.7933	11.9545	NA	NA	NA	10.082	NA		116.017	2.58777	2.23051	3.01828	2.59883
UK057	UK057_211	NA	209	4750	5.05	0.0490768	NA	NA	55.0661	2.26255	0.0478	9.9312	NA	NA	0.119686	10.1857	0.01816	2.26255	0.060965	NA	NA	NA	NA	NA	116.017	2.60145	3.03002	114.788	11.0557	11.2008	NA	NA	NA	82.6237	NA		116.017	2.60145	2.24231	3.03002	2.61282
UK057	UK057_97	NA	437	9560	6.83	0.0484397	NA	NA	55.0358	2.21595	0.0466	8.66705	NA	NA	0.116746	8.94585	0.01817	2.21595	0.26276	NA	NA	NA	NA	NA	116.08	2.54925	2.98576	112.118	9.49624	9.65752	NA	NA	NA	38.618	NA		116.08	2.54925	2.19611	2.98576	2.57233
UK057	UK057_72	NA	997	20630	16.9	0.0529781	NA	NA	54.9753	2.05313	0.0503	7.48494	NA	NA	0.126154	7.76142	0.01819	2.05313	0.30116	NA	NA	NA	NA	NA	116.207	2.36449	2.83057	120.636	8.82848	9.02713	NA	NA	NA	29.4	NA		116.207	2.36449	2.03473	2.83057	2.43675
UK057	UK057_60	NA	143	3040	2.41	0.0561772	NA	NA	54.6448	2.35931	0.0514	10.9953	NA	NA	0.129693	11.2456	0.0183	2.35931	-0.12633	NA	NA	NA	NA	NA	116.903	2.73325	3.14973	123.822	13.1097	13.251	NA	NA	NA	31.4806	NA		116.903	2.73325	2.33805	3.14973	2.68426
UK057	UK057_55	NA	572	11370	9.08	0.0518857	NA	NA	54.3478	2.14877	0.0506	8.41046	NA	NA	0.128372	8.68061	0.0184	2.14877	-0.033285	NA	NA	NA	NA	NA	117.536	2.50269	2.95635	122.634	10.0279	10.2087	NA	NA	NA	32.8722	NA		117.536	2.50269	2.1293	2.95635	2.5082
UK057	UK057_48	NA	322	6190	4.87	0.0532823	NA	NA	53.7634	2.11806	0.0532	9.01544	NA	NA	0.136435	9.2609	0.0186	2.11806	-0.12968	NA	NA	NA	NA	NA	118.802	2.49325	2.95736	129.864	11.2897	11.4687	NA	NA	NA	6.3649	NA		118.802	2.49325	2.09867	2.95736	2.47337
UK057	UK057_150	NA	597	12600	18	0.054315	NA	NA	52.7704	2.06683	0.0499	7.9843	NA	NA	0.13038	8.24747	0.01895	2.06683	0.32433	NA	NA	NA	NA	NA	121.017	2.47788	2.96037	124.439	9.65941	9.85213	NA	NA	NA	45.5694	NA		121.017	2.47788	2.04755	2.96037	2.44761
UK057	UK057_156	NA	916	18890	26.2	0.0544699	NA	NA	52.5486	2.06607	0.0511	7.51883	NA	NA	0.134079	7.79753	0.01903	2.06607	0.04809	NA	NA	NA	NA	NA	121.523	2.48723	2.97187	127.756	9.36088	9.56958	NA	NA	NA	19.3827	NA		121.523	2.48723	2.04672	2.97187	2.43867
UK057	UK057_63	NA	666	13980	32.4	0.0509434	NA	NA	52.0291	2.07121	0.0495	7.95121	NA	NA	0.131178	8.21654	0.01922	2.07121	0.011807	NA	NA	NA	NA	NA	122.724	2.51783	3.00621	125.155	9.67523	9.86971	NA	NA	NA	62.6108	NA		122.724	2.51783	2.05161	3.00621	2.44662
UK057	UK057_77	NA	221	4460	4.36	0.0600551	NA	NA	49.776	2.23301	0.0506	9.74702	NA	NA	0.140162	9.99953	0.02009	2.23301	0.089192	NA	NA	NA	NA	NA	128.225	2.83498	3.31356	133.189	12.4824	12.6523	NA	NA	NA	42.9995	NA		128.225	2.83498	2.21095	3.31356	2.58112
UK057	UK057_295	NA	367	8140	10	0.0621118	NA	NA	45.3721	2.14146	0.0496	8.89101	NA	NA	0.150728	9.14527	0.02204	2.14146	0.18347	NA	NA	NA	NA	NA	140.536	2.97695	3.51997	142.555	12.1638	12.3615	NA	NA	NA	73.6341	NA		140.536	2.97695	2.11828	3.51997	2.50413
UK057	UK057_37	NA	1610	33410	57.2	0.0562992	NA	NA	44.4247	2.12003	0.0483	7.11775	NA	NA	0.149908	7.42677	0.02251	2.12003	0.30544	NA	NA	NA	NA	NA	143.5	3.00863	3.56771	141.83	9.83115	10.0725	NA	NA	NA	72.1137	NA		143.5	3.00863	2.09661	3.56771	2.48622
UK057	UK057_152	NA	910	19570	22.2	0.0625352	NA	NA	43.4972	2.04246	0.0493	7.49548	NA	NA	0.156274	7.76878	0.02299	2.04246	-0.053754	NA	NA	NA	NA	NA	146.525	2.95897	3.54782	147.437	10.6617	10.9011	NA	NA	NA	87.0948	NA		146.525	2.95897	2.01943	3.54782	2.42006
UK057	UK057_178	NA	610	14400	34.4	0.0688	NA	NA	42.7533	2.24452	0.0476	8.33003	NA	NA	0.153511	8.62712	0.02339	2.24452	0.26834	NA	NA	NA	NA	NA	149.045	3.30698	3.85993	145.007	11.6582	11.871	NA	NA	NA	47.1197	NA		149.045	3.30698	2.21877	3.85993	2.59012
UK057	UK057_255	NA	1256	25600	59.4	0.0660734	NA	NA	41.9111	2.0331	0.0531	7.05363	NA	NA	0.174689	7.34079	0.02386	2.0331	0.26559	NA	NA	NA	NA	NA	152.005	3.05426	3.66723	163.48	11.0849	11.3634	NA	NA	NA	3.27211	NA		152.005	3.05426	2.00931	3.66723	2.4122
UK057	UK057_147	NA	728	15350	23.3	0.0622995	NA	NA	41.876	2.24298	0.0488	8.80978	NA	NA	0.160678	9.09083	0.02388	2.24298	0.44564	NA	NA	NA	NA	NA	152.131	3.37233	3.93693	151.296	12.7791	12.9893	NA	NA	NA	88.6193	NA		152.131	3.37233	2.21672	3.93693	2.58704
UK057	UK057_203	NA	306	6270	8.9	0.068567	NA	NA	41.6146	2.17362	0.0516	9.07804	NA	NA	0.170964	9.33464	0.02403	2.17362	-0.13532	NA	NA	NA	NA	NA	153.075	3.28808	3.87157	160.255	13.8393	14.0554	NA	NA	NA	32.8454	NA		153.075	3.28808	2.14802	3.87157	2.51991
UK057	UK057_120	NA	586	11930	11.55	0.0702982	NA	NA	41.5282	2.05087	0.0521	8.17359	NA	NA	0.17298	8.42696	0.02408	2.05087	-0.038568	NA	NA	NA	NA	NA	153.39	3.1087	3.72271	162.002	12.6191	12.8604	NA	NA	NA	19.0631	NA		153.39	3.1087	2.02666	3.72271	2.41822
UK057	UK057_73	NA	1033	21300	32.7	0.0661943	NA	NA	41.3907	2.05543	0.0529	7.38787	NA	NA	0.176219	7.66847	0.02416	2.05543	0.046369	NA	NA	NA	NA	NA	153.894	3.12573	3.74059	164.802	11.666	11.9349	NA	NA	NA	6.88989	NA		153.894	3.12573	2.03109	3.74059	2.42106
UK057	UK057_95	NA	919	18580	34.2	0.0689516	NA	NA	41.3565	2.036	0.0499	7.53389	NA	NA	0.166364	7.80416	0.02418	2.036	-0.013611	NA	NA	NA	NA	NA	154.02	3.09868	3.71893	156.258	11.3031	11.5547	NA	NA	NA	70.3702	NA		154.02	3.09868	2.01187	3.71893	2.41204
UK057	UK057_127	NA	644	12530	8.29	0.0739518	NA	NA	41.1353	2.08173	0.0529	7.89346	NA	NA	0.177314	8.16335	0.02431	2.08173	0.3449	NA	NA	NA	NA	NA	154.838	3.1849	3.79694	165.746	12.4845	12.7387	NA	NA	NA	6.53359	NA		154.838	3.1849	2.05692	3.79694	2.45677
UK057	UK057_183	NA	284	6400	12.94	0.0705177	NA	NA	41.1184	2.09357	0.0475	9.33503	NA	NA	0.159279	9.56691	0.02432	2.09357	0.038913	NA	NA	NA	NA	NA	154.901	3.2043	3.81368	150.072	13.3474	13.5458	NA	NA	NA	47.6802	NA		154.901	3.2043	2.06861	3.81368	2.46561
UK057	UK057_94	NA	932	19600	35	0.0651769	NA	NA	41.0341	2.03506	0.0527	7.43133	NA	NA	0.177079	7.70494	0.02437	2.03506	0.23143	NA	NA	NA	NA	NA	155.215	3.121	3.74625	165.544	11.7701	12.0388	NA	NA	NA	7.28028	NA		155.215	3.121	2.01075	3.74625	2.41219
UK057	UK057_291	NA	764	16180	25.2	0.0663158	NA	NA	41.0341	2.02648	0.0502	7.9808	NA	NA	0.168679	8.23406	0.02437	2.02648	-0.011743	NA	NA	NA	NA	NA	155.215	3.10784	3.7353	158.272	12.0678	12.3094	NA	NA	NA	62.519	NA		155.215	3.10784	2.00227	3.7353	2.40347
UK057	UK057_249	NA	547	12560	24.9	0.0709402	NA	NA	40.9333	2.03926	0.0475	8.24346	NA	NA	0.159999	8.49195	0.02443	2.03926	0.13421	NA	NA	NA	NA	NA	155.593	3.13496	3.76064	150.703	11.8937	12.1177	NA	NA	NA	40.9513	NA		155.593	3.13496	2.01485	3.76064	2.4196
UK057	UK057_113	NA	484	9740	15.3	0.0686099	NA	NA	40.8998	2.14513	0.051	8.31235	NA	NA	0.171929	8.58468	0.02445	2.14513	0.21337	NA	NA	NA	NA	NA	155.719	3.30034	3.90046	161.092	12.7887	13.0244	NA	NA	NA	39.1419	NA		155.719	3.30034	2.11943	3.90046	2.5038
UK057	UK057_2	NA	741	14070	23.06	0.062663	NA	NA	40.833	2.05838	0.0544	7.7686	NA	NA	0.183691	8.03667	0.02449	2.05838	0.2533	NA	NA	NA	NA	NA	155.971	3.17195	3.79426	171.232	12.6642	12.9302	NA	NA	NA	1.34031	NA		155.971	3.17195	2.03368	3.79426	2.43309
UK057	UK057_188	NA	556	11930	20.8	0.069103	NA	NA	40.8163	2.07444	0.0488	8.26664	NA	NA	0.164849	8.52294	0.0245	2.07444	0.095622	NA	NA	NA	NA	NA	156.033	3.19796	3.81649	154.939	12.2478	12.4768	NA	NA	NA	85.9356	NA		156.033	3.19796	2.04954	3.81649	2.44667
UK057	UK057_234	NA	1167	24730	45	0.0635593	NA	NA	40.8163	2.0389	0.0495	7.1711	NA	NA	0.167214	7.45532	0.0245	2.0389	0.25432	NA	NA	NA	NA	NA	156.033	3.14317	3.77069	156.998	10.8451	11.1094	NA	NA	NA	85.42	NA		156.033	3.14317	2.01442	3.77069	2.41643
UK057	UK057_274	NA	1034	23470	38.2	0.0684588	NA	NA	40.7997	2.03437	0.0471	7.32979	NA	NA	0.159172	7.60687	0.02451	2.03437	0.097122	NA	NA	NA	NA	NA	156.096	3.13744	3.76638	149.978	10.6064	10.8548	NA	NA	NA	25.4331	NA		156.096	3.13744	2.00994	3.76638	2.41832
UK057	UK057_96	NA	464	9200	12.3	0.0728673	NA	NA	40.7664	2.09767	0.0502	8.53999	NA	NA	0.169786	8.79384	0.02453	2.09767	-0.094212	NA	NA	NA	NA	NA	156.222	3.23763	3.85114	159.233	12.9607	13.1884	NA	NA	NA	65.9491	NA		156.222	3.23763	2.07245	3.85114	2.4615
UK057	UK057_253	NA	873	17400	27.3	0.0629032	NA	NA	40.7664	2.05305	0.0535	7.58093	NA	NA	0.180948	7.85401	0.02453	2.05305	0.18346	NA	NA	NA	NA	NA	156.222	3.16876	3.79342	168.876	12.2198	12.4884	NA	NA	NA	3.6794	NA		156.222	3.16876	2.02837	3.79342	2.42444
UK057	UK057_257	NA	632	13430	27	0.0666667	NA	NA	40.7664	2.07985	0.0511	7.91152	NA	NA	0.17283	8.18034	0.02453	2.07985	0.092789	NA	NA	NA	NA	NA	156.222	3.21014	3.82805	161.872	12.2407	12.4889	NA	NA	NA	36.1915	NA		156.222	3.21014	2.05485	3.82805	2.44657
UK057	UK057_160	NA	1231	27300	58.2	0.0677532	NA	NA	40.7332	2.07969	0.0473	7.12295	NA	NA	0.160108	7.42034	0.02455	2.07969	0.077805	NA	NA	NA	NA	NA	156.348	3.21244	3.83088	150.798	10.3988	10.6546	NA	NA	NA	29.5774	NA		156.348	3.21244	2.05467	3.83088	2.45622
UK057	UK057_250	NA	2100	44100	121.1	0.0647594	NA	NA	40.7332	2.06319	0.0516	6.59084	NA	NA	0.174664	6.90622	0.02455	2.06319	0.24388	NA	NA	NA	NA	NA	156.348	3.18695	3.80954	163.458	10.4274	10.7228	NA	NA	NA	16.1901	NA		156.348	3.18695	2.03837	3.80954	2.43444
UK057	UK057_246	NA	289	5830	8.8	0.0727273	NA	NA	40.7166	2.16548	0.05	9.22417	NA	NA	0.169317	9.47494	0.02456	2.16548	0.1517	NA	NA	NA	NA	NA	156.411	3.34629	3.94424	158.826	13.9316	14.1427	NA	NA	NA	72.7132	NA		156.411	3.34629	2.13942	3.94424	2.52088
UK057	UK057_268	NA	261	5740	12.5	0.0618812	NA	NA	40.7	2.29072	0.0507	9.7083	NA	NA	0.171757	9.97489	0.02457	2.29072	0.076389	NA	NA	NA	NA	NA	156.474	3.54123	4.11134	160.943	14.8472	15.0504	NA	NA	NA	55.2028	NA		156.474	3.54123	2.26314	4.11134	2.62468
UK057	UK057_10	NA	1240	25290	51.2	0.0678146	NA	NA	40.6669	2.14326	0.0501	7.61199	NA	NA	0.169863	7.90796	0.02459	2.14326	0.19016	NA	NA	NA	NA	NA	156.6	3.3159	3.91982	159.3	11.6594	11.9122	NA	NA	NA	63.9065	NA		156.6	3.3159	2.11744	3.91982	2.5019
UK057	UK057_106	NA	1157	24200	43.5	0.0709625	NA	NA	40.6339	2.06276	0.0505	7.26829	NA	NA	0.171358	7.55533	0.02461	2.06276	-0.016158	NA	NA	NA	NA	NA	156.726	3.1939	3.81807	160.597	11.2232	11.4895	NA	NA	NA	50.9468	NA		156.726	3.1939	2.03789	3.81807	2.43146
UK057	UK057_157	NA	455	9300	11.68	0.0720988	NA	NA	40.6174	2.10928	0.0514	8.66956	NA	NA	0.174483	8.92246	0.02462	2.10928	-0.11761	NA	NA	NA	NA	NA	156.788	3.26721	3.88006	163.302	13.46	13.6898	NA	NA	NA	36.0883	NA		156.788	3.26721	2.08384	3.88006	2.46673
UK057	UK057_219	NA	613	12320	26.4	0.0691099	NA	NA	40.4858	2.13488	0.0538	7.95243	NA	NA	0.183223	8.234	0.0247	2.13488	-0.059343	NA	NA	NA	NA	NA	157.292	3.31735	3.92592	170.83	12.9473	13.2064	NA	NA	NA	4.69991	NA		157.292	3.31735	2.10904	3.92592	2.48043
UK057	UK057_101	NA	1770	38000	78	0.0664395	NA	NA	40.4204	2.03327	0.0489	6.79893	NA	NA	0.166805	7.09645	0.02474	2.03327	0.2065	NA	NA	NA	NA	NA	157.543	3.16446	3.79944	156.643	10.3014	10.5781	NA	NA	NA	85.8819	NA		157.543	3.16446	2.00863	3.79944	2.41212
UK057	UK057_91	NA	653	13600	15.2	0.0678571	NA	NA	40.3877	2.06172	0.0485	7.80969	NA	NA	0.165575	8.07725	0.02476	2.06172	-0.053295	NA	NA	NA	NA	NA	157.669	3.21126	3.83942	155.571	11.6511	11.8933	NA	NA	NA	73.1685	NA		157.669	3.21126	2.03671	3.83942	2.43778
UK057	UK057_265	NA	465	9780	17.4	0.0661597	NA	NA	40.3877	2.11419	0.052	8.48999	NA	NA	0.177523	8.74927	0.02476	2.11419	-0.24005	NA	NA	NA	NA	NA	157.669	3.29299	3.90803	165.927	13.3941	13.6318	NA	NA	NA	25.755	NA		157.669	3.29299	2.08854	3.90803	2.46562
UK057	UK057_269	NA	560	11680	27.5	0.0653672	NA	NA	40.3877	2.08948	0.0518	8.35811	NA	NA	0.17684	8.61533	0.02476	2.08948	-8.413e-06	NA	NA	NA	NA	NA	157.669	3.2545	3.87565	165.338	13.1459	13.3865	NA	NA	NA	25.8974	NA		157.669	3.2545	2.06413	3.87565	2.45127
UK057	UK057_256	NA	424	9230	12.7	0.0668421	NA	NA	40.3714	2.07232	0.0501	8.49051	NA	NA	0.171106	8.73975	0.02477	2.07232	0.29659	NA	NA	NA	NA	NA	157.732	3.22904	3.85476	160.378	12.9665	13.1971	NA	NA	NA	66.9887	NA		157.732	3.22904	2.04717	3.85476	2.4444
UK057	UK057_114	NA	894	18820	29.4	0.0725926	NA	NA	40.3551	2.04199	0.0498	7.42876	NA	NA	0.17015	7.7043	0.02478	2.04199	0.16506	NA	NA	NA	NA	NA	157.795	3.18305	3.81677	159.549	11.3755	11.6353	NA	NA	NA	75.6296	NA		157.795	3.18305	2.0172	3.81677	2.41794
UK057	UK057_146	NA	341	7570	12.99	0.066718	NA	NA	40.3551	2.17718	0.048	9.05597	NA	NA	0.164	9.314	0.02478	2.17718	-0.16781	NA	NA	NA	NA	NA	157.795	3.39378	3.9942	154.198	13.3255	13.5344	NA	NA	NA	61.4221	NA		157.795	3.39378	2.15075	3.9942	2.53668
UK057	UK057_42	NA	815	17160	25.5	0.0676572	NA	NA	40.3226	2.08911	0.0485	7.57856	NA	NA	0.165842	7.86123	0.0248	2.08911	0.056382	NA	NA	NA	NA	NA	157.921	3.25906	3.88129	155.804	11.3552	11.6043	NA	NA	NA	71.5714	NA		157.921	3.25906	2.06373	3.88129	2.45983
UK057	UK057_266	NA	820	17160	33.5	0.0686475	NA	NA	40.3226	2.06144	0.0516	7.81776	NA	NA	0.176442	8.08498	0.0248	2.06144	0.033132	NA	NA	NA	NA	NA	157.921	3.21589	3.84511	164.995	12.313	12.5685	NA	NA	NA	26.3827	NA		157.921	3.21589	2.03639	3.84511	2.42873
UK057	UK057_201	NA	1118	23490	4.51	0.0670134	NA	NA	40.2901	2.07746	0.0499	7.25338	NA	NA	0.170767	7.54502	0.02482	2.07746	0.074964	NA	NA	NA	NA	NA	158.047	3.24343	3.86908	160.084	11.1748	11.4407	NA	NA	NA	72.0968	NA		158.047	3.24343	2.0522	3.86908	2.44617
UK057	UK057_245	NA	665	15330	44.7	0.0631356	NA	NA	40.2901	2.05125	0.0476	7.86393	NA	NA	0.162896	8.12705	0.02482	2.05125	0.028172	NA	NA	NA	NA	NA	158.047	3.20251	3.83484	153.235	11.5598	11.7973	NA	NA	NA	41.801	NA		158.047	3.20251	2.02631	3.83484	2.43124
UK057	UK057_66	NA	1363	29900	54.1	0.0698065	NA	NA	40.2739	2.02864	0.0467	7.06824	NA	NA	0.15988	7.3536	0.02483	2.02864	0.12993	NA	NA	NA	NA	NA	158.11	3.16846	3.80691	150.598	10.2926	10.5503	NA	NA	NA	14.6025	NA		158.11	3.16846	2.00396	3.80691	2.41405
UK057	UK057_180	NA	924	19810	34.2	0.0697959	NA	NA	40.2576	2.0773	0.0497	7.47639	NA	NA	0.170219	7.75961	0.02484	2.0773	0.27166	NA	NA	NA	NA	NA	158.172	3.24573	3.87191	159.609	11.4612	11.7192	NA	NA	NA	79.4589	NA		158.172	3.24573	2.05202	3.87191	2.44783
UK057	UK057_215	NA	478	10740	20.3	0.0659091	NA	NA	40.2414	2.08287	0.0481	8.49842	NA	NA	0.164806	8.74994	0.02485	2.08287	0.092373	NA	NA	NA	NA	NA	158.235	3.25572	3.88073	154.901	12.5712	12.7943	NA	NA	NA	59.8726	NA		158.235	3.25572	2.05752	3.88073	2.45471
UK057	UK057_140	NA	998	22000	35.4	0.0650975	NA	NA	40.2253	2.04621	0.0474	7.38446	NA	NA	0.162473	7.66271	0.02486	2.04621	0.019711	NA	NA	NA	NA	NA	158.298	3.19967	3.83429	152.865	10.8749	11.1259	NA	NA	NA	33.4083	NA		158.298	3.19967	2.02129	3.83429	2.4285
UK057	UK057_237	NA	95	2118	2.02	0.0769817	NA	NA	40.2253	2.37917	0.0495	12.6904	NA	NA	0.169671	12.9115	0.02486	2.37917	-0.24995	NA	NA	NA	NA	NA	158.298	3.72031	4.27839	159.133	19.0196	19.1754	NA	NA	NA	93.4352	NA		158.298	3.72031	2.35019	4.27839	2.70165
UK057	UK057_81	NA	296	5650	8.41	0.079867	NA	NA	40.1929	2.18322	0.0557	9.77932	NA	NA	0.191076	10.0201	0.02488	2.18322	-0.02137	NA	NA	NA	NA	NA	158.424	3.4166	4.01797	177.547	16.3232	16.5446	NA	NA	NA	2.35554	NA		158.424	3.4166	2.15661	4.01797	2.52258
UK057	UK057_164	NA	1888	38800	130.9	0.0669565	NA	NA	40.1768	2.04604	0.0515	6.74435	NA	NA	0.176739	7.04787	0.02489	2.04604	0.081798	NA	NA	NA	NA	NA	158.487	3.20317	3.83858	165.251	10.7487	11.0414	NA	NA	NA	21.85	NA		158.487	3.20317	2.02109	3.83858	2.4157
UK057	UK057_193	NA	890	19280	25.7	0.063145	NA	NA	40.1606	2.04598	0.0487	7.58155	NA	NA	0.167197	7.85277	0.0249	2.04598	-0.00204	NA	NA	NA	NA	NA	158.55	3.20434	3.84001	156.984	11.4224	11.6735	NA	NA	NA	79.1734	NA		158.55	3.20434	2.02103	3.84001	2.42372
UK057	UK057_90	NA	642	12780	18.3	0.0717647	NA	NA	40.1284	2.07117	0.0527	8.01469	NA	NA	0.181076	8.27798	0.02492	2.07117	-0.14655	NA	NA	NA	NA	NA	158.676	3.24632	3.87602	168.986	12.8872	13.1425	NA	NA	NA	13.5145	NA		158.676	3.24632	2.04588	3.87602	2.42893
UK057	UK057_191	NA	425	9050	10.67	0.0673186	NA	NA	40.1284	2.11245	0.0502	8.5527	NA	NA	0.172486	8.80972	0.02492	2.11245	0.029337	NA	NA	NA	NA	NA	158.676	3.31103	3.93038	161.574	13.1602	13.3906	NA	NA	NA	66.7482	NA		158.676	3.31103	2.08667	3.93038	2.47459
UK057	UK057_221	NA	188	3842	6.34	0.0759281	NA	NA	40.1123	2.15288	0.0519	10.3659	NA	NA	0.178398	10.5871	0.02493	2.15288	0.00084722	NA	NA	NA	NA	NA	158.739	3.37572	3.98547	166.681	16.2758	16.4736	NA	NA	NA	34.0839	NA		158.739	3.37572	2.12659	3.98547	2.50562
UK057	UK057_155	NA	1016	20870	31.5	0.0693833	NA	NA	40.0962	2.04576	0.0514	7.32096	NA	NA	0.176751	7.60142	0.02494	2.04576	0.038379	NA	NA	NA	NA	NA	158.801	3.209	3.84574	165.261	11.5936	11.8655	NA	NA	NA	27.9407	NA		158.801	3.209	2.02077	3.84574	2.41564
UK057	UK057_282	NA	394	7910	17.4	0.0679687	NA	NA	40.0962	2.15994	0.0541	8.62938	NA	NA	0.186035	8.89559	0.02494	2.15994	-0.050586	NA	NA	NA	NA	NA	158.801	3.38811	3.99641	173.241	14.1687	14.4121	NA	NA	NA	5.14231	NA		158.801	3.38811	2.13355	3.99641	2.50227
UK057	UK057_208	NA	776	16910	28.6	0.0735408	NA	NA	40.0481	2.06028	0.0487	7.6755	NA	NA	0.167667	7.9472	0.02497	2.06028	-0.057629	NA	NA	NA	NA	NA	158.99	3.23558	3.8693	157.393	11.5876	11.8364	NA	NA	NA	79.342	NA		158.99	3.23558	2.03508	3.8693	2.43575
UK057	UK057_167	NA	981	19230	31.5	0.0702498	NA	NA	40.032	2.03216	0.0524	7.34191	NA	NA	0.180478	7.61796	0.02498	2.03216	0.20438	NA	NA	NA	NA	NA	159.053	3.19266	3.83395	168.472	11.8265	12.1026	NA	NA	NA	10.6005	NA		159.053	3.19266	2.00729	3.83395	2.40797
UK057	UK057_222	NA	993	20380	33.1	0.064775	NA	NA	40.032	2.028	0.0511	7.36886	NA	NA	0.176001	7.64283	0.02498	2.028	-0.03925	NA	NA	NA	NA	NA	159.053	3.18612	3.8285	164.613	11.6148	11.8842	NA	NA	NA	36.1682	NA		159.053	3.18612	2.00318	3.8285	2.40052
UK057	UK057_1	NA	996	19570	22.8	0.0693642	NA	NA	40	2.06525	0.0514	7.36271	NA	NA	0.177176	7.64688	0.025	2.06525	0.2207	NA	NA	NA	NA	NA	159.179	3.24718	3.88037	165.627	11.6868	11.9576	NA	NA	NA	26.0115	NA		159.179	3.24718	2.03996	3.88037	2.43616
UK057	UK057_58	NA	412	8030	8.96	0.0726683	NA	NA	39.984	2.15179	0.0539	8.68981	NA	NA	0.185868	8.95226	0.02501	2.15179	0.14076	NA	NA	NA	NA	NA	159.242	3.38457	3.99649	173.097	14.2482	14.4898	NA	NA	NA	5.20707	NA		159.242	3.38457	2.12543	3.99649	2.50483
UK057	UK057_80	NA	958	20270	34.1	0.0716387	NA	NA	39.984	2.07049	0.0489	7.40164	NA	NA	0.168626	7.68578	0.02501	2.07049	-0.065896	NA	NA	NA	NA	NA	159.242	3.25669	3.88878	158.226	11.2612	11.5195	NA	NA	NA	86.4644	NA		159.242	3.25669	2.04512	3.88878	2.44349
UK057	UK057_197	NA	645	14190	24.5	0.0669399	NA	NA	39.984	2.05498	0.0493	7.86465	NA	NA	0.170005	8.1287	0.02501	2.05498	0.26429	NA	NA	NA	NA	NA	159.242	3.23231	3.86839	159.423	11.9935	12.2398	NA	NA	NA	97.4945	NA		159.242	3.23231	2.02981	3.86839	2.42925
UK057	UK057_267	NA	841	17460	32.8	0.066129	NA	NA	39.968	2.05492	0.0525	7.74554	NA	NA	0.181112	8.0135	0.02502	2.05492	-0.047368	NA	NA	NA	NA	NA	159.305	3.23347	3.86981	169.017	12.4776	12.7411	NA	NA	NA	13.7823	NA		159.305	3.23347	2.02974	3.86981	2.41858
UK057	UK057_271	NA	1484	31510	27.8	0.0689484	NA	NA	39.968	2.03198	0.0502	7.03365	NA	NA	0.173178	7.32128	0.02502	2.03198	0.0061328	NA	NA	NA	NA	NA	159.305	3.19736	3.8397	162.173	10.9739	11.2511	NA	NA	NA	61.5558	NA		159.305	3.19736	2.00707	3.8397	2.40697
UK057	UK057_277	NA	373	8800	12.52	0.0666312	NA	NA	39.968	2.07041	0.0458	8.61517	NA	NA	0.157999	8.86046	0.02502	2.07041	0.07386	NA	NA	NA	NA	NA	159.305	3.25784	3.8902	148.95	12.2759	12.4884	NA	NA	NA	9.51206	NA		159.305	3.25784	2.04504	3.8902	2.44998
UK057	UK057_196	NA	374	8010	13.7	0.0661836	NA	NA	39.9521	2.10502	0.0478	9.10444	NA	NA	0.164964	9.34462	0.02503	2.10502	0.20421	NA	NA	NA	NA	NA	159.367	3.3136	3.93746	155.039	13.4368	13.6461	NA	NA	NA	50.9965	NA		159.367	3.3136	2.07922	3.93746	2.47143
UK057	UK057_227	NA	386	8110	10.79	0.0666873	NA	NA	39.9521	2.11766	0.0501	8.78963	NA	NA	0.172902	9.04113	0.02503	2.11766	0.075135	NA	NA	NA	NA	NA	159.367	3.33349	3.95422	161.934	13.5337	13.7588	NA	NA	NA	70.8036	NA		159.367	3.33349	2.0917	3.95422	2.47956
UK057	UK057_290	NA	827	16960	35.8	0.0724696	NA	NA	39.9042	2.04051	0.0534	7.65777	NA	NA	0.184512	7.92497	0.02506	2.04051	0.32327	NA	NA	NA	NA	NA	159.556	3.2158	3.85689	171.935	12.5353	12.8059	NA	NA	NA	3.85492	NA		159.556	3.2158	2.01546	3.85689	2.42098
UK057	UK057_252	NA	352	7080	10.47	0.0729109	NA	NA	39.8724	2.15796	0.0527	8.94444	NA	NA	0.182238	9.20108	0.02508	2.15796	-0.066016	NA	NA	NA	NA	NA	159.682	3.40354	4.01565	169.985	14.4023	14.6337	NA	NA	NA	17.1858	NA		159.682	3.40354	2.13145	4.01565	2.50428
UK057	UK057_122	NA	916	18780	25.8	0.0694108	NA	NA	39.8565	2.08085	0.0502	7.4266	NA	NA	0.173662	7.71261	0.02509	2.08085	0.27909	NA	NA	NA	NA	NA	159.745	3.28321	3.91463	162.592	11.5881	11.8521	NA	NA	NA	60.9284	NA		159.745	3.28321	2.05528	3.91463	2.4505
UK057	UK057_25	NA	1361	27140	53.5	0.0731874	NA	NA	39.8406	2.01968	0.0521	7.03577	NA	NA	0.180307	7.31992	0.0251	2.01968	0.21596	NA	NA	NA	NA	NA	159.808	3.18793	3.83553	168.325	11.3546	11.6415	NA	NA	NA	12.677	NA		159.808	3.18793	1.99486	3.83553	2.39776
UK057	UK057_179	NA	990	20250	30.7	0.0710648	NA	NA	39.8406	2.04486	0.0511	7.39683	NA	NA	0.176846	7.67428	0.0251	2.04486	-0.11322	NA	NA	NA	NA	NA	159.808	3.22768	3.86863	165.343	11.7102	11.9796	NA	NA	NA	37.6618	NA		159.808	3.22768	2.01972	3.86863	2.41297
UK057	UK057_124	NA	644	14280	18.41	0.0705634	NA	NA	39.8248	2.08069	0.0474	7.89706	NA	NA	0.164107	8.16657	0.02511	2.08069	0.075427	NA	NA	NA	NA	NA	159.871	3.2855	3.91745	154.292	11.6902	11.9281	NA	NA	NA	34.7309	NA		159.871	3.2855	2.0551	3.91745	2.45521
UK057	UK057_251	NA	193	3870	6.32	0.0623274	NA	NA	39.8089	2.25181	0.0527	10.3409	NA	NA	0.182529	10.5832	0.02512	2.25181	-0.053025	NA	NA	NA	NA	NA	159.933	3.55709	4.1483	170.234	16.5885	16.7903	NA	NA	NA	23.1701	NA		159.933	3.55709	2.22411	4.1483	2.58493
UK057	UK057_50	NA	616	12190	19.9	0.0741984	NA	NA	39.7141	2.09155	0.0523	8.22358	NA	NA	0.181576	8.48539	0.02518	2.09155	-0.087333	NA	NA	NA	NA	NA	160.311	3.31163	3.94254	169.416	13.2411	13.4908	NA	NA	NA	19.2691	NA		160.311	3.31163	2.06575	3.94254	2.4488
UK057	UK057_131	NA	404	8470	13.6	0.0719577	NA	NA	39.7141	2.12903	0.0474	8.64004	NA	NA	0.164564	8.89848	0.02518	2.12903	0.051692	NA	NA	NA	NA	NA	160.311	3.37097	3.99251	154.69	12.7685	12.9877	NA	NA	NA	38.7357	NA		160.311	3.37097	2.10277	3.99251	2.49523
UK057	UK057_82	NA	615	13110	16.9	0.0746137	NA	NA	39.6983	2.02711	0.0489	8.06892	NA	NA	0.169839	8.31966	0.02519	2.02711	0.075508	NA	NA	NA	NA	NA	160.374	3.21085	3.85873	159.28	12.265	12.5056	NA	NA	NA	86.0312	NA		160.374	3.21085	2.00211	3.85873	2.40687
UK057	UK057_209	NA	583	13000	20	0.0682594	NA	NA	39.6825	2.09137	0.0481	8.13579	NA	NA	0.167127	8.4003	0.0252	2.09137	0.19781	NA	NA	NA	NA	NA	160.437	3.31391	3.94535	156.923	12.2145	12.4495	NA	NA	NA	55.7661	NA		160.437	3.31391	2.06556	3.94535	2.46026
UK057	UK057_78	NA	298	6580	8.68	0.0710893	NA	NA	39.6511	2.13523	0.0461	9.39298	NA	NA	0.160305	9.63262	0.02522	2.13523	0.05516	NA	NA	NA	NA	NA	160.562	3.38603	4.00701	150.97	13.5137	13.7119	NA	NA	NA	16.1101	NA		160.562	3.38603	2.10886	4.00701	2.50279
UK057	UK057_206	NA	506	10770	21.3	0.0671924	NA	NA	39.6197	2.08525	0.0496	8.51442	NA	NA	0.172613	8.76605	0.02524	2.08525	-0.045211	NA	NA	NA	NA	NA	160.688	3.30932	3.9433	161.684	13.1031	13.3348	NA	NA	NA	88.4131	NA		160.688	3.30932	2.05947	3.9433	2.45296
UK057	UK057_69	NA	1024	21700	33.1	0.0730684	NA	NA	39.604	2.02293	0.049	7.34129	NA	NA	0.170592	7.6149	0.02525	2.02293	0.03082	NA	NA	NA	NA	NA	160.751	3.21167	3.86218	159.933	11.2685	11.5318	NA	NA	NA	88.7966	NA		160.751	3.21167	1.99792	3.86218	2.40342
UK057	UK057_109	NA	221	5460	8.66	0.0704638	NA	NA	39.5883	2.18478	0.0436	9.80505	NA	NA	0.151852	10.0455	0.02526	2.18478	-0.025752	NA	NA	NA	NA	NA	160.814	3.46996	4.07992	143.546	13.4478	13.6293	NA	NA	NA	1.27828	NA		160.814	3.46996	2.15775	4.07992	2.55605
UK057	UK057_134	NA	413	8460	9.65	0.0720149	NA	NA	39.5883	2.15546	0.0515	8.54865	NA	NA	0.179367	8.8162	0.02526	2.15546	0.0076675	NA	NA	NA	NA	NA	160.814	3.4234	4.04039	167.515	13.6154	13.8534	NA	NA	NA	34.0233	NA		160.814	3.4234	2.1288	4.04039	2.50648
UK057	UK057_141	NA	743	15640	23	0.0716511	NA	NA	39.5726	2.05829	0.0511	7.79165	NA	NA	0.178044	8.05893	0.02527	2.05829	-0.06319	NA	NA	NA	NA	NA	160.877	3.27033	3.912	166.376	12.3679	12.6262	NA	NA	NA	39.8261	NA		160.877	3.27033	2.03282	3.912	2.4252
UK057	UK057_288	NA	678	14300	20.5	0.0735822	NA	NA	39.5726	2.04858	0.0496	7.81377	NA	NA	0.172818	8.07785	0.02527	2.04858	-0.084613	NA	NA	NA	NA	NA	160.877	3.2549	3.89911	161.861	12.0866	12.3379	NA	NA	NA	87.7582	NA		160.877	3.2549	2.02322	3.89911	2.4224
UK057	UK057_230	NA	541	10660	17.6	0.073029	NA	NA	39.557	2.09652	0.0545	8.22743	NA	NA	0.189966	8.49035	0.02528	2.09652	0.068825	NA	NA	NA	NA	NA	160.94	3.33236	3.96445	176.6	13.7633	14.0226	NA	NA	NA	2.56371	NA		160.94	3.33236	2.07057	3.96445	2.45381
UK057	UK057_14	NA	934	18800	29.8	0.0764103	NA	NA	39.5413	2.0267	0.0522	7.6597	NA	NA	0.182021	7.92329	0.02529	2.0267	0.041416	NA	NA	NA	NA	NA	161.002	3.22262	3.87313	169.798	12.3895	12.6571	NA	NA	NA	16.6704	NA		161.002	3.22262	2.0016	3.87313	2.3986
UK057	UK057_65	NA	757	16000	18	0.0669643	NA	NA	39.5413	2.07921	0.0486	7.75845	NA	NA	0.169467	8.03222	0.02529	2.07921	-0.12582	NA	NA	NA	NA	NA	161.002	3.30613	3.94288	158.957	11.8191	12.0676	NA	NA	NA	74.6486	NA		161.002	3.30613	2.05346	3.94288	2.45204
UK057	UK057_270	NA	153	3080	5.26	0.0730556	NA	NA	39.5413	2.29183	0.0542	10.9351	NA	NA	0.188995	11.1726	0.02529	2.29183	0.010186	NA	NA	NA	NA	NA	161.002	3.64421	4.23038	175.771	18.0344	18.2314	NA	NA	NA	11.0059	NA		161.002	3.64421	2.26345	4.23038	2.61872
UK057	UK057_83	NA	783	16060	19.18	0.0715672	NA	NA	39.5101	2.08465	0.0514	7.7993	NA	NA	0.179373	8.0731	0.02531	2.08465	0.21655	NA	NA	NA	NA	NA	161.128	3.31732	3.95317	167.521	12.468	12.7275	NA	NA	NA	29.5631	NA		161.128	3.31732	2.05881	3.95317	2.45214
UK057	UK057_41	NA	971	19140	31.5	0.0704698	NA	NA	39.4945	2.07351	0.0526	7.61819	NA	NA	0.183633	7.89534	0.02532	2.07351	0.24095	NA	NA	NA	NA	NA	161.191	3.30088	3.93983	171.182	12.4382	12.7087	NA	NA	NA	9.95977	NA		161.191	3.30088	2.04781	3.93983	2.44327
UK057	UK057_293	NA	770	15940	35.4	0.0702381	NA	NA	39.4945	2.03063	0.0523	7.85874	NA	NA	0.182586	8.11685	0.02532	2.03063	0.068416	NA	NA	NA	NA	NA	161.191	3.23261	3.88282	170.283	12.7255	12.9875	NA	NA	NA	16.0771	NA		161.191	3.23261	2.00545	3.88282	2.40272
UK057	UK057_235	NA	68	1365	2.25	0.080848	NA	NA	39.4789	2.5651	0.053	14.2398	NA	NA	0.185103	14.469	0.02533	2.5651	0.074833	NA	NA	NA	NA	NA	161.254	4.08502	4.61708	172.442	22.9508	23.1006	NA	NA	NA	33.329	NA		161.254	4.08502	2.53328	4.61708	2.8597
UK057	UK057_133	NA	1332	28100	25.9	0.069437	NA	NA	39.4633	2.00528	0.0508	7.14376	NA	NA	0.177489	7.41987	0.02534	2.00528	-0.0029369	NA	NA	NA	NA	NA	161.317	3.19471	3.85225	165.898	11.3569	11.6362	NA	NA	NA	43.8633	NA		161.317	3.19471	1.9804	3.85225	2.38302
UK057	UK057_162	NA	236	5250	6.88	0.0807512	NA	NA	39.4633	2.1687	0.0499	9.84385	NA	NA	0.174345	10.0799	0.02534	2.1687	0.077639	NA	NA	NA	NA	NA	161.317	3.45507	4.07076	163.182	15.1961	15.3998	NA	NA	NA	80.7727	NA		161.317	3.45507	2.14179	4.07076	2.52249
UK057	UK057_40	NA	1304	26970	53.6	0.0734247	NA	NA	39.4322	2.0117	0.0504	7.19497	NA	NA	0.17623	7.47092	0.02536	2.0117	0.039363	NA	NA	NA	NA	NA	161.443	3.20741	3.86371	164.812	11.3661	11.6419	NA	NA	NA	56.4804	NA		161.443	3.20741	1.98672	3.86371	2.39002
UK057	UK057_132	NA	390	7640	9.03	0.0705469	NA	NA	39.4322	2.09577	0.0539	8.5519	NA	NA	0.188469	8.80496	0.02536	2.09577	0.24682	NA	NA	NA	NA	NA	161.443	3.34145	3.97568	175.322	14.1787	14.4272	NA	NA	NA	4.48098	NA		161.443	3.34145	2.06975	3.97568	2.46336
UK057	UK057_229	NA	445	9060	15.7	0.0655259	NA	NA	39.4322	2.09577	0.0521	8.46334	NA	NA	0.182175	8.71896	0.02536	2.09577	-0.058422	NA	NA	NA	NA	NA	161.443	3.34145	3.97568	169.93	13.6436	13.8874	NA	NA	NA	23.4734	NA		161.443	3.34145	2.06975	3.97568	2.45388
UK057	UK057_182	NA	394	8240	15.4	0.0716279	NA	NA	39.4166	2.18304	0.0519	8.58496	NA	NA	0.181547	8.85817	0.02537	2.18304	0.29891	NA	NA	NA	NA	NA	161.505	3.48193	4.09489	169.391	13.821	14.0603	NA	NA	NA	23.4188	NA		161.505	3.48193	2.15592	4.09489	2.53712
UK057	UK057_54	NA	377	8560	9.68	0.0709677	NA	NA	39.4011	2.09559	0.0473	9.07405	NA	NA	0.165521	9.31288	0.02538	2.09559	0.18107	NA	NA	NA	NA	NA	161.568	3.34372	3.97849	155.525	13.4299	13.6405	NA	NA	NA	35.9852	NA		161.568	3.34372	2.06954	3.97849	2.46406
UK057	UK057_207	NA	315	5950	12.3	0.0727811	NA	NA	39.4011	2.17544	0.0552	9.15174	NA	NA	0.193167	9.40675	0.02538	2.17544	0.16537	NA	NA	NA	NA	NA	161.568	3.47114	4.08616	179.328	15.4644	15.7022	NA	NA	NA	2.11566	NA		161.568	3.47114	2.14841	4.08616	2.52556
UK057	UK057_7	NA	339	6880	7.57	0.0693859	NA	NA	39.3546	2.11988	0.0498	8.78221	NA	NA	0.174476	9.03444	0.02541	2.11988	0.032886	NA	NA	NA	NA	NA	161.757	3.38638	4.01574	163.296	13.6285	13.8555	NA	NA	NA	82.5282	NA		161.757	3.38638	2.0935	4.01574	2.48137
UK057	UK057_75	NA	309	5920	6.94	0.0715464	NA	NA	39.3546	2.34413	0.0541	10.247	NA	NA	0.189541	10.5117	0.02541	2.34413	-0.12528	NA	NA	NA	NA	NA	161.757	3.74461	4.32212	176.238	17.0085	17.2182	NA	NA	NA	10.718	NA		161.757	3.74461	2.31496	4.32212	2.65582
UK057	UK057_71	NA	957	19620	29.7	0.072439	NA	NA	39.3391	2.05245	0.0503	7.46409	NA	NA	0.176297	7.74113	0.02542	2.05245	0.17956	NA	NA	NA	NA	NA	161.82	3.27993	3.92684	164.869	11.781	12.0475	NA	NA	NA	60.1062	NA		161.82	3.27993	2.0269	3.92684	2.4254
UK057	UK057_264	NA	1567	34300	102.9	0.0699049	NA	NA	39.3236	2.03431	0.049	6.87603	NA	NA	0.171808	7.17065	0.02543	2.03431	0.071621	NA	NA	NA	NA	NA	161.883	3.2522	3.90417	160.987	10.6756	10.9565	NA	NA	NA	86.982	NA		161.883	3.2522	2.00898	3.90417	2.41263
UK057	UK057_138	NA	1322	27960	28.9	0.0686461	NA	NA	39.2773	2.01141	0.0488	7.04611	NA	NA	0.171309	7.32758	0.02546	2.01141	0.12526	NA	NA	NA	NA	NA	162.071	3.21928	3.87818	160.554	10.8822	11.1565	NA	NA	NA	78.1651	NA		162.071	3.21928	1.98634	3.87818	2.394
UK057	UK057_263	NA	569	12180	22.9	0.07411	NA	NA	39.2773	2.06206	0.0497	8.25779	NA	NA	0.174468	8.51136	0.02546	2.06206	-0.04086	NA	NA	NA	NA	NA	162.071	3.30034	3.94572	163.289	12.8389	13.0795	NA	NA	NA	85.5664	NA		162.071	3.30034	2.03635	3.94572	2.43327
UK057	UK057_74	NA	188	3580	4.11	0.0744565	NA	NA	39.2003	2.2693	0.0541	10.5577	NA	NA	0.190287	10.7988	0.02551	2.2693	0.035514	NA	NA	NA	NA	NA	162.385	3.63899	4.23517	176.874	17.531	17.7359	NA	NA	NA	10.5377	NA		162.385	3.63899	2.24096	4.23517	2.60022
UK057	UK057_216	NA	352	7030	11.2	0.0758294	NA	NA	39.0778	2.14414	0.0528	9.09022	NA	NA	0.186297	9.33967	0.02559	2.14414	-0.046955	NA	NA	NA	NA	NA	162.888	3.4488	4.07645	173.465	14.8938	15.126	NA	NA	NA	17.2772	NA		162.888	3.4488	2.11728	4.07645	2.49301
UK057	UK057_45	NA	503	10670	13.87	0.0739339	NA	NA	39.0625	2.11779	0.0489	8.39234	NA	NA	0.172604	8.65543	0.0256	2.11779	-0.0085636	NA	NA	NA	NA	NA	162.951	3.40772	4.04219	161.676	12.9372	13.1718	NA	NA	NA	84.9042	NA		162.951	3.40772	2.09125	4.04219	2.48191
UK057	UK057_165	NA	559	12200	27.1	0.0698454	NA	NA	38.956	2.14312	0.049	8.22193	NA	NA	0.17343	8.49665	0.02567	2.14312	0.1963	NA	NA	NA	NA	NA	163.391	3.45767	4.08748	162.391	12.7517	12.9915	NA	NA	NA	87.3189	NA		163.391	3.45767	2.11619	4.08748	2.50198
UK057	UK057_238	NA	542	11000	20.5	0.0640625	NA	NA	38.956	2.15689	0.0532	8.41982	NA	NA	0.188295	8.69169	0.02567	2.15689	0.082146	NA	NA	NA	NA	NA	163.391	3.47988	4.10629	175.173	13.9854	14.2369	NA	NA	NA	9.71764	NA		163.391	3.47988	2.12978	4.10629	2.50598
UK057	UK057_210	NA	778	15170	19.1	0.0665505	NA	NA	38.9408	2.08157	0.0545	8.09896	NA	NA	0.192971	8.36218	0.02568	2.08157	0.09926	NA	NA	NA	NA	NA	163.454	3.35963	4.00534	179.161	13.7353	14.002	NA	NA	NA	2.3934	NA		163.454	3.35963	2.0554	4.00534	2.44245
UK057	UK057_244	NA	584	12530	22.3	0.0684049	NA	NA	38.9105	2.06549	0.0481	8.2398	NA	NA	0.170443	8.49473	0.0257	2.06549	0.08486	NA	NA	NA	NA	NA	163.58	3.33622	3.98663	159.803	12.5612	12.7976	NA	NA	NA	55.1987	NA		163.58	3.33622	2.03951	3.98663	2.43977
UK057	UK057_176	NA	233	4790	6.88	0.0726505	NA	NA	38.6997	2.15459	0.0509	9.56097	NA	NA	0.181347	9.80073	0.02584	2.15459	0.034764	NA	NA	NA	NA	NA	164.46	3.49862	4.12964	169.219	15.2776	15.4941	NA	NA	NA	54.1351	NA		164.46	3.49862	2.12734	4.12964	2.50794
UK057	UK057_29	NA	689	13450	17.8	0.0767241	NA	NA	38.6399	2.09107	0.0522	7.76209	NA	NA	0.186267	8.03882	0.02588	2.09107	-0.074638	NA	NA	NA	NA	NA	164.711	3.40059	4.04872	173.439	12.8174	13.0864	NA	NA	NA	19.7722	NA		164.711	3.40059	2.06458	4.04872	2.44763
UK057	UK057_214	NA	62	1451	2.51	0.0717143	NA	NA	38.6399	2.58703	0.0447	13.4295	NA	NA	0.159505	13.6764	0.02588	2.58703	0.1485	NA	NA	NA	NA	NA	164.711	4.20715	4.74639	150.269	19.1053	19.2448	NA	NA	NA	12.4675	NA		164.711	4.20715	2.55426	4.74639	2.88592
UK057	UK057_88	NA	109	2003	2.12	0.0738933	NA	NA	38.625	2.40775	0.0583	12.0054	NA	NA	0.208114	12.2444	0.02589	2.40775	-0.1421	NA	NA	NA	NA	NA	164.774	3.91706	4.49167	191.969	21.4203	21.6153	NA	NA	NA	1.60128	NA		164.774	3.91706	2.37724	4.49167	2.70215
UK057	UK057_200	NA	442	10390	13.6	0.0814859	NA	NA	38.625	2.1273	0.0454	8.57484	NA	NA	0.162065	8.83478	0.02589	2.1273	0.071849	NA	NA	NA	NA	NA	164.774	3.46081	4.09987	152.509	12.5114	12.7292	NA	NA	NA	5.28697	NA		164.774	3.46081	2.10034	4.09987	2.49855
UK057	UK057_169	NA	502	9880	19.4	0.0742158	NA	NA	38.5802	2.08511	0.0533	8.29188	NA	NA	0.190486	8.55003	0.02592	2.08511	0.11837	NA	NA	NA	NA	NA	164.962	3.39601	4.04668	177.044	13.892	14.1501	NA	NA	NA	8.39584	NA		164.962	3.39601	2.05866	4.04668	2.44773
UK057	UK057_226	NA	282	5570	8.61	0.0742241	NA	NA	38.5654	2.23573	0.0545	9.46982	NA	NA	0.19485	9.73016	0.02593	2.23573	0.25178	NA	NA	NA	NA	NA	165.025	3.64269	4.25623	180.759	16.1129	16.3445	NA	NA	NA	4.53183	NA		165.025	3.64269	2.20736	4.25623	2.58086
UK057	UK057_185	NA	673	13860	18.2	0.0737439	NA	NA	38.5208	2.10788	0.0516	8.05925	NA	NA	0.184695	8.33035	0.02596	2.10788	0.10284	NA	NA	NA	NA	NA	165.214	3.43826	4.08398	172.093	13.1876	13.4456	NA	NA	NA	30.1744	NA		165.214	3.43826	2.0811	4.08398	2.46783
UK057	UK057_228	NA	524	11050	19	0.0733591	NA	NA	38.4615	2.07369	0.0502	8.19124	NA	NA	0.179961	8.44965	0.026	2.07369	0.1656	NA	NA	NA	NA	NA	165.465	3.38757	4.0432	168.027	13.0859	13.3348	NA	NA	NA	69.2961	NA		165.465	3.38757	2.0473	4.0432	2.44262
UK057	UK057_166	NA	1817	34800	88.8	0.0790739	NA	NA	38.4025	2.15882	0.0538	6.75537	NA	NA	0.193163	7.09194	0.02604	2.15882	0.3386	NA	NA	NA	NA	NA	165.716	3.53193	4.16665	179.325	11.6584	11.9719	NA	NA	NA	1.37984	NA		165.716	3.53193	2.13131	4.16665	2.51711
UK057	UK057_217	NA	688	13890	16.4	0.0638132	NA	NA	38.3877	2.10699	0.0515	7.97625	NA	NA	0.184976	8.24984	0.02605	2.10699	0.10417	NA	NA	NA	NA	NA	165.779	3.44842	4.09655	172.334	13.0769	13.3377	NA	NA	NA	32.1034	NA		165.779	3.44842	2.08013	4.09655	2.4671
UK057	UK057_111	NA	996	21120	19.6	0.0728625	NA	NA	38.373	2.04872	0.0486	7.39756	NA	NA	0.174627	7.67601	0.02606	2.04872	0.047277	NA	NA	NA	NA	NA	165.842	3.3543	4.0181	163.427	11.5877	11.8542	NA	NA	NA	68.4743	NA		165.842	3.3543	2.02259	4.0181	2.4252
UK057	UK057_153	NA	207	4158	5.5	0.0935374	NA	NA	38.3142	2.13781	0.0528	10.0058	NA	NA	0.19001	10.2316	0.0261	2.13781	0.034834	NA	NA	NA	NA	NA	166.093	3.50541	4.14685	176.637	16.5897	16.8055	NA	NA	NA	21.252	NA		166.093	3.50541	2.11051	4.14685	2.49107
UK057	UK057_43	NA	226	4740	7.39	0.0717476	NA	NA	38.2702	2.21625	0.0475	10.2107	NA	NA	0.171133	10.4484	0.02613	2.21625	0.24125	NA	NA	NA	NA	NA	166.282	3.63809	4.26088	160.402	15.5039	15.6974	NA	NA	NA	43.3107	NA		166.282	3.63809	2.18791	4.26088	2.56233
UK057	UK057_49	NA	747	14270	19.4	0.0811715	NA	NA	38.2117	2.07768	0.0527	7.84717	NA	NA	0.190158	8.11757	0.02617	2.07768	0.16578	NA	NA	NA	NA	NA	166.533	3.41571	4.07446	176.764	13.1702	13.4413	NA	NA	NA	11.8505	NA		166.533	3.41571	2.05107	4.07446	2.44304
UK057	UK057_128	NA	1341	26300	22.8	0.077551	NA	NA	38.2117	2.05744	0.0528	6.99911	NA	NA	0.190519	7.29525	0.02617	2.05744	0.088319	NA	NA	NA	NA	NA	166.533	3.38244	4.04661	177.072	11.8547	12.1562	NA	NA	NA	8.13174	NA		166.533	3.38244	2.0311	4.04661	2.42171
UK057	UK057_163	NA	297	6720	12.04	0.0735492	NA	NA	38.2117	2.19281	0.0446	9.23535	NA	NA	0.160931	9.49211	0.02617	2.19281	0.039019	NA	NA	NA	NA	NA	166.533	3.60498	4.23439	151.518	13.3614	13.5631	NA	NA	NA	2.738	NA		166.533	3.60498	2.16472	4.23439	2.55663
UK057	UK057_92	NA	644	13630	23.9	0.0773713	NA	NA	38.1971	2.07236	0.0502	8.24121	NA	NA	0.181207	8.49778	0.02618	2.07236	-0.11971	NA	NA	NA	NA	NA	166.596	3.40823	4.06864	169.099	13.2376	13.4865	NA	NA	NA	72.2072	NA		166.596	3.40823	2.04581	4.06864	2.43908
UK057	UK057_87	NA	129	2770	2.74	0.0771831	NA	NA	38.1534	2.34168	0.0501	11.1876	NA	NA	0.181053	11.43	0.02621	2.34168	-0.032967	NA	NA	NA	NA	NA	166.784	3.85547	4.45123	168.966	17.7934	17.9791	NA	NA	NA	81.197	NA		166.784	3.85547	2.31165	4.45123	2.66708
UK057	UK057_110	NA	474	10120	15.8	0.0755981	NA	NA	38.0952	2.11099	0.049	8.71241	NA	NA	0.177348	8.96451	0.02625	2.11099	-0.17324	NA	NA	NA	NA	NA	167.035	3.48082	4.13276	165.776	13.7121	13.944	NA	NA	NA	86.4056	NA		167.035	3.48082	2.08388	4.13276	2.47594
UK057	UK057_171	NA	264	5240	4.6	0.0638889	NA	NA	38.0952	2.34065	0.0547	9.4876	NA	NA	0.197978	9.77206	0.02625	2.34065	0.19198	NA	NA	NA	NA	NA	167.035	3.8595	4.45638	183.414	16.3992	16.633	NA	NA	NA	4.36364	NA		167.035	3.8595	2.31059	4.45638	2.66541
UK057	UK057_70	NA	640	12620	25.2	0.0717949	NA	NA	38.0807	2.06172	0.0533	7.89319	NA	NA	0.192985	8.15801	0.02626	2.06172	0.085753	NA	NA	NA	NA	NA	167.098	3.40083	4.06607	179.173	13.4007	13.6739	NA	NA	NA	7.60714	NA		167.098	3.40083	2.03523	4.06607	2.42618
UK057	UK057_125	NA	172	3751	5.09	0.064816	NA	NA	38.0518	2.29543	0.0496	10.4455	NA	NA	0.179725	10.6948	0.02628	2.29543	0.034038	NA	NA	NA	NA	NA	167.224	3.78915	4.39685	167.824	16.545	16.7421	NA	NA	NA	94.3237	NA		167.224	3.78915	2.26592	4.39685	2.62892
UK057	UK057_276	NA	315	6570	11.12	0.0726323	NA	NA	38.0373	2.18361	0.0511	9.02875	NA	NA	0.185231	9.28905	0.02629	2.18361	0.013549	NA	NA	NA	NA	NA	167.287	3.6059	4.24038	172.552	14.7415	14.9739	NA	NA	NA	48.7409	NA		167.287	3.6059	2.15552	4.24038	2.53055
UK057	UK057_123	NA	431	8570	16.1	0.074537	NA	NA	37.9939	2.16193	0.053	8.41356	NA	NA	0.192337	8.68688	0.02632	2.16193	0.18323	NA	NA	NA	NA	NA	167.475	3.57407	4.21466	178.621	14.2294	14.4856	NA	NA	NA	11.3754	NA		167.475	3.57407	2.13409	4.21466	2.51378
UK057	UK057_194	NA	942	19200	41.6	0.0723101	NA	NA	37.9795	2.04722	0.052	7.50829	NA	NA	0.18878	7.78239	0.02633	2.04722	0.12473	NA	NA	NA	NA	NA	167.538	3.38569	4.0566	175.588	12.5493	12.8302	NA	NA	NA	20.2397	NA		167.538	3.38569	2.02085	4.0566	2.41686
UK057	UK057_172	NA	71	1512	2.05	0.0840508	NA	NA	37.9651	2.52546	0.05	13.9978	NA	NA	0.181588	14.2238	0.02634	2.52546	0.11968	NA	NA	NA	NA	NA	167.601	4.17815	4.73853	169.426	22.1992	22.3491	NA	NA	NA	86.8848	NA		167.601	4.17815	2.49291	4.73853	2.82687
UK057	UK057_148	NA	216	4650	7.9	0.0780632	NA	NA	37.9219	2.38395	0.0476	10.4543	NA	NA	0.173069	10.7227	0.02637	2.38395	0.14815	NA	NA	NA	NA	NA	167.789	3.9484	4.53847	162.079	16.0644	16.2548	NA	NA	NA	47.3125	NA		167.789	3.9484	2.35319	4.53847	2.70714
UK057	UK057_53	NA	341	6780	13.12	0.0712269	NA	NA	37.8788	2.08122	0.0508	8.78496	NA	NA	0.184914	9.02812	0.0264	2.08122	0.20645	NA	NA	NA	NA	NA	167.978	3.45083	4.11427	172.28	14.3067	14.5453	NA	NA	NA	53.9842	NA		167.978	3.45083	2.05434	4.11427	2.44876
UK057	UK057_5	NA	98	1900	2.05	0.085027	NA	NA	37.7786	2.37174	0.0516	12.6099	NA	NA	0.188324	12.831	0.02647	2.37174	-0.080926	NA	NA	NA	NA	NA	168.417	3.94269	4.5376	175.198	20.65	20.8213	NA	NA	NA	52.6197	NA		168.417	3.94269	2.34103	4.5376	2.68903
UK057	UK057_298	NA	585	12940	4.59	0.0768844	NA	NA	37.7501	2.07526	0.0492	7.93028	NA	NA	0.1797	8.19732	0.02649	2.07526	0.16016	NA	NA	NA	NA	NA	168.543	3.45237	4.11961	167.802	12.6795	12.9355	NA	NA	NA	90.6378	NA		168.543	3.45237	2.04836	4.11961	2.44459
UK057	UK057_177	NA	725	15150	35.9	0.0732653	NA	NA	37.6648	2.05052	0.0507	7.94653	NA	NA	0.185598	8.20683	0.02655	2.05052	0.11959	NA	NA	NA	NA	NA	168.92	3.41874	4.0942	172.866	13.0456	13.3085	NA	NA	NA	54.704	NA		168.92	3.41874	2.02388	4.0942	2.42167
UK057	UK057_283	NA	333	7640	14.6	0.0768421	NA	NA	37.6364	2.11376	0.0503	9.36591	NA	NA	0.184273	9.60148	0.02657	2.11376	0.14425	NA	NA	NA	NA	NA	169.045	3.52677	4.18572	171.73	15.1708	15.3948	NA	NA	NA	72.1916	NA		169.045	3.52677	2.08629	4.18572	2.47529
UK057	UK057_142	NA	147	3300	4.92	0.0778481	NA	NA	37.6223	2.21612	0.047	10.6625	NA	NA	0.172248	10.8903	0.02658	2.21612	-0.030499	NA	NA	NA	NA	NA	169.108	3.69891	4.33219	161.368	16.2496	16.4364	NA	NA	NA	35.4427	NA		169.108	3.69891	2.18731	4.33219	2.56833
UK057	UK057_272	NA	185	3362	5.39	0.0780029	NA	NA	37.5516	2.23851	0.0542	10.6129	NA	NA	0.199009	10.8464	0.02663	2.23851	0.057268	NA	NA	NA	NA	NA	169.422	3.74313	4.37214	184.287	18.2815	18.4933	NA	NA	NA	10.9484	NA		169.422	3.74313	2.20935	4.37214	2.5741
UK057	UK057_59	NA	1311	26830	33.7	0.0787383	NA	NA	37.5094	2.02896	0.049	7.15406	NA	NA	0.180118	7.43622	0.02666	2.02896	0.083935	NA	NA	NA	NA	NA	169.61	3.39645	4.08064	168.162	11.5248	11.807	NA	NA	NA	80.4976	NA		169.61	3.39645	2.0025	4.08064	2.40713
UK057	UK057_236	NA	147	3040	7.53	0.0726133	NA	NA	37.4953	2.20705	0.0503	10.6558	NA	NA	0.184966	10.882	0.02667	2.20705	0.30631	NA	NA	NA	NA	NA	169.673	3.69592	4.33351	172.325	17.2491	17.4477	NA	NA	NA	74.8147	NA		169.673	3.69592	2.17826	4.33351	2.5549
UK057	UK057_175	NA	1240	27400	27.5	0.0737265	NA	NA	37.4532	2.04094	0.0479	7.18865	NA	NA	0.176339	7.47276	0.0267	2.04094	0.19025	NA	NA	NA	NA	NA	169.862	3.4215	4.10334	164.905	11.3748	11.6507	NA	NA	NA	37.6625	NA		169.862	3.4215	2.01429	4.10334	2.41813
UK057	UK057_198	NA	119	2500	1.72	0.0565789	NA	NA	37.4532	2.69719	0.052	13.8922	NA	NA	0.191433	14.1516	0.0267	2.69719	-0.38327	NA	NA	NA	NA	NA	169.862	4.52166	5.05728	177.851	23.0917	23.2493	NA	NA	NA	52.6864	NA		169.862	4.52166	2.66197	5.05728	2.96406
UK057	UK057_297	NA	68	1240	1.39	0.0786199	NA	NA	37.4532	2.69719	0.059	13.0357	NA	NA	0.217202	13.3118	0.0267	2.69719	0.10605	NA	NA	NA	NA	NA	169.862	4.52166	5.05728	199.579	24.1241	24.31	NA	NA	NA	1.48874	NA		169.862	4.52166	2.66197	5.05728	2.96995
UK057	UK057_199	NA	219	4440	6.47	0.0734393	NA	NA	37.4392	2.24493	0.053	9.66025	NA	NA	0.195187	9.91767	0.02671	2.24493	0.2067	NA	NA	NA	NA	NA	169.924	3.76484	4.39414	181.046	16.4472	16.6749	NA	NA	NA	16.9287	NA		169.924	3.76484	2.2156	4.39414	2.58515
UK057	UK057_89	NA	88	1658	1.86	0.0857143	NA	NA	37.4111	2.56361	0.0539	12.2335	NA	NA	0.19865	12.4992	0.02673	2.56361	0.17173	NA	NA	NA	NA	NA	170.05	4.30242	4.86341	183.983	21.0364	21.2202	NA	NA	NA	18.1854	NA		170.05	4.30242	2.53009	4.86341	2.85852
UK057	UK057_105	NA	144	3160	4.31	0.0855159	NA	NA	37.3972	2.22868	0.0482	10.5169	NA	NA	0.177709	10.7504	0.02674	2.22868	0.10907	NA	NA	NA	NA	NA	170.113	3.74168	4.3756	166.087	16.4727	16.667	NA	NA	NA	62.4707	NA		170.113	3.74168	2.19953	4.3756	2.57382
UK057	UK057_4	NA	1589	31420	35.4	0.0759657	NA	NA	37.3832	2.02118	0.0516	6.8641	NA	NA	0.190316	7.15549	0.02675	2.02118	0.050151	NA	NA	NA	NA	NA	170.175	3.39456	4.08319	176.899	11.6172	11.9241	NA	NA	NA	26.1392	NA		170.175	3.39456	1.99474	4.08319	2.39313
UK057	UK057_93	NA	2190	46200	41.8	0.0778399	NA	NA	37.3832	2.01767	0.0501	6.56794	NA	NA	0.184783	6.87087	0.02675	2.01767	0.26572	NA	NA	NA	NA	NA	170.175	3.38866	4.07829	172.168	10.8813	11.1928	NA	NA	NA	70.4571	NA		170.175	3.38866	1.99127	4.07829	2.3961
UK057	UK057_296	NA	346	6740	14.75	0.0834276	NA	NA	37.3832	2.10033	0.0556	9.19566	NA	NA	0.205069	9.43248	0.02675	2.10033	0.34506	NA	NA	NA	NA	NA	170.175	3.52749	4.19435	189.406	16.2998	16.549	NA	NA	NA	1.36606	NA		170.175	3.52749	2.07285	4.19435	2.47358
UK057	UK057_212	NA	71	1613	1.95	0.0770751	NA	NA	37.3274	2.48863	0.0472	12.0801	NA	NA	0.174348	12.3338	0.02679	2.48863	0.056956	NA	NA	NA	NA	NA	170.427	4.18572	4.76284	163.185	18.5949	18.7618	NA	NA	NA	44.0148	NA		170.427	4.18572	2.45602	4.76284	2.79911
UK057	UK057_33	NA	917	16770	25.3	0.0788162	NA	NA	37.2856	2.04462	0.054	7.61254	NA	NA	0.199689	7.88234	0.02682	2.04462	0.19671	NA	NA	NA	NA	NA	170.615	3.44267	4.12646	184.863	13.3228	13.6135	NA	NA	NA	3.05722	NA		170.615	3.44267	2.0178	4.12646	2.41546
UK057	UK057_9	NA	141	2593	2.42	0.0842912	NA	NA	37.1195	2.4835	0.0547	11.3117	NA	NA	0.203182	11.5811	0.02694	2.4835	-0.063658	NA	NA	NA	NA	NA	171.368	4.19986	4.78119	187.815	19.8604	20.0624	NA	NA	NA	11.2149	NA		171.368	4.19986	2.45078	4.78119	2.77581
UK057	UK057_23	NA	139	2940	5.33	0.077924	NA	NA	37.0508	2.32231	0.0489	11.5277	NA	NA	0.181976	11.7593	0.02699	2.32231	-0.17046	NA	NA	NA	NA	NA	171.682	3.93436	4.55182	169.759	18.3849	18.5663	NA	NA	NA	84.307	NA		171.682	3.93436	2.29166	4.55182	2.65349
UK057	UK057_254	NA	71	1507	1.91	0.0940887	NA	NA	37.037	2.57429	0.054	12.9564	NA	NA	0.201029	13.2096	0.027	2.57429	-0.2747	NA	NA	NA	NA	NA	171.745	4.36283	4.92726	185.997	22.4542	22.6299	NA	NA	NA	23.8114	NA		171.745	4.36283	2.5403	4.92726	2.8503
UK057	UK057_184	NA	208	3980	6.58	0.0781473	NA	NA	36.9413	2.26191	0.0531	9.82457	NA	NA	0.198191	10.0816	0.02707	2.26191	-0.17669	NA	NA	NA	NA	NA	172.184	3.8431	4.47656	183.594	16.9339	17.1608	NA	NA	NA	20.7351	NA		172.184	3.8431	2.23197	4.47656	2.58613
UK057	UK057_98	NA	227	4800	9.05	0.0703733	NA	NA	36.9004	2.22994	0.0481	9.4538	NA	NA	0.179728	9.71323	0.0271	2.22994	0.090726	NA	NA	NA	NA	NA	172.373	3.79288	4.43479	167.826	15.0265	15.2433	NA	NA	NA	54.783	NA		172.373	3.79288	2.20039	4.43479	2.57554
UK057	UK057_233	NA	96	2110	3.93	0.079878	NA	NA	36.9004	2.50827	0.052	12.8704	NA	NA	0.1943	13.1125	0.0271	2.50827	-0.066666	NA	NA	NA	NA	NA	172.373	4.26628	4.84589	180.292	21.6642	21.8363	NA	NA	NA	48.016	NA		172.373	4.26628	2.47504	4.84589	2.80506
UK057	UK057_240	NA	114	2340	3.47	0.0637868	NA	NA	36.8324	2.4182	0.0518	11.1045	NA	NA	0.19391	11.3647	0.02715	2.4182	0.14364	NA	NA	NA	NA	NA	172.686	4.12047	4.72004	179.96	18.7442	18.9421	NA	NA	NA	43.5788	NA		172.686	4.12047	2.3861	4.72004	2.73139
UK057	UK057_170	NA	102	2180	2.79	0.0788136	NA	NA	36.7242	2.34274	0.0517	11.8089	NA	NA	0.194106	12.039	0.02723	2.34274	-0.13897	NA	NA	NA	NA	NA	173.188	4.00334	4.62143	180.127	19.8734	20.0605	NA	NA	NA	50.6121	NA		173.188	4.00334	2.31155	4.62143	2.66182
UK057	UK057_86	NA	204	4290	4.97	0.0824759	NA	NA	36.6838	2.1834	0.0477	10.1967	NA	NA	0.179286	10.4278	0.02726	2.1834	0.13495	NA	NA	NA	NA	NA	173.377	3.73506	4.39238	167.446	16.0985	16.3002	NA	NA	NA	45.7947	NA		173.377	3.73506	2.1543	4.39238	2.53544
UK057	UK057_32	NA	541	10590	16.48	0.0871036	NA	NA	36.6032	2.11219	0.0514	8.43685	NA	NA	0.193618	8.69723	0.02732	2.11219	-0.14953	NA	NA	NA	NA	NA	173.753	3.62098	4.29846	179.711	14.3258	14.5831	NA	NA	NA	43.6924	NA		173.753	3.62098	2.08398	4.29846	2.46638
UK057	UK057_174	NA	76	1810	2.23	0.0766323	NA	NA	36.4033	2.40884	0.0422	13.5071	NA	NA	0.159835	13.7203	0.02747	2.40884	0.087241	NA	NA	NA	NA	NA	174.694	4.15161	4.76011	150.559	19.2008	19.3402	NA	NA	NA	1.13633	NA		174.694	4.15161	2.3765	4.76011	2.7358
UK057	UK057_139	NA	97	2264	2.8	0.0806916	NA	NA	36.324	2.3617	0.0462	12.4912	NA	NA	0.175368	12.7125	0.02753	2.3617	-0.151	NA	NA	NA	NA	NA	175.071	4.079	4.69937	164.067	19.2615	19.4242	NA	NA	NA	27.5568	NA		175.071	4.079	2.32992	4.69937	2.69613
UK057	UK057_275	NA	83	1605	3.07	0.0852778	NA	NA	35.5872	2.63565	0.054	12.8013	NA	NA	0.209219	13.0698	0.0281	2.63565	0.1121	NA	NA	NA	NA	NA	178.646	4.64384	5.21849	192.897	22.9652	23.1488	NA	NA	NA	21.6564	NA		178.646	4.64384	2.59947	5.21849	2.91703
UK057	UK057_149	NA	110	2631	2.87	0.08302	NA	NA	35.524	2.37217	0.045	11.8826	NA	NA	0.174659	12.1171	0.02815	2.37217	0.028445	NA	NA	NA	NA	NA	178.959	4.18684	4.81837	163.455	18.2959	18.466	NA	NA	NA	9.4073	NA		178.959	4.18684	2.33955	4.81837	2.70301
UK057	UK057_158	NA	459	8720	20	0.0847458	NA	NA	35.3857	2.12606	0.0552	8.5214	NA	NA	0.215086	8.78262	0.02826	2.12606	0.081423	NA	NA	NA	NA	NA	179.649	3.76671	4.46301	197.812	15.7868	16.0649	NA	NA	NA	2.37077	NA		179.649	3.76671	2.09671	4.46301	2.47538
UK057	UK057_224	NA	73	1685	1.73	0.0781391	NA	NA	34.965	2.61552	0.047	13.6169	NA	NA	0.185338	13.8658	0.0286	2.61552	0.0051497	NA	NA	NA	NA	NA	181.78	4.6881	5.27669	172.644	22.0174	22.1739	NA	NA	NA	41.4463	NA		181.78	4.6881	2.57899	5.27669	2.90907
UK057	UK057_118	NA	278	6230	7.18	0.072379	NA	NA	34.8189	2.18305	0.0467	9.52336	NA	NA	0.184928	9.77037	0.02872	2.18305	-0.03481	NA	NA	NA	NA	NA	182.532	3.92889	4.62053	172.292	15.4841	15.7048	NA	NA	NA	20.1536	NA		182.532	3.92889	2.15243	4.62053	2.54111
UK057	UK057_192	NA	345	7770	7.86	0.0826498	NA	NA	34.6741	2.17486	0.0484	8.99022	NA	NA	0.192461	9.24955	0.02884	2.17486	-0.033091	NA	NA	NA	NA	NA	183.284	3.93005	4.62672	178.727	15.1594	15.4003	NA	NA	NA	56.2874	NA		183.284	3.93005	2.14424	4.62672	2.52876
UK057	UK057_144	NA	427	9470	8.19	0.0834012	NA	NA	33.67	2.12859	0.0468	8.8481	NA	NA	0.191648	9.10053	0.0297	2.12859	0.17033	NA	NA	NA	NA	NA	188.67	3.95782	4.68784	178.034	14.8622	15.1062	NA	NA	NA	14.6224	NA		188.67	3.95782	2.09774	4.68784	2.48845
UK057	UK057_19	NA	557	10740	6.21	0.0782116	NA	NA	33.5233	2.10058	0.0544	8.11461	NA	NA	0.223745	8.38208	0.02983	2.10058	0.023105	NA	NA	NA	NA	NA	189.484	3.92234	4.6637	205.022	15.5625	15.8632	NA	NA	NA	5.31324	NA		189.484	3.92234	2.07001	4.6637	2.45048
UK057	UK057_247	NA	100	2190	2.88	0.0986301	NA	NA	33.4448	2.56721	0.0548	12.4385	NA	NA	0.225919	12.7006	0.0299	2.56721	-0.19182	NA	NA	NA	NA	NA	189.922	4.80458	5.42939	206.824	23.7698	23.971	NA	NA	NA	18.1758	NA		189.922	4.80458	2.52976	5.42939	2.84099
UK057	UK057_239	NA	458	9340	9.64	0.0779935	NA	NA	33.4113	2.11011	0.0522	8.402	NA	NA	0.215416	8.66292	0.02993	2.11011	0.25765	NA	NA	NA	NA	NA	190.11	3.95295	4.69389	198.088	15.5913	15.8735	NA	NA	NA	29.1427	NA		190.11	3.95295	2.0793	4.69389	2.46921
UK057	UK057_289	NA	306	6370	6.67	0.0860645	NA	NA	33.2889	2.15384	0.0522	9.40509	NA	NA	0.216208	9.64856	0.03004	2.15384	0.055256	NA	NA	NA	NA	NA	190.799	4.04927	4.78008	198.749	17.418	17.6727	NA	NA	NA	36.9696	NA		190.799	4.04927	2.12228	4.78008	2.50118
UK057	UK057_202	NA	588	12300	15.5	0.0922619	NA	NA	33.1016	2.1519	0.0487	8.21789	NA	NA	0.202853	8.49496	0.03021	2.1519	0.038973	NA	NA	NA	NA	NA	191.862	4.06786	4.80325	187.537	14.5475	14.8213	NA	NA	NA	56.2143	NA		191.862	4.06786	2.1202	4.80325	2.50711
UK057	UK057_285	NA	274	5290	7.85	0.0958486	NA	NA	33.036	2.22063	0.0552	9.35926	NA	NA	0.230384	9.61909	0.03027	2.22063	0.18186	NA	NA	NA	NA	NA	192.238	4.20587	4.92323	210.516	18.2904	18.5594	NA	NA	NA	4.41621	NA		192.238	4.20587	2.18785	4.92323	2.55849
UK057	UK057_31	NA	240	5330	5.15	0.0849835	NA	NA	32.8515	2.10573	0.0475	9.62951	NA	NA	0.199361	9.85706	0.03044	2.10573	-0.20238	NA	NA	NA	NA	NA	193.302	4.00998	4.76449	184.585	16.6382	16.8713	NA	NA	NA	32.7987	NA		193.302	4.00998	2.07447	4.76449	2.4752
UK057	UK057_56	NA	385	7210	9.5	0.0940594	NA	NA	32.8084	2.14316	0.0511	8.72738	NA	NA	0.214752	8.98668	0.03048	2.14316	-0.070695	NA	NA	NA	NA	NA	193.552	4.08646	4.83079	197.533	16.133	16.4046	NA	NA	NA	63.8509	NA		193.552	4.08646	2.1113	4.83079	2.49206
UK057	UK057_273	NA	236	5130	6.44	0.0929293	NA	NA	32.7225	2.25034	0.0496	9.81392	NA	NA	0.208995	10.0686	0.03056	2.25034	-0.031019	NA	NA	NA	NA	NA	194.052	4.30176	5.0176	192.709	17.6748	17.9123	NA	NA	NA	88.3354	NA		194.052	4.30176	2.2168	5.0176	2.58681
UK057	UK057_242	NA	1810	36200	67.9	0.0844527	NA	NA	32.4675	2.02454	0.0534	6.68304	NA	NA	0.226774	6.98296	0.0308	2.02454	0.091132	NA	NA	NA	NA	NA	195.553	3.89961	4.6883	207.532	13.1076	13.471	NA	NA	NA	7.37831	NA		195.553	3.89961	1.99414	4.6883	2.38895
UK057	UK057_232	NA	269	5540	5.66	0.0946488	NA	NA	32.3311	2.19164	0.0493	9.84256	NA	NA	0.210246	10.0836	0.03093	2.19164	-0.027412	NA	NA	NA	NA	NA	196.366	4.23876	4.97954	193.759	17.7887	18.027	NA	NA	NA	77.6623	NA		196.366	4.23876	2.1586	4.97954	2.53785
UK057	UK057_204	NA	459	10110	10.35	0.0869018	NA	NA	32.2061	2.13724	0.0501	8.66483	NA	NA	0.214487	8.92452	0.03105	2.13724	0.038254	NA	NA	NA	NA	NA	197.117	4.1491	4.9087	197.311	16.0051	16.2782	NA	NA	NA	98.1067	NA		197.117	4.1491	2.1049	4.9087	2.49012
UK057	UK057_17	NA	820	15200	15.9	0.0878453	NA	NA	32.175	2.03704	0.0549	7.72448	NA	NA	0.235264	7.98856	0.03108	2.03704	-0.043303	NA	NA	NA	NA	NA	197.304	3.95829	4.74986	214.535	15.4499	15.7783	NA	NA	NA	3.37461	NA		197.304	3.95829	2.00619	4.74986	2.39293
UK057	UK057_181	NA	520	11610	10.25	0.0833333	NA	NA	32.0718	2.07646	0.0474	8.5206	NA	NA	0.203777	8.76996	0.03118	2.07646	0.13794	NA	NA	NA	NA	NA	197.929	4.04747	4.8289	188.317	15.0754	15.3417	NA	NA	NA	19.9782	NA		197.929	4.04747	2.04491	4.8289	2.44397
UK057	UK057_57	NA	375	7390	6.71	0.0961318	NA	NA	31.6857	2.12691	0.05	8.85764	NA	NA	0.217575	9.10941	0.03156	2.12691	0.060915	NA	NA	NA	NA	NA	200.304	4.19478	4.96964	199.889	16.5299	16.8008	NA	NA	NA	96.0578	NA		200.304	4.19478	2.0942	4.96964	2.48129
UK057	UK057_84	NA	813	15990	20.6	0.088412	NA	NA	31.4861	2.05641	0.0515	7.76393	NA	NA	0.225522	8.03165	0.03176	2.05641	-0.00067575	NA	NA	NA	NA	NA	201.554	4.08065	4.88266	206.495	15.0084	15.324	NA	NA	NA	52.6088	NA		201.554	4.08065	2.02459	4.88266	2.41844
UK057	UK057_52	NA	567	11350	9.17	0.0898139	NA	NA	31.1818	2.08848	0.0504	8.11329	NA	NA	0.222859	8.37778	0.03207	2.08848	0.034828	NA	NA	NA	NA	NA	203.491	4.18349	4.98265	204.287	15.5041	15.804	NA	NA	NA	92.0347	NA		203.491	4.18349	2.05586	4.98265	2.44801
UK057	UK057_39	NA	1417	28420	40.1	0.0961631	NA	NA	30.8356	2.06483	0.0518	6.93889	NA	NA	0.231621	7.23959	0.03243	2.06483	0.28771	NA	NA	NA	NA	NA	205.739	4.18108	4.99668	211.536	13.8252	14.1822	NA	NA	NA	38.2593	NA		205.739	4.18108	2.03222	4.99668	2.42836
UK057	UK057_159	NA	434	8570	12.38	0.0854382	NA	NA	30.6937	2.12788	0.0513	8.50581	NA	NA	0.230446	8.76793	0.03258	2.12788	-0.14107	NA	NA	NA	NA	NA	206.675	4.32805	5.12685	210.567	16.6753	16.97	NA	NA	NA	66.2558	NA		206.675	4.32805	2.09413	5.12685	2.47639
UK057	UK057_13	NA	761	15250	20.7	0.0918367	NA	NA	30.656	2.08476	0.0504	7.6958	NA	NA	0.226681	7.97317	0.03262	2.08476	-0.025145	NA	NA	NA	NA	NA	206.925	4.24539	5.05904	207.455	14.9615	15.2808	NA	NA	NA	94.5999	NA		206.925	4.24539	2.05165	5.05904	2.44436
UK057	UK057_18	NA	2986	61400	61.7	0.0910029	NA	NA	30.5344	2.01326	0.0501	6.24163	NA	NA	0.22623	6.55829	0.03275	2.01326	0.14075	NA	NA	NA	NA	NA	207.737	4.11561	4.95655	207.082	12.2863	12.6718	NA	NA	NA	91.5822	NA		207.737	4.11561	1.98117	4.95655	2.38646
UK057	UK057_262	NA	608	13690	18.4	0.0938776	NA	NA	30.3951	2.12003	0.0458	7.94788	NA	NA	0.20776	8.22577	0.0329	2.12003	0.11712	NA	NA	NA	NA	NA	208.673	4.35308	5.162	191.672	14.3687	14.6569	NA	NA	NA	1.82805	NA		208.673	4.35308	2.08608	5.162	2.48527
UK057	UK057_99	NA	134	2710	1.71	0.0869786	NA	NA	30.303	2.33321	0.0525	11.477	NA	NA	0.238877	11.7117	0.033	2.33321	-0.24632	NA	NA	NA	NA	NA	209.297	4.80491	5.55243	217.501	22.9336	23.1617	NA	NA	NA	50.5529	NA		209.297	4.80491	2.29574	5.55243	2.64432
UK057	UK057_186	NA	228	4730	6.14	0.0919162	NA	NA	30.2206	2.17095	0.0509	9.58269	NA	NA	0.232229	9.82553	0.03309	2.17095	0.13486	NA	NA	NA	NA	NA	209.859	4.48257	5.27983	212.037	18.8044	19.0696	NA	NA	NA	81.628	NA		209.859	4.48257	2.136	5.27983	2.51526
UK057	UK057_143	NA	193	4070	4.16	0.0997602	NA	NA	30.2024	2.31679	0.0521	10.2839	NA	NA	0.237847	10.5417	0.03311	2.31679	0.24409	NA	NA	NA	NA	NA	209.983	4.7865	5.54102	216.656	20.5698	20.822	NA	NA	NA	50.4855	NA		209.983	4.7865	2.27947	5.54102	2.63906
UK057	UK057_241	NA	1240	24900	68.1	0.0945833	NA	NA	30.1932	2.14877	0.0518	7.21817	NA	NA	0.236549	7.53122	0.03312	2.14877	0.12408	NA	NA	NA	NA	NA	210.046	4.44066	5.24561	215.591	14.6297	14.9791	NA	NA	NA	45.3276	NA		210.046	4.44066	2.11414	5.24561	2.49387
UK057	UK057_284	NA	815	16790	15.9	0.0948122	NA	NA	30.1296	2.05325	0.0508	7.65553	NA	NA	0.232473	7.9261	0.03319	2.05325	0.015	NA	NA	NA	NA	NA	210.483	4.25195	5.08998	212.238	15.1816	15.5093	NA	NA	NA	82.3213	NA		210.483	4.25195	2.02009	5.08998	2.41685
UK057	UK057_20	NA	288	5550	5.39	0.0953982	NA	NA	30.1114	2.11259	0.0522	9.19143	NA	NA	0.239024	9.43109	0.03321	2.11259	0.13176	NA	NA	NA	NA	NA	210.607	4.37737	5.19608	217.621	18.4757	18.7583	NA	NA	NA	44.7749	NA		210.607	4.37737	2.07845	5.19608	2.46517
UK057	UK057_195	NA	732	15870	17.8	0.0904472	NA	NA	30.0842	2.16373	0.0487	7.91541	NA	NA	0.223198	8.20582	0.03324	2.16373	0.18689	NA	NA	NA	NA	NA	210.794	4.48726	5.29029	204.568	15.2047	15.5112	NA	NA	NA	40.5923	NA		210.794	4.48726	2.12874	5.29029	2.51216
UK057	UK057_35	NA	94	1970	2.21	0.105038	NA	NA	29.656	2.31916	0.0485	12.6322	NA	NA	0.225492	12.8434	0.03372	2.31916	0.028856	NA	NA	NA	NA	NA	213.789	4.87679	5.64408	206.47	23.9999	24.1986	NA	NA	NA	54.6391	NA		213.789	4.87679	2.28113	5.64408	2.64318
UK057	UK057_117	NA	289	5930	7.06	0.0905128	NA	NA	29.4898	2.21884	0.0493	9.72845	NA	NA	0.230503	9.97827	0.03391	2.21884	0.018372	NA	NA	NA	NA	NA	214.973	4.69126	5.49261	210.614	18.9814	19.241	NA	NA	NA	65.359	NA		214.973	4.69126	2.18225	5.49261	2.55782
UK057	UK057_189	NA	708	14930	12.31	0.0996761	NA	NA	29.4898	2.05724	0.0506	8.03797	NA	NA	0.236581	8.29706	0.03391	2.05724	0.013199	NA	NA	NA	NA	NA	214.973	4.34958	5.20381	215.617	16.1193	16.4372	NA	NA	NA	93.8364	NA		214.973	4.34958	2.02331	5.20381	2.42021
UK057	UK057_3	NA	314	6740	5.73	0.0997042	NA	NA	29.4031	2.1556	0.0487	9.40531	NA	NA	0.228369	9.64917	0.03401	2.1556	-0.02704	NA	NA	NA	NA	NA	215.597	4.57055	5.39419	208.851	18.2169	18.4832	NA	NA	NA	47.4041	NA		215.597	4.57055	2.11995	5.39419	2.50711
UK057	UK057_36	NA	793	15750	17.15	0.1035	NA	NA	29.1545	2.09101	0.0517	7.63985	NA	NA	0.244504	7.92083	0.0343	2.09101	0.12463	NA	NA	NA	NA	NA	217.404	4.47015	5.32217	222.102	15.8025	16.1441	NA	NA	NA	55.4852	NA		217.404	4.47015	2.05614	5.32217	2.44573
UK057	UK057_115	NA	470	9280	10.48	0.0922535	NA	NA	29.0867	2.17851	0.053	8.62735	NA	NA	0.251237	8.89815	0.03438	2.17851	-0.12547	NA	NA	NA	NA	NA	217.903	4.6677	5.49257	227.58	18.1434	18.4549	NA	NA	NA	31.765	NA		217.903	4.6677	2.1421	5.49257	2.51103
UK057	UK057_103	NA	702	14180	9.73	0.101885	NA	NA	29.0529	2.07376	0.0517	7.89186	NA	NA	0.245359	8.15978	0.03442	2.07376	0.12701	NA	NA	NA	NA	NA	218.152	4.44826	5.30913	222.8	16.325	16.6577	NA	NA	NA	57.0877	NA		218.152	4.44826	2.03906	5.30913	2.43166
UK057	UK057_161	NA	558	11500	14.6	0.0863905	NA	NA	28.9687	2.11625	0.0515	8.51893	NA	NA	0.24512	8.77785	0.03452	2.11625	-0.15941	NA	NA	NA	NA	NA	218.776	4.55215	5.40085	222.605	17.5481	17.8575	NA	NA	NA	68.4473	NA		218.776	4.55215	2.08074	5.40085	2.46461
UK057	UK057_21	NA	260	4930	3.5	0.107034	NA	NA	28.9519	2.12553	0.0517	9.6236	NA	NA	0.246215	9.85553	0.03454	2.12553	-0.19354	NA	NA	NA	NA	NA	218.9	4.57467	5.42071	223.497	19.7736	20.0508	NA	NA	NA	66.4225	NA		218.9	4.57467	2.08984	5.42071	2.47189
UK057	UK057_28	NA	494	9750	7.35	0.0945946	NA	NA	28.9436	2.13026	0.0542	8.76722	NA	NA	0.258195	9.02231	0.03455	2.13026	0.21916	NA	NA	NA	NA	NA	218.962	4.58614	5.43083	233.212	18.8017	19.1158	NA	NA	NA	12.2962	NA		218.962	4.58614	2.09449	5.43083	2.47938
UK057	UK057_68	NA	564	12200	7.9	0.0872928	NA	NA	28.6287	2.05969	0.0473	8.08481	NA	NA	0.227804	8.34305	0.03493	2.05969	-0.068662	NA	NA	NA	NA	NA	221.33	4.48133	5.35951	208.384	15.7189	16.0255	NA	NA	NA	11.7711	NA		221.33	4.48133	2.02473	5.35951	2.4345
UK057	UK057_168	NA	148	3120	2.47	0.108333	NA	NA	28.1136	2.28027	0.0531	10.332	NA	NA	0.260423	10.5807	0.03557	2.28027	-0.062796	NA	NA	NA	NA	NA	225.315	5.04905	5.86886	235.008	22.2012	22.4714	NA	NA	NA	40.2756	NA		225.315	5.04905	2.24089	5.86886	2.59798
UK057	UK057_112	NA	552	10900	4.02	0.0881579	NA	NA	28.0978	2.18117	0.0518	8.26825	NA	NA	0.25419	8.5511	0.03559	2.18117	0.16912	NA	NA	NA	NA	NA	225.44	4.83223	5.68426	229.974	17.5991	17.926	NA	NA	NA	60.3858	NA		225.44	4.83223	2.14347	5.68426	2.51994
UK057	UK057_26	NA	1246	25440	20.6	0.09685	NA	NA	27.9408	2.04236	0.0499	7.18557	NA	NA	0.246243	7.47018	0.03579	2.04236	0.04992	NA	NA	NA	NA	NA	226.684	4.54926	5.45468	223.52	14.9883	15.3521	NA	NA	NA	68.1508	NA		226.684	4.54926	2.00687	5.45468	2.40874
UK057	UK057_15	NA	441	9200	8.94	0.0980263	NA	NA	27.7316	2.19733	0.0503	8.81276	NA	NA	0.250089	9.08257	0.03606	2.19733	0.12144	NA	NA	NA	NA	NA	228.365	4.93009	5.78757	226.649	18.4519	18.756	NA	NA	NA	85.2795	NA		228.365	4.93009	2.15887	5.78757	2.5351
UK057	UK057_104	NA	322	6400	3.58	0.109816	NA	NA	27.0929	2.20893	0.0537	9.25742	NA	NA	0.273287	9.51731	0.03691	2.20893	0.057891	NA	NA	NA	NA	NA	233.651	5.06877	5.94182	245.319	20.7443	21.0559	NA	NA	NA	27.0473	NA		233.651	5.06877	2.16938	5.94182	2.53754
UK057	UK057_27	NA	623	13210	22	0.112647	NA	NA	24.6427	2.06464	0.0482	7.94417	NA	NA	0.269687	8.20808	0.04058	2.06464	0.0082575	NA	NA	NA	NA	NA	256.427	5.19038	6.20304	242.444	17.7043	18.061	NA	NA	NA	12.6434	NA		256.427	5.19038	2.02412	6.20304	2.42945
UK057	UK057_108	NA	319	6430	9.84	0.116865	NA	NA	24.3724	2.13591	0.0495	9.0676	NA	NA	0.280032	9.31577	0.04103	2.13591	0.13619	NA	NA	NA	NA	NA	259.214	5.42674	6.42139	250.683	20.6964	21.0209	NA	NA	NA	40.718	NA		259.214	5.42674	2.09354	6.42139	2.48001
UK057	UK057_292	NA	1249	24350	47.8	0.152716	NA	NA	17.0736	2.03526	0.0549	7.17375	NA	NA	0.443352	7.45687	0.05857	2.03526	-0.27052	NA	NA	NA	NA	NA	366.923	7.25928	8.71333	372.613	23.2616	23.8283	NA	NA	NA	66.4319	NA		366.923	7.25928	1.97842	8.71333	2.36944
UK057	UK057_22	NA	3246	61400	18.61	0.184257	NA	NA	14.5222	2.00719	0.0541	6.17451	NA	NA	0.513648	6.49256	0.06886	2.00719	0.053196	NA	NA	NA	NA	NA	429.284	8.33589	10.0486	420.899	22.3747	23.091	NA	NA	NA	47.3179	NA		429.284	8.33589	1.94181	10.0486	2.3458
UK057	UK057_286	NA	655	11350	38.1	0.27509	NA	NA	10.1523	2.11895	0.0631	8.02967	NA	NA	0.856972	8.30455	0.0985	2.11895	0.18182	NA	NA	711.603	171.304	172.526	605.612	12.2483	14.5265	628.469	38.9332	39.7002	NA	NA	NA	24.1321	14.8946		605.612	12.2483	2.02246	14.5265	2.39503
UK057	UK057_259	NA	4610	50600	142.3	0.637545	NA	NA	3.87898	2.05032	0.0973	5.88149	NA	NA	3.45857	6.22862	0.2578	2.05032	0.37638	NA	NA	1573	110.322	111.777	1478.58	27.0902	32.4437	1517.82	49.0977	50.8055	NA	NA	NA	9.47982	6.00282		1573	110.322	7.01346	111.777	7.54057
UK057	UK057_102	NA	5120	51800	79.1	0.757663	NA	NA	3.45901	2.01761	0.1035	5.78435	NA	NA	4.12562	6.12613	0.2891	2.01761	0.4286	NA	NA	1687.81	106.896	108.354	1637.03	29.1689	35.1056	1659.39	50.1085	51.9093	NA	NA	NA	33.402	3.00874		1687.81	106.896	6.33341	108.354	6.61006
UK057	UK057_213	NA	20330	200100	133.3	0.793452	NA	NA	3.30469	2.00303	0.1076	4.79224	NA	NA	4.48934	5.19401	0.3026	2.00303	0.41258	NA	NA	1759.17	87.7251	89.4607	1704.19	29.9963	36.1829	1729	43.1575	45.2999	NA	NA	NA	23.1208	3.12522		1759.17	87.7251	4.98674	89.4607	5.23385
UK057	UK057_64	NA	14690	143000	156.1	0.765196	NA	NA	3.08737	2.00393	0.1081	4.99733	NA	NA	4.82767	5.38415	0.3239	2.00393	0.20038	NA	NA	1767.64	91.3919	93.0563	1808.75	31.6053	38.1184	1789.73	45.3187	47.416	NA	NA	NA	44.2641	-2.3256		1767.64	91.3919	5.17028	93.0563	5.16072
UK057	UK057_248	NA	3340	32200	36.9	0.753061	NA	NA	3.18066	2.1075	0.1085	6.14359	NA	NA	4.70342	6.49502	0.3144	2.1075	0.20493	NA	NA	1774.38	112.33	113.69	1762.32	32.4971	38.6023	1767.85	54.4383	56.1826	NA	NA	NA	84.7451	0.679686		1774.38	112.33	6.33067	113.69	6.4469
UK057	UK057_79	NA	2640	24910	71.6	0.835473	NA	NA	3.06843	2.05613	0.1101	6.40321	NA	NA	4.94735	6.72524	0.3259	2.05613	0.1	NA	NA	1801.06	116.71	118.012	1818.48	32.5797	38.9846	1810.37	56.8644	58.566	NA	NA	NA	79.5187	-0.967352		1801.06	116.71	6.48011	118.012	6.49611
UK057	UK057_281	NA	8670	83300	139	0.776536	NA	NA	3.11139	2.02047	0.1127	5.36122	NA	NA	4.99426	5.72931	0.3214	2.02047	0.2901	NA	NA	1843.4	97.1558	98.6954	1796.56	31.6801	38.1111	1818.35	48.5063	50.4942	NA	NA	NA	38.2878	2.54103		1843.4	97.1558	5.27045	98.6954	5.47902
UK057	UK057_279	NA	4010	37300	102.9	0.805795	NA	NA	3.01023	2.04241	0.1148	6.01411	NA	NA	5.25827	6.35145	0.3322	2.04241	0.30299	NA	NA	1876.75	108.587	109.958	1849.04	32.8319	39.3661	1862.11	54.2381	56.0542	NA	NA	NA	63.0747	1.47658		1876.75	108.587	5.78592	109.958	5.93924
UK057	UK057_294	NA	8900	82300	224.6	0.793079	NA	NA	3.13283	2.0153	0.1173	5.37862	NA	NA	5.16253	5.74378	0.3192	2.0153	0.34021	NA	NA	1915.49	96.6303	98.1518	1785.82	31.435	37.8463	1846.46	48.8952	50.8893	NA	NA	NA	1.37415	6.76938		1915.49	96.6303	5.04468	98.1518	5.46336
UK057	UK057_100	NA	8620	75300	100.2	0.872063	NA	NA	2.94377	2.00572	0.1185	5.36581	NA	NA	5.55028	5.72842	0.3397	2.00572	0.32158	NA	NA	1933.73	96.191	97.7128	1885.23	32.7853	39.5306	1908.42	49.3243	51.3466	NA	NA	NA	35.3386	2.50824		1933.73	96.191	4.97438	97.7128	5.16931
UK057	UK057_218	NA	10940	96300	165.7	0.85149	NA	NA	2.86533	2.01869	0.12	5.20735	NA	NA	5.77441	5.58494	0.349	2.01869	0.40726	NA	NA	1956.22	93.0956	94.6583	1929.82	33.667	40.5125	1942.58	48.3742	50.4584	NA	NA	NA	58.2966	1.34935		1956.22	93.0956	4.75896	94.6583	4.89811
UK057	UK057_126	NA	12510	106900	151.8	0.903034	NA	NA	2.76167	2.0062	0.1232	5.12085	NA	NA	6.15093	5.49981	0.3621	2.0062	0.43566	NA	NA	2003.08	91.0455	92.6253	1992.12	34.3807	41.4512	1997.5	48.0707	50.205	NA	NA	NA	81.2326	0.547071		2003.08	91.0455	4.54528	92.6253	4.64678
UK057	UK057_173	NA	12320	99400	132.3	0.992498	NA	NA	2.57334	2.0193	0.1299	5.12578	NA	NA	6.96006	5.50919	0.3886	2.0193	0.42901	NA	NA	2096.61	90.1633	91.7248	2116.33	36.4292	43.8323	2106.35	48.9498	51.1161	NA	NA	NA	66.8823	-0.940628		2096.61	90.1633	4.30043	91.7248	4.3395
UK057	UK057_225	NA	28700	207000	267	0.936842	NA	NA	2.40327	2.04561	0.1477	4.56939	NA	NA	8.47382	5.00638	0.4161	2.04561	0.63888	NA	NA	2319.47	78.4261	80.1305	2242.75	38.7481	46.4378	2283.12	45.4987	47.9257	NA	NA	NA	2.7714	3.30752		2319.47	78.4261	3.38121	80.1305	3.55691
UK057	UK057_44	NA	5070	29100	100.5	1.12921	NA	NA	1.9996	2.1022	0.1794	5.81962	NA	NA	12.3703	6.18767	0.5001	2.1022	0.42801	NA	NA	2647.33	96.7083	98.0107	2614.23	45.1789	53.7063	2632.93	58.193	60.2449	NA	NA	NA	50.8617	1.25053		2647.33	96.7083	3.65305	98.0107	3.74164
UK057	UK057_121	NA	17580	100000	47.2	1.29315	NA	NA	2.03128	2.04763	0.1828	4.89631	NA	NA	12.4082	5.30723	0.4923	2.04763	0.5443	NA	NA	2678.44	81.0906	82.6279	2580.62	43.5461	52.1724	2635.8	49.9097	52.2861	NA	NA	NA	1.51954	3.65211		2678.44	81.0906	3.02753	82.6279	3.18029
UK057	UK057_30	NA	4920	26740	36.8	1.28942	NA	NA	1.9755	2.05312	0.1866	5.8424	NA	NA	13.0237	6.19265	0.5062	2.05312	0.26644	NA	NA	2712.42	96.4937	97.7832	2640.39	44.4814	53.2498	2681.37	58.4599	60.518	NA	NA	NA	19.93	2.65584		2712.42	96.4937	3.55747	97.7832	3.68583
UK057	UK057_24	NA	19680	108200	199.1	1.15621	NA	NA	1.9802	2.05107	0.187	4.84967	NA	NA	13.0207	5.26557	0.505	2.05107	0.46885	NA	NA	2715.95	80.0345	81.5808	2635.25	44.367	53.1289	2681.15	49.692	52.0946	NA	NA	NA	6.12791	2.97157		2715.95	80.0345	2.94683	81.5808	3.0759
UK057	UK057_11	NA	1056	18800	32.8	0.0719298	NA	NA	39.5101	2.03488	0.0585	7.28309	NA	NA	0.20415	7.56201	0.02531	2.03488	0.19233	NA	NA	NA	NA	NA	161.128	3.23813	3.88695	188.632	13.0185	13.3269	NA	NA	NA	0.00220875	70.6259
UK057	UK057_34	NA	470	8950	13.17	0.0776533	NA	NA	40.1606	2.12569	0.0561	8.41622	NA	NA	0.192603	8.68051	0.0249	2.12569	0.086011	NA	NA	NA	NA	NA	158.55	3.32917	3.94479	178.848	14.2355	14.4921	NA	NA	NA	0.502732	65.2553
UK057	UK057_46	NA	358	6070	7.68	0.0886836	NA	NA	39.3236	2.20504	0.0611	8.95419	NA	NA	0.214234	9.2217	0.02543	2.20504	0.28996	NA	NA	NA	NA	NA	161.883	3.52513	4.13428	197.1	16.5221	16.7863	NA	NA	NA	0.00129067	74.8143
UK057	UK057_47	NA	711	13060	19.9	0.0780392	NA	NA	39.2465	2.07769	0.0569	7.95934	NA	NA	0.1999	8.22605	0.02548	2.07769	0.20333	NA	NA	NA	NA	NA	162.197	3.32791	3.96972	185.042	13.9161	14.1952	NA	NA	NA	0.0918314	66.7397
UK057	UK057_51	NA	122	1880	1.98	0.0883929	NA	NA	36.7647	2.67429	0.064	12.5064	NA	NA	0.240022	12.7892	0.0272	2.67429	-0.015849	NA	NA	NA	NA	NA	173	4.56499	5.11455	218.438	25.141	25.3508	NA	NA	NA	0.0512363	76.673
UK057	UK057_62	NA	306	5460	6.69	0.111314	NA	NA	27.4198	2.20335	0.0581	9.63579	NA	NA	0.292155	9.88449	0.03647	2.20335	0.19736	NA	NA	NA	NA	NA	230.915	4.99781	5.86268	260.254	22.6963	23.0126	NA	NA	NA	0.933461	56.7198
UK057	UK057_85	NA	1030	19700	46	0.0762852	NA	NA	37.3274	2.09435	0.0557	7.72638	NA	NA	0.205745	8.00521	0.02679	2.09435	0.27658	NA	NA	NA	NA	NA	170.427	3.52256	4.192	189.976	13.8709	14.1645	NA	NA	NA	0.368324	61.3045
UK057	UK057_116	NA	4230	33690	93.1	0.913641	NA	NA	3.35121	2.12167	0.1309	5.97053	NA	NA	5.38567	6.33631	0.2984	2.12167	0.53568	NA	NA	2110.07	104.909	106.252	1683.37	31.4333	37.2662	1882.58	54.3142	56.1414	NA	NA	NA	3.41897e-13	20.2222
UK057	UK057_136	NA	369	6580	12.24	0.0794289	NA	NA	39.1696	2.13814	0.0578	9.05861	NA	NA	0.20346	9.30753	0.02553	2.13814	-0.033473	NA	NA	NA	NA	NA	162.511	3.43128	4.05898	188.05	15.979	16.2298	NA	NA	NA	0.214558	68.8789
UK057	UK057_151	NA	17610	108000	84.5	1.10458	NA	NA	2.23514	2.01806	0.1715	4.89074	NA	NA	10.5794	5.29074	0.4474	2.01806	0.5052	NA	NA	2572.34	81.8266	83.3814	2383.68	40.2128	48.394	2486.9	49.1202	51.473	NA	NA	NA	0.000813971	7.3339
UK057	UK057_187	NA	489	7940	17.9	0.0821101	NA	NA	39.9521	2.17333	0.067	9.25711	NA	NA	0.231226	9.50881	0.02503	2.17333	0.27746	NA	NA	NA	NA	NA	159.367	3.42112	4.02836	211.21	18.1343	18.4072	NA	NA	NA	7.81252e-07	80.9773
UK057	UK057_190	NA	110	1820	2.62	0.0729805	NA	NA	39.4166	2.41387	0.0641	11.3163	NA	NA	0.224223	11.5708	0.02537	2.41387	-0.13122	NA	NA	NA	NA	NA	161.505	3.8501	4.41221	205.418	21.5218	21.7411	NA	NA	NA	0.0116408	78.3194
UK057	UK057_223	NA	1657	20910	19.6	0.25	NA	NA	7.33138	2.09019	0.0852	7.03173	NA	NA	1.60234	7.33581	0.1364	2.09019	0.22686	NA	NA	1320.09	136.617	137.882	824.273	16.1729	19.2577	971.124	45.8949	47.0509	NA	NA	NA	1.04783e-07	37.5595
UK057	UK057_280	NA	303	5750	8	0.0660066	NA	NA	40.7997	2.18146	0.0563	9.02227	NA	NA	0.190262	9.28225	0.02451	2.18146	0.14824	NA	NA	NA	NA	NA	156.096	3.36429	3.95734	176.853	15.067	15.3048	NA	NA	NA	0.594187	66.3744
UK057	UK057_287	NA	9990	87700	120.6	0.734023	NA	NA	3.55872	2.04246	0.1217	5.27743	NA	NA	4.71518	5.65888	0.281	2.04246	0.48014	NA	NA	1981.3	94.0748	95.6127	1596.4	28.8823	34.6302	1769.94	47.44	49.4318	NA	NA	NA	1.76735e-12	19.4267
University of Calgary, Centre for Pure and Applied Tectonics and Thermochronology
Upper Kootenai Mb ( 47.535864°, -111.205008°)		f206c	207Pb CPS	206Pb CPS	U (ppm)1	U/Th	206Pb/204Pb	1σ %	Data for Tera-Wasserburg plot2				208Pb/206Pb	2σx (%)	Data for Wetherill plot2					208Pb/232Th	2σx (%)	Dates									208Pb/232Th	2σx (ABS)	2σtotal (ABS)	Prob. Conc. (%)	% conc3	Comments	Accepted Dates4
Sample	Spot								238U/206Pb	2σx (%)	207Pb/206Pb	2σx (%)			207Pb/235Pb	2σx (%)	206Pb/238U	2σx (%)	Rho			207Pb/206Pb	2σx (ABS)	2σtotal (ABS)	206Pb/238U	2σx (ABS)	2σtotal (ABS)	207Pb/235Pb	2σx (ABS)	2σtotal (ABS)							Date (Ma)	2σx (ABS)	2σx (%)	2σtotal (ABS)	2σtotal (%)
UK056	UK056_59	NA	444	9180	1.8	0.0560748	NA	NA	63.1712	2.22896	0.0498	8.90803	NA	NA	0.108695	9.18266	0.01583	2.22896	0.016728	NA	NA	NA	NA	NA	101.247	2.23914	2.6184	104.771	9.14133	9.28874	NA	NA	NA	45.2887	NA		101.247	2.23914	2.21155	2.6184	2.58139
UK056	UK056_298	NA	264	5930	7.69	0.0507926	NA	NA	61.1995	2.24862	0.0485	9.76166	NA	NA	0.109269	10.0173	0.01634	2.24862	0.10077	NA	NA	NA	NA	NA	104.483	2.33049	2.71885	105.296	10.0197	10.1556	NA	NA	NA	87.1594	NA		104.483	2.33049	2.23049	2.71885	2.60157
UK056	UK056_295	NA	365	7650	11.14	0.0520561	NA	NA	60.5327	2.26455	0.0534	8.72008	NA	NA	0.121633	9.00933	0.01652	2.26455	-0.080563	NA	NA	NA	NA	NA	105.625	2.37244	2.76263	116.552	9.9206	10.0867	NA	NA	NA	3.61916	NA		105.625	2.37244	2.2461	2.76263	2.59699
UK056	UK056_73	NA	512	9990	17.1	0.0474604	NA	NA	60.3865	2.21934	0.0511	8.13808	NA	NA	0.116676	8.43527	0.01656	2.21934	0.17648	NA	NA	NA	NA	NA	105.878	2.33061	2.72855	112.054	8.94943	9.1202	NA	NA	NA	16.3589	NA		105.878	2.33061	2.20121	2.72855	2.57377
UK056	UK056_35	NA	112	2520	6.01	0.0469165	NA	NA	60.2773	2.46356	0.0486	11.4928	NA	NA	0.111169	11.7539	0.01659	2.46356	0.099166	NA	NA	NA	NA	NA	106.069	2.59168	2.95588	107.034	11.9409	12.0588	NA	NA	NA	87.1821	NA		106.069	2.59168	2.4434	2.95588	2.78612
UK056	UK056_157	NA	294	5600	12.2	0.0497959	NA	NA	60.1323	2.27232	0.0545	9.59056	NA	NA	0.124965	9.85608	0.01663	2.27232	0.0021501	NA	NA	NA	NA	NA	106.322	2.39617	2.78776	119.564	11.1174	11.2732	NA	NA	NA	2.05617	NA		106.322	2.39617	2.25368	2.78776	2.60796
UK056	UK056_245	NA	253	5500	7.76	0.0461905	NA	NA	60.1323	2.26264	0.0486	9.61642	NA	NA	0.111437	9.87902	0.01663	2.26264	0.0075552	NA	NA	NA	NA	NA	106.322	2.38596	2.779	107.279	10.0578	10.1981	NA	NA	NA	85.2926	NA		106.322	2.38596	2.24408	2.779	2.61253
UK056	UK056_33	NA	148	3360	4.74	0.0446748	NA	NA	59.7729	2.44466	0.0458	10.7859	NA	NA	0.105648	11.0595	0.01673	2.44466	0.15827	NA	NA	NA	NA	NA	106.956	2.59315	2.96286	101.977	10.7307	10.8503	NA	NA	NA	34.7818	NA		106.956	2.59315	2.4245	2.96286	2.77285
UK056	UK056_147	NA	214	4580	7.56	0.054	NA	NA	59.5238	2.25976	0.0469	9.43874	NA	NA	0.108638	9.70548	0.0168	2.25976	0.28935	NA	NA	NA	NA	NA	107.4	2.40688	2.8043	104.719	9.65725	9.79677	NA	NA	NA	56.1689	NA		107.4	2.40688	2.24104	2.8043	2.61038
UK056	UK056_179	NA	201	3950	9.63	0.049208	NA	NA	59.3824	2.41464	0.0533	10.3583	NA	NA	0.123757	10.636	0.01684	2.41464	-0.018403	NA	NA	NA	NA	NA	107.654	2.57786	2.954	118.473	11.894	12.0372	NA	NA	NA	7.79404	NA		107.654	2.57786	2.39459	2.954	2.73091
UK056	UK056_135	NA	731	15650	9.77	0.0524987	NA	NA	59.2417	2.19316	0.0487	7.73002	NA	NA	0.113345	8.03512	0.01688	2.19316	-0.073513	NA	NA	NA	NA	NA	107.907	2.34689	2.75651	109.021	8.30625	8.48075	NA	NA	NA	80.0216	NA		107.907	2.34689	2.17491	2.75651	2.55216
UK056	UK056_70	NA	299	6180	8.27	0.0435034	NA	NA	59.0319	2.24836	0.0495	9.0929	NA	NA	0.115617	9.36675	0.01694	2.24836	0.055679	NA	NA	NA	NA	NA	108.288	2.41437	2.81679	111.09	9.85683	10.0096	NA	NA	NA	57.6239	NA		108.288	2.41437	2.22959	2.81679	2.5982
UK056	UK056_68	NA	452	9490	17.4	0.047027	NA	NA	58.5823	2.2464	0.0481	8.70626	NA	NA	0.113209	8.9914	0.01707	2.2464	-0.042539	NA	NA	NA	NA	NA	109.112	2.43045	2.83621	108.896	9.2848	9.44091	NA	NA	NA	96.458	NA		109.112	2.43045	2.22749	2.83621	2.59974
UK056	UK056_125	NA	248	5190	4.28	0.0491954	NA	NA	58.1395	2.367	0.0511	9.61218	NA	NA	0.121185	9.89933	0.0172	2.367	0.20465	NA	NA	NA	NA	NA	109.936	2.58011	2.97088	116.146	10.8649	11.0158	NA	NA	NA	24.4484	NA		109.936	2.58011	2.34693	2.97088	2.7012
UK056	UK056_200	NA	186	4110	2.77	0.0568789	NA	NA	57.9039	2.33139	0.0502	10.4762	NA	NA	0.119536	10.7325	0.01727	2.33139	-0.086328	NA	NA	NA	NA	NA	110.379	2.55147	2.94898	114.651	11.6362	11.7738	NA	NA	NA	48.1871	NA		110.379	2.55147	2.31155	2.94898	2.66535
UK056	UK056_260	NA	49	880	1.01	0.0520619	NA	NA	57.8704	3.10369	0.057	15.1604	NA	NA	0.135806	15.4749	0.01728	3.10369	0.022167	NA	NA	NA	NA	NA	110.443	3.3986	3.70668	129.302	18.7898	18.8971	NA	NA	NA	4.9304	NA		110.443	3.3986	3.07726	3.70668	3.34068
UK056	UK056_92	NA	149	3080	2.98	0.0505085	NA	NA	57.7701	2.47634	0.0492	10.7569	NA	NA	0.117426	11.0383	0.01731	2.47634	0.010535	NA	NA	NA	NA	NA	110.633	2.71627	3.09429	112.736	11.7787	11.9104	NA	NA	NA	72.7513	NA		110.633	2.71627	2.45522	3.09429	2.79434
UK056	UK056_233	NA	494	10700	22.3	0.0513825	NA	NA	57.7701	2.20329	0.0496	8.4263	NA	NA	0.11838	8.70959	0.01731	2.20329	0.065952	NA	NA	NA	NA	NA	110.633	2.41676	2.835	113.603	9.36117	9.52882	NA	NA	NA	53.2863	NA		110.633	2.41676	2.18449	2.835	2.55925
UK056	UK056_86	NA	212	3980	5	0.0537634	NA	NA	57.7034	2.34089	0.0527	10.7286	NA	NA	0.125925	10.981	0.01733	2.34089	0.018481	NA	NA	NA	NA	NA	110.759	2.57061	2.96808	120.429	12.4708	12.6118	NA	NA	NA	12.907	NA		110.759	2.57061	2.32089	2.96808	2.67116
UK056	UK056_274	NA	151	3470	4.11	0.0587143	NA	NA	57.6701	2.81121	0.0526	12.224	NA	NA	0.125758	12.5431	0.01734	2.81121	-0.020427	NA	NA	NA	NA	NA	110.823	3.08884	3.42708	120.279	14.2284	14.3518	NA	NA	NA	19.7702	NA		110.823	3.08884	2.78719	3.42708	3.07972
UK056	UK056_20	NA	176	3990	8.08	0.0491783	NA	NA	57.0451	2.35807	0.0472	10.6241	NA	NA	0.114084	10.8827	0.01753	2.35807	-0.094513	NA	NA	NA	NA	NA	112.027	2.61885	3.01829	109.695	11.3159	11.4462	NA	NA	NA	69.3671	NA		112.027	2.61885	2.3377	3.01829	2.69813
UK056	UK056_91	NA	487	9740	17.3	0.0461333	NA	NA	56.9476	3.13308	0.0515	9.68682	NA	NA	0.12469	10.1809	0.01756	3.13308	0.12357	NA	NA	NA	NA	NA	112.217	3.48541	3.79571	119.315	11.4613	11.6119	NA	NA	NA	22.0816	NA		112.217	3.48541	3.10597	3.79571	3.37113
UK056	UK056_237	NA	147	3100	1.98	0.0427646	NA	NA	56.8182	2.35624	0.0515	11.0102	NA	NA	0.124974	11.2595	0.0176	2.35624	0.1085	NA	NA	NA	NA	NA	112.47	2.62708	3.02836	119.572	12.7014	12.838	NA	NA	NA	26.4527	NA		112.47	2.62708	2.3358	3.02836	2.68919
UK056	UK056_272	NA	133	2502	1.64	0.0541254	NA	NA	56.6893	2.57358	0.0554	11.9083	NA	NA	0.134744	12.1832	0.01764	2.57358	0.016381	NA	NA	NA	NA	NA	112.723	2.87581	3.24805	128.352	14.6904	14.8255	NA	NA	NA	3.75548	NA		112.723	2.87581	2.5512	3.24805	2.86821
UK056	UK056_117	NA	176	3730	3.74	0.0532006	NA	NA	55.7724	2.33716	0.048	10.673	NA	NA	0.118665	10.9259	0.01793	2.33716	0.16951	NA	NA	NA	NA	NA	114.56	2.65381	3.06537	113.861	11.7688	11.9031	NA	NA	NA	90.4155	NA		114.56	2.65381	2.31652	3.06537	2.67598
UK056	UK056_67	NA	1340	27900	29.9	0.052	NA	NA	55.3403	2.1896	0.0474	7.0487	NA	NA	0.118097	7.38096	0.01807	2.1896	0.21334	NA	NA	NA	NA	NA	115.447	2.50532	2.94392	113.345	7.91608	8.1128	NA	NA	NA	58.848	NA		115.447	2.50532	2.17011	2.94392	2.5516
UK056	UK056_238	NA	1324	29110	29.1	0.0513228	NA	NA	55.3097	2.17151	0.0486	7.07123	NA	NA	0.121154	7.39714	0.01808	2.17151	0.0032984	NA	NA	NA	NA	NA	115.51	2.48597	2.92791	116.117	8.1166	8.31743	NA	NA	NA	88.6171	NA		115.51	2.48597	2.15217	2.92791	2.53364
UK056	UK056_142	NA	224	4800	4.29	0.0588477	NA	NA	55.1876	2.29291	0.0487	9.73158	NA	NA	0.121671	9.99805	0.01812	2.29291	0.026543	NA	NA	NA	NA	NA	115.763	2.63066	3.05342	116.586	11.0125	11.1625	NA	NA	NA	88.3784	NA		115.763	2.63066	2.27244	3.05342	2.63673
UK056	UK056_37	NA	604	13060	10.89	0.0518571	NA	NA	55.0964	2.19542	0.0464	8.14364	NA	NA	0.116117	8.43438	0.01815	2.19542	-0.057059	NA	NA	NA	NA	NA	115.953	2.52291	2.96242	111.546	8.91005	9.0801	NA	NA	NA	34.7353	NA		115.953	2.52291	2.1758	2.96242	2.56332
UK056	UK056_282	NA	135	3100	1.9	0.0460048	NA	NA	54.4662	2.29785	0.0479	11.096	NA	NA	0.121258	11.3314	0.01836	2.29785	-0.19794	NA	NA	NA	NA	NA	117.283	2.67062	3.09809	116.212	12.4434	12.5756	NA	NA	NA	87.1337	NA		117.283	2.67062	2.27707	3.09809	2.64345
UK056	UK056_225	NA	126	3080	2.44	0.0513684	NA	NA	53.7346	2.492	0.0442	11.4651	NA	NA	0.113415	11.7328	0.01861	2.492	0.13428	NA	NA	NA	NA	NA	118.865	2.93498	3.33863	109.084	12.1357	12.2559	NA	NA	NA	10.4245	NA		118.865	2.93498	2.46917	3.33863	2.81497
UK056	UK056_169	NA	1484	32200	31.4	0.0547038	NA	NA	53.5045	2.17328	0.0494	6.94158	NA	NA	0.127303	7.27384	0.01869	2.17328	0.21926	NA	NA	NA	NA	NA	119.371	2.57041	3.02667	121.671	8.34066	8.55401	NA	NA	NA	57.3931	NA		119.371	2.57041	2.15329	3.02667	2.53413
UK056	UK056_4	NA	211	4680	3.25	0.0551783	NA	NA	53.2481	2.29928	0.0507	9.95837	NA	NA	0.131282	10.2204	0.01878	2.29928	-0.054028	NA	NA	NA	NA	NA	119.941	2.73228	3.16912	125.249	12.0434	12.2005	NA	NA	NA	39.6516	NA		119.941	2.73228	2.27802	3.16912	2.63537
UK056	UK056_15	NA	1508	33300	34.7	0.0530581	NA	NA	52.4934	2.1881	0.0486	6.88949	NA	NA	0.127653	7.22862	0.01905	2.1881	0.12184	NA	NA	NA	NA	NA	121.649	2.63685	3.09906	121.987	8.30905	8.52423	NA	NA	NA	93.5938	NA		121.649	2.63685	2.16759	3.09906	2.54711
UK056	UK056_115	NA	297	6010	5.95	0.0609631	NA	NA	52.4659	2.25946	0.0511	9.31518	NA	NA	0.13429	9.58529	0.01906	2.25946	-0.017838	NA	NA	NA	NA	NA	121.712	2.72425	3.17418	127.946	11.5232	11.6939	NA	NA	NA	29.5634	NA		121.712	2.72425	2.23827	3.17418	2.60048
UK056	UK056_5	NA	167	3760	2.4	0.0447761	NA	NA	52.0562	2.3588	0.047	10.6889	NA	NA	0.124488	10.9461	0.01921	2.3588	-0.077658	NA	NA	NA	NA	NA	122.661	2.86598	3.30286	119.132	12.305	12.445	NA	NA	NA	58.2242	NA		122.661	2.86598	2.3365	3.30286	2.69784
UK056	UK056_167	NA	1017	20910	32.8	0.0641879	NA	NA	43.9367	2.16221	0.0515	7.5685	NA	NA	0.161615	7.8713	0.02276	2.16221	0.11715	NA	NA	NA	NA	NA	145.076	3.10181	3.65762	152.116	11.1202	11.3636	NA	NA	NA	20.9692	NA		145.076	3.10181	2.13806	3.65762	2.51582
UK056	UK056_149	NA	561	10930	4.57	0.0830909	NA	NA	42.3729	2.35643	0.0552	8.27129	NA	NA	0.179619	8.6004	0.0236	2.35643	-0.0052062	NA	NA	NA	NA	NA	150.368	3.50231	4.0372	167.733	13.2979	13.5421	NA	NA	NA	1.22907	NA		150.368	3.50231	2.32916	4.0372	2.66502
UK056	UK056_132	NA	202	3860	5.07	0.0676903	NA	NA	42.1585	2.31434	0.0536	10.1182	NA	NA	0.1753	10.3795	0.02372	2.31434	-0.18646	NA	NA	NA	NA	NA	151.124	3.45683	4.00283	164.008	15.7207	15.9195	NA	NA	NA	12.5136	NA		151.124	3.45683	2.28742	4.00283	2.63117
UK056	UK056_252	NA	130	2500	2	0.0673401	NA	NA	42.1053	2.45127	0.0554	11.3882	NA	NA	0.181416	11.649	0.02375	2.45127	0.11117	NA	NA	NA	NA	NA	151.313	3.66589	4.1859	169.278	18.1651	18.3477	NA	NA	NA	4.93543	NA		151.313	3.66589	2.42272	4.1859	2.76065
UK056	UK056_229	NA	689	15770	22.8	0.0714286	NA	NA	41.6146	2.20688	0.0486	7.93868	NA	NA	0.161024	8.23972	0.02403	2.20688	0.14189	NA	NA	NA	NA	NA	153.075	3.3384	3.91439	151.599	11.6041	11.8361	NA	NA	NA	79.9152	NA		153.075	3.3384	2.18088	3.91439	2.5582
UK056	UK056_266	NA	441	9840	19.6	0.0697509	NA	NA	41.5282	2.21187	0.0497	8.42915	NA	NA	0.165011	8.71453	0.02408	2.21187	-0.012556	NA	NA	NA	NA	NA	153.39	3.35274	3.92879	155.08	12.5337	12.7579	NA	NA	NA	79.5201	NA		153.39	3.35274	2.18576	3.92879	2.55935
UK056	UK056_290	NA	651	13750	22.4	0.0738786	NA	NA	41.3907	2.18604	0.0504	7.95469	NA	NA	0.167892	8.2496	0.02416	2.18604	0.24634	NA	NA	NA	NA	NA	153.894	3.32434	3.90808	157.587	12.0423	12.2825	NA	NA	NA	52.7671	NA		153.894	3.32434	2.16015	3.90808	2.53895
UK056	UK056_121	NA	733	15010	29.1	0.0699519	NA	NA	41.3052	2.18575	0.0499	7.88835	NA	NA	0.16657	8.18557	0.02421	2.18575	0.11417	NA	NA	NA	NA	NA	154.208	3.33062	3.9156	156.438	11.8682	12.1086	NA	NA	NA	70.9444	NA		154.208	3.33062	2.15981	3.9156	2.53748
UK056	UK056_57	NA	1790	35710	48.8	0.0693182	NA	NA	41.2882	2.29206	0.0511	7.21846	NA	NA	0.170646	7.57362	0.02422	2.29206	0.012077	NA	NA	NA	NA	NA	154.271	3.49402	4.05592	159.979	11.2104	11.4752	NA	NA	NA	33.0388	NA		154.271	3.49402	2.26485	4.05592	2.62083
UK056	UK056_268	NA	445	10350	13.8	0.0683168	NA	NA	41.0341	2.22051	0.0485	8.48263	NA	NA	0.162967	8.76845	0.02437	2.22051	0.22797	NA	NA	NA	NA	NA	155.215	3.40541	3.9863	153.297	12.4769	12.6974	NA	NA	NA	75.2102	NA		155.215	3.40541	2.19399	3.9863	2.56865
UK056	UK056_202	NA	794	17460	29.9	0.0727494	NA	NA	40.7498	2.17941	0.0478	7.63975	NA	NA	0.161735	7.94454	0.02454	2.17941	0.14287	NA	NA	NA	NA	NA	156.285	3.36514	3.95937	152.221	11.2309	11.4722	NA	NA	NA	46.928	NA		156.285	3.36514	2.15321	3.95937	2.53654
UK056	UK056_101	NA	287	6130	10.75	0.068778	NA	NA	40.7332	2.30884	0.048	8.99534	NA	NA	0.162478	9.28692	0.02455	2.30884	0.056337	NA	NA	NA	NA	NA	156.348	3.5664	4.1322	152.87	13.1806	13.3884	NA	NA	NA	60.4678	NA		156.348	3.5664	2.28106	4.1322	2.64624
UK056	UK056_222	NA	337	6790	8.76	0.0702486	NA	NA	40.6504	2.27999	0.0523	9.07282	NA	NA	0.177394	9.35491	0.0246	2.27999	-0.044572	NA	NA	NA	NA	NA	156.663	3.52883	4.10194	165.815	14.3125	14.5349	NA	NA	NA	22.0808	NA		156.663	3.52883	2.25251	4.10194	2.60833
UK056	UK056_50	NA	301	6060	11.6	0.0686391	NA	NA	40.6339	2.24756	0.0481	9.56519	NA	NA	0.163214	9.8257	0.02461	2.24756	-0.12697	NA	NA	NA	NA	NA	156.726	3.48003	4.06046	153.513	13.9997	14.1971	NA	NA	NA	66.4762	NA		156.726	3.48003	2.22046	4.06046	2.59524
UK056	UK056_79	NA	812	16580	15.3	0.069863	NA	NA	40.5844	2.19262	0.0504	7.63698	NA	NA	0.171227	7.94551	0.02464	2.19262	0.055949	NA	NA	NA	NA	NA	156.914	3.399	3.99253	160.483	11.7951	12.0485	NA	NA	NA	55.5541	NA		156.914	3.399	2.16615	3.99253	2.54074
UK056	UK056_71	NA	581	11510	17.2	0.0757709	NA	NA	40.568	2.22937	0.0503	8.18964	NA	NA	0.170957	8.48765	0.02465	2.22937	0.040635	NA	NA	NA	NA	NA	156.977	3.45733	4.04274	160.249	12.583	12.8202	NA	NA	NA	61.2839	NA		156.977	3.45733	2.20244	4.04274	2.57211
UK056	UK056_72	NA	479	9740	12.05	0.0767516	NA	NA	40.3551	2.2913	0.049	8.43542	NA	NA	0.167417	8.74108	0.02478	2.2913	0.10939	NA	NA	NA	NA	NA	157.795	3.57166	4.14641	157.175	12.7289	12.9552	NA	NA	NA	92.2968	NA		157.795	3.57166	2.26348	4.14641	2.62821
UK056	UK056_289	NA	716	15330	8.5	0.0670876	NA	NA	40.3551	2.17818	0.051	7.79808	NA	NA	0.17425	8.09658	0.02478	2.17818	-0.015031	NA	NA	NA	NA	NA	157.795	3.39534	3.99553	163.101	12.2001	12.4526	NA	NA	NA	40.4927	NA		157.795	3.39534	2.15174	3.99553	2.52576
UK056	UK056_97	NA	219	4490	7.96	0.0753788	NA	NA	40.3388	2.2843	0.0496	9.67398	NA	NA	0.169535	9.94001	0.02479	2.2843	0.14125	NA	NA	NA	NA	NA	157.858	3.56215	4.13864	159.015	14.6316	14.8333	NA	NA	NA	87.3757	NA		157.858	3.56215	2.25655	4.13864	2.62127
UK056	UK056_182	NA	289	6230	10.62	0.073444	NA	NA	40.3226	2.22242	0.0488	9.35015	NA	NA	0.166868	9.61064	0.0248	2.22242	0.2187	NA	NA	NA	NA	NA	157.921	3.46702	4.05748	156.697	13.956	14.1616	NA	NA	NA	85.7343	NA		157.921	3.46702	2.19542	4.05748	2.56947
UK056	UK056_297	NA	756	15780	21.26	0.0759828	NA	NA	40.3226	2.19163	0.0517	7.68337	NA	NA	0.176784	7.98983	0.0248	2.19163	-0.19771	NA	NA	NA	NA	NA	157.921	3.419	4.01652	165.29	12.1881	12.447	NA	NA	NA	26.8933	NA		157.921	3.419	2.16501	4.01652	2.53014
UK056	UK056_83	NA	448	8550	10.9	0.0786436	NA	NA	40.2576	2.22766	0.0517	8.53272	NA	NA	0.177069	8.81872	0.02484	2.22766	0.16929	NA	NA	NA	NA	NA	158.172	3.48067	4.07087	165.536	13.4711	13.7065	NA	NA	NA	27.0924	NA		158.172	3.48067	2.20056	4.07087	2.57094
UK056	UK056_63	NA	410	8970	16.22	0.0717382	NA	NA	40.2253	2.23319	0.0473	8.4874	NA	NA	0.16213	8.77628	0.02486	2.23319	0.27548	NA	NA	NA	NA	NA	158.298	3.49205	4.08146	152.566	12.4329	12.6522	NA	NA	NA	33.6063	NA		158.298	3.49205	2.20599	4.08146	2.57853
UK056	UK056_173	NA	829	17980	25.9	0.0764237	NA	NA	40.1445	2.18187	0.0493	7.57924	NA	NA	0.169325	7.88704	0.02491	2.18187	0.34016	NA	NA	NA	NA	NA	158.613	3.4185	4.02089	158.833	11.5971	11.8499	NA	NA	NA	96.7783	NA		158.613	3.4185	2.15525	4.02089	2.53509
UK056	UK056_254	NA	1129	24830	49.7	0.0733038	NA	NA	40.0962	2.19553	0.0492	7.22764	NA	NA	0.169185	7.55375	0.02494	2.19553	0.16473	NA	NA	NA	NA	NA	158.801	3.44394	4.04385	158.712	11.0991	11.3626	NA	NA	NA	98.7062	NA		158.801	3.44394	2.16871	4.04385	2.54654
UK056	UK056_78	NA	203	4190	6.25	0.0748503	NA	NA	40.0481	2.34711	0.048	10.0419	NA	NA	0.165257	10.3125	0.02497	2.34711	0.064001	NA	NA	NA	NA	NA	158.99	3.68602	4.25315	155.295	14.8513	15.0415	NA	NA	NA	62.326	NA		158.99	3.68602	2.3184	4.25315	2.67789
UK056	UK056_93	NA	287	5150	6.69	0.0756787	NA	NA	40.0481	2.30975	0.0554	9.69617	NA	NA	0.190735	9.96748	0.02497	2.30975	-0.025311	NA	NA	NA	NA	NA	158.99	3.62736	4.20242	177.256	16.2131	16.4353	NA	NA	NA	3.00314	NA		158.99	3.62736	2.2815	4.20242	2.6277
UK056	UK056_172	NA	447	9380	12.3	0.072997	NA	NA	40.032	2.21552	0.0513	8.65206	NA	NA	0.17669	8.93121	0.02498	2.21552	0.012636	NA	NA	NA	NA	NA	159.053	3.48073	4.07695	165.208	13.6181	13.8501	NA	NA	NA	38.0949	NA		159.053	3.48073	2.18841	4.07695	2.55751
UK056	UK056_259	NA	211	4650	6.87	0.0778029	NA	NA	40.032	2.33924	0.0523	10.1419	NA	NA	0.180134	10.4081	0.02498	2.33924	0.13849	NA	NA	NA	NA	NA	159.053	3.67511	4.24411	168.176	16.1326	16.3354	NA	NA	NA	25.7398	NA		159.053	3.67511	2.31062	4.24411	2.6653
UK056	UK056_213	NA	231	5160	7.65	0.0765	NA	NA	40.016	2.32403	0.0505	10.4002	NA	NA	0.174004	10.6567	0.02499	2.32403	-0.063512	NA	NA	NA	NA	NA	159.116	3.65264	4.22509	162.888	16.039	16.2314	NA	NA	NA	65.1477	NA		159.116	3.65264	2.29559	4.22509	2.65151
UK056	UK056_84	NA	564	11650	15.23	0.0715023	NA	NA	40	2.21011	0.0501	8.18833	NA	NA	0.172695	8.48136	0.025	2.21011	-0.074636	NA	NA	NA	NA	NA	159.179	3.47495	4.07288	161.755	12.6827	12.9221	NA	NA	NA	70.0864	NA		159.179	3.47495	2.18305	4.07288	2.55515
UK056	UK056_95	NA	730	14340	28.4	0.0763441	NA	NA	40	2.21011	0.0517	7.6651	NA	NA	0.17821	7.97736	0.025	2.21011	0.1228	NA	NA	NA	NA	NA	159.179	3.47495	4.07288	166.519	12.2523	12.5135	NA	NA	NA	23.4873	NA		159.179	3.47495	2.18305	4.07288	2.55345
UK056	UK056_26	NA	481	10300	13.5	0.0695876	NA	NA	39.984	2.20492	0.05	8.51212	NA	NA	0.172419	8.79305	0.02501	2.20492	0.0094147	NA	NA	NA	NA	NA	159.242	3.46814	4.0675	161.516	13.1309	13.3617	NA	NA	NA	73.7327	NA		159.242	3.46814	2.17791	4.0675	2.552
UK056	UK056_81	NA	308	5960	6.58	0.0700745	NA	NA	39.984	2.30205	0.0527	9.3381	NA	NA	0.18173	9.61767	0.02501	2.30205	-0.063389	NA	NA	NA	NA	NA	159.242	3.62092	4.19853	169.548	15.0189	15.2399	NA	NA	NA	19.0325	NA		159.242	3.62092	2.27385	4.19853	2.62525
UK056	UK056_183	NA	930	20400	48.8	0.0756589	NA	NA	39.984	2.18134	0.0498	7.4429	NA	NA	0.171729	7.75597	0.02501	2.18134	0.12666	NA	NA	NA	NA	NA	159.242	3.43106	4.03594	160.919	11.5425	11.8026	NA	NA	NA	77.2984	NA		159.242	3.43106	2.15462	4.03594	2.53314
UK056	UK056_257	NA	376	8530	14.66	0.0751025	NA	NA	39.984	2.24949	0.0481	8.95964	NA	NA	0.165867	9.23771	0.02501	2.24949	-0.032059	NA	NA	NA	NA	NA	159.242	3.53824	4.12744	155.826	13.3454	13.558	NA	NA	NA	62.2945	NA		159.242	3.53824	2.22193	4.12744	2.59599
UK056	UK056_18	NA	508	10140	12.47	0.0726267	NA	NA	39.9521	2.20478	0.0522	8.304	NA	NA	0.180149	8.59171	0.02503	2.20478	-0.05777	NA	NA	NA	NA	NA	159.367	3.47062	4.07049	168.189	13.3177	13.5628	NA	NA	NA	20.7794	NA		159.367	3.47062	2.17775	4.07049	2.54362
UK056	UK056_177	NA	678	13740	16.4	0.0713043	NA	NA	39.9521	2.1998	0.0532	7.84131	NA	NA	0.1836	8.14404	0.02503	2.1998	0.1882	NA	NA	NA	NA	NA	159.367	3.46279	4.06381	171.154	12.8281	13.0905	NA	NA	NA	6.36831	NA		159.367	3.46279	2.17283	4.06381	2.54587
UK056	UK056_17	NA	735	15540	21.1	0.075089	NA	NA	39.9361	2.22041	0.0493	7.89861	NA	NA	0.170209	8.20477	0.02504	2.22041	0.13263	NA	NA	NA	NA	NA	159.43	3.4966	4.09309	159.6	12.1181	12.3624	NA	NA	NA	97.77	NA		159.43	3.4966	2.19318	4.09309	2.5672
UK056	UK056_218	NA	461	10110	12.3	0.0763027	NA	NA	39.9042	2.21489	0.0498	8.45124	NA	NA	0.172073	8.73665	0.02506	2.21489	0.14753	NA	NA	NA	NA	NA	159.556	3.49062	4.08885	161.216	13.0243	13.2562	NA	NA	NA	79.823	NA		159.556	3.49062	2.1877	4.08885	2.56177
UK056	UK056_64	NA	563	11680	16.89	0.0692497	NA	NA	39.8883	2.19953	0.0501	8.15748	NA	NA	0.173178	8.44882	0.02507	2.19953	0.15192	NA	NA	NA	NA	NA	159.619	3.46777	4.06979	162.173	12.6642	12.9051	NA	NA	NA	68.5758	NA		159.619	3.46777	2.17253	4.06979	2.54833
UK056	UK056_107	NA	682	14520	18.2	0.0759916	NA	NA	39.8883	2.19001	0.0493	7.8417	NA	NA	0.170413	8.14177	0.02507	2.19001	0.067578	NA	NA	NA	NA	NA	159.619	3.45276	4.05701	159.777	12.0374	12.2838	NA	NA	NA	97.9472	NA		159.619	3.45276	2.16312	4.05701	2.54153
UK056	UK056_170	NA	650	14000	18.1	0.0772844	NA	NA	39.8883	2.19001	0.0482	7.90484	NA	NA	0.166611	8.2026	0.02507	2.19001	0.032811	NA	NA	NA	NA	NA	159.619	3.45276	4.05701	156.473	11.8954	12.1353	NA	NA	NA	60.7824	NA		159.619	3.45276	2.16312	4.05701	2.54522
UK056	UK056_208	NA	674	14960	18.6	0.0780201	NA	NA	39.8883	2.23126	0.0483	7.86965	NA	NA	0.166956	8.17985	0.02507	2.23126	0.060765	NA	NA	NA	NA	NA	159.619	3.51779	4.1125	156.774	11.8835	12.1245	NA	NA	NA	64.0139	NA		159.619	3.51779	2.20387	4.1125	2.5795
UK056	UK056_143	NA	206	4530	6.23	0.0791614	NA	NA	39.8248	2.40944	0.0482	10.2068	NA	NA	0.166876	10.4873	0.02511	2.40944	0.073503	NA	NA	NA	NA	NA	159.871	3.80462	4.362	156.705	15.2299	15.4185	NA	NA	NA	68.0966	NA		159.871	3.80462	2.37981	4.362	2.73079
UK056	UK056_191	NA	315	6610	6.55	0.0833333	NA	NA	39.8089	2.23081	0.0471	9.0833	NA	NA	0.163133	9.35323	0.02512	2.23081	-0.075745	NA	NA	NA	NA	NA	159.933	3.52392	4.11989	153.442	13.3207	13.5279	NA	NA	NA	35.3601	NA		159.933	3.52392	2.20337	4.11989	2.58457
UK056	UK056_192	NA	428	8930	10.32	0.0739785	NA	NA	39.8089	2.25444	0.0524	8.66072	NA	NA	0.18149	8.94933	0.02512	2.25444	0.096373	NA	NA	NA	NA	NA	159.933	3.56124	4.15185	169.342	13.9595	14.1964	NA	NA	NA	18.2953	NA		159.933	3.56124	2.2267	4.15185	2.59002
UK056	UK056_24	NA	591	12400	15.27	0.0711225	NA	NA	39.7772	2.22505	0.0493	8.23347	NA	NA	0.170889	8.52883	0.02514	2.22505	0.079694	NA	NA	NA	NA	NA	160.059	3.51755	4.1153	160.19	12.6398	12.8758	NA	NA	NA	98.3765	NA		160.059	3.51755	2.19765	4.1153	2.571
UK056	UK056_156	NA	234	4620	8.96	0.0759966	NA	NA	39.7614	2.3215	0.0531	9.87199	NA	NA	0.184134	10.1413	0.02515	2.3215	-0.02804	NA	NA	NA	NA	NA	160.122	3.67144	4.24801	171.612	16.0137	16.2257	NA	NA	NA	16.657	NA		160.122	3.67144	2.2929	4.24801	2.64263
UK056	UK056_240	NA	386	8350	11.75	0.0746032	NA	NA	39.7456	2.293	0.0506	8.73876	NA	NA	0.175534	9.03459	0.02516	2.293	0.13901	NA	NA	NA	NA	NA	160.185	3.62778	4.21075	164.211	13.6991	13.9272	NA	NA	NA	55.6727	NA		160.185	3.62778	2.26474	4.21075	2.62649
UK056	UK056_28	NA	190	4020	5.9	0.0690058	NA	NA	39.6983	2.32822	0.0514	10.4307	NA	NA	0.178522	10.6874	0.02519	2.32822	-0.034018	NA	NA	NA	NA	NA	160.374	3.68779	4.26381	166.788	16.4398	16.6359	NA	NA	NA	45.0903	NA		160.374	3.68779	2.2995	4.26381	2.65295
UK056	UK056_204	NA	438	9420	14.2	0.079865	NA	NA	39.6983	2.24762	0.0507	8.61596	NA	NA	0.176091	8.9043	0.02519	2.24762	0.02058	NA	NA	NA	NA	NA	160.374	3.56013	4.15389	164.691	13.5379	13.77	NA	NA	NA	53.597	NA		160.374	3.56013	2.2199	4.15389	2.58596
UK056	UK056_276	NA	582	12520	13.3	0.0734807	NA	NA	39.6983	2.23018	0.0512	7.93368	NA	NA	0.177828	8.24118	0.02519	2.23018	0.15425	NA	NA	NA	NA	NA	160.374	3.5325	4.13024	166.19	12.6345	12.887	NA	NA	NA	35.6544	NA		160.374	3.5325	2.20267	4.13024	2.57214
UK056	UK056_110	NA	294	6560	10.99	0.0711788	NA	NA	39.6825	2.24752	0.0461	9.27203	NA	NA	0.160178	9.54054	0.0252	2.24752	-0.10122	NA	NA	NA	NA	NA	160.437	3.56134	4.15535	150.859	13.3754	13.5753	NA	NA	NA	17.5187	NA		160.437	3.56134	2.21978	4.15535	2.60368
UK056	UK056_236	NA	599	12880	15.31	0.0740687	NA	NA	39.6825	2.22454	0.0506	8.08962	NA	NA	0.175814	8.3899	0.0252	2.22454	-0.022636	NA	NA	NA	NA	NA	160.437	3.52492	4.12418	164.452	12.7387	12.9844	NA	NA	NA	54.646	NA		160.437	3.52492	2.19708	4.12418	2.56574
UK056	UK056_89	NA	834	18140	31	0.070104	NA	NA	39.6511	2.19378	0.0477	7.59681	NA	NA	0.165869	7.90722	0.02522	2.19378	-0.13495	NA	NA	NA	NA	NA	160.562	3.47887	4.08576	155.827	11.4232	11.6709	NA	NA	NA	44.3543	NA		160.562	3.47887	2.16668	4.08576	2.55327
UK056	UK056_164	NA	273	5420	8.6	0.0771993	NA	NA	39.6354	2.29205	0.0521	9.64333	NA	NA	0.181241	9.91198	0.02523	2.29205	-0.0021101	NA	NA	NA	NA	NA	160.625	3.63612	4.22088	169.128	15.4434	15.6573	NA	NA	NA	28.5796	NA		160.625	3.63612	2.26373	4.22088	2.62052
UK056	UK056_87	NA	466	8850	11.1	0.0761839	NA	NA	39.604	2.2592	0.0528	8.37275	NA	NA	0.183822	8.6722	0.02525	2.2592	0.12164	NA	NA	NA	NA	NA	160.751	3.58678	4.1793	171.344	13.674	13.921	NA	NA	NA	12.4021	NA		160.751	3.58678	2.23127	4.1793	2.59373
UK056	UK056_9	NA	474	9780	9.94	0.0688843	NA	NA	39.5883	2.22403	0.0497	8.60953	NA	NA	0.173098	8.89215	0.02526	2.22403	-0.050612	NA	NA	NA	NA	NA	160.814	3.5323	4.13307	162.104	13.3235	13.5525	NA	NA	NA	85.3417	NA		160.814	3.5323	2.19652	4.13307	2.56853
UK056	UK056_273	NA	489	11100	19.2	0.070073	NA	NA	39.5883	2.22403	0.0501	8.38831	NA	NA	0.174491	8.67813	0.02526	2.22403	0.0038242	NA	NA	NA	NA	NA	160.814	3.5323	4.13307	163.309	13.0919	13.3281	NA	NA	NA	71.2897	NA		160.814	3.5323	2.19652	4.13307	2.56744
UK056	UK056_131	NA	540	11950	15.4	0.0765027	NA	NA	39.5726	2.22394	0.0475	8.03177	NA	NA	0.165501	8.33398	0.02527	2.22394	0.20499	NA	NA	NA	NA	NA	160.877	3.53353	4.13455	155.507	12.0168	12.2517	NA	NA	NA	36.1939	NA		160.877	3.53353	2.19642	4.13455	2.57239
UK056	UK056_196	NA	245	5090	8.69	0.0831579	NA	NA	39.5726	2.27814	0.0519	9.5913	NA	NA	0.180831	9.85814	0.02527	2.27814	-0.025697	NA	NA	NA	NA	NA	160.877	3.61965	4.20839	168.776	15.3301	15.5448	NA	NA	NA	32.0283	NA		160.877	3.61965	2.24995	4.20839	2.60857
UK056	UK056_171	NA	1189	25800	55.1	0.0746612	NA	NA	39.557	2.17573	0.0497	7.12966	NA	NA	0.173235	7.45425	0.02528	2.17573	-0.12902	NA	NA	NA	NA	NA	160.94	3.45826	4.07085	162.222	11.1764	11.4488	NA	NA	NA	83.2413	NA		160.94	3.45826	2.1488	4.07085	2.52711
UK056	UK056_158	NA	386	7820	13.25	0.0725233	NA	NA	39.5257	2.20791	0.0518	8.70611	NA	NA	0.180697	8.98172	0.0253	2.20791	-0.049638	NA	NA	NA	NA	NA	161.065	3.51211	4.11756	168.66	13.9582	14.1934	NA	NA	NA	29.8399	NA		161.065	3.51211	2.18055	4.11756	2.54816
UK056	UK056_22	NA	748	16360	22.5	0.0688073	NA	NA	39.4945	2.18409	0.0477	7.61508	NA	NA	0.166527	7.9221	0.02532	2.18409	0.35827	NA	NA	NA	NA	NA	161.191	3.4769	4.08844	156.4	11.4836	11.7317	NA	NA	NA	37.1109	NA		161.191	3.4769	2.15701	4.08844	2.53498
UK056	UK056_54	NA	288	6340	5.3	0.0773723	NA	NA	39.4633	2.26444	0.0448	9.0886	NA	NA	0.156526	9.36645	0.02534	2.26444	0.060671	NA	NA	NA	NA	NA	161.317	3.6076	4.201	147.658	12.8724	13.072	NA	NA	NA	3.6706	NA		161.317	3.6076	2.23635	4.201	2.61754
UK056	UK056_219	NA	771	16340	34.7	0.0757642	NA	NA	39.4477	2.1754	0.0508	7.67808	NA	NA	0.177559	7.98031	0.02535	2.1754	0.0041794	NA	NA	NA	NA	NA	161.38	3.46708	4.0814	165.958	12.2189	12.4791	NA	NA	NA	47.1302	NA		161.38	3.46708	2.1484	4.0814	2.52383
UK056	UK056_198	NA	214	4920	5.87	0.0731009	NA	NA	39.4166	2.35546	0.0461	10.6287	NA	NA	0.161259	10.8865	0.02537	2.35546	0.0069141	NA	NA	NA	NA	NA	161.505	3.75694	4.33115	151.804	15.3514	15.5279	NA	NA	NA	21.6843	NA		161.505	3.75694	2.3262	4.33115	2.69076
UK056	UK056_58	NA	503	9130	10.22	0.0714685	NA	NA	39.3856	2.20726	0.0547	8.26229	NA	NA	0.191492	8.55204	0.02539	2.20726	-0.0012992	NA	NA	NA	NA	NA	161.631	3.52327	4.13097	177.902	13.9568	14.216	NA	NA	NA	2.48228	NA		161.631	3.52327	2.17982	4.13097	2.54073
UK056	UK056_175	NA	372	8060	11.09	0.0770674	NA	NA	39.3701	2.23393	0.0484	8.95875	NA	NA	0.169504	9.23307	0.0254	2.23393	-0.0057258	NA	NA	NA	NA	NA	161.694	3.56721	4.16893	158.989	13.5888	13.8056	NA	NA	NA	70.0187	NA		161.694	3.56721	2.20615	4.16893	2.58113
UK056	UK056_185	NA	554	11000	17.9	0.0758475	NA	NA	39.3701	2.25755	0.0522	8.04541	NA	NA	0.182812	8.35614	0.0254	2.25755	0.25431	NA	NA	NA	NA	NA	161.694	3.60493	4.20126	170.478	13.1144	13.3694	NA	NA	NA	16.7913	NA		161.694	3.60493	2.22948	4.20126	2.59752
UK056	UK056_12	NA	550	11720	13.29	0.065468	NA	NA	39.3546	2.25744	0.0501	8.70515	NA	NA	0.175527	8.9931	0.02541	2.25744	0.01094	NA	NA	NA	NA	NA	161.757	3.60614	4.20272	164.204	13.6357	13.8649	NA	NA	NA	72.8126	NA		161.757	3.60614	2.22936	4.20272	2.5957
UK056	UK056_53	NA	575	11520	20.4	0.0748075	NA	NA	39.3082	2.22798	0.0521	8.43487	NA	NA	0.182749	8.72416	0.02544	2.22798	0.099304	NA	NA	NA	NA	NA	161.945	3.56317	4.1672	170.424	13.6881	13.9324	NA	NA	NA	22.0835	NA		161.945	3.56317	2.20023	4.1672	2.56776
UK056	UK056_60	NA	400	8220	17.1	0.074026	NA	NA	39.3082	2.25712	0.0491	8.78704	NA	NA	0.172226	9.0723	0.02544	2.25712	0.18272	NA	NA	NA	NA	NA	161.945	3.60977	4.20711	161.349	13.5351	13.7587	NA	NA	NA	92.8845	NA		161.945	3.60977	2.229	4.20711	2.59808
UK056	UK056_212	NA	480	10290	14.53	0.0865912	NA	NA	39.3082	2.25105	0.0486	8.48033	NA	NA	0.170473	8.77401	0.02544	2.25105	-0.092786	NA	NA	NA	NA	NA	161.945	3.60006	4.19878	159.829	12.9761	13.2052	NA	NA	NA	75.8573	NA		161.945	3.60006	2.22301	4.19878	2.59581
UK056	UK056_65	NA	443	9300	10.1	0.0716312	NA	NA	39.2773	2.21703	0.0488	8.74098	NA	NA	0.171309	9.01776	0.02546	2.21703	0.14476	NA	NA	NA	NA	NA	162.071	3.54838	4.15542	160.554	13.3925	13.6164	NA	NA	NA	82.0057	NA		162.071	3.54838	2.1894	4.15542	2.56472
UK056	UK056_130	NA	601	13560	25.7	0.0753666	NA	NA	39.2619	2.18328	0.0461	8.05003	NA	NA	0.161894	8.34085	0.02547	2.18328	0.056343	NA	NA	NA	NA	NA	162.134	3.4957	4.11096	152.36	11.8011	12.0314	NA	NA	NA	10.5223	NA		162.134	3.4957	2.15606	4.11096	2.54603
UK056	UK056_215	NA	342	7590	10.01	0.0798883	NA	NA	39.2465	2.23889	0.049	8.97832	NA	NA	0.172146	9.25326	0.02548	2.23889	-0.20994	NA	NA	NA	NA	NA	162.197	3.58611	4.18854	161.28	13.7996	14.0188	NA	NA	NA	90.2412	NA		162.197	3.58611	2.21096	4.18854	2.5839
UK056	UK056_241	NA	915	19800	28.9	0.0783198	NA	NA	39.2465	2.18323	0.0508	7.52417	NA	NA	0.17847	7.83452	0.02548	2.18323	-0.022094	NA	NA	NA	NA	NA	162.197	3.49696	4.11247	166.743	12.0478	12.3139	NA	NA	NA	47.2039	NA		162.197	3.49696	2.15599	4.11247	2.52965
UK056	UK056_265	NA	289	5800	9.15	0.0749386	NA	NA	39.2311	2.32345	0.055	9.79346	NA	NA	0.193301	10.0653	0.02549	2.32345	0.10548	NA	NA	NA	NA	NA	162.26	3.72297	4.30672	179.442	16.5569	16.7794	NA	NA	NA	3.97898	NA		162.26	3.72297	2.29445	4.30672	2.64699
UK056	UK056_168	NA	782	15790	29.8	0.0770026	NA	NA	39.2157	2.21154	0.0524	7.72377	NA	NA	0.184235	8.03415	0.0255	2.21154	-0.13497	NA	NA	NA	NA	NA	162.323	3.54501	4.15427	171.698	12.6919	12.9586	NA	NA	NA	17.0492	NA		162.323	3.54501	2.18393	4.15427	2.54464
UK056	UK056_82	NA	284	5660	6.71	0.073494	NA	NA	39.1696	2.2623	0.0483	9.47435	NA	NA	0.17002	9.7407	0.02553	2.2623	-0.06678	NA	NA	NA	NA	NA	162.511	3.63053	4.22876	159.436	14.3733	14.5794	NA	NA	NA	68.2537	NA		162.511	3.63053	2.23402	4.22876	2.60577
UK056	UK056_234	NA	751	15910	35.7	0.0759574	NA	NA	39.1696	2.20135	0.0504	7.99081	NA	NA	0.177412	8.28848	0.02553	2.20135	0.10869	NA	NA	NA	NA	NA	162.511	3.53273	4.14509	165.831	12.6818	12.9324	NA	NA	NA	60.4177	NA		162.511	3.53273	2.17384	4.14509	2.54824
UK056	UK056_190	NA	395	7870	10.63	0.0750176	NA	NA	39.1389	2.23257	0.0503	8.95479	NA	NA	0.177199	9.22891	0.02555	2.23257	-0.046157	NA	NA	NA	NA	NA	162.637	3.58556	4.19107	165.647	14.1065	14.3317	NA	NA	NA	68.2806	NA		162.637	3.58556	2.20464	4.19107	2.57362
UK056	UK056_250	NA	363	8570	11.53	0.0779054	NA	NA	39.1389	2.24991	0.0469	9.08199	NA	NA	0.165221	9.35653	0.02555	2.24991	0.19453	NA	NA	NA	NA	NA	162.637	3.61342	4.21492	155.263	13.4718	13.6812	NA	NA	NA	26.4054	NA		162.637	3.61342	2.22177	4.21492	2.59409
UK056	UK056_256	NA	607	13300	22.8	0.0714734	NA	NA	39.1236	2.22695	0.0493	8.00931	NA	NA	0.173744	8.31314	0.02556	2.22695	0.013448	NA	NA	NA	NA	NA	162.7	3.5779	4.18494	162.663	12.4955	12.7409	NA	NA	NA	99.5432	NA		162.7	3.5779	2.19908	4.18494	2.57223
UK056	UK056_258	NA	266	6070	7.96	0.0746717	NA	NA	39.1236	2.28107	0.049	9.59368	NA	NA	0.172686	9.86114	0.02556	2.28107	-0.17854	NA	NA	NA	NA	NA	162.7	3.66485	4.25952	161.748	14.7456	14.9521	NA	NA	NA	90.4128	NA		162.7	3.66485	2.25253	4.25952	2.61944
UK056	UK056_51	NA	736	15480	21.2	0.0704319	NA	NA	39.032	2.17825	0.0474	7.71494	NA	NA	0.16744	8.01655	0.02562	2.17825	-0.068816	NA	NA	NA	NA	NA	163.077	3.50768	4.12769	157.195	11.6751	11.9215	NA	NA	NA	34.2358	NA		163.077	3.50768	2.15093	4.12769	2.54017
UK056	UK056_279	NA	412	9360	12.55	0.0812298	NA	NA	39.032	2.21579	0.0478	8.64702	NA	NA	0.168853	8.92641	0.02562	2.21579	0.046623	NA	NA	NA	NA	NA	163.077	3.56812	4.17917	158.423	13.0942	13.3176	NA	NA	NA	48.6709	NA		163.077	3.56812	2.188	4.17917	2.56703
UK056	UK056_161	NA	583	11680	18.4	0.0843263	NA	NA	38.9408	2.17796	0.0524	8.05015	NA	NA	0.185536	8.33957	0.02568	2.17796	0.3281	NA	NA	NA	NA	NA	163.454	3.51521	4.13671	172.813	13.2529	13.5116	NA	NA	NA	13.7601	NA		163.454	3.51521	2.15058	4.13671	2.5336
UK056	UK056_139	NA	195	4260	3.92	0.0779324	NA	NA	38.9257	2.38893	0.0494	10.1464	NA	NA	0.174982	10.4238	0.02569	2.38893	-0.023932	NA	NA	NA	NA	NA	163.517	3.85718	4.43137	163.733	15.7635	15.9611	NA	NA	NA	97.8866	NA		163.517	3.85718	2.35889	4.43137	2.70982
UK056	UK056_85	NA	571	12130	26.3	0.0732591	NA	NA	38.9105	2.21517	0.0475	8.06936	NA	NA	0.168317	8.36789	0.0257	2.21517	0.12024	NA	NA	NA	NA	NA	163.58	3.57799	4.19105	157.957	12.2415	12.4788	NA	NA	NA	36.07	NA		163.58	3.57799	2.18731	4.19105	2.5665
UK056	UK056_203	NA	222	5090	7.87	0.0787788	NA	NA	38.9105	2.34211	0.0464	10.2467	NA	NA	0.164419	10.5109	0.0257	2.34211	-0.0017742	NA	NA	NA	NA	NA	163.58	3.78302	4.36739	154.564	15.0711	15.257	NA	NA	NA	24.4191	NA		163.58	3.78302	2.31264	4.36739	2.67879
UK056	UK056_166	NA	1575	32000	23.03	0.0766134	NA	NA	38.8802	2.19078	0.0524	6.82473	NA	NA	0.185825	7.16774	0.02572	2.19078	0.19631	NA	NA	NA	NA	NA	163.705	3.54128	4.16062	173.06	11.4055	11.7058	NA	NA	NA	9.79795	NA		163.705	3.54128	2.1632	4.16062	2.5364
UK056	UK056_13	NA	1010	22010	31.1	0.0721076	NA	NA	38.85	2.27883	0.0485	7.35964	NA	NA	0.172128	7.70437	0.02574	2.27883	0.29632	NA	NA	NA	NA	NA	163.831	3.6864	4.28566	161.264	11.4885	11.7508	NA	NA	NA	63.9531	NA		163.831	3.6864	2.25012	4.28566	2.61627
UK056	UK056_136	NA	221	4580	5.42	0.0808955	NA	NA	38.85	2.31959	0.0512	10.1572	NA	NA	0.18171	10.4187	0.02574	2.31959	-0.077039	NA	NA	NA	NA	NA	163.831	3.75233	4.3425	169.531	16.2686	16.4727	NA	NA	NA	50.2857	NA		163.831	3.75233	2.29037	4.3425	2.64463
UK056	UK056_174	NA	348	7550	9.7	0.0788618	NA	NA	38.835	2.30542	0.0477	9.00655	NA	NA	0.169355	9.29693	0.02575	2.30542	-0.12882	NA	NA	NA	NA	NA	163.894	3.73082	4.32435	158.859	13.6725	13.8876	NA	NA	NA	49.0287	NA		163.894	3.73082	2.27636	4.32435	2.64633
UK056	UK056_61	NA	423	8180	11.97	0.0757595	NA	NA	38.8048	2.25361	0.0535	8.48135	NA	NA	0.190094	8.77565	0.02577	2.25361	0.10819	NA	NA	NA	NA	NA	164.02	3.64973	4.25543	176.71	14.234	14.4851	NA	NA	NA	7.77524	NA		164.02	3.64973	2.22518	4.25543	2.58713
UK056	UK056_264	NA	523	10910	16.8	0.0777778	NA	NA	38.8048	2.3263	0.0525	8.23918	NA	NA	0.186541	8.5613	0.02577	2.3263	0.2442	NA	NA	NA	NA	NA	164.02	3.76745	4.35682	173.674	13.6675	13.9207	NA	NA	NA	14.7237	NA		164.02	3.76745	2.29695	4.35682	2.65496
UK056	UK056_144	NA	291	5600	9.66	0.0705625	NA	NA	38.7297	2.27149	0.0549	8.97154	NA	NA	0.195447	9.25463	0.02582	2.27149	0.071582	NA	NA	NA	NA	NA	164.334	3.68565	4.2884	181.267	15.3646	15.6086	NA	NA	NA	3.05825	NA		164.334	3.68565	2.24278	4.2884	2.59931
UK056	UK056_140	NA	895	18820	34.5	0.0787671	NA	NA	38.7147	2.16928	0.0498	7.47728	NA	NA	0.17736	7.78559	0.02583	2.16928	-0.083922	NA	NA	NA	NA	NA	164.397	3.52114	4.14829	165.786	11.9093	12.1757	NA	NA	NA	82.6885	NA		164.397	3.52114	2.14185	4.14829	2.52124
UK056	UK056_246	NA	564	12640	9.75	0.0722222	NA	NA	38.6548	2.21905	0.0483	8.26639	NA	NA	0.172284	8.55906	0.02587	2.21905	0.054548	NA	NA	NA	NA	NA	164.648	3.60736	4.22345	161.399	12.7729	13.0097	NA	NA	NA	61.8883	NA		164.648	3.60736	2.19095	4.22345	2.56826
UK056	UK056_128	NA	438	9040	12.3	0.0777989	NA	NA	38.625	2.22417	0.0518	8.55151	NA	NA	0.184911	8.83602	0.02589	2.22417	0.063256	NA	NA	NA	NA	NA	164.774	3.61841	4.23375	172.278	14.002	14.2458	NA	NA	NA	29.3451	NA		164.774	3.61841	2.19599	4.23375	2.56381
UK056	UK056_96	NA	1552	31900	59.3	0.0733004	NA	NA	38.5951	2.18529	0.0498	6.89994	NA	NA	0.177909	7.23772	0.02591	2.18529	0.26765	NA	NA	NA	NA	NA	164.899	3.55783	4.18296	166.26	11.1003	11.3871	NA	NA	NA	79.9625	NA		164.899	3.55783	2.15757	4.18296	2.5363
UK056	UK056_243	NA	382	8230	5.01	0.0931227	NA	NA	38.4468	2.40674	0.0508	8.85229	NA	NA	0.182182	9.17363	0.02601	2.40674	0.20652	NA	NA	NA	NA	NA	165.528	3.93311	4.51052	169.936	14.3556	14.5875	NA	NA	NA	53.1982	NA		165.528	3.93311	2.3761	4.51052	2.72357
UK056	UK056_56	NA	848	16210	23	0.0730159	NA	NA	38.432	2.19356	0.0537	7.57813	NA	NA	0.192656	7.88922	0.02602	2.19356	-0.16719	NA	NA	NA	NA	NA	165.591	3.58608	4.21178	178.893	12.9406	13.2226	NA	NA	NA	5.85825	NA		165.591	3.58608	2.16563	4.21178	2.5224
UK056	UK056_39	NA	384	7380	9.42	0.0726852	NA	NA	38.3877	2.30804	0.0554	8.65544	NA	NA	0.198984	8.95788	0.02605	2.30804	0.151	NA	NA	NA	NA	NA	165.779	3.77747	4.37715	184.266	15.0964	15.3521	NA	NA	NA	1.45172	NA		165.779	3.77747	2.27862	4.37715	2.63335
UK056	UK056_217	NA	184	3660	5.25	0.0744681	NA	NA	38.3877	2.36626	0.0526	10.3041	NA	NA	0.188927	10.5723	0.02605	2.36626	0.26282	NA	NA	NA	NA	NA	165.779	3.87275	4.45964	175.714	17.06	17.2679	NA	NA	NA	22.999	NA		165.779	3.87275	2.33609	4.45964	2.69159
UK056	UK056_186	NA	1470	31080	21.6	0.0828856	NA	NA	38.3289	2.17602	0.0511	6.95675	NA	NA	0.183821	7.28913	0.02609	2.17602	0.13586	NA	NA	NA	NA	NA	166.03	3.56672	4.19837	171.344	11.493	11.7858	NA	NA	NA	35.9145	NA		166.03	3.56672	2.14823	4.19837	2.5244
UK056	UK056_62	NA	96	1802	1.76	0.0837696	NA	NA	38.3142	2.69769	0.0529	12.4992	NA	NA	0.19037	12.7871	0.0261	2.69769	-0.033644	NA	NA	NA	NA	NA	166.093	4.42345	4.94726	176.945	20.7671	20.9405	NA	NA	NA	31.229	NA		166.093	4.42345	2.66323	4.94726	2.96911
UK056	UK056_138	NA	664	14340	18.2	0.080531	NA	NA	38.3142	2.20239	0.0471	7.90527	NA	NA	0.169497	8.20633	0.0261	2.20239	-0.08945	NA	NA	NA	NA	NA	166.093	3.6113	4.23674	158.983	12.0771	12.3205	NA	NA	NA	26.9324	NA		166.093	3.6113	2.17426	4.23674	2.56205
UK056	UK056_8	NA	1104	23800	34	0.0721868	NA	NA	38.2848	2.18851	0.0477	7.21403	NA	NA	0.171788	7.53869	0.02612	2.18851	0.37174	NA	NA	NA	NA	NA	166.219	3.59122	4.2205	160.969	11.2224	11.4899	NA	NA	NA	31.3015	NA		166.219	3.59122	2.16054	4.2205	2.53763
UK056	UK056_75	NA	741	14820	29.2	0.0760417	NA	NA	38.2702	2.25581	0.0513	8.08642	NA	NA	0.184824	8.39517	0.02613	2.25581	-0.01159	NA	NA	NA	NA	NA	166.282	3.70303	4.31646	172.203	13.2981	13.5542	NA	NA	NA	39.351	NA		166.282	3.70303	2.22696	4.31646	2.58905
UK056	UK056_181	NA	383	8050	16.6	0.0809756	NA	NA	38.1825	2.25518	0.0513	8.90917	NA	NA	0.185248	9.19017	0.02619	2.25518	0.13205	NA	NA	NA	NA	NA	166.659	3.71028	4.32524	172.567	14.5857	14.8206	NA	NA	NA	41.8539	NA		166.659	3.71028	2.22628	4.32524	2.59244
UK056	UK056_187	NA	232	4950	7.66	0.0717901	NA	NA	38.1679	2.29256	0.0498	9.73393	NA	NA	0.1799	10.0003	0.0262	2.29256	0.04629	NA	NA	NA	NA	NA	166.721	3.77319	4.37974	167.975	15.4832	15.694	NA	NA	NA	87.3732	NA		166.721	3.77319	2.26317	4.37974	2.62606
UK056	UK056_94	NA	1306	25290	21	0.0763636	NA	NA	38.1534	2.1837	0.0514	7.03321	NA	NA	0.185751	7.36441	0.02621	2.1837	0.14974	NA	NA	NA	NA	NA	166.784	3.59537	4.22794	172.997	11.7145	12.007	NA	NA	NA	29.067	NA		166.784	3.59537	2.1557	4.22794	2.5305
UK056	UK056_178	NA	96	2100	2.9	0.0900621	NA	NA	38.1388	2.47868	0.0496	12.611	NA	NA	0.179315	12.8523	0.02622	2.47868	-0.04433	NA	NA	NA	NA	NA	166.847	4.08254	4.6497	167.471	19.845	20.009	NA	NA	NA	95.135	NA		166.847	4.08254	2.44688	4.6497	2.7863
UK056	UK056_43	NA	866	18300	23.1	0.0759868	NA	NA	38.0952	2.19221	0.0484	7.80918	NA	NA	0.175177	8.11105	0.02625	2.19221	-0.10137	NA	NA	NA	NA	NA	167.035	3.61474	4.24616	163.901	12.2772	12.5304	NA	NA	NA	63.3045	NA		167.035	3.61474	2.16405	4.24616	2.54694
UK056	UK056_193	NA	447	9900	18.2	0.077086	NA	NA	38.0807	2.24862	0.0494	8.32801	NA	NA	0.178864	8.62624	0.02626	2.24862	0.12798	NA	NA	NA	NA	NA	167.098	3.70913	4.32723	167.083	13.2903	13.5329	NA	NA	NA	99.8115	NA		167.098	3.70913	2.21973	4.32723	2.58964
UK056	UK056_155	NA	206	4210	6.57	0.0807125	NA	NA	38.0662	2.39333	0.0496	10.3667	NA	NA	0.179657	10.6394	0.02627	2.39333	-0.095224	NA	NA	NA	NA	NA	167.161	3.94929	4.53518	167.765	16.454	16.652	NA	NA	NA	94.4302	NA		167.161	3.94929	2.36257	4.53518	2.71234
UK056	UK056_25	NA	148	3160	2.52	0.0728324	NA	NA	37.9075	2.40712	0.0485	11.1727	NA	NA	0.176408	11.4291	0.02638	2.40712	-0.014807	NA	NA	NA	NA	NA	167.852	3.98825	4.57359	164.965	17.4038	17.5855	NA	NA	NA	74.6834	NA		167.852	3.98825	2.37605	4.57359	2.72726
UK056	UK056_52	NA	2046	40500	9.41	0.10032	NA	NA	37.9075	2.15992	0.0514	6.61355	NA	NA	0.186956	6.95731	0.02638	2.15992	0.20899	NA	NA	NA	NA	NA	167.852	3.57867	4.2212	174.028	11.1274	11.4382	NA	NA	NA	26.0751	NA		167.852	3.57867	2.13204	4.2212	2.51144
UK056	UK056_129	NA	159	3118	7.13	0.0784378	NA	NA	37.9075	2.49233	0.0544	10.8387	NA	NA	0.197868	11.1215	0.02638	2.49233	0.21306	NA	NA	NA	NA	NA	167.852	4.12943	4.69721	183.32	18.6556	18.8613	NA	NA	NA	9.20698	NA		167.852	4.12943	2.46016	4.69721	2.79813
UK056	UK056_10	NA	1629	33300	67.2	0.0711111	NA	NA	37.8931	2.17865	0.0519	6.81959	NA	NA	0.188846	7.15914	0.02639	2.17865	0.11591	NA	NA	NA	NA	NA	167.915	3.61105	4.24911	175.644	11.5476	11.8524	NA	NA	NA	18.7608	NA		167.915	3.61105	2.15052	4.24911	2.52364
UK056	UK056_277	NA	364	8630	10.18	0.0817671	NA	NA	37.8788	2.215	0.0457	9.32063	NA	NA	0.166349	9.58021	0.0264	2.215	-0.05408	NA	NA	NA	NA	NA	167.978	3.67265	4.30201	156.246	13.8747	14.0804	NA	NA	NA	10.4932	NA		167.978	3.67265	2.18639	4.30201	2.57506
UK056	UK056_247	NA	635	13610	22.5	0.0785615	NA	NA	37.8358	2.17846	0.0514	8.15015	NA	NA	0.18731	8.43627	0.02643	2.17846	-0.039368	NA	NA	NA	NA	NA	168.166	3.61607	4.25512	174.332	13.5146	13.7724	NA	NA	NA	38.3938	NA		168.166	3.61607	2.15029	4.25512	2.5234
UK056	UK056_66	NA	287	5840	7.3	0.0713587	NA	NA	37.8215	2.28947	0.0521	9.2727	NA	NA	0.189933	9.55116	0.02644	2.28947	0.057029	NA	NA	NA	NA	NA	168.229	3.80172	4.4144	176.572	15.481	15.7119	NA	NA	NA	29.052	NA		168.229	3.80172	2.25985	4.4144	2.6183
UK056	UK056_108	NA	942	20300	39.2	0.0761165	NA	NA	37.7358	2.16299	0.0489	7.443	NA	NA	0.178672	7.75092	0.0265	2.16299	-0.17674	NA	NA	NA	NA	NA	168.606	3.59964	4.24423	166.917	11.9307	12.1999	NA	NA	NA	79.5755	NA		168.606	3.59964	2.13495	4.24423	2.5203
UK056	UK056_160	NA	573	11810	17.7	0.0837275	NA	NA	37.7358	2.20451	0.0497	8.18275	NA	NA	0.181595	8.4745	0.0265	2.20451	0.18601	NA	NA	NA	NA	NA	168.606	3.66875	4.303	169.432	13.2252	13.4753	NA	NA	NA	89.9265	NA		168.606	3.66875	2.17593	4.303	2.55178
UK056	UK056_106	NA	1057	21190	38.4	0.0771084	NA	NA	37.7216	2.22967	0.0508	7.7993	NA	NA	0.185684	8.11175	0.02651	2.22967	0.053966	NA	NA	NA	NA	NA	168.668	3.71198	4.34035	172.94	12.8995	13.1655	NA	NA	NA	51.9178	NA		168.668	3.71198	2.20075	4.34035	2.56917
UK056	UK056_293	NA	200	4190	4.19	0.0710169	NA	NA	37.679	2.46193	0.051	10.4055	NA	NA	0.186626	10.6928	0.02654	2.46193	0.061154	NA	NA	NA	NA	NA	168.857	4.10317	4.68049	173.746	17.0773	17.2808	NA	NA	NA	57.3106	NA		168.857	4.10317	2.42997	4.68049	2.76854
UK056	UK056_207	NA	616	13200	18.3	0.0806167	NA	NA	37.6648	2.18618	0.048	8.05369	NA	NA	0.175714	8.34513	0.02655	2.18618	0.16192	NA	NA	NA	NA	NA	168.92	3.64492	4.28487	164.366	12.6646	12.9115	NA	NA	NA	46.8808	NA		168.92	3.64492	2.15778	4.28487	2.53917
UK056	UK056_253	NA	126	2441	3.01	0.0862464	NA	NA	37.6223	2.53227	0.0568	11.2335	NA	NA	0.208164	11.5154	0.02658	2.53227	0.085486	NA	NA	NA	NA	NA	169.108	4.22659	4.79061	192.01	20.1486	20.3558	NA	NA	NA	2.50684	NA		169.108	4.22659	2.49934	4.79061	2.82344
UK056	UK056_159	NA	154	3240	4.38	0.0722772	NA	NA	37.6081	2.37166	0.0497	10.5972	NA	NA	0.182212	10.8594	0.02659	2.37166	0.13668	NA	NA	NA	NA	NA	169.171	3.95998	4.55753	169.962	16.9963	17.1928	NA	NA	NA	92.5514	NA		169.171	3.95998	2.34082	4.55753	2.69375
UK056	UK056_281	NA	71	1591	1.83	0.0770851	NA	NA	37.594	2.69897	0.0449	13.4007	NA	NA	0.164676	13.6698	0.0266	2.69897	0.14204	NA	NA	NA	NA	NA	169.234	4.50813	5.04148	154.788	19.6277	19.7712	NA	NA	NA	13.58	NA		169.234	4.50813	2.66385	5.04148	2.98443
UK056	UK056_29	NA	168	3490	4.36	0.0782765	NA	NA	37.5657	2.39428	0.0493	10.6814	NA	NA	0.180949	10.9464	0.02662	2.39428	0.0028933	NA	NA	NA	NA	NA	169.359	4.00213	4.59541	168.877	17.0321	17.2258	NA	NA	NA	95.5983	NA		169.359	4.00213	2.3631	4.59541	2.71381
UK056	UK056_194	NA	341	7510	8.71	0.0773535	NA	NA	37.5516	2.29351	0.0494	8.93019	NA	NA	0.181384	9.22	0.02663	2.29351	0.052423	NA	NA	NA	NA	NA	169.422	3.83509	4.45112	169.251	14.3747	14.6046	NA	NA	NA	98.1402	NA		169.422	3.83509	2.26363	4.45112	2.62738
UK056	UK056_90	NA	114	2480	3.57	0.0813212	NA	NA	37.4953	2.52054	0.0451	11.4856	NA	NA	0.165844	11.7589	0.02667	2.52054	-0.076839	NA	NA	NA	NA	NA	169.673	4.22089	4.7891	155.806	16.9863	17.1538	NA	NA	NA	11.7329	NA		169.673	4.22089	2.48766	4.7891	2.83986
UK056	UK056_242	NA	693	15440	17.8	0.0828292	NA	NA	37.4813	2.18133	0.0484	7.84238	NA	NA	0.178046	8.14009	0.02668	2.18133	0.28184	NA	NA	NA	NA	NA	169.736	3.65419	4.29841	166.378	12.4926	12.7484	NA	NA	NA	57.4625	NA		169.736	3.65419	2.15286	4.29841	2.53259
UK056	UK056_153	NA	71	1849	2.77	0.0819527	NA	NA	37.4672	2.5476	0.0425	14.0347	NA	NA	0.156401	14.264	0.02669	2.5476	-0.002925	NA	NA	NA	NA	NA	169.799	4.26932	4.83261	147.548	19.591	19.7226	NA	NA	NA	2.50512	NA		169.799	4.26932	2.51434	4.83261	2.86383
UK056	UK056_285	NA	52	1221	1.63	0.0847634	NA	NA	37.4532	3.03142	0.054	14.3654	NA	NA	0.198795	14.6818	0.0267	3.03142	-0.10487	NA	NA	NA	NA	NA	169.862	5.08197	5.56391	184.106	24.7261	24.8829	NA	NA	NA	27.1621	NA		169.862	5.08197	2.99183	5.56391	3.25971
UK056	UK056_120	NA	208	4660	7.1	0.0761803	NA	NA	37.4111	2.3257	0.0473	10.1522	NA	NA	0.174326	10.4151	0.02673	2.3257	-0.058462	NA	NA	NA	NA	NA	170.05	3.90314	4.51403	163.166	15.7001	15.8973	NA	NA	NA	39.9718	NA		170.05	3.90314	2.29529	4.51403	2.66213
UK056	UK056_41	NA	144	3170	3.72	0.0932331	NA	NA	37.2995	2.40625	0.0459	11.3025	NA	NA	0.169672	11.5558	0.02681	2.40625	-0.052251	NA	NA	NA	NA	NA	170.552	4.05011	4.64493	159.134	17.0222	17.1961	NA	NA	NA	19.4814	NA		170.552	4.05011	2.3747	4.64493	2.73531
UK056	UK056_255	NA	1153	25700	38	0.0840708	NA	NA	37.2717	2.16182	0.0494	7.28637	NA	NA	0.182746	7.60031	0.02683	2.16182	0.084544	NA	NA	NA	NA	NA	170.678	3.64133	4.29404	170.421	11.9244	12.2041	NA	NA	NA	96.6351	NA		170.678	3.64133	2.13345	4.29404	2.51612
UK056	UK056_287	NA	126	2660	2.65	0.0748165	NA	NA	37.2717	2.54347	0.051	13.9963	NA	NA	0.188665	14.2255	0.02683	2.54347	-0.026143	NA	NA	NA	NA	NA	170.678	4.28418	4.85115	175.49	22.93	23.0848	NA	NA	NA	68.1945	NA		170.678	4.28418	2.5101	4.85115	2.83926
UK056	UK056_77	NA	581	12730	18.1	0.078355	NA	NA	37.2024	2.24269	0.0472	8.12522	NA	NA	0.174933	8.42905	0.02688	2.24269	-0.022138	NA	NA	NA	NA	NA	170.992	3.7844	4.41814	163.691	12.7436	12.9871	NA	NA	NA	27.3484	NA		170.992	3.7844	2.21321	4.41814	2.59345
UK056	UK056_150	NA	79	1584	2.38	0.085	NA	NA	37.1747	2.79277	0.0526	12.666	NA	NA	0.195092	12.9703	0.0269	2.79277	0.14496	NA	NA	NA	NA	NA	171.117	4.71604	5.23897	180.965	21.5022	21.6767	NA	NA	NA	35.8123	NA		171.117	4.71604	2.75603	5.23897	3.05881
UK056	UK056_199	NA	54	1368	1.48	0.0830062	NA	NA	37.1747	2.9038	0.044	14.4851	NA	NA	0.163195	14.7733	0.0269	2.9038	0.17439	NA	NA	NA	NA	NA	171.117	4.90354	5.40838	153.496	21.0486	21.1805	NA	NA	NA	8.68911	NA		171.117	4.90354	2.8656	5.40838	3.16556
UK056	UK056_231	NA	209	4550	4.35	0.0841393	NA	NA	37.1747	2.34419	0.0486	10.1696	NA	NA	0.180256	10.4363	0.0269	2.34419	-0.028666	NA	NA	NA	NA	NA	171.117	3.95855	4.56902	168.281	16.1855	16.3879	NA	NA	NA	73.4867	NA		171.117	3.95855	2.31336	4.56902	2.67288
UK056	UK056_210	NA	119	2560	2.14	0.0775362	NA	NA	37.1333	2.49561	0.0491	11.8816	NA	NA	0.182314	12.1409	0.02693	2.49561	-0.30658	NA	NA	NA	NA	NA	171.306	4.21882	4.79746	170.049	19.0116	19.1876	NA	NA	NA	90.3341	NA		171.306	4.21882	2.46275	4.79746	2.80256
UK056	UK056_112	NA	119	2628	3.24	0.0796069	NA	NA	37.0096	2.45893	0.0461	11.4716	NA	NA	0.171746	11.7321	0.02702	2.45893	0.069153	NA	NA	NA	NA	NA	171.87	4.17033	4.75844	160.933	17.4624	17.6355	NA	NA	NA	21.3443	NA		171.87	4.17033	2.42644	4.75844	2.77575
UK056	UK056_227	NA	78	1490	1.57	0.0871738	NA	NA	36.9822	2.61265	0.059	12.8985	NA	NA	0.219968	13.1605	0.02704	2.61265	0.024681	NA	NA	NA	NA	NA	171.996	4.43423	4.99211	201.883	24.0987	24.2888	NA	NA	NA	1.56522	NA		171.996	4.43423	2.5781	4.99211	2.88874
UK056	UK056_6	NA	95	1958	2.3	0.0871873	NA	NA	36.9686	2.59309	0.0517	12.087	NA	NA	0.192823	12.3621	0.02705	2.59309	0.33701	NA	NA	NA	NA	NA	172.059	4.40262	4.96443	179.035	20.2937	20.475	NA	NA	NA	47.0372	NA		172.059	4.40262	2.55879	4.96443	2.88873
UK056	UK056_80	NA	433	9650	21	0.076087	NA	NA	36.9549	2.26372	0.0478	10.4138	NA	NA	0.178343	10.657	0.02706	2.26372	0.19006	NA	NA	NA	NA	NA	172.122	3.8448	4.47759	166.634	16.379	16.5756	NA	NA	NA	49.4189	NA		172.122	3.8448	2.23377	4.47759	2.60234
UK056	UK056_145	NA	123	2798	4.86	0.0747692	NA	NA	36.9413	2.49198	0.0441	11.4978	NA	NA	0.164599	11.7647	0.02707	2.49198	0.10485	NA	NA	NA	NA	NA	172.184	4.234	4.81631	154.721	16.8851	17.0515	NA	NA	NA	3.80247	NA		172.184	4.234	2.45899	4.81631	2.80788
UK056	UK056_74	NA	91	1720	1.5	0.07109	NA	NA	36.7918	2.57951	0.0525	12.2695	NA	NA	0.196748	12.5377	0.02718	2.57951	-0.066172	NA	NA	NA	NA	NA	172.875	4.40005	4.96713	182.371	20.9324	21.1141	NA	NA	NA	38.2791	NA		172.875	4.40005	2.54523	4.96713	2.86481
UK056	UK056_122	NA	158	3090	4.88	0.0813333	NA	NA	36.6703	2.36697	0.0519	10.8641	NA	NA	0.195143	11.119	0.02727	2.36697	0.31865	NA	NA	NA	NA	NA	173.439	4.05052	4.664	181.008	18.4364	18.6398	NA	NA	NA	39.0728	NA		173.439	4.05052	2.33541	4.664	2.69197
UK056	UK056_104	NA	82	1735	1.65	0.088047	NA	NA	36.63	2.8839	0.0503	12.8047	NA	NA	0.189335	13.1255	0.0273	2.8839	-0.077051	NA	NA	NA	NA	NA	173.628	4.94042	5.45577	176.062	21.2195	21.3877	NA	NA	NA	82.6217	NA		173.628	4.94042	2.84541	5.45577	3.13931
UK056	UK056_201	NA	145	2820	6.09	0.0827446	NA	NA	36.5631	2.36557	0.0559	10.9274	NA	NA	0.2108	11.1806	0.02735	2.36557	0.29419	NA	NA	NA	NA	NA	173.941	4.05969	4.67524	194.224	19.7673	19.9829	NA	NA	NA	3.4335	NA		173.941	4.05969	2.33394	4.67524	2.69426
UK056	UK056_205	NA	153	3150	4.79	0.0867754	NA	NA	36.4431	2.36402	0.0508	11.0709	NA	NA	0.192198	11.3205	0.02744	2.36402	0.0068274	NA	NA	NA	NA	NA	174.506	4.07002	4.68789	178.503	18.5329	18.7301	NA	NA	NA	67.3623	NA		174.506	4.07002	2.33231	4.68789	2.68364
UK056	UK056_103	NA	365	8230	18.9	0.0784232	NA	NA	36.3504	2.27065	0.0458	8.99007	NA	NA	0.173723	9.2724	0.02751	2.27065	0.069987	NA	NA	NA	NA	NA	174.945	3.91898	4.56033	162.645	13.9361	14.1565	NA	NA	NA	8.17407	NA		174.945	3.91898	2.24012	4.56033	2.61744
UK056	UK056_114	NA	99	2153	3.32	0.0840506	NA	NA	36.2976	2.55905	0.048	12.5777	NA	NA	0.182333	12.8354	0.02755	2.55905	-0.029342	NA	NA	NA	NA	NA	175.196	4.42298	5.00163	170.066	20.1012	20.2678	NA	NA	NA	61.9401	NA		175.196	4.42298	2.52458	5.00163	2.85923
UK056	UK056_34	NA	534	10880	15.2	0.0779487	NA	NA	36.245	2.19769	0.0523	8.28725	NA	NA	0.198955	8.5737	0.02759	2.19769	0.10036	NA	NA	NA	NA	NA	175.447	3.80378	4.46517	184.242	14.4471	14.714	NA	NA	NA	22.9041	NA		175.447	3.80378	2.16805	4.46517	2.53974
UK056	UK056_102	NA	117	2060	3.91	0.0868889	NA	NA	36.1795	2.42865	0.058	12.1062	NA	NA	0.221038	12.3474	0.02764	2.42865	0.074116	NA	NA	NA	NA	NA	175.761	4.21095	4.81875	202.773	22.6994	22.9026	NA	NA	NA	1.91717	NA		175.761	4.21095	2.39584	4.81875	2.7335
UK056	UK056_11	NA	95	1944	1.8	0.0694981	NA	NA	35.9712	2.65459	0.0522	11.9422	NA	NA	0.200086	12.2337	0.0278	2.65459	0.088106	NA	NA	NA	NA	NA	176.765	4.62863	5.19369	185.199	20.7135	20.9024	NA	NA	NA	41.9624	NA		176.765	4.62863	2.61853	5.19369	2.93408
UK056	UK056_14	NA	116	2464	3.6	0.0757895	NA	NA	35.9066	2.47264	0.0499	11.2094	NA	NA	0.191614	11.4788	0.02785	2.47264	0.11598	NA	NA	NA	NA	NA	177.078	4.31892	4.92167	178.005	18.7443	18.9383	NA	NA	NA	92.1197	NA		177.078	4.31892	2.43899	4.92167	2.77899
UK056	UK056_127	NA	86	1812	2.21	0.0863956	NA	NA	35.8166	2.52191	0.0469	12.9625	NA	NA	0.180547	13.2055	0.02792	2.52191	-0.11493	NA	NA	NA	NA	NA	177.517	4.41574	5.00956	168.531	20.5093	20.6699	NA	NA	NA	40.065	NA		177.517	4.41574	2.4875	5.00956	2.8314
UK056	UK056_176	NA	73	1760	2.86	0.0869301	NA	NA	35.5999	2.52604	0.046	13.8905	NA	NA	0.17816	14.1183	0.02809	2.52604	-0.032194	NA	NA	NA	NA	NA	178.583	4.44916	5.04565	166.476	21.6813	21.8299	NA	NA	NA	27.4302	NA		178.583	4.44916	2.49137	5.04565	2.83438
UK056	UK056_3	NA	618	12510	20.4	0.0790698	NA	NA	35.3482	2.21598	0.0503	8.06715	NA	NA	0.196201	8.36597	0.02829	2.21598	-0.25618	NA	NA	NA	NA	NA	179.837	3.93007	4.60301	181.907	13.9339	14.2041	NA	NA	NA	78.8437	NA		179.837	3.93007	2.18535	4.60301	2.5559
UK056	UK056_134	NA	101	2170	2.61	0.0855738	NA	NA	34.6021	2.712	0.0486	12.0315	NA	NA	0.193658	12.3334	0.0289	2.712	0.23742	NA	NA	NA	NA	NA	183.66	4.91057	5.48626	179.746	20.3201	20.5024	NA	NA	NA	69.1052	NA		183.66	4.91057	2.67373	5.48626	2.98727
UK056	UK056_283	NA	393	8380	7.96	0.0807302	NA	NA	34.3053	2.25947	0.0519	8.90295	NA	NA	0.208597	9.18519	0.02915	2.25947	-0.25653	NA	NA	NA	NA	NA	185.226	4.12557	4.80695	192.374	16.0983	16.3578	NA	NA	NA	41.826	NA		185.226	4.12557	2.22732	4.80695	2.58429
UK056	UK056_224	NA	278	5600	4.58	0.0890185	NA	NA	33.8868	2.29508	0.0535	9.25687	NA	NA	0.217683	9.53714	0.02951	2.29508	-0.18663	NA	NA	NA	NA	NA	187.481	4.24087	4.92121	199.979	17.3133	17.5723	NA	NA	NA	18.0621	NA		187.481	4.24087	2.26203	4.92121	2.60911
UK056	UK056_195	NA	159	3280	2.33	0.0862963	NA	NA	33.5345	2.3402	0.0501	10.0636	NA	NA	0.20599	10.3321	0.02982	2.3402	0.025533	NA	NA	NA	NA	NA	189.422	4.36835	5.04416	190.182	17.9211	18.1498	NA	NA	NA	93.3898	NA		189.422	4.36835	2.30615	5.04416	2.66239
UK056	UK056_162	NA	195	3708	4.44	0.0919255	NA	NA	33.4672	2.31443	0.0567	10.4184	NA	NA	0.233596	10.6724	0.02988	2.31443	-0.029934	NA	NA	NA	NA	NA	189.797	4.32869	5.01234	213.163	20.5231	20.7686	NA	NA	NA	2.83826	NA		189.797	4.32869	2.28069	5.01234	2.6258
UK056	UK056_105	NA	312	6420	7.4	0.081768	NA	NA	33.456	2.21431	0.0499	9.15314	NA	NA	0.20565	9.41717	0.02989	2.21431	0.18139	NA	NA	NA	NA	NA	189.86	4.14278	4.85312	189.895	16.3115	16.5617	NA	NA	NA	99.647	NA		189.86	4.14278	2.18202	4.85312	2.55615
UK056	UK056_262	NA	415	9530	13.3	0.1	NA	NA	33.4448	2.21871	0.0485	8.69459	NA	NA	0.199947	8.97321	0.0299	2.21871	0.023751	NA	NA	NA	NA	NA	189.922	4.15236	4.86173	185.081	15.1832	15.4395	NA	NA	NA	53.5117	NA		189.922	4.15236	2.18635	4.86173	2.56409
UK056	UK056_99	NA	313	5820	7.62	0.0849498	NA	NA	33.3111	2.32484	0.0529	9.12405	NA	NA	0.218961	9.41558	0.03002	2.32484	-0.06801	NA	NA	NA	NA	NA	190.673	4.36794	5.05204	201.045	17.175	17.4385	NA	NA	NA	25.1378	NA		190.673	4.36794	2.2908	5.05204	2.63899
UK056	UK056_251	NA	548	12180	8.88	0.0864654	NA	NA	33.036	2.22524	0.0487	8.31842	NA	NA	0.203256	8.61091	0.03027	2.22524	0.053793	NA	NA	NA	NA	NA	192.238	4.2146	4.93069	187.877	14.7705	15.0411	NA	NA	NA	56.3839	NA		192.238	4.2146	2.19239	4.93069	2.56858
UK056	UK056_188	NA	376	8150	6.62	0.094302	NA	NA	33.0142	2.27522	0.0491	8.84574	NA	NA	0.205061	9.13366	0.03029	2.27522	0.2855	NA	NA	NA	NA	NA	192.363	4.31203	5.01506	189.399	15.7828	16.04	NA	NA	NA	69.4712	NA		192.363	4.31203	2.24161	5.01506	2.60695
UK056	UK056_244	NA	927	20070	10.04	0.102764	NA	NA	33.0033	2.20325	0.0511	7.48129	NA	NA	0.213484	7.79897	0.0303	2.20325	0.13473	NA	NA	NA	NA	NA	192.426	4.17696	4.89984	196.472	13.9324	14.2429	NA	NA	NA	56.3793	NA		192.426	4.17696	2.17069	4.89984	2.54375
UK056	UK056_271	NA	578	11820	12.4	0.096124	NA	NA	33.0033	2.23916	0.054	8.08716	NA	NA	0.225599	8.39142	0.0303	2.23916	-0.087218	NA	NA	NA	NA	NA	192.426	4.24504	4.958	206.559	15.6852	15.9876	NA	NA	NA	9.04904	NA		192.426	4.24504	2.20607	4.958	2.56056
UK056	UK056_230	NA	220	5200	6.81	0.0796491	NA	NA	32.9598	2.32672	0.0472	9.72914	NA	NA	0.197451	10.0035	0.03034	2.32672	0.17165	NA	NA	NA	NA	NA	192.676	4.4167	5.1074	182.967	16.7503	16.9782	NA	NA	NA	23.9168	NA		192.676	4.4167	2.29229	5.1074	2.65419
UK056	UK056_292	NA	291	6010	5.49	0.0953125	NA	NA	32.9381	2.35802	0.0534	9.25189	NA	NA	0.223534	9.54765	0.03036	2.35802	0.10097	NA	NA	NA	NA	NA	192.801	4.47898	5.16217	204.847	17.7133	17.9777	NA	NA	NA	17.8889	NA		192.801	4.47898	2.32311	5.16217	2.67128
UK056	UK056_1	NA	1287	25990	38.2	0.0797495	NA	NA	32.6691	2.17534	0.0528	7.05547	NA	NA	0.222843	7.38321	0.03061	2.17534	-0.013251	NA	NA	NA	NA	NA	194.365	4.165	4.90302	204.273	13.6625	14.0018	NA	NA	NA	16.8587	NA		194.365	4.165	2.14287	4.90302	2.51144
UK056	UK056_46	NA	352	6900	5.83	0.087145	NA	NA	32.6584	2.32303	0.0526	8.94753	NA	NA	0.222071	9.24417	0.03062	2.32303	0.070665	NA	NA	NA	NA	NA	194.427	4.44918	5.14702	203.632	17.0583	17.3297	NA	NA	NA	28.9824	NA		194.427	4.44918	2.28835	5.14702	2.64135
UK056	UK056_88	NA	299	5760	6.76	0.111002	NA	NA	32.5839	2.34674	0.0515	9.54207	NA	NA	0.217924	9.82641	0.03069	2.34674	0.18489	NA	NA	NA	NA	NA	194.865	4.50457	5.19783	200.181	17.8548	18.1065	NA	NA	NA	54.6537	NA		194.865	4.50457	2.31163	5.19783	2.66615
UK056	UK056_7	NA	339	6060	7.62	0.085618	NA	NA	32.5733	2.2986	0.0554	9.18452	NA	NA	0.234504	9.46779	0.0307	2.2986	-0.18892	NA	NA	NA	NA	NA	194.928	4.41355	5.11957	213.91	18.2634	18.5406	NA	NA	NA	5.43692	NA		194.928	4.41355	2.2642	5.11957	2.60381
UK056	UK056_47	NA	287	5970	5.6	0.0801144	NA	NA	32.5415	2.28155	0.0511	9.47095	NA	NA	0.216513	9.74189	0.03073	2.28155	-0.078913	NA	NA	NA	NA	NA	195.115	4.38497	5.09621	199.004	17.607	17.8595	NA	NA	NA	67.4326	NA		195.115	4.38497	2.24737	5.09621	2.60805
UK056	UK056_152	NA	1070	20200	26.2	0.0888136	NA	NA	32.5203	2.24522	0.0546	7.44031	NA	NA	0.231494	7.77169	0.03075	2.24522	-0.19866	NA	NA	NA	NA	NA	195.241	4.31786	5.03943	211.431	14.8349	15.1678	NA	NA	NA	4.76905	NA		195.241	4.31786	2.21156	5.03943	2.55629
UK056	UK056_30	NA	482	9540	7.6	0.07343	NA	NA	32.4675	2.23526	0.0538	8.47782	NA	NA	0.228473	8.76754	0.0308	2.23526	-0.10806	NA	NA	NA	NA	NA	195.553	4.30548	5.03094	208.937	16.5583	16.851	NA	NA	NA	12.935	NA		195.553	4.30548	2.20169	5.03094	2.55796
UK056	UK056_141	NA	445	8580	13.53	0.0880286	NA	NA	32.4465	2.2259	0.0532	8.70803	NA	NA	0.226071	8.98801	0.03082	2.2259	-0.16465	NA	NA	NA	NA	NA	195.678	4.29016	5.01869	206.95	16.8292	17.1124	NA	NA	NA	21.3441	NA		195.678	4.29016	2.19246	5.01869	2.55122
UK056	UK056_163	NA	409	8750	8.28	0.0960557	NA	NA	32.4465	2.2351	0.048	8.88471	NA	NA	0.203974	9.16154	0.03082	2.2351	-0.26505	NA	NA	NA	NA	NA	195.678	4.3079	5.03386	188.483	15.7613	16.0166	NA	NA	NA	40.7083	NA		195.678	4.3079	2.20152	5.03386	2.58404
UK056	UK056_27	NA	359	7330	9	0.0932642	NA	NA	32.3939	2.26945	0.0518	8.81041	NA	NA	0.220479	9.09801	0.03087	2.26945	-0.1329	NA	NA	NA	NA	NA	195.991	4.38098	5.09864	202.309	16.6899	16.964	NA	NA	NA	47.9134	NA		195.991	4.38098	2.2353	5.09864	2.59389
UK056	UK056_16	NA	670	13040	11.52	0.0729576	NA	NA	32.3729	2.27989	0.0533	9.78723	NA	NA	0.227011	10.0493	0.03089	2.27989	-0.13848	NA	NA	NA	NA	NA	196.116	4.40391	5.11919	207.728	18.8805	19.135	NA	NA	NA	24.7157	NA		196.116	4.40391	2.24556	5.11919	2.59849
UK056	UK056_221	NA	280	6200	3.75	0.0910194	NA	NA	32.352	2.30187	0.0493	9.02016	NA	NA	0.21011	9.30923	0.03091	2.30187	-0.18881	NA	NA	NA	NA	NA	196.241	4.44916	5.15899	193.645	16.4136	16.6712	NA	NA	NA	77.0264	NA		196.241	4.44916	2.26719	5.15899	2.63261
UK056	UK056_32	NA	323	6130	11	0.0873016	NA	NA	32.2269	2.29486	0.0551	8.99195	NA	NA	0.235741	9.28017	0.03103	2.29486	0.0046686	NA	NA	NA	NA	NA	196.991	4.45231	5.1667	214.927	17.9779	18.2618	NA	NA	NA	5.43694	NA		196.991	4.45231	2.26015	5.1667	2.60962
UK056	UK056_165	NA	424	8380	9.61	0.0965829	NA	NA	32.2269	2.28932	0.0543	8.90223	NA	NA	0.232318	9.19188	0.03103	2.28932	0.093331	NA	NA	NA	NA	NA	196.991	4.44155	5.15743	212.11	17.597	17.8802	NA	NA	NA	9.04981	NA		196.991	4.44155	2.25469	5.15743	2.61041
UK056	UK056_263	NA	227	4750	3.78	0.0984375	NA	NA	32.2061	2.32347	0.0536	9.79669	NA	NA	0.229471	10.0685	0.03105	2.32347	0.085879	NA	NA	NA	NA	NA	197.117	4.51063	5.21786	209.762	19.0833	19.3396	NA	NA	NA	19.0935	NA		197.117	4.51063	2.28831	5.21786	2.6413
UK056	UK056_119	NA	419	8830	7.7	0.0906949	NA	NA	32.1854	2.20704	0.0517	8.46706	NA	NA	0.221479	8.74998	0.03107	2.20704	0.2091	NA	NA	NA	NA	NA	197.242	4.28728	5.02689	203.14	16.1109	16.3968	NA	NA	NA	45.597	NA		197.242	4.28728	2.17362	5.02689	2.54743
UK056	UK056_137	NA	215	4910	3.62	0.0898263	NA	NA	31.9183	2.29156	0.0474	9.8773	NA	NA	0.204758	10.1396	0.03133	2.29156	-0.19552	NA	NA	NA	NA	NA	198.867	4.48758	5.20956	189.144	17.4999	17.7317	NA	NA	NA	30.1537	NA		198.867	4.48758	2.25658	5.20956	2.63252
UK056	UK056_211	NA	625	13080	19.7	0.0958637	NA	NA	31.8979	2.21793	0.0511	7.95022	NA	NA	0.220882	8.2538	0.03135	2.21793	0.23037	NA	NA	NA	NA	NA	198.992	4.34608	5.08903	202.643	15.1636	15.4657	NA	NA	NA	62.1824	NA		198.992	4.34608	2.18405	5.08903	2.55662
UK056	UK056_116	NA	515	11360	14.5	0.0989761	NA	NA	31.8674	2.19737	0.0464	8.29117	NA	NA	0.200758	8.57741	0.03138	2.19737	-0.03187	NA	NA	NA	NA	NA	199.179	4.30978	5.05935	185.767	14.5624	14.8312	NA	NA	NA	7.82493	NA		199.179	4.30978	2.16377	5.05935	2.55542
UK056	UK056_48	NA	596	11980	11.47	0.0880276	NA	NA	31.7763	2.24897	0.051	7.88827	NA	NA	0.221293	8.2026	0.03147	2.24897	0.20454	NA	NA	NA	NA	NA	199.742	4.42326	5.16015	202.986	15.0925	15.3969	NA	NA	NA	66.2327	NA		199.742	4.42326	2.21449	5.16015	2.58229
UK056	UK056_133	NA	509	10390	11.31	0.0947236	NA	NA	31.5956	2.22462	0.0518	8.55417	NA	NA	0.22605	8.83871	0.03165	2.22462	0.052832	NA	NA	NA	NA	NA	200.867	4.39961	5.14753	206.933	16.5483	16.8362	NA	NA	NA	47.3908	NA		200.867	4.39961	2.19031	5.14753	2.5585
UK056	UK056_44	NA	780	16450	31.8	0.0908571	NA	NA	31.3972	2.18064	0.0495	7.77682	NA	NA	0.217378	8.07677	0.03185	2.18064	-0.086608	NA	NA	NA	NA	NA	202.116	4.33906	5.10447	199.725	14.645	14.9495	NA	NA	NA	75.9405	NA		202.116	4.33906	2.14681	5.10447	2.5285
UK056	UK056_269	NA	174	3820	3.34	0.0905149	NA	NA	31.1042	2.4419	0.0484	10.606	NA	NA	0.21455	10.8835	0.03215	2.4419	0.15907	NA	NA	NA	NA	NA	203.99	4.90325	5.6038	197.363	19.5238	19.7485	NA	NA	NA	49.2166	NA		203.99	4.90325	2.40367	5.6038	2.74923
UK056	UK056_23	NA	1740	36300	50.7	0.0866667	NA	NA	31.0945	2.1794	0.0499	6.82741	NA	NA	0.221268	7.16682	0.03216	2.1794	0.17077	NA	NA	NA	NA	NA	204.053	4.37747	5.15048	202.964	13.1852	13.5325	NA	NA	NA	86.8575	NA		204.053	4.37747	2.14527	5.15048	2.52482
UK056	UK056_248	NA	466	10810	11.4	0.095	NA	NA	30.8261	2.26499	0.0473	8.74884	NA	NA	0.211565	9.03728	0.03244	2.26499	-0.10806	NA	NA	NA	NA	NA	205.801	4.58776	5.34205	194.865	16.0251	16.2918	NA	NA	NA	19.9879	NA		205.801	4.58776	2.22922	5.34205	2.60956
UK056	UK056_270	NA	329	7210	6.22	0.108362	NA	NA	30.8166	2.28	0.05	9.05946	NA	NA	0.22371	9.34196	0.03245	2.28	0.12832	NA	NA	NA	NA	NA	205.864	4.61953	5.36977	204.993	17.3427	17.613	NA	NA	NA	92.0086	NA		205.864	4.61953	2.24398	5.36977	2.60882
UK056	UK056_286	NA	110	2420	1.86	0.0916256	NA	NA	30.6748	2.5957	0.0458	12.1056	NA	NA	0.205866	12.3808	0.0326	2.5957	0.095958	NA	NA	NA	NA	NA	206.8	5.28272	5.95556	190.078	21.4648	21.6559	NA	NA	NA	11.8769	NA		206.8	5.28272	2.5545	5.95556	2.88867
UK056	UK056_113	NA	491	9690	8.33	0.0933857	NA	NA	30.656	2.24909	0.0515	8.38428	NA	NA	0.231629	8.6807	0.03262	2.24909	-0.068596	NA	NA	NA	NA	NA	206.925	4.58004	5.34297	211.542	16.5781	16.877	NA	NA	NA	59.8373	NA		206.925	4.58004	2.21338	5.34297	2.57719
UK056	UK056_284	NA	227	4450	3.5	0.110759	NA	NA	30.6279	2.28835	0.0555	9.75724	NA	NA	0.249849	10.022	0.03265	2.28835	0.049687	NA	NA	NA	NA	NA	207.112	4.66414	5.41648	226.453	20.3452	20.621	NA	NA	NA	6.32445	NA		207.112	4.66414	2.25198	5.41648	2.60581
UK056	UK056_100	NA	192	3730	3.04	0.102357	NA	NA	30.4878	2.51429	0.0523	10.3684	NA	NA	0.236525	10.6689	0.0328	2.51429	0.070124	NA	NA	NA	NA	NA	208.049	5.14744	5.84361	215.571	20.7245	20.9726	NA	NA	NA	47.5211	NA		208.049	5.14744	2.47415	5.84361	2.80446
UK056	UK056_123	NA	143	3220	2.77	0.101465	NA	NA	30.4785	2.4709	0.0451	11.0906	NA	NA	0.204025	11.3625	0.03281	2.4709	0.28835	NA	NA	NA	NA	NA	208.111	5.0601	5.76722	188.527	19.5526	19.7591	NA	NA	NA	3.46851	NA		208.111	5.0601	2.43144	5.76722	2.76941
UK056	UK056_216	NA	1162	23770	13	0.103339	NA	NA	30.4507	2.22955	0.0529	7.1874	NA	NA	0.23953	7.52527	0.03284	2.22955	0.25636	NA	NA	NA	NA	NA	208.298	4.56988	5.34356	218.036	14.7668	15.12	NA	NA	NA	17.5054	NA		208.298	4.56988	2.19391	5.34356	2.56336
UK056	UK056_267	NA	539	11500	9.7	0.101042	NA	NA	30.4044	2.22495	0.0526	8.23996	NA	NA	0.238534	8.53507	0.03289	2.22495	0.16827	NA	NA	NA	NA	NA	208.61	4.56719	5.34337	217.22	16.6924	17.0036	NA	NA	NA	29.9997	NA		208.61	4.56719	2.18934	5.34337	2.55839
UK056	UK056_235	NA	181	3550	5.29	0.0998113	NA	NA	30.2389	2.40554	0.0552	10.3155	NA	NA	0.251695	10.5923	0.03307	2.40554	0.10272	NA	NA	NA	NA	NA	209.734	4.96404	5.69349	227.952	21.6303	21.893	NA	NA	NA	9.57158	NA		209.734	4.96404	2.36683	5.69349	2.70808
UK056	UK056_118	NA	1245	25800	30.5	0.0962145	NA	NA	30.03	2.16041	0.0486	7.17606	NA	NA	0.223142	7.49421	0.0333	2.16041	-0.13958	NA	NA	NA	NA	NA	211.169	4.4882	5.29368	204.522	13.8831	14.218	NA	NA	NA	37.9777	NA		211.169	4.4882	2.12541	5.29368	2.51683
UK056	UK056_228	NA	1187	24800	36.2	0.102841	NA	NA	30.012	2.19166	0.0525	7.24646	NA	NA	0.241193	7.57064	0.03332	2.19166	0.12894	NA	NA	NA	NA	NA	211.294	4.55576	5.35194	219.397	14.9389	15.2921	NA	NA	NA	28.308	NA		211.294	4.55576	2.15613	5.35194	2.52789
UK056	UK056_296	NA	511	10250	18.55	0.107474	NA	NA	29.9222	2.26603	0.0549	8.24359	NA	NA	0.252976	8.54936	0.03342	2.26603	-0.060617	NA	NA	NA	NA	NA	211.917	4.72405	5.50007	228.991	17.5285	17.8542	NA	NA	NA	6.57636	NA		211.917	4.72405	2.22919	5.50007	2.57897
UK056	UK056_189	NA	329	6780	5.51	0.103571	NA	NA	29.7796	2.24618	0.0485	9.15394	NA	NA	0.224556	9.4255	0.03358	2.24618	0.012437	NA	NA	NA	NA	NA	212.915	4.70434	5.48987	205.694	17.5518	17.8206	NA	NA	NA	42.3807	NA		212.915	4.70434	2.20949	5.48987	2.58412
UK056	UK056_38	NA	240	4800	6.81	0.103969	NA	NA	29.6121	2.3297	0.0525	10.1445	NA	NA	0.244451	10.4086	0.03377	2.3297	-0.10646	NA	NA	NA	NA	NA	214.1	4.90597	5.67136	222.059	20.7632	21.0243	NA	NA	NA	46.7525	NA		214.1	4.90597	2.29143	5.67136	2.64179
UK056	UK056_146	NA	210	3920	2.63	0.119437	NA	NA	29.1715	2.41108	0.0545	9.75967	NA	NA	0.257596	10.0531	0.03428	2.41108	0.1521	NA	NA	NA	NA	NA	217.28	5.15149	5.90523	232.728	20.9116	21.1934	NA	NA	NA	13.9536	NA		217.28	5.15149	2.3709	5.90523	2.71346
UK056	UK056_111	NA	2110	44300	61.5	0.0984	NA	NA	29.0951	2.14569	0.0491	6.62921	NA	NA	0.232682	6.96782	0.03437	2.14569	0.03927	NA	NA	NA	NA	NA	217.841	4.5961	5.43143	212.41	13.3556	13.7275	NA	NA	NA	43.5282	NA		217.841	4.5961	2.10985	5.43143	2.49934
UK056	UK056_36	NA	231	4840	4.13	0.113151	NA	NA	28.9771	2.33175	0.0528	9.77345	NA	NA	0.251235	10.0478	0.03451	2.33175	-0.045796	NA	NA	NA	NA	NA	218.713	5.01431	5.79531	227.579	20.488	20.7643	NA	NA	NA	40.7198	NA		218.713	5.01431	2.29264	5.79531	2.64276
UK056	UK056_197	NA	341	7030	5	0.108932	NA	NA	28.7522	2.25927	0.0511	8.87983	NA	NA	0.245048	9.16273	0.03478	2.25927	0.040172	NA	NA	NA	NA	NA	220.395	4.89518	5.70379	222.546	18.3133	18.61	NA	NA	NA	81.8865	NA		220.395	4.89518	2.22109	5.70379	2.58653
UK056	UK056_55	NA	797	16170	16.6	0.101903	NA	NA	28.5633	2.21229	0.0511	7.92129	NA	NA	0.246669	8.22442	0.03501	2.21229	-0.13622	NA	NA	NA	NA	NA	221.828	4.824	5.65256	223.867	16.5248	16.8564	NA	NA	NA	81.9302	NA		221.828	4.824	2.17466	5.65256	2.54566
UK056	UK056_291	NA	222	4800	4.42	0.0962963	NA	NA	28.5388	2.2948	0.0518	9.85689	NA	NA	0.250262	10.1205	0.03504	2.2948	-0.027324	NA	NA	NA	NA	NA	222.015	5.00807	5.81167	226.789	20.5724	20.846	NA	NA	NA	65.4671	NA		222.015	5.00807	2.25574	5.81167	2.61426
UK056	UK056_294	NA	381	8860	11.38	0.114257	NA	NA	28.4738	2.21927	0.0459	8.74016	NA	NA	0.222264	9.01751	0.03512	2.21927	0.05988	NA	NA	NA	NA	NA	222.513	4.85391	5.68274	203.792	16.6517	16.9301	NA	NA	NA	2.695	NA		222.513	4.85391	2.1814	5.68274	2.56819
UK056	UK056_126	NA	409	7830	7.93	0.102587	NA	NA	27.6932	2.31879	0.0504	8.80076	NA	NA	0.250934	9.10111	0.03611	2.31879	0.21534	NA	NA	NA	NA	NA	228.676	5.20957	6.02946	227.334	18.5395	18.8438	NA	NA	NA	88.2392	NA		228.676	5.20957	2.27815	6.02946	2.63699
UK056	UK056_223	NA	151	2890	2	0.0913242	NA	NA	27.6243	2.65298	0.0576	10.4636	NA	NA	0.287496	10.7947	0.0362	2.65298	0.061475	NA	NA	NA	NA	NA	229.236	5.97473	6.70496	256.587	24.48	24.7663	NA	NA	NA	2.95784	NA		229.236	5.97473	2.60637	6.70496	2.91056
UK056	UK056_154	NA	65	1446	3.85	0.122611	NA	NA	25	2.91576	0.048	13.7232	NA	NA	0.26473	14.0295	0.04	2.91576	0.030588	NA	NA	NA	NA	NA	252.833	7.22932	7.9678	238.471	29.8266	30.0337	NA	NA	NA	34.27	NA		252.833	7.22932	2.85933	7.9678	3.16043
UK056	UK056_206	NA	1180	22000	38.7	0.129866	NA	NA	22.0264	2.52275	0.0573	7.39668	NA	NA	0.358684	7.81506	0.0454	2.52275	0.36263	NA	NA	NA	NA	NA	286.218	7.06262	8.0118	311.232	20.9516	21.4168	NA	NA	NA	1.14214	NA		286.218	7.06262	2.46757	8.0118	2.80236
UK056	UK056_209	NA	1515	22800	26.1	0.507782	NA	NA	5.8548	2.17214	0.072	6.87576	NA	NA	1.69559	7.2107	0.1708	2.17214	0.11761	NA	NA	985.941	140.299	141.658	1016.52	20.4274	24.0569	1006.87	46.0864	47.2874	NA	NA	NA	68.7554	-3.1013		1016.52	20.4274	2.00954	24.0569	2.36962
UK056	UK056_98	NA	969	12940	15.3	0.564576	NA	NA	5.5991	2.23531	0.0765	7.55759	NA	NA	1.88384	7.88123	0.1786	2.23531	0.088503	NA	NA	1108.19	151.47	152.687	1059.32	21.836	25.5151	1075.42	52.3216	53.4657	NA	NA	NA	55.9637	4.40934		1059.32	21.836	2.06132	25.5151	2.40417
UK056	UK056_69	NA	3930	44600	49.7	0.62125	NA	NA	4.08831	2.20373	0.0899	6.00908	NA	NA	3.03192	6.40043	0.2446	2.20373	0.3928	NA	NA	1423.41	115.007	116.461	1410.57	27.9194	32.7494	1415.69	48.9081	50.5205	NA	NA	NA	82.3255	0.902012		1423.41	115.007	8.0797	116.461	8.25292
UK056	UK056_148	NA	9650	112000	255	0.677291	NA	NA	4.08664	2.15586	0.0902	5.29693	NA	NA	3.04328	5.71885	0.2447	2.15586	0.51722	NA	NA	1429.77	101.247	102.891	1411.08	27.3219	32.2445	1418.55	43.7336	45.5318	NA	NA	NA	69.3108	1.30671		1429.77	101.247	7.08139	102.891	7.28827
UK056	UK056_76	NA	3860	36500	49.3	0.824415	NA	NA	3.16857	2.16553	0.1065	6.03708	NA	NA	4.63434	6.41373	0.3156	2.16553	0.095362	NA	NA	1740.36	110.845	112.234	1768.21	33.4887	39.4728	1755.48	53.6153	55.3763	NA	NA	NA	67.2367	-1.60026		1740.36	110.845	6.36912	112.234	6.35942
UK056	UK056_19	NA	27260	260300	218.5	0.740678	NA	NA	3.15557	2.18838	0.1098	4.60801	NA	NA	4.79762	5.10125	0.3169	2.18838	0.73377	NA	NA	1796.09	83.9608	85.7556	1774.57	33.9479	39.8974	1784.48	42.8885	45.0937	NA	NA	NA	49.94	1.1981		1796.09	83.9608	4.67464	85.7556	4.83013
UK056	UK056_280	NA	16900	165000	66.1	0.909216	NA	NA	3.09789	2.2922	0.111	4.89732	NA	NA	4.94035	5.40721	0.3228	2.2922	0.83992	NA	NA	1815.85	89.0276	90.7151	1803.39	36.0591	41.8575	1809.18	45.6922	47.7892	NA	NA	NA	64.3036	0.686347		1815.85	89.0276	4.9028	90.7151	5.03262
UK056	UK056_40	NA	2758	24500	51.1	0.846026	NA	NA	3.06843	2.23567	0.1168	6.32277	NA	NA	5.24842	6.70639	0.3259	2.23567	0.33442	NA	NA	1907.82	113.756	115.057	1818.48	35.4246	41.3916	1860.52	57.2581	58.9811	NA	NA	NA	14.0966	4.68293		1907.82	113.756	5.96263	115.057	6.30278
UK056	UK056_45	NA	6920	60600	66.3	0.857697	NA	NA	3.04599	2.14628	0.1175	5.54156	NA	NA	5.31876	5.94268	0.3283	2.14628	0.34215	NA	NA	1918.54	99.5299	101.007	1830.14	34.1967	40.4088	1871.88	50.8339	52.7733	NA	NA	NA	10.3212	4.60803		1918.54	99.5299	5.18778	101.007	5.49302
UK056	UK056_220	NA	3720	35200	76.7	0.883641	NA	NA	2.93945	2.19904	0.1181	6.08759	NA	NA	5.53969	6.4726	0.3402	2.19904	0.29286	NA	NA	1927.67	109.251	110.598	1887.63	35.9849	42.2348	1906.78	55.7279	57.5259	NA	NA	NA	50.2306	2.07721		1927.67	109.251	5.66752	110.598	5.84643
UK056	UK056_124	NA	7050	61300	92.4	0.945752	NA	NA	2.75634	2.15804	0.1193	5.55072	NA	NA	5.96773	5.95547	0.3628	2.15804	0.18583	NA	NA	1945.77	99.3738	100.844	1995.43	37.0355	43.6958	1971.15	51.8371	53.8066	NA	NA	NA	39.8233	-2.55255		1945.77	99.3738	5.10718	100.844	5.07296
UK056	UK056_232	NA	15650	136900	163.4	0.93908	NA	NA	2.70197	2.15636	0.1239	4.9653	NA	NA	6.32254	5.41333	0.3701	2.15636	0.63545	NA	NA	2013.13	88.1707	89.7969	2029.87	37.5502	44.3128	2021.58	47.4942	49.6693	NA	NA	NA	65.6706	-0.831416		2013.13	88.1707	4.37978	89.7969	4.42749
UK056	UK056_214	NA	10460	85800	73.5	1.02941	NA	NA	2.69397	2.1585	0.1299	5.24435	NA	NA	6.64842	5.67118	0.3712	2.1585	0.44352	NA	NA	2096.61	92.2542	93.7812	2035.04	37.6688	44.4403	2065.8	50.0959	52.1907	NA	NA	NA	19.8699	2.93648		2096.61	92.2542	4.40016	93.7812	4.59145
UK056	UK056_226	NA	5690	41400	47.8	1.10138	NA	NA	2.37643	2.1589	0.148	5.70785	NA	NA	8.58695	6.10249	0.4208	2.1589	0.18225	NA	NA	2322.95	97.9817	99.3531	2264.11	41.2192	48.6265	2295.17	55.5557	57.5683	NA	NA	NA	32.5915	2.53279		2322.95	97.9817	4.21799	99.3531	4.36927
UK056	UK056_2	NA	112	2029	2.41	0.0630725	NA	NA	35.9712	2.49916	0.062	12.2902	NA	NA	0.23765	12.5417	0.0278	2.49916	-0.23978	NA	NA	NA	NA	NA	176.765	4.35761	4.95369	216.494	24.4575	24.6698	NA	NA	NA	0.250755	73.778
UK056	UK056_21	NA	385	6970	6.06	0.0900446	NA	NA	31.2402	2.22222	0.0577	8.81732	NA	NA	0.254661	9.09304	0.03201	2.22222	0.033257	NA	NA	NA	NA	NA	203.116	4.44331	5.20016	230.355	18.7424	19.0506	NA	NA	NA	0.48708	60.8179
UK056	UK056_31	NA	254	4590	6.05	0.072282	NA	NA	40.4531	2.35954	0.0589	9.55544	NA	NA	0.200754	9.84245	0.02472	2.35954	-0.051191	NA	NA	NA	NA	NA	157.418	3.66935	4.22837	185.764	16.7103	16.9451	NA	NA	NA	0.120146	72.0594
UK056	UK056_42	NA	1661	31700	61.2	0.0716628	NA	NA	40.3877	2.23412	0.0552	6.90643	NA	NA	0.188448	7.25879	0.02476	2.23412	0.24968	NA	NA	NA	NA	NA	157.669	3.47979	4.06668	175.304	11.6876	11.9878	NA	NA	NA	0.202476	62.4894
UK056	UK056_49	NA	87	1440	1.63	0.091573	NA	NA	41.1523	2.92399	0.0639	11.8855	NA	NA	0.214096	12.2398	0.0243	2.92399	-0.099865	NA	NA	NA	NA	NA	154.775	4.47171	4.92605	196.984	21.9194	22.1191	NA	NA	NA	0.0278307	79.0369
UK056	UK056_109	NA	63	1669	1.55	0.0688889	NA	NA	36.7647	2.67614	0.037	12.8885	NA	NA	0.138762	13.1634	0.0272	2.67614	0.27755	NA	NA	NA	NA	NA	173	4.56815	5.11737	131.941	16.2882	16.4166	NA	NA	NA	8.54794e-06	131.085
UK056	UK056_151	NA	9270	92600	82.8	0.429016	NA	NA	3.69004	2.36259	0.1076	5.3438	NA	NA	4.02053	5.84277	0.271	2.36259	0.70841	NA	NA	1759.17	97.8483	99.409	1545.88	32.4738	37.4093	1638.36	47.5445	49.4194	NA	NA	NA	1.67328e-05	12.1245
UK056	UK056_180	NA	519	8950	13.5	0.0822168	NA	NA	39.5883	2.24691	0.0608	8.25881	NA	NA	0.211757	8.559	0.02526	2.24691	0.21272	NA	NA	NA	NA	NA	160.814	3.56864	4.16417	195.026	15.1883	15.4699	NA	NA	NA	0.000579689	74.5615
UK056	UK056_184	NA	75	1980	2.06	0.0656051	NA	NA	53.2481	2.61837	0.0378	13.851	NA	NA	0.0978788	14.0963	0.01878	2.61837	0.27472	NA	NA	NA	NA	NA	119.941	3.11146	3.5013	94.8164	12.7613	12.849	NA	NA	NA	0.00339645	124.024
UK056	UK056_239	NA	206	3770	2.95	0.064978	NA	NA	46.9043	2.53717	0.0602	10.0376	NA	NA	0.176964	10.3533	0.02132	2.53717	0.054994	NA	NA	NA	NA	NA	135.993	3.41423	3.86819	165.445	15.8076	16.0085	NA	NA	NA	0.0277845	77.7342
UK056	UK056_249	NA	120	2160	1.68	0.0781395	NA	NA	54.9753	2.56233	0.0626	11.2716	NA	NA	0.157003	11.5592	0.01819	2.56233	0.01781	NA	NA	NA	NA	NA	116.207	2.95092	3.33605	148.077	15.9282	16.0908	NA	NA	NA	0.0100289	83.2717
UK056	UK056_261	NA	307	5970	8.74	0.0788097	NA	NA	39.4166	2.32534	0.0574	9.2819	NA	NA	0.200786	9.56875	0.02537	2.32534	-0.18345	NA	NA	NA	NA	NA	161.505	3.7089	4.28955	185.791	16.2476	16.4891	NA	NA	NA	0.548407	68.1408
UK056	UK056_275	NA	313	5770	9.91	0.0582941	NA	NA	57.0451	2.3046	0.059	9.424	NA	NA	0.142605	9.7017	0.01753	2.3046	-0.071337	NA	NA	NA	NA	NA	112.027	2.55946	2.96691	135.362	12.2953	12.473	NA	NA	NA	0.0286685	80.2456
UK056	UK056_278	NA	112	2040	1.93	0.0831897	NA	NA	55.9284	2.56241	0.0614	11.4944	NA	NA	0.151369	11.7765	0.01788	2.56241	0.17507	NA	NA	NA	NA	NA	114.244	2.9016	3.28027	143.12	15.7219	15.8765	NA	NA	NA	0.0234397	82.5122
UK056	UK056_288	NA	280	4640	6.89	0.103922	NA	NA	39.1389	2.36775	0.0661	9.27021	NA	NA	0.232859	9.56781	0.02555	2.36775	0.15746	NA	NA	NA	NA	NA	162.637	3.80267	4.37825	212.556	18.3514	18.6242	NA	NA	NA	7.78306e-06	79.9101
University of Calgary, Centre for Pure and Applied Tectonics and Thermochronology
Red Sandstone Mb ( 47.567228°, -111.102764°)		f206c	207Pb CPS	206Pb CPS	U (ppm)1	U/Th	206Pb/204Pb	1σ %	Data for Tera-Wasserburg plot2				208Pb/206Pb	2σx (%)	Data for Wetherill plot2					208Pb/232Th	2σx (%)	Dates									208Pb/232Th	2σx (ABS)	2σtotal (ABS)	Prob. Conc. (%)	% conc3	Comments	Accepted Dates4
Sample	Spot								238U/206Pb	2σx (%)	207Pb/206Pb	2σx (%)			207Pb/235Pb	2σx (%)	206Pb/238U	2σx (%)	Rho			207Pb/206Pb	2σx (ABS)	2σtotal (ABS)	206Pb/238U	2σx (ABS)	2σtotal (ABS)	207Pb/235Pb	2σx (ABS)	2σtotal (ABS)							Date (Ma)	2σx (ABS)	2σx (%)	2σtotal (ABS)	2σtotal (%)
UK055	UK055_170	NA	43	736	1.5	0.047619	NA	NA	60.6428	3.71066	0.048	17.5484	NA	NA	0.109135	17.9365	0.01649	3.71066	-0.0361	NA	NA	NA	NA	NA	105.434	3.88049	3.47061	105.174	17.9222	10.6161	NA	NA	NA	97.7469	NA		105.434	3.88049	3.68048	4.12974	3.91738
UK055	UK055_226	NA	109	2098	4.66	0.0402071	NA	NA	60.6061	3.17461	0.0536	11.6944	NA	NA	0.121941	12.1176	0.0165	3.17461	-0.072081	NA	NA	NA	NA	NA	105.498	3.32189	3.48908	116.83	13.3737	13.8259	NA	NA	NA	10.7388	NA		105.498	3.32189	3.14878	3.61025	3.39596
UK055	UK055_158	NA	123	2460	14.8	0.0477419	NA	NA	60.4595	3.17311	0.0513	12.2018	NA	NA	0.116991	12.6076	0.01654	3.17311	-0.064482	NA	NA	NA	NA	NA	105.752	3.32823	3.53687	112.341	13.4089	12.6842	NA	NA	NA	34.8633	NA		105.752	3.32823	3.14722	3.6174	3.40571
UK055	UK055_45	NA	100	1980	3.8	0.0513514	NA	NA	60.3865	3.31388	0.0546	12.5099	NA	NA	0.124668	12.9414	0.01656	3.31388	0.079503	NA	NA	NA	NA	NA	105.878	3.48003	3.40266	119.295	14.567	10.4634	NA	NA	NA	6.97215	NA		105.878	3.48003	3.28682	3.75817	3.5332
UK055	UK055_269	NA	211	4840	19.7	0.0437778	NA	NA	59.9161	3.03122	0.0463	10.0482	NA	NA	0.106546	10.4955	0.01669	3.03122	-0.096174	NA	NA	NA	NA	NA	106.703	3.20777	3.59735	102.801	10.2616	11.5457	NA	NA	NA	47.9093	NA		106.703	3.20777	3.00627	3.51201	3.30479
UK055	UK055_116	NA	89	2025	7.48	0.0524912	NA	NA	59.8802	3.15557	0.0466	12.4105	NA	NA	0.107301	12.8054	0.0167	3.15557	0.027422	NA	NA	NA	NA	NA	106.766	3.34133	3.65329	103.493	12.6004	12.0343	NA	NA	NA	61.2653	NA		106.766	3.34133	3.12958	3.63474	3.41067
UK055	UK055_281	NA	156	3050	5	0.0520833	NA	NA	59.8444	3.08948	0.0504	11.3996	NA	NA	0.11612	11.8108	0.01671	3.08948	0.084206	NA	NA	NA	NA	NA	106.829	3.27328	3.65397	111.549	12.4775	13.4338	NA	NA	NA	45.583	NA		106.829	3.27328	3.06402	3.57262	3.33756
UK055	UK055_8	NA	164	3990	13.4	0.0465278	NA	NA	59.6659	3.04837	0.0443	12.0374	NA	NA	0.102371	12.4174	0.01676	3.04837	-0.10364	NA	NA	NA	NA	NA	107.147	3.23923	3.64759	98.963	11.7093	12.1758	NA	NA	NA	18.7815	NA		107.147	3.23923	3.02318	3.54316	3.33063
UK055	UK055_61	NA	139	2780	6.75	0.0475018	NA	NA	59.5948	3.1193	0.0528	11.2683	NA	NA	0.122159	11.692	0.01678	3.1193	-0.12191	NA	NA	NA	NA	NA	107.273	3.31849	3.46463	117.028	12.9246	9.85627	NA	NA	NA	15.6981	NA		107.273	3.31849	3.09349	3.61643	3.34527
UK055	UK055_277	NA	85	1649	5.06	0.0540021	NA	NA	58.8582	3.38817	0.0525	12.5491	NA	NA	0.122986	12.9985	0.01699	3.38817	-0.015689	NA	NA	NA	NA	NA	108.605	3.64889	3.70871	117.775	14.4554	13.9514	NA	NA	NA	22.213	NA		108.605	3.64889	3.35979	3.92832	3.59812
UK055	UK055_111	NA	122	2250	6.93	0.0444231	NA	NA	58.7889	3.16759	0.0544	12.0254	NA	NA	0.127586	12.4356	0.01701	3.16759	0.10416	NA	NA	NA	NA	NA	108.731	3.41528	3.68531	121.927	14.2882	14.6971	NA	NA	NA	6.73665	NA		108.731	3.41528	3.14103	3.71301	3.402
UK055	UK055_150	NA	60	1185	2.13	0.05	NA	NA	58.3771	3.19819	0.051	14.0247	NA	NA	0.120456	14.3847	0.01713	3.19819	0.1557	NA	NA	NA	NA	NA	109.492	3.47219	3.69327	115.485	15.7036	12.9027	NA	NA	NA	44.1941	NA		109.492	3.47219	3.17118	3.76934	3.43985
UK055	UK055_224	NA	104	2280	13.7	0.0472414	NA	NA	58.2411	3.13965	0.0526	12.289	NA	NA	0.124525	12.6837	0.01717	3.13965	0.1863	NA	NA	NA	NA	NA	109.745	3.41646	3.53759	119.166	14.2624	10.3644	NA	NA	NA	18.1328	NA		109.745	3.41646	3.11307	3.71939	3.38545
UK055	UK055_253	NA	51	1034	3.13	0.0487539	NA	NA	57.971	3.44434	0.049	15.0995	NA	NA	0.116543	15.4874	0.01725	3.44434	-0.0051693	NA	NA	NA	NA	NA	110.252	3.76518	3.7953	111.933	16.4156	15.3473	NA	NA	NA	84.2081	NA		110.252	3.76518	3.41506	4.04452	3.66557
UK055	UK055_21	NA	150	3280	5.27	0.0483486	NA	NA	57.5043	3.12198	0.0444	11.2787	NA	NA	0.106459	11.7028	0.01739	3.12198	-0.17594	NA	NA	NA	NA	NA	111.14	3.44002	3.94331	102.721	11.4337	12.747	NA	NA	NA	17.682	NA		111.14	3.44002	3.09523	3.74836	3.4038
UK055	UK055_140	NA	112	2170	5.59	0.0517593	NA	NA	57.241	3.36104	0.0502	12.5771	NA	NA	0.12092	13.0185	0.01747	3.36104	0.12061	NA	NA	NA	NA	NA	111.646	3.72018	3.76983	115.906	14.2607	13.8795	NA	NA	NA	55.2049	NA		111.646	3.72018	3.33211	4.00953	3.58634
UK055	UK055_176	NA	88	1810	4.86	0.0569087	NA	NA	57.1755	3.20782	0.0549	12.5533	NA	NA	0.132393	12.9567	0.01749	3.20782	-0.23245	NA	NA	NA	NA	NA	111.773	3.55457	3.71002	126.245	15.3824	12.8303	NA	NA	NA	8.25015	NA		111.773	3.55457	3.18017	3.85702	3.41047
UK055	UK055_153	NA	110	2130	13.5	0.05625	NA	NA	56.8505	3.12643	0.0545	12.1666	NA	NA	0.132179	12.5619	0.01759	3.12643	0.030925	NA	NA	NA	NA	NA	112.407	3.48385	3.81543	126.054	14.8924	15.1518	NA	NA	NA	7.40743	NA		112.407	3.48385	3.09933	3.79527	3.35814
UK055	UK055_222	NA	105	2400	13.5	0.054878	NA	NA	56.6893	3.14612	0.0452	12.2763	NA	NA	0.109936	12.673	0.01764	3.14612	0.042111	NA	NA	NA	NA	NA	112.723	3.51559	3.81099	105.906	12.7459	11.6944	NA	NA	NA	29.574	NA		112.723	3.51559	3.11878	3.82609	3.40697
UK055	UK055_70	NA	438	9280	20.9	0.0434511	NA	NA	56.4972	2.94506	0.0492	8.66034	NA	NA	0.120071	9.1474	0.0177	2.94506	0.1366	NA	NA	NA	NA	NA	113.103	3.30191	3.83459	115.137	9.95716	11.0051	NA	NA	NA	68.6092	NA		113.103	3.30191	2.91937	3.63283	3.2083
UK055	UK055_214	NA	109	2140	5.56	0.0500901	NA	NA	56.2746	3.13141	0.0554	11.0749	NA	NA	0.135737	11.5091	0.01777	3.13141	0.15758	NA	NA	NA	NA	NA	113.547	3.52449	3.91769	129.24	13.9675	15.8525	NA	NA	NA	2.45357	NA		113.547	3.52449	3.10399	3.83858	3.36983
UK055	UK055_86	NA	302	5880	22.9	0.0528868	NA	NA	56.2746	3.14196	0.0559	9.46568	NA	NA	0.136962	9.97351	0.01777	3.14196	-0.16267	NA	NA	NA	NA	NA	113.547	3.53636	3.73218	130.334	12.1998	14.2656	NA	NA	NA	1.17707	NA		113.547	3.53636	3.11445	3.84949	3.3361
UK055	UK055_67	NA	566	12130	74.5	0.0492725	NA	NA	55.9597	2.96316	0.0504	8.24519	NA	NA	0.124181	8.76148	0.01787	2.96316	0.19158	NA	NA	NA	NA	NA	114.18	3.35355	3.83541	118.856	9.82745	13.3642	NA	NA	NA	33.8847	NA		114.18	3.35355	2.93707	3.68574	3.22125
UK055	UK055_6	NA	61	1397	3.8	0.0568862	NA	NA	55.2792	3.23098	0.0486	13.5255	NA	NA	0.121221	13.906	0.01809	3.23098	0.00065285	NA	NA	NA	NA	NA	115.573	3.70088	4.17814	116.178	15.2669	14.3857	NA	NA	NA	93.8653	NA		115.573	3.70088	3.20219	4.01145	3.46991
UK055	UK055_207	NA	202	4190	29	0.0506993	NA	NA	55.1876	3.06336	0.0506	10.2309	NA	NA	0.126418	10.6797	0.01812	3.06336	0.12173	NA	NA	NA	NA	NA	115.763	3.51459	4.01798	120.874	12.1708	15.9601	NA	NA	NA	40.51	NA		115.763	3.51459	3.03602	3.84128	3.31133
UK055	UK055_272	NA	99	1965	3.13	0.0558929	NA	NA	54.8546	3.10792	0.0505	11.382	NA	NA	0.126934	11.7987	0.01823	3.10792	0.16134	NA	NA	NA	NA	NA	116.46	3.58698	4.18083	121.339	13.4949	15.0102	NA	NA	NA	46.7173	NA		116.46	3.58698	3.08001	3.91129	3.35458
UK055	UK055_239	NA	24.2	440	1.69	0.0928571	NA	NA	54.6448	4.08148	0.058	22.4009	NA	NA	0.146346	22.7697	0.0183	4.08148	-0.075976	NA	NA	NA	NA	NA	116.903	4.72837	4.28628	138.68	29.524	20.1928	NA	NA	NA	15.3921	NA		116.903	4.72837	4.0447	4.98073	4.23281
UK055	UK055_191	NA	39	694	1.29	0.052439	NA	NA	54.6448	4.25959	0.061	17.0244	NA	NA	0.153915	17.5492	0.0183	4.25959	0.12942	NA	NA	NA	NA	NA	116.903	4.9347	4.06024	145.363	23.7725	18.646	NA	NA	NA	1.7537	NA		116.903	4.9347	4.2212	5.17701	4.41233
UK055	UK055_51	NA	413	9260	16.5	0.0520505	NA	NA	54.407	2.95688	0.0478	8.57187	NA	NA	0.121136	9.06753	0.01838	2.95688	0.048907	NA	NA	NA	NA	NA	117.409	3.44024	4.1325	116.102	9.9483	15.0645	NA	NA	NA	80.0711	NA		117.409	3.44024	2.93012	3.78239	3.22494
UK055	UK055_254	NA	75	1390	10.8	0.0493151	NA	NA	54.0541	3.28486	0.056	13.2282	NA	NA	0.142844	13.63	0.0185	3.28486	-0.088784	NA	NA	NA	NA	NA	118.169	3.84632	4.62398	135.574	17.2998	22.8642	NA	NA	NA	5.56245	NA		118.169	3.84632	3.25493	4.15899	3.48748
UK055	UK055_108	NA	156	3240	6.61	0.0579825	NA	NA	53.8793	3.02817	0.051	11.1397	NA	NA	0.130512	11.544	0.01856	3.02817	0.030092	NA	NA	NA	NA	NA	118.549	3.55705	4.1609	124.557	13.5327	15.2801	NA	NA	NA	38.8105	NA		118.549	3.55705	3.0005	3.89507	3.27607
UK055	UK055_263	NA	40	885	2.69	0.055123	NA	NA	53.8213	3.39403	0.048	16.1788	NA	NA	0.122967	16.5309	0.01858	3.39403	0.12705	NA	NA	NA	NA	NA	118.675	3.99103	4.07526	117.758	18.3822	14.4902	NA	NA	NA	92.0161	NA		118.675	3.99103	3.36298	4.29565	3.62022
UK055	UK055_118	NA	73	1510	4.15	0.0427835	NA	NA	53.7634	3.23384	0.0502	13.2777	NA	NA	0.128741	13.6658	0.0186	3.23384	0.31802	NA	NA	NA	NA	NA	118.802	3.80668	4.23556	122.966	15.8279	16.5127	NA	NA	NA	58.0934	NA		118.802	3.80668	3.20423	4.12559	3.4752
UK055	UK055_141	NA	133	2520	11.1	0.047234	NA	NA	53.3618	3.27443	0.0505	12.5072	NA	NA	0.130485	12.9287	0.01874	3.27443	-0.29367	NA	NA	NA	NA	NA	119.688	3.88293	4.33196	124.534	15.1536	19.4736	NA	NA	NA	56.2633	NA		119.688	3.88293	3.24422	4.20051	3.49323
UK055	UK055_157	NA	55	1235	3.1	0.0558559	NA	NA	53.3618	3.33487	0.049	13.7622	NA	NA	0.12661	14.1605	0.01874	3.33487	0.065389	NA	NA	NA	NA	NA	119.688	3.95461	4.40634	121.047	16.1599	16.533	NA	NA	NA	86.8316	NA		119.688	3.95461	3.3041	4.26686	3.56327
UK055	UK055_249	NA	35	761	2.37	0.0553738	NA	NA	53.2481	3.57409	0.043	17.3722	NA	NA	0.111344	17.7361	0.01878	3.57409	0.037279	NA	NA	NA	NA	NA	119.941	4.24716	4.41429	107.194	18.0447	18.7794	NA	NA	NA	16.3034	NA		119.941	4.24716	3.54105	4.54052	3.80416
UK055	UK055_73	NA	24.7	709	1.14	0.0385135	NA	NA	52.6316	3.8434	0.042	19.6265	NA	NA	0.110028	19.9993	0.019	3.8434	-0.12853	NA	NA	NA	NA	NA	121.333	4.6197	4.59272	105.991	20.1313	17.9303	NA	NA	NA	14.5627	NA		121.333	4.6197	3.80746	4.89685	4.07453
UK055	UK055_114	NA	34.3	693	1.26	0.0518519	NA	NA	52.6316	3.8434	0.05	16.6301	NA	NA	0.130986	17.0684	0.019	3.8434	0.12025	NA	NA	NA	NA	NA	121.333	4.6197	3.89485	124.983	20.0746	10.9657	NA	NA	NA	71.6193	NA		121.333	4.6197	3.80746	4.89685	4.03284
UK055	UK055_294	NA	22.2	439	0.9	0.0592105	NA	NA	52.0833	3.82538	0.065	20.7238	NA	NA	0.172074	21.0739	0.0192	3.82538	-0.01864	NA	NA	NA	NA	NA	122.598	4.64552	3.94382	161.217	31.4249	12.502	NA	NA	NA	1.72087	NA		122.598	4.64552	3.78923	4.92678	3.99001
UK055	UK055_135	NA	74	1320	2.76	0.0585987	NA	NA	51.9481	3.46145	0.059	13.97	NA	NA	0.156597	14.3925	0.01925	3.46145	-0.1389	NA	NA	NA	NA	NA	122.914	4.21431	4.64375	147.72	19.789	23.5883	NA	NA	NA	1.82451	NA		122.914	4.21431	3.42866	4.52399	3.63201
UK055	UK055_103	NA	41	986	1.6	0.0503145	NA	NA	51.8941	3.46029	0.043	18.055	NA	NA	0.114249	18.3836	0.01927	3.46029	-0.056356	NA	NA	NA	NA	NA	123.041	4.21719	3.96339	109.845	19.1418	8.84307	NA	NA	NA	18.0675	NA		123.041	4.21719	3.42748	4.52728	3.7024
UK055	UK055_115	NA	43	830	1.55	0.0654008	NA	NA	51.8135	3.56684	0.059	16.6981	NA	NA	0.157004	17.0748	0.0193	3.56684	-0.078146	NA	NA	NA	NA	NA	123.23	4.35369	4.12607	148.077	23.5309	19.0096	NA	NA	NA	4.27811	NA		123.23	4.35369	3.53296	4.65559	3.74428
UK055	UK055_18	NA	88	2120	3.56	0.0689922	NA	NA	51.3611	3.19143	0.0445	12.5257	NA	NA	0.119461	12.9259	0.01947	3.19143	0.070206	NA	NA	NA	NA	NA	124.305	3.92912	4.01177	114.584	14.0067	11.1931	NA	NA	NA	17.1446	NA		124.305	3.92912	3.16086	4.26674	3.44802
UK055	UK055_134	NA	51	892	3.32	0.068595	NA	NA	45.7038	3.3538	0.056	15.8563	NA	NA	0.168942	16.2071	0.02188	3.3538	0.13075	NA	NA	NA	NA	NA	139.527	4.62916	4.48322	158.5	23.788	14.3387	NA	NA	NA	11.1513	NA		139.527	4.62916	3.31776	4.99071	3.57116
UK055	UK055_25	NA	88	1924	7.63	0.0747307	NA	NA	43.573	3.09859	0.0463	13.34	NA	NA	0.146509	13.6951	0.02295	3.09859	0.0021696	NA	NA	NA	NA	NA	146.273	4.48137	4.80162	138.825	17.7716	12.1354	NA	NA	NA	41.4565	NA		146.273	4.48137	3.0637	4.88889	3.35253
UK055	UK055_50	NA	436	9030	20.5	0.0563187	NA	NA	43.4972	2.94522	0.052	8.69079	NA	NA	0.164833	9.17628	0.02299	2.94522	-0.1593	NA	NA	NA	NA	NA	146.525	4.26682	4.83959	154.925	13.1856	15.8628	NA	NA	NA	24.7802	NA		146.525	4.26682	2.91201	4.69439	3.18039
UK055	UK055_1	NA	136	2800	5.93	0.0630851	NA	NA	43.3463	3.16015	0.0504	11.0147	NA	NA	0.160317	11.459	0.02307	3.16015	-0.099448	NA	NA	NA	NA	NA	147.029	4.59375	4.68101	150.981	16.0774	12.456	NA	NA	NA	64.5532	NA		147.029	4.59375	3.12438	4.99602	3.38921
UK055	UK055_105	NA	101	1826	6.41	0.0619923	NA	NA	43.1034	3.31132	0.059	12.6495	NA	NA	0.18873	13.0757	0.0232	3.31132	-0.071948	NA	NA	NA	NA	NA	147.848	4.84001	5.02354	175.545	21.0822	18.6668	NA	NA	NA	1.27021	NA		147.848	4.84001	3.27363	5.22743	3.49515
UK055	UK055_39	NA	832	17360	57.2	0.0669006	NA	NA	43.0293	2.95314	0.0504	7.67246	NA	NA	0.161498	8.22117	0.02324	2.95314	0.24268	NA	NA	NA	NA	NA	148.1	4.32376	4.91711	152.014	11.6073	17.6533	NA	NA	NA	49.1589	NA		148.1	4.32376	2.91948	4.75482	3.20631
UK055	UK055_241	NA	197	3960	22.2	0.0666667	NA	NA	42.1763	3.05515	0.0493	10.4779	NA	NA	0.161168	10.9142	0.02371	3.05515	-0.23202	NA	NA	NA	NA	NA	151.061	4.56147	4.89651	151.725	15.383	13.5378	NA	NA	NA	93.779	NA		151.061	4.56147	3.01963	4.98764	3.29989
UK055	UK055_278	NA	101	2330	9.3	0.067148	NA	NA	42.0345	3.07462	0.0495	12.0051	NA	NA	0.162368	12.3926	0.02379	3.07462	-0.048423	NA	NA	NA	NA	NA	151.564	4.60567	4.85245	152.774	17.5789	12.7668	NA	NA	NA	89.5367	NA		151.564	4.60567	3.03876	5.03077	3.31727
UK055	UK055_84	NA	732	15920	64.9	0.0649	NA	NA	41.9815	2.95807	0.0504	7.78783	NA	NA	0.165529	8.33069	0.02382	2.95807	0.29718	NA	NA	NA	NA	NA	151.753	4.43654	4.82138	155.531	12.0138	12.6673	NA	NA	NA	51.2024	NA		151.753	4.43654	2.92352	4.87745	3.21179
UK055	UK055_225	NA	381	7840	33.3	0.0776224	NA	NA	41.8936	3.03265	0.0529	8.69062	NA	NA	0.174104	9.20455	0.02387	3.03265	0.15634	NA	NA	NA	NA	NA	152.068	4.55772	6.12273	162.975	13.86	30.2244	NA	NA	NA	11.823	NA		152.068	4.55772	2.99716	4.98961	3.26825
UK055	UK055_117	NA	236	5550	29.5	0.0772251	NA	NA	41.4079	2.96524	0.0452	9.75539	NA	NA	0.150507	10.1961	0.02415	2.96524	0.081652	NA	NA	NA	NA	NA	153.831	4.50745	6.19286	142.36	13.5443	22.7823	NA	NA	NA	9.77149	NA		153.831	4.50745	2.93014	4.95334	3.23945
UK055	UK055_243	NA	298	6280	32.8	0.0705376	NA	NA	41.1353	2.95369	0.0486	9.16474	NA	NA	0.162901	9.62896	0.02431	2.95369	-0.11417	NA	NA	NA	NA	NA	154.838	4.51894	4.99943	153.239	13.6967	13.8591	NA	NA	NA	83.001	NA		154.838	4.51894	2.9185	4.96931	3.21348
UK055	UK055_62	NA	201	4760	19.9	0.0686207	NA	NA	41.0678	3.01943	0.0441	10.501	NA	NA	0.14806	10.9265	0.02435	3.01943	-0.063	NA	NA	NA	NA	NA	155.09	4.62694	5.06907	140.198	14.3091	14.4725	NA	NA	NA	5.04255	NA		155.09	4.62694	2.9834	5.06907	3.30363
UK055	UK055_205	NA	176	3510	15.1	0.0683258	NA	NA	41.0678	3.07145	0.051	10.2552	NA	NA	0.171226	10.7052	0.02435	3.07145	-0.13189	NA	NA	NA	NA	NA	155.09	4.70665	5.54071	160.483	15.8925	24.1881	NA	NA	NA	53.0463	NA		155.09	4.70665	3.03479	5.14193	3.30303
UK055	UK055_139	NA	39	734	1.9	0.0798319	NA	NA	40.9836	3.82792	0.054	18.3757	NA	NA	0.181671	18.7702	0.0244	3.82792	-0.037339	NA	NA	NA	NA	NA	155.404	5.87763	4.98592	169.497	29.3094	14.8157	NA	NA	NA	35.2099	NA		155.404	5.87763	3.78215	6.23302	3.99474
UK055	UK055_183	NA	327	6730	45.2	0.0614966	NA	NA	40.7997	2.98828	0.0492	8.97715	NA	NA	0.166268	9.46145	0.02451	2.98828	0.053815	NA	NA	NA	NA	NA	156.096	4.60858	6.25675	156.175	13.697	30.6093	NA	NA	NA	99.114	NA		156.096	4.60858	2.95239	5.05777	3.24001
UK055	UK055_120	NA	151	3450	11.2	0.0670659	NA	NA	40.7997	3.08241	0.0453	10.5907	NA	NA	0.153089	11.0302	0.02451	3.08241	-0.028264	NA	NA	NA	NA	NA	156.096	4.75374	4.95625	144.635	14.8704	11.8143	NA	NA	NA	14.3432	NA		156.096	4.75374	3.04539	5.19039	3.34986
UK055	UK055_292	NA	82	1670	6.82	0.0818727	NA	NA	40.7166	3.1324	0.0502	12.9888	NA	NA	0.169994	13.3612	0.02456	3.1324	-0.094198	NA	NA	NA	NA	NA	156.411	4.84046	5.03172	159.414	19.7142	14.2361	NA	NA	NA	77.2388	NA		156.411	4.84046	3.09471	5.27157	3.36547
UK055	UK055_146	NA	430	8670	38.4	0.065529	NA	NA	40.4858	3.00879	0.0515	8.83311	NA	NA	0.17539	9.33149	0.0247	3.00879	0.13546	NA	NA	NA	NA	NA	157.292	4.67531	5.03037	164.086	14.1394	15.0961	NA	NA	NA	34.2639	NA		157.292	4.67531	2.97238	5.12509	3.24956
UK055	UK055_189	NA	342	7250	27.2	0.0693878	NA	NA	40.4694	2.97533	0.0482	9.12881	NA	NA	0.164218	9.60145	0.02471	2.97533	-0.045671	NA	NA	NA	NA	NA	157.355	4.62514	5.11012	154.389	13.7524	13.7917	NA	NA	NA	68.6364	NA		157.355	4.62514	2.93931	5.07971	3.23506
UK055	UK055_124	NA	309	5800	25.7	0.0755882	NA	NA	40.4204	2.9968	0.0552	8.9996	NA	NA	0.188296	9.48544	0.02474	2.9968	0.037884	NA	NA	NA	NA	NA	157.543	4.66404	5.13319	175.174	15.2629	15.2496	NA	NA	NA	2.66342	NA		157.543	4.66404	2.96048	5.11617	3.22059
UK055	UK055_210	NA	81	1870	7.3	0.0741117	NA	NA	40.3551	3.17386	0.0445	12.9287	NA	NA	0.152042	13.3125	0.02478	3.17386	0.046481	NA	NA	NA	NA	NA	157.795	4.94739	5.11373	143.713	17.8414	14.2688	NA	NA	NA	12.1309	NA		157.795	4.94739	3.13533	5.37705	3.42664
UK055	UK055_285	NA	226	4320	19.5	0.0758755	NA	NA	40.3226	3.14221	0.0519	9.92009	NA	NA	0.177468	10.4059	0.0248	3.14221	0.045372	NA	NA	NA	NA	NA	157.921	4.90192	5.11744	165.88	15.9263	15.7674	NA	NA	NA	33.4804	NA		157.921	4.90192	3.10403	5.33589	3.36614
UK055	UK055_286	NA	60	1105	4.58	0.0857678	NA	NA	40.3226	3.46651	0.052	15.7595	NA	NA	0.17781	16.1362	0.0248	3.46651	-0.055348	NA	NA	NA	NA	NA	157.921	5.40784	5.076	166.174	24.74	14.8119	NA	NA	NA	52.0728	NA		157.921	5.40784	3.4244	5.8041	3.66472
UK055	UK055_5	NA	476	9820	36.1	0.0705078	NA	NA	40.2901	2.923	0.0505	8.2181	NA	NA	0.17282	8.72245	0.02482	2.923	0.26788	NA	NA	NA	NA	NA	158.047	4.56353	5.1373	161.863	13.0513	15.1003	NA	NA	NA	54.593	NA		158.047	4.56353	2.88746	5.02749	3.17871
UK055	UK055_7	NA	129	2340	7.98	0.0840885	NA	NA	40.2414	3.18007	0.0531	11.5175	NA	NA	0.181937	11.9484	0.02485	3.18007	0.13029	NA	NA	NA	NA	NA	158.235	4.97075	5.1256	169.726	18.6774	16.4773	NA	NA	NA	22.1235	NA		158.235	4.97075	3.14136	5.40081	3.40445
UK055	UK055_75	NA	485	10840	57.6	0.0682464	NA	NA	40.1606	2.94412	0.0466	8.34278	NA	NA	0.159988	8.84703	0.0249	2.94412	0.30431	NA	NA	NA	NA	NA	158.55	4.61097	5.25525	150.692	12.3903	15.1714	NA	NA	NA	18.2519	NA		158.55	4.61097	2.90821	5.07336	3.20445
UK055	UK055_167	NA	211	4700	16	0.0769231	NA	NA	40.1606	2.9894	0.0474	10.0839	NA	NA	0.162734	10.5176	0.0249	2.9894	0.15498	NA	NA	NA	NA	NA	158.55	4.68188	5.1102	153.094	14.9478	13.0942	NA	NA	NA	46.4488	NA		158.55	4.68188	2.95294	5.13789	3.24615
UK055	UK055_265	NA	240	4920	19	0.0719697	NA	NA	40.1284	2.98917	0.0513	9.71886	NA	NA	0.176265	10.1682	0.02492	2.98917	0.021111	NA	NA	NA	NA	NA	158.676	4.68519	5.12932	164.842	15.4727	16.2095	NA	NA	NA	44.4028	NA		158.676	4.68519	2.95269	5.1416	3.23047
UK055	UK055_55	NA	261	5400	15.6	0.065	NA	NA	40.1284	3.0003	0.0498	9.49201	NA	NA	0.171111	9.9549	0.02492	3.0003	-0.041485	NA	NA	NA	NA	NA	158.676	4.70264	5.1375	160.383	14.7699	15.1572	NA	NA	NA	82.7775	NA		158.676	4.70264	2.96368	5.15749	3.24679
UK055	UK055_155	NA	199	4420	14.4	0.0699029	NA	NA	40.1123	3.05491	0.0465	10.0946	NA	NA	0.159837	10.5467	0.02493	3.05491	-0.18596	NA	NA	NA	NA	NA	158.739	4.79011	6.74133	150.56	14.759	31.9563	NA	NA	NA	31.5402	NA		158.739	4.79011	3.01761	5.23771	3.32287
UK055	UK055_166	NA	367	7050	32.6	0.0674948	NA	NA	40.0481	2.96261	0.0555	9.03244	NA	NA	0.191079	9.5059	0.02497	2.96261	0.042896	NA	NA	NA	NA	NA	158.99	4.65264	5.28543	177.549	15.4856	18.1706	NA	NA	NA	2.11551	NA		158.99	4.65264	2.92637	5.11367	3.18999
UK055	UK055_173	NA	390	7650	60.6	0.0683973	NA	NA	40.016	2.95273	0.0521	8.86586	NA	NA	0.179517	9.34463	0.02499	2.95273	0.083834	NA	NA	NA	NA	NA	159.116	4.64075	5.15693	167.645	14.4418	15.6574	NA	NA	NA	25.0589	NA		159.116	4.64075	2.91658	5.10354	3.19515
UK055	UK055_228	NA	245	5120	26.8	0.067	NA	NA	39.9361	2.98784	0.0494	9.97236	NA	NA	0.170554	10.4103	0.02504	2.98784	0.02834	NA	NA	NA	NA	NA	159.43	4.7051	5.0788	159.9	15.4028	12.7584	NA	NA	NA	95.3144	NA		159.43	4.7051	2.9512	5.16384	3.23818
UK055	UK055_44	NA	411	9040	51.1	0.0650127	NA	NA	39.7614	3.0388	0.0509	8.85673	NA	NA	0.176505	9.36354	0.02515	3.0388	-0.063688	NA	NA	NA	NA	NA	160.122	4.80585	5.12667	165.049	14.2647	13.9373	NA	NA	NA	52.1425	NA		160.122	4.80585	3.00137	5.2595	3.27298
UK055	UK055_110	NA	600	12640	7.6	0.0737864	NA	NA	39.7141	2.91692	0.0492	8.11822	NA	NA	0.170813	8.62636	0.02518	2.91692	0.20327	NA	NA	NA	NA	NA	160.311	4.61848	5.21932	160.125	12.7795	15.0354	NA	NA	NA	97.6571	NA		160.311	4.61848	2.88095	5.0899	3.17523
UK055	UK055_79	NA	224	4559	24.6	0.0673973	NA	NA	39.7141	2.98631	0.0512	9.62835	NA	NA	0.177757	10.0808	0.02518	2.98631	0.070201	NA	NA	NA	NA	NA	160.311	4.72834	5.19264	166.129	15.4501	15.5951	NA	NA	NA	46.3579	NA		160.311	4.72834	2.94948	5.18979	3.22935
UK055	UK055_125	NA	373	8210	50.1	0.0668	NA	NA	39.6825	2.94185	0.048	9.37344	NA	NA	0.16678	9.82425	0.0252	2.94185	-0.090933	NA	NA	NA	NA	NA	160.437	4.66155	5.29304	156.62	14.2598	15.4961	NA	NA	NA	61.9637	NA		160.437	4.66155	2.90554	5.1297	3.20631
UK055	UK055_54	NA	144	2660	8.2	0.0807882	NA	NA	39.6825	3.09042	0.0563	10.9987	NA	NA	0.195619	11.4247	0.0252	3.09042	-0.07912	NA	NA	NA	NA	NA	160.437	4.89697	5.2697	181.412	18.982	15.7982	NA	NA	NA	3.7336	NA		160.437	4.89697	3.05228	5.34454	3.29812
UK055	UK055_19	NA	82	1885	6.7	0.0680203	NA	NA	39.6825	3.13332	0.045	13.8654	NA	NA	0.156356	14.2151	0.0252	3.13332	-0.028926	NA	NA	NA	NA	NA	160.437	4.96495	5.24839	147.508	19.5189	14.9045	NA	NA	NA	19.9755	NA		160.437	4.96495	3.09465	5.40689	3.38863
UK055	UK055_93	NA	222	4600	28.2	0.0760108	NA	NA	39.6511	2.98058	0.0481	10.0919	NA	NA	0.16726	10.5228	0.02522	2.98058	-0.098863	NA	NA	NA	NA	NA	160.562	4.72658	5.25992	157.038	15.3116	15.0385	NA	NA	NA	66.8135	NA		160.562	4.72658	2.94377	5.18955	3.23988
UK055	UK055_221	NA	372	7870	42	0.0691928	NA	NA	39.604	2.96999	0.0512	8.56314	NA	NA	0.178251	9.06357	0.02525	2.96999	0.16178	NA	NA	NA	NA	NA	160.751	4.71525	5.67796	166.555	13.9236	20.2489	NA	NA	NA	40.683	NA		160.751	4.71525	2.93326	5.18026	3.21571
UK055	UK055_69	NA	380	6960	54.3	0.0720159	NA	NA	39.5883	2.96	0.0552	9.04725	NA	NA	0.192253	9.51916	0.02526	2.96	0.1227	NA	NA	NA	NA	NA	160.814	4.70121	5.41811	178.55	15.5872	22.0474	NA	NA	NA	2.51392	NA		160.814	4.70121	2.92339	5.16783	3.1955
UK055	UK055_99	NA	254	5100	39.1	0.0721402	NA	NA	39.557	3.05574	0.0537	9.48676	NA	NA	0.187177	9.96676	0.02528	3.05574	0.12985	NA	NA	NA	NA	NA	160.94	4.85702	5.27091	174.218	15.9572	15.1902	NA	NA	NA	10.0286	NA		160.94	4.85702	3.01792	5.31064	3.28594
UK055	UK055_10	NA	94	2094	7	0.0739958	NA	NA	39.5257	3.06842	0.0463	12.3278	NA	NA	0.161511	12.7039	0.0253	3.06842	0.032128	NA	NA	NA	NA	NA	161.065	4.88093	5.22849	152.025	17.9387	14.2777	NA	NA	NA	32.4874	NA		161.065	4.88093	3.03041	5.33318	3.32287
UK055	UK055_179	NA	277	5470	21.9	0.0793478	NA	NA	39.4945	3.00677	0.0539	9.55079	NA	NA	0.188171	10.0129	0.02532	3.00677	-0.059597	NA	NA	NA	NA	NA	161.191	4.78655	5.25891	175.068	16.1028	16.9911	NA	NA	NA	10.5905	NA		161.191	4.78655	2.96949	5.24762	3.22967
UK055	UK055_232	NA	281	6480	36.5	0.0719921	NA	NA	39.4789	2.99004	0.0462	9.5371	NA	NA	0.161354	9.99483	0.02533	2.99004	-0.078126	NA	NA	NA	NA	NA	161.254	4.76175	5.29006	151.887	14.1009	14.9013	NA	NA	NA	21.7073	NA		161.254	4.76175	2.95295	5.22536	3.26348
UK055	UK055_46	NA	196	3880	15.2	0.0703704	NA	NA	39.4789	3.02408	0.0533	10.2931	NA	NA	0.18615	10.7281	0.02533	3.02408	-0.2	NA	NA	NA	NA	NA	161.254	4.81596	5.32088	173.339	17.0969	16.1011	NA	NA	NA	19.7418	NA		161.254	4.81596	2.98657	5.2748	3.24371
UK055	UK055_112	NA	238	4580	20.3	0.0787738	NA	NA	39.4789	3.06791	0.0533	9.7634	NA	NA	0.18615	10.2341	0.02533	3.06791	-0.123	NA	NA	NA	NA	NA	161.254	4.88577	5.14379	173.339	16.3095	15.7378	NA	NA	NA	17.144	NA		161.254	4.88577	3.02986	5.33861	3.2842
UK055	UK055_95	NA	118	2380	9	0.0869565	NA	NA	39.4633	3.16025	0.0507	11.7474	NA	NA	0.17714	12.1651	0.02534	3.16025	-0.065922	NA	NA	NA	NA	NA	161.317	5.03476	5.20962	165.596	18.5901	15.3336	NA	NA	NA	66.2507	NA		161.317	5.03476	3.12104	5.47562	3.38697
UK055	UK055_271	NA	588	12960	83.8	0.0731878	NA	NA	39.4166	2.91588	0.048	8.09663	NA	NA	0.167905	8.60569	0.02537	2.91588	0.086156	NA	NA	NA	NA	NA	161.505	4.65081	5.17057	157.599	12.563	13.6997	NA	NA	NA	54.7666	NA		161.505	4.65081	2.87966	5.12585	3.18138
UK055	UK055_192	NA	237	5380	19.2	0.0732824	NA	NA	39.3856	3.02923	0.0435	9.74158	NA	NA	0.152284	10.2017	0.02539	3.02923	0.13305	NA	NA	NA	NA	NA	161.631	4.83531	5.35169	143.926	13.6906	17.1933	NA	NA	NA	1.02672	NA		161.631	4.83531	2.99157	5.2945	3.30386
UK055	UK055_133	NA	111	2211	6.74	0.0705759	NA	NA	39.3856	3.17448	0.0544	11.6647	NA	NA	0.190442	12.0889	0.02539	3.17448	-0.041789	NA	NA	NA	NA	NA	161.631	5.06716	5.35095	177.006	19.6393	16.8416	NA	NA	NA	13.5852	NA		161.631	5.06716	3.13501	5.50705	3.38468
UK055	UK055_77	NA	136	2730	15.8	0.0666667	NA	NA	39.3856	3.1823	0.0525	11.514	NA	NA	0.183791	11.9456	0.02539	3.1823	0.12364	NA	NA	NA	NA	NA	161.631	5.07964	5.308	171.317	18.8338	18.135	NA	NA	NA	30.7213	NA		161.631	5.07964	3.14273	5.51853	3.40645
UK055	UK055_42	NA	131	2650	9.5	0.0883721	NA	NA	39.3856	3.19019	0.0507	11.4871	NA	NA	0.177489	11.9219	0.02539	3.19019	-0.28777	NA	NA	NA	NA	NA	161.631	5.09224	5.38384	165.898	18.2489	17.6703	NA	NA	NA	67.4815	NA		161.631	5.09224	3.15053	5.53013	3.40999
UK055	UK055_266	NA	70	1470	3.81	0.0782341	NA	NA	39.3236	3.1357	0.046	13.7289	NA	NA	0.161289	14.0824	0.02543	3.1357	-0.011569	NA	NA	NA	NA	NA	161.883	5.01295	5.46807	151.831	19.8622	14.8605	NA	NA	NA	32.5582	NA		161.883	5.01295	3.09666	5.45852	3.38516
UK055	UK055_186	NA	185	3660	8.12	0.0647012	NA	NA	39.3082	3.03457	0.0541	9.98032	NA	NA	0.189765	10.4315	0.02544	3.03457	0.1763	NA	NA	NA	NA	NA	161.945	4.85313	5.31503	176.429	16.8955	17.1388	NA	NA	NA	8.5543	NA		161.945	4.85313	2.99677	5.31246	3.27129
UK055	UK055_164	NA	342	6830	41.7	0.0734155	NA	NA	39.2927	3.0284	0.0487	8.83775	NA	NA	0.170891	9.34222	0.02545	3.0284	0.17381	NA	NA	NA	NA	NA	162.008	4.84512	7.14953	160.192	13.8455	26.1282	NA	NA	NA	79.2893	NA		162.008	4.84512	2.99066	5.30548	3.27709
UK055	UK055_56	NA	249	5550	16.4	0.0735426	NA	NA	39.2311	2.98829	0.0467	9.58477	NA	NA	0.16413	10.0398	0.02549	2.98829	0.024188	NA	NA	NA	NA	NA	162.26	4.78827	5.52728	154.312	14.3738	19.2071	NA	NA	NA	28.8982	NA		162.26	4.78827	2.95099	5.25498	3.25376
UK055	UK055_38	NA	46	837	3.5	0.0847458	NA	NA	39.2157	3.75499	0.049	17.9944	NA	NA	0.172281	18.3821	0.0255	3.75499	-0.046197	NA	NA	NA	NA	NA	162.323	6.01911	5.35207	161.397	27.4369	15.3936	NA	NA	NA	94.7899	NA		162.323	6.01911	3.70811	6.39691	3.94209
UK055	UK055_102	NA	142	2680	10.1	0.0731884	NA	NA	39.1696	3.17881	0.0467	11.4763	NA	NA	0.164388	11.9084	0.02553	3.17881	-0.18858	NA	NA	NA	NA	NA	162.511	5.10136	5.47593	154.536	17.0724	20.518	NA	NA	NA	39.2678	NA		162.511	5.10136	3.13908	5.54306	3.43142
UK055	UK055_196	NA	148	3060	12.1	0.0695402	NA	NA	39.0778	3.03849	0.052	10.9697	NA	NA	0.183474	11.3828	0.02559	3.03849	0.023622	NA	NA	NA	NA	NA	162.888	4.88735	5.55762	171.046	17.92	18.9905	NA	NA	NA	37.8519	NA		162.888	4.88735	3.00043	5.34877	3.27333
UK055	UK055_107	NA	181	3670	13.5	0.0678392	NA	NA	39.0472	3.01454	0.0506	9.98969	NA	NA	0.178674	10.4346	0.02561	3.01454	0.16512	NA	NA	NA	NA	NA	163.014	4.85252	5.39203	166.919	16.0624	15.5904	NA	NA	NA	62.5929	NA		163.014	4.85252	2.97675	5.31764	3.25885
UK055	UK055_177	NA	200	4400	12.9	0.0732538	NA	NA	38.9864	3.10265	0.0465	10.3916	NA	NA	0.164453	10.8449	0.02565	3.10265	0.029795	NA	NA	NA	NA	NA	163.265	5.00194	5.28486	154.593	15.5528	14.9646	NA	NA	NA	28.2443	NA		163.265	5.00194	3.06369	5.45566	3.35721
UK055	UK055_208	NA	234	5040	7.5	0.0728155	NA	NA	38.8651	2.99636	0.0478	9.51447	NA	NA	0.169578	9.97513	0.02573	2.99636	0.082047	NA	NA	NA	NA	NA	163.768	4.84529	5.47225	159.052	14.6865	16.1524	NA	NA	NA	53.0924	NA		163.768	4.84529	2.95862	5.31512	3.25283
UK055	UK055_240	NA	199	3780	13.7	0.0811131	NA	NA	38.85	3.03633	0.0565	10.0006	NA	NA	0.20052	10.4514	0.02574	3.03633	0.22485	NA	NA	NA	NA	NA	163.831	4.91178	5.52339	185.566	17.727	24.0524	NA	NA	NA	1.28701	NA		163.831	4.91178	2.99807	5.37614	3.2757
UK055	UK055_275	NA	475	10370	59	0.0728395	NA	NA	38.835	2.94664	0.0482	8.50142	NA	NA	0.17113	8.9976	0.02575	2.94664	0.087189	NA	NA	NA	NA	NA	163.894	4.7685	5.28688	160.399	13.3506	14.9864	NA	NA	NA	61.1436	NA		163.894	4.7685	2.9095	5.24591	3.20702
UK055	UK055_60	NA	66	1327	5.22	0.0790909	NA	NA	38.8199	3.32278	0.05	14.0664	NA	NA	0.177589	14.4535	0.02576	3.32278	-0.062008	NA	NA	NA	NA	NA	163.957	5.37924	5.4171	165.984	22.1359	16.0963	NA	NA	NA	86.0776	NA		163.957	5.37924	3.28089	5.80696	3.53879
UK055	UK055_30	NA	40.2	768	2.69	0.0871961	NA	NA	38.7597	3.85075	0.062	15.2353	NA	NA	0.220553	15.7144	0.0258	3.85075	0.023463	NA	NA	NA	NA	NA	164.208	6.2434	5.57252	202.37	28.8403	22.5298	NA	NA	NA	1.0612	NA		164.208	6.2434	3.80212	6.61657	3.99402
UK055	UK055_35	NA	26.2	481	1.54	0.105697	NA	NA	38.7597	3.96926	0.06	18.7208	NA	NA	0.213438	19.137	0.0258	3.96926	-0.0283	NA	NA	NA	NA	NA	164.208	6.43555	5.43227	196.434	34.1919	17.8977	NA	NA	NA	6.92363	NA		164.208	6.43555	3.91914	6.79819	4.10978
UK055	UK055_65	NA	256	5240	22.3	0.0775113	NA	NA	38.6997	3.05327	0.051	9.71269	NA	NA	0.181704	10.1813	0.02584	3.05327	-0.0032744	NA	NA	NA	NA	NA	164.46	4.95788	5.46206	169.526	15.8973	17.4741	NA	NA	NA	54.4072	NA		164.46	4.95788	3.01465	5.42163	3.28764
UK055	UK055_16	NA	238	4640	15.4	0.0816543	NA	NA	38.625	3.06511	0.0517	9.51005	NA	NA	0.184554	9.99179	0.02589	3.06511	-0.18392	NA	NA	NA	NA	NA	164.774	4.9865	5.408	171.972	15.808	16.7143	NA	NA	NA	41.0018	NA		164.774	4.9865	3.02627	5.44949	3.28875
UK055	UK055_262	NA	627	13670	23.8	0.0693069	NA	NA	38.5951	2.92847	0.0481	7.93998	NA	NA	0.171836	8.46282	0.02591	2.92847	0.1536	NA	NA	NA	NA	NA	164.899	4.7678	5.61698	161.011	12.6013	18.1696	NA	NA	NA	54.1846	NA		164.899	4.7678	2.89134	5.2508	3.19052
UK055	UK055_199	NA	283	5930	30.5	0.072619	NA	NA	38.4615	2.97781	0.0482	9.4383	NA	NA	0.172791	9.89691	0.026	2.97781	-0.16859	NA	NA	NA	NA	NA	165.465	4.86454	5.64775	161.838	14.8068	18.0434	NA	NA	NA	65.6798	NA		165.465	4.86454	2.93992	5.34187	3.23794
UK055	UK055_168	NA	95	2030	8.5	0.0746924	NA	NA	38.4172	3.23738	0.0466	13.0334	NA	NA	0.167248	13.4294	0.02603	3.23738	0.031058	NA	NA	NA	NA	NA	165.653	5.29452	5.41324	157.028	19.5407	16.5788	NA	NA	NA	38.8592	NA		165.653	5.29452	3.19614	5.73714	3.47461
UK055	UK055_190	NA	42	732	3.07	0.0702517	NA	NA	38.3142	3.6109	0.061	15.3181	NA	NA	0.219519	15.738	0.0261	3.6109	0.1157	NA	NA	NA	NA	NA	166.093	5.92086	5.68084	201.509	28.7725	22.0026	NA	NA	NA	1.51875	NA		166.093	5.92086	3.56478	6.32179	3.79248
UK055	UK055_293	NA	172	3680	13.9	0.0830346	NA	NA	38.2702	3.06125	0.0507	9.91789	NA	NA	0.182662	10.3796	0.02613	3.06125	0.1774	NA	NA	NA	NA	NA	166.282	5.02521	5.67001	170.349	16.2793	18.8572	NA	NA	NA	61.5403	NA		166.282	5.02521	3.02211	5.49292	3.3001
UK055	UK055_151	NA	165	3390	14.8	0.0813634	NA	NA	38.2702	3.08047	0.0527	10.6305	NA	NA	0.189868	11.0678	0.02613	3.08047	0.086563	NA	NA	NA	NA	NA	166.282	5.05676	5.57007	176.516	17.9345	19.8765	NA	NA	NA	26.3023	NA		166.282	5.05676	3.04108	5.5218	3.31005
UK055	UK055_261	NA	99	1920	6.83	0.0729701	NA	NA	38.2702	3.2185	0.0489	12.2489	NA	NA	0.176177	12.6646	0.02613	3.2185	0.057075	NA	NA	NA	NA	NA	166.282	5.28334	5.55216	164.766	19.2642	17.3026	NA	NA	NA	87.748	NA		166.282	5.28334	3.17734	5.73002	3.44777
UK055	UK055_101	NA	41	803	3.01	0.073236	NA	NA	38.1679	3.50375	0.05	15.1546	NA	NA	0.180623	15.5544	0.0262	3.50375	0.016902	NA	NA	NA	NA	NA	166.721	5.76661	5.51798	168.596	24.1672	17.7192	NA	NA	NA	87.9656	NA		166.721	5.76661	3.45883	6.18053	3.705
UK055	UK055_66	NA	129	2780	12.1	0.0737805	NA	NA	38.1534	3.11255	0.0491	11.7484	NA	NA	0.177439	12.1537	0.02621	3.11255	0.32403	NA	NA	NA	NA	NA	166.784	5.12466	5.58709	165.855	18.5994	19.5452	NA	NA	NA	91.5917	NA		166.784	5.12466	3.07263	5.58668	3.34937
UK055	UK055_92	NA	328	6610	15.6	0.0687225	NA	NA	38.1243	3.06595	0.0519	9.39465	NA	NA	0.187701	9.88228	0.02623	3.06595	-0.13897	NA	NA	NA	NA	NA	166.91	5.0517	5.55015	174.666	15.8592	17.9054	NA	NA	NA	37.129	NA		166.91	5.0517	3.0266	5.5205	3.28888
UK055	UK055_200	NA	78	1557	5.07	0.0762406	NA	NA	38.1098	3.21556	0.049	12.4772	NA	NA	0.177281	12.8849	0.02624	3.21556	0.14686	NA	NA	NA	NA	NA	166.973	5.30017	5.6472	165.718	19.7037	18.4515	NA	NA	NA	89.8237	NA		166.973	5.30017	3.17428	5.74906	3.44397
UK055	UK055_193	NA	112	2058	10.5	0.0808314	NA	NA	38.0228	3.31341	0.058	12.1476	NA	NA	0.210322	12.5914	0.0263	3.31341	0.0069401	NA	NA	NA	NA	NA	167.35	5.47362	5.53495	193.823	22.2207	16.1665	NA	NA	NA	2.19679	NA		167.35	5.47362	3.27077	5.91122	3.50244
UK055	UK055_235	NA	480	9770	47.7	0.0764423	NA	NA	37.9939	2.94676	0.052	8.75437	NA	NA	0.188708	9.23701	0.02632	2.94676	0.33889	NA	NA	NA	NA	NA	167.475	4.87154	5.48834	175.526	14.8904	17.948	NA	NA	NA	25.2293	NA		167.475	4.87154	2.90881	5.35922	3.20082
UK055	UK055_130	NA	306	6740	40	0.0826446	NA	NA	37.9363	2.93375	0.0491	9.28306	NA	NA	0.178455	9.73561	0.02636	2.93375	-0.12169	NA	NA	NA	NA	NA	167.726	4.85721	5.62627	166.73	14.9706	21.3438	NA	NA	NA	90.2601	NA		167.726	4.85721	2.89591	5.34758	3.1906
UK055	UK055_255	NA	44	1115	6.25	0.0811688	NA	NA	37.9075	3.2684	0.043	15.5935	NA	NA	0.156403	15.9323	0.02638	3.2684	-0.10408	NA	NA	NA	NA	NA	167.852	5.41527	5.78343	147.55	21.8832	17.5421	NA	NA	NA	7.6022	NA		167.852	5.41527	3.22622	5.85976	3.52505
UK055	UK055_215	NA	34	880	4.47	0.0773356	NA	NA	37.8788	3.49475	0.044	18.7643	NA	NA	0.160161	19.0869	0.0264	3.49475	0.029818	NA	NA	NA	NA	NA	167.978	5.79457	5.81659	150.844	26.7612	18.9694	NA	NA	NA	20.4309	NA		167.978	5.79457	3.44961	6.21257	3.71366
UK055	UK055_216	NA	84	1654	4.04	0.0821138	NA	NA	37.8358	3.1951	0.0525	12.6145	NA	NA	0.191319	13.0129	0.02643	3.1951	0.1361	NA	NA	NA	NA	NA	168.166	5.30359	5.55742	177.754	21.2224	19.1581	NA	NA	NA	36.6958	NA		168.166	5.30359	3.15378	5.75831	3.41874
UK055	UK055_169	NA	148	3340	14.2	0.0788889	NA	NA	37.7644	3.10066	0.0476	10.8186	NA	NA	0.173791	11.2542	0.02648	3.10066	0.015913	NA	NA	NA	NA	NA	168.48	5.15631	5.80029	162.703	16.9208	19.5324	NA	NA	NA	51.0729	NA		168.48	5.15631	3.06049	5.62461	3.34784
UK055	UK055_143	NA	182	3750	14.7	0.085168	NA	NA	37.7074	3.03722	0.0516	9.98214	NA	NA	0.188679	10.434	0.02652	3.03722	0.21076	NA	NA	NA	NA	NA	168.731	5.05825	5.77742	175.502	16.8182	21.1452	NA	NA	NA	41.3547	NA		168.731	5.05825	2.99781	5.5362	3.27747
UK055	UK055_83	NA	114	2237	4.23	0.0643836	NA	NA	37.7074	3.14842	0.0539	11.53	NA	NA	0.19709	11.9521	0.02652	3.14842	0.0063998	NA	NA	NA	NA	NA	168.731	5.24345	5.63474	182.661	19.9834	17.2787	NA	NA	NA	17.9396	NA		168.731	5.24345	3.10757	5.7059	3.36446
UK055	UK055_128	NA	120	2270	6.78	0.0792982	NA	NA	37.6648	3.11282	0.0508	12.2753	NA	NA	0.185964	12.6638	0.02655	3.11282	-0.097507	NA	NA	NA	NA	NA	168.92	5.18988	5.98044	173.18	20.1655	23.1669	NA	NA	NA	68.9727	NA		168.92	5.18988	3.07239	5.6577	3.34247
UK055	UK055_13	NA	56	1072	2.34	0.0657303	NA	NA	37.594	3.58536	0.054	14.2929	NA	NA	0.198051	14.7357	0.0266	3.58536	-0.37164	NA	NA	NA	NA	NA	169.234	5.98868	5.60163	183.476	24.7394	18.1831	NA	NA	NA	30.3407	NA		169.234	5.98868	3.5387	6.39981	3.74418
UK055	UK055_256	NA	218	4760	37.5	0.0779626	NA	NA	37.5657	2.98673	0.0484	9.86021	NA	NA	0.177646	10.3026	0.02662	2.98673	-0.03584	NA	NA	NA	NA	NA	169.359	4.99244	5.73613	166.033	15.7817	16.9135	NA	NA	NA	69.0321	NA		169.359	4.99244	2.94784	5.47953	3.24179
UK055	UK055_236	NA	84	1650	6.36	0.0827048	NA	NA	37.4532	3.30047	0.054	12.7896	NA	NA	0.198795	13.2086	0.0267	3.30047	0.14824	NA	NA	NA	NA	NA	169.862	5.53302	6.23721	184.106	22.2443	27.3195	NA	NA	NA	20.0516	NA		169.862	5.53302	3.25737	5.97872	3.5126
UK055	UK055_119	NA	55	1134	4.97	0.0698034	NA	NA	37.4532	3.68415	0.05	14.2419	NA	NA	0.18407	14.7107	0.0267	3.68415	0.069834	NA	NA	NA	NA	NA	169.862	6.17622	5.92899	171.557	23.2244	25.2893	NA	NA	NA	88.5901	NA		169.862	6.17622	3.63603	6.57848	3.8709
UK055	UK055_82	NA	169	3630	19.7	0.0718978	NA	NA	37.2717	3.02164	0.0474	10.8608	NA	NA	0.175348	11.2733	0.02683	3.02164	-0.068399	NA	NA	NA	NA	NA	170.678	5.0896	6.02724	164.049	17.0788	19.2403	NA	NA	NA	46.3964	NA		170.678	5.0896	2.98199	5.57526	3.27894
UK055	UK055_291	NA	335	7240	34.6	0.0831731	NA	NA	37.2301	2.97448	0.0491	9.50886	NA	NA	0.18184	9.96323	0.02686	2.97448	0.15702	NA	NA	NA	NA	NA	170.866	5.01561	5.81725	169.642	15.5666	16.7343	NA	NA	NA	87.5158	NA		170.866	5.01561	2.9354	5.50882	3.22529
UK055	UK055_187	NA	170	3400	12.3	0.0765401	NA	NA	37.2301	3.06837	0.0538	10.8594	NA	NA	0.199246	11.2845	0.02686	3.06837	-0.035803	NA	NA	NA	NA	NA	170.866	5.17394	5.89732	184.488	19.0391	21.528	NA	NA	NA	17.3557	NA		170.866	5.17394	3.02806	5.65335	3.28891
UK055	UK055_234	NA	40	882	3.32	0.116491	NA	NA	37.1747	3.47301	0.054	17.0438	NA	NA	0.200284	17.394	0.0269	3.47301	-0.017027	NA	NA	NA	NA	NA	171.117	5.86474	6.02233	185.367	29.4791	22.5583	NA	NA	NA	34.7584	NA		171.117	5.86474	3.42732	6.29294	3.66525
UK055	UK055_230	NA	55	1061	4.19	0.0744227	NA	NA	37.1747	3.57062	0.061	14.5375	NA	NA	0.226247	14.9695	0.0269	3.57062	-0.27219	NA	NA	NA	NA	NA	171.117	6.02957	5.60231	207.096	28.0514	18.3734	NA	NA	NA	1.90588	NA		171.117	6.02957	3.52365	6.44683	3.69928
UK055	UK055_74	NA	159	3064	17.2	0.0765806	NA	NA	37.092	3.08561	0.0532	10.5933	NA	NA	0.197757	11.0335	0.02696	3.08561	0.016078	NA	NA	NA	NA	NA	171.494	5.22187	5.78261	183.227	18.4993	19.3022	NA	NA	NA	22.2478	NA		171.494	5.22187	3.04493	5.70056	3.30842
UK055	UK055_94	NA	77	1632	7.5	0.0881316	NA	NA	37.0645	3.1181	0.0476	13.4226	NA	NA	0.177072	13.78	0.02698	3.1181	-0.0050413	NA	NA	NA	NA	NA	171.619	5.28066	6.02031	165.538	21.0518	23.8376	NA	NA	NA	57.4604	NA		171.619	5.28066	3.07696	5.75512	3.36066
UK055	UK055_201	NA	57	1359	4.54	0.0837638	NA	NA	36.9004	3.28806	0.044	15.1624	NA	NA	0.164408	15.5149	0.0271	3.28806	0.055886	NA	NA	NA	NA	NA	172.373	5.59261	5.55606	154.554	22.2467	14.6643	NA	NA	NA	11.2445	NA		172.373	5.59261	3.24449	6.04638	3.52556
UK055	UK055_250	NA	35.4	713	1.37	0.0641086	NA	NA	36.9004	3.76808	0.051	16.4167	NA	NA	0.190564	16.8436	0.0271	3.76808	-0.0084869	NA	NA	NA	NA	NA	172.373	6.40907	5.44604	177.11	27.3816	13.8968	NA	NA	NA	73.7106	NA		172.373	6.40907	3.71815	6.80864	3.94418
UK055	UK055_165	NA	26	673	2.27	0.0782759	NA	NA	36.7647	3.98436	0.053	17.6346	NA	NA	0.198768	18.0791	0.0272	3.98436	-0.021367	NA	NA	NA	NA	NA	173	6.80128	6.04016	184.083	30.4472	21.1947	NA	NA	NA	48.1417	NA		173	6.80128	3.93137	7.18171	4.13777
UK055	UK055_147	NA	205	4510	11.1	0.0685185	NA	NA	36.7242	3.15445	0.0476	10.4509	NA	NA	0.178713	10.9166	0.02723	3.15445	0.037111	NA	NA	NA	NA	NA	173.188	5.39042	6.41707	166.952	16.8075	24.0856	NA	NA	NA	47.3834	NA		173.188	5.39042	3.11246	5.86409	3.39636
UK055	UK055_242	NA	60	1060	2.06	0.0757353	NA	NA	36.63	3.55164	0.058	15.4018	NA	NA	0.218319	15.806	0.0273	3.55164	0.082055	NA	NA	NA	NA	NA	173.628	6.08433	5.84892	200.51	28.7673	20.8072	NA	NA	NA	6.62128	NA		173.628	6.08433	3.50424	6.50974	3.7344
UK055	UK055_31	NA	91	2180	6.89	0.083012	NA	NA	36.5898	3.22583	0.0434	12.2333	NA	NA	0.163543	12.6515	0.02733	3.22583	-0.095346	NA	NA	NA	NA	NA	173.816	5.53209	6.4256	153.799	18.0578	27.3493	NA	NA	NA	3.73676	NA		173.816	5.53209	3.18273	5.99776	3.49448
UK055	UK055_248	NA	455	9260	23	0.0734824	NA	NA	36.4964	3.06602	0.0508	8.47294	NA	NA	0.191918	9.01062	0.0274	3.06602	0.1328	NA	NA	NA	NA	NA	174.255	5.27114	5.92035	178.264	14.7328	20.3796	NA	NA	NA	59.2901	NA		174.255	5.27114	3.02495	5.76028	3.29978
UK055	UK055_161	NA	37	845	2.99	0.0793103	NA	NA	36.4964	3.75042	0.048	16.2525	NA	NA	0.18134	16.6796	0.0274	3.75042	-0.0038834	NA	NA	NA	NA	NA	174.255	6.44776	5.8449	169.213	26.0033	17.3361	NA	NA	NA	70.6177	NA		174.255	6.44776	3.70018	6.85343	3.93973
UK055	UK055_76	NA	31.6	674	1.93	0.0762846	NA	NA	36.4964	3.97014	0.045	17.0071	NA	NA	0.170006	17.4643	0.0274	3.97014	0.15758	NA	NA	NA	NA	NA	174.255	6.82552	6.04842	159.424	25.7722	19.3292	NA	NA	NA	24.3239	NA		174.255	6.82552	3.91697	7.20997	4.14819
UK055	UK055_121	NA	253	4790	25.8	0.0793846	NA	NA	36.3636	3.10187	0.0567	9.7183	NA	NA	0.214989	10.2013	0.0275	3.10187	0.044448	NA	NA	NA	NA	NA	174.883	5.35171	5.74255	197.731	18.3306	19.0414	NA	NA	NA	1.6447	NA		174.883	5.35171	3.06017	5.83739	3.30936
UK055	UK055_267	NA	40	791	3.74	0.0840449	NA	NA	36.3636	3.64132	0.053	15.9574	NA	NA	0.20096	16.3676	0.0275	3.64132	0.020533	NA	NA	NA	NA	NA	174.883	6.28244	5.78033	185.938	27.8166	19.3288	NA	NA	NA	43.8259	NA		174.883	6.28244	3.59238	6.701	3.82112
UK055	UK055_3	NA	147	2930	13.5	0.0915254	NA	NA	36.2582	3.06327	0.0507	11.2195	NA	NA	0.192798	11.6301	0.02758	3.06327	0.070311	NA	NA	NA	NA	NA	175.385	5.30007	6.44774	179.014	19.0898	28.684	NA	NA	NA	70.9378	NA		175.385	5.30007	3.02197	5.79274	3.29912
UK055	UK055_138	NA	56	1019	4.6	0.0916335	NA	NA	36.2319	3.44434	0.057	14.475	NA	NA	0.216913	14.8792	0.0276	3.44434	-0.083763	NA	NA	NA	NA	NA	175.51	5.96361	7.02852	199.337	26.9362	34.117	NA	NA	NA	9.28546	NA		175.51	5.96361	3.39788	6.40605	3.62014
UK055	UK055_231	NA	222	4580	13.5	0.0671642	NA	NA	36.2056	3.17429	0.0489	10.0944	NA	NA	0.186223	10.5817	0.02762	3.17429	0.078691	NA	NA	NA	NA	NA	175.635	5.49992	5.77826	173.402	16.8691	16.7569	NA	NA	NA	79.6312	NA		175.635	5.49992	3.13144	5.97743	3.40664
UK055	UK055_131	NA	98	1833	4.31	0.0718333	NA	NA	36.1011	3.27035	0.0537	12.0415	NA	NA	0.205095	12.4777	0.0277	3.27035	0.024133	NA	NA	NA	NA	NA	176.137	5.68233	6.69889	189.428	21.5657	27.3532	NA	NA	NA	23.313	NA		176.137	5.68233	3.22608	6.1482	3.47521
UK055	UK055_132	NA	165	3620	10.6	0.0863192	NA	NA	36.075	3.03247	0.048	10.5837	NA	NA	0.183458	11.0095	0.02772	3.03247	-0.33297	NA	NA	NA	NA	NA	176.263	5.2727	5.84536	171.031	17.331	18.2473	NA	NA	NA	59.5082	NA		176.263	5.2727	2.99139	5.7724	3.28955
UK055	UK055_188	NA	23.1	527	1.44	0.0893855	NA	NA	35.8423	3.93573	0.048	18.1117	NA	NA	0.184649	18.5344	0.0279	3.93573	-0.26686	NA	NA	NA	NA	NA	177.392	6.88647	6.4738	172.053	29.3418	23.6983	NA	NA	NA	73.7067	NA		177.392	6.88647	3.88207	7.28098	4.11687
UK055	UK055_24	NA	186	3410	11.1	0.0956897	NA	NA	35.7654	3.06941	0.0525	10.2548	NA	NA	0.202394	10.7043	0.02796	3.06941	0.23212	NA	NA	NA	NA	NA	177.768	5.38188	6.71812	187.15	18.2972	25.3493	NA	NA	NA	29.4818	NA		177.768	5.38188	3.02748	5.88024	3.30463
UK055	UK055_197	NA	51	1062	4.08	0.0795322	NA	NA	35.7143	3.42882	0.047	14.7529	NA	NA	0.18145	15.1461	0.028	3.42882	0.15805	NA	NA	NA	NA	NA	178.019	6.02043	7.00698	169.308	23.6239	28.7897	NA	NA	NA	45.5375	NA		178.019	6.02043	3.38191	6.471	3.63959
UK055	UK055_178	NA	75	1380	4.4	0.0897959	NA	NA	35.5872	3.42503	0.06	13.3343	NA	NA	0.232466	13.7671	0.0281	3.42503	0.13297	NA	NA	NA	NA	NA	178.646	6.03467	6.49348	212.232	26.3727	29.1887	NA	NA	NA	1.17899	NA		178.646	6.03467	3.37801	6.48727	3.61766
UK055	UK055_274	NA	134	2800	14.2	0.078453	NA	NA	35.2858	3.13846	0.0501	10.9518	NA	NA	0.195767	11.3926	0.02834	3.13846	0.22198	NA	NA	NA	NA	NA	180.151	5.57569	6.78242	181.538	18.9406	25.0414	NA	NA	NA	88.0963	NA		180.151	5.57569	3.09502	6.07044	3.36907
UK055	UK055_23	NA	33.1	812	2.4	0.0805369	NA	NA	35.2113	3.695	0.041	17.9371	NA	NA	0.160547	18.3137	0.0284	3.695	0.094406	NA	NA	NA	NA	NA	180.527	6.57793	6.55461	151.182	25.73	19.4798	NA	NA	NA	2.18803	NA		180.527	6.57793	3.64374	7.00392	3.90695
UK055	UK055_43	NA	123	2580	2.06	0.0814229	NA	NA	35.0877	3.24833	0.0452	12.5819	NA	NA	0.177617	12.9945	0.0285	3.24833	0.082737	NA	NA	NA	NA	NA	181.153	5.80256	6.1207	166.008	19.9033	17.6578	NA	NA	NA	13.2384	NA		181.153	5.80256	3.20312	6.28451	3.48673
UK055	UK055_37	NA	281	5860	24.7	0.0794212	NA	NA	34.2466	3.03	0.0534	9.17835	NA	NA	0.214994	9.66556	0.0292	3.03	0.24173	NA	NA	NA	NA	NA	185.539	5.54171	6.94994	197.734	17.368	28.562	NA	NA	NA	15.1405	NA		185.539	5.54171	2.98681	6.06772	3.26502
UK055	UK055_185	NA	109	2220	4.31	0.087247	NA	NA	34.2349	3.1675	0.05	11.94	NA	NA	0.201374	12.353	0.02921	3.1675	-0.23782	NA	NA	NA	NA	NA	185.602	5.79513	6.33976	186.288	21.0276	21.0483	NA	NA	NA	95.2656	NA		185.602	5.79513	3.12234	6.30034	3.39307
UK055	UK055_100	NA	146	3380	13.8	0.0907895	NA	NA	33.8868	3.13549	0.0463	10.8702	NA	NA	0.188387	11.3134	0.02951	3.13549	0.069468	NA	NA	NA	NA	NA	187.481	5.79379	7.25098	175.252	18.2122	23.8325	NA	NA	NA	18.9163	NA		187.481	5.79379	3.09034	6.30883	3.38188
UK055	UK055_149	NA	186	4370	12.2	0.0772152	NA	NA	33.6814	3.11973	0.0445	10.5457	NA	NA	0.182168	10.9975	0.02969	3.11973	-0.16379	NA	NA	NA	NA	NA	188.608	5.79882	6.22735	169.924	17.2091	16.0164	NA	NA	NA	4.81255	NA		188.608	5.79882	3.07454	6.31931	3.39764
UK055	UK055_11	NA	38.7	852	2.93	0.122083	NA	NA	33.2226	3.70467	0.047	15.0265	NA	NA	0.195059	15.4764	0.0301	3.70467	-0.023201	NA	NA	NA	NA	NA	191.174	6.97838	7.68711	180.937	25.6549	26.1937	NA	NA	NA	44.1839	NA		191.174	6.97838	3.65028	7.42802	3.90111
UK055	UK055_71	NA	310	6160	16	0.0893855	NA	NA	32.7547	2.97403	0.0532	9.64483	NA	NA	0.223944	10.0929	0.03053	2.97403	-0.044136	NA	NA	NA	NA	NA	193.865	5.67976	7.41745	205.187	18.7532	30.5727	NA	NA	NA	25.566	NA		193.865	5.67976	2.92976	6.23845	3.20059
UK055	UK055_64	NA	164	3390	11.7	0.078	NA	NA	32.7332	3.06577	0.0519	10.828	NA	NA	0.218615	11.2536	0.03055	3.06577	-0.079364	NA	NA	NA	NA	NA	193.99	5.85867	6.53814	200.756	20.5019	23.2164	NA	NA	NA	53.5142	NA		193.99	5.85867	3.0201	6.40242	3.28984
UK055	UK055_148	NA	121	3030	12.5	0.0827815	NA	NA	32.6584	3.19091	0.0452	11.8311	NA	NA	0.190829	12.2539	0.03062	3.19091	0.095478	NA	NA	NA	NA	NA	194.427	6.11139	7.66674	177.337	19.9413	27.5458	NA	NA	NA	8.96483	NA		194.427	6.11139	3.14327	6.63669	3.43287
UK055	UK055_156	NA	187	3900	12	0.0816327	NA	NA	32.4992	3.04182	0.0493	10.0149	NA	NA	0.209159	10.4666	0.03077	3.04182	0.18434	NA	NA	NA	NA	NA	195.366	5.85352	8.06867	192.846	18.3855	33.7501	NA	NA	NA	78.2075	NA		195.366	5.85352	2.99619	6.405	3.28032
UK055	UK055_144	NA	121	2660	7.4	0.0937896	NA	NA	32.457	3.14878	0.0477	10.9662	NA	NA	0.202634	11.4093	0.03081	3.14878	-0.017435	NA	NA	NA	NA	NA	195.616	6.067	7.68087	187.352	19.5218	28.6838	NA	NA	NA	41.9502	NA		195.616	6.067	3.10149	6.60197	3.38828
UK055	UK055_160	NA	144	2998	8.84	0.0958785	NA	NA	32.4465	3.07835	0.0519	11.0519	NA	NA	0.220547	11.4726	0.03082	3.07835	0.0047345	NA	NA	NA	NA	NA	195.678	5.93315	6.74574	202.365	21.0524	27.366	NA	NA	NA	54.1511	NA		195.678	5.93315	3.0321	6.47951	3.30319
UK055	UK055_28	NA	98	2330	6.4	0.0981595	NA	NA	32.2581	3.8485	0.042	15.9376	NA	NA	0.17952	16.3956	0.031	3.8485	0.08286	NA	NA	NA	NA	NA	196.804	7.45955	7.62584	167.647	25.3428	28.4246	NA	NA	NA	2.21466	NA		196.804	7.45955	3.79035	7.90593	4.05501
UK055	UK055_96	NA	185	3870	8.34	0.0808923	NA	NA	32.2373	3.04897	0.0507	9.92219	NA	NA	0.216846	10.3801	0.03102	3.04897	0.024618	NA	NA	NA	NA	NA	196.929	5.91352	6.37935	199.281	18.7843	18.242	NA	NA	NA	81.0031	NA		196.929	5.91352	3.00287	6.46816	3.28122
UK055	UK055_34	NA	165	3720	14.5	0.0759162	NA	NA	32.0513	3.39949	0.0429	13.0918	NA	NA	0.18455	13.5259	0.0312	3.39949	-0.044901	NA	NA	NA	NA	NA	198.054	6.63046	7.13498	171.968	21.4004	21.5602	NA	NA	NA	2.012	NA		198.054	6.63046	3.3478	7.13498	3.65095
UK055	UK055_182	NA	650	12890	53.1	0.0956757	NA	NA	31.9387	2.90284	0.0521	7.86998	NA	NA	0.224917	8.38827	0.03131	2.90284	0.072741	NA	NA	NA	NA	NA	198.742	5.68113	6.62004	205.994	15.6405	20.7975	NA	NA	NA	37.3378	NA		198.742	5.68113	2.85855	6.2664	3.14194
UK055	UK055_171	NA	60	1285	3.58	0.104678	NA	NA	31.746	3.4688	0.046	15.4771	NA	NA	0.199788	15.8611	0.0315	3.4688	0.12395	NA	NA	NA	NA	NA	199.929	6.82871	8.28238	184.947	26.8243	30.7056	NA	NA	NA	26.0966	NA		199.929	6.82871	3.41556	7.32845	3.67499
UK055	UK055_202	NA	65	1281	2.97	0.0705463	NA	NA	31.0559	3.22863	0.056	14.4636	NA	NA	0.248625	14.8196	0.0322	3.22863	-0.028149	NA	NA	NA	NA	NA	204.303	6.49274	6.95872	225.459	29.9713	21.8474	NA	NA	NA	17.404	NA		204.303	6.49274	3.178	7.03836	3.42775
UK055	UK055_109	NA	108	1978	4.76	0.100211	NA	NA	30.8166	3.14322	0.0562	12.2379	NA	NA	0.25145	12.6351	0.03245	3.14322	0.091001	NA	NA	NA	NA	NA	205.864	6.36852	8.49705	227.754	25.7834	35.8049	NA	NA	NA	9.52889	NA		205.864	6.36852	3.09356	6.93198	3.3543
UK055	UK055_129	NA	226	4570	13.9	0.0926667	NA	NA	30.7598	3.06574	0.0521	9.62414	NA	NA	0.233537	10.1006	0.03251	3.06574	0.19713	NA	NA	NA	NA	NA	206.238	6.22267	7.55603	213.114	19.4194	30.6656	NA	NA	NA	47.489	NA		206.238	6.22267	3.01722	6.80021	3.2929
UK055	UK055_78	NA	87	1820	7.9	0.100509	NA	NA	30.03	3.40868	0.0502	12.8153	NA	NA	0.230488	13.2609	0.0333	3.40868	-0.0011042	NA	NA	NA	NA	NA	211.169	7.08144	6.90137	210.602	25.2269	20.0573	NA	NA	NA	96.5475	NA		211.169	7.08144	3.35345	7.61748	3.608
UK055	UK055_290	NA	49	966	1.66	0.0932584	NA	NA	29.7619	3.39949	0.06	13.7619	NA	NA	0.277966	14.1755	0.0336	3.39949	0.06049	NA	NA	NA	NA	NA	213.04	7.12392	8.72014	249.043	31.317	41.1192	NA	NA	NA	2.53814	NA		213.04	7.12392	3.34393	7.66598	3.5773
UK055	UK055_270	NA	70	1431	3.62	0.098103	NA	NA	29.2398	3.24833	0.049	13.5232	NA	NA	0.231059	13.9078	0.0342	3.24833	-0.028417	NA	NA	NA	NA	NA	216.781	6.92469	7.49984	211.073	26.5114	26.6987	NA	NA	NA	67.8224	NA		216.781	6.92469	3.19432	7.49984	3.46606
UK055	UK055_20	NA	277	5540	13.7	0.105547	NA	NA	29.1545	3.18565	0.055	10.1902	NA	NA	0.260111	10.6765	0.0343	3.18565	0.35257	NA	NA	NA	NA	NA	217.404	6.81026	7.36895	234.756	22.381	26.6522	NA	NA	NA	10.0905	NA		217.404	6.81026	3.13253	7.3975	3.40764
UK055	UK055_163	NA	102	2281	3.92	0.0852174	NA	NA	28.49	3.17114	0.0456	12.1995	NA	NA	0.220685	12.6049	0.0351	3.17114	0.10208	NA	NA	NA	NA	NA	222.389	6.932	8.62007	202.48	23.1427	28.5796	NA	NA	NA	8.69794	NA		222.389	6.932	3.11707	7.535	3.40639
UK055	UK055_47	NA	164	3620	15.2	0.100662	NA	NA	28.4414	3.10101	0.0465	10.5849	NA	NA	0.225426	11.0298	0.03516	3.10101	-0.12409	NA	NA	NA	NA	NA	222.762	6.7899	8.02851	206.415	20.605	24.967	NA	NA	NA	14.3354	NA		222.762	6.7899	3.04805	7.40642	3.35621
UK055	UK055_72	NA	75	1410	3.62	0.119472	NA	NA	28.3286	3.41978	0.058	12.5443	NA	NA	0.282296	13.0021	0.0353	3.41978	0.10231	NA	NA	NA	NA	NA	223.634	7.51667	8.04062	252.477	29.0721	31.9132	NA	NA	NA	5.17262	NA		223.634	7.51667	3.36115	8.08209	3.59653
UK055	UK055_268	NA	280	5370	25	0.100402	NA	NA	28.2167	2.99882	0.0544	9.48059	NA	NA	0.265824	9.94357	0.03544	2.99882	0.16351	NA	NA	NA	NA	NA	224.506	6.61663	7.83071	239.349	21.2059	24.4252	NA	NA	NA	16.3278	NA		224.506	6.61663	2.9472	7.25723	3.22296
UK055	UK055_252	NA	144	2900	7.3	0.0945596	NA	NA	28.169	3.28181	0.0491	10.8467	NA	NA	0.240332	11.3323	0.0355	3.28181	0.065582	NA	NA	NA	NA	NA	224.879	7.25287	9.01422	218.692	22.2993	32.4326	NA	NA	NA	58.9425	NA		224.879	7.25287	3.22523	7.84352	3.49559
UK055	UK055_9	NA	77	1468	3.61	0.138526	NA	NA	27.4725	3.38837	0.0525	12.8632	NA	NA	0.263489	13.302	0.0364	3.38837	0.011885	NA	NA	NA	NA	NA	230.48	7.67154	8.32509	237.474	28.1739	27.7609	NA	NA	NA	63.1783	NA		230.48	7.67154	3.32851	8.25898	3.57624
UK055	UK055_220	NA	220	4640	13.2	0.108642	NA	NA	27.4424	3.03481	0.0507	9.96136	NA	NA	0.254734	10.4134	0.03644	3.03481	0.21063	NA	NA	NA	NA	NA	230.729	6.87835	8.09646	230.415	21.4695	31.2181	NA	NA	NA	97.6284	NA		230.729	6.87835	2.98114	7.52925	3.26341
UK055	UK055_194	NA	55	1328	5	0.125	NA	NA	26.9542	3.30688	0.047	14.6806	NA	NA	0.240421	15.0485	0.0371	3.30688	-0.10823	NA	NA	NA	NA	NA	234.832	7.62587	8.41212	218.765	29.6243	26.3867	NA	NA	NA	30.2485	NA		234.832	7.62587	3.24737	8.23786	3.52856
UK055	UK055_80	NA	97	2080	4.29	0.10916	NA	NA	25.7069	3.21312	0.0479	11.6415	NA	NA	0.256913	12.0768	0.0389	3.21312	-0.015402	NA	NA	NA	NA	NA	246.011	7.75572	8.41353	232.176	25.0698	25.3044	NA	NA	NA	29.0995	NA		246.011	7.75572	3.15259	8.41353	3.43786
UK055	UK055_85	NA	900	15900	30.3	0.130603	NA	NA	20.0682	2.95576	0.0574	7.602	NA	NA	0.39437	8.1564	0.04983	2.95576	0.095286	NA	NA	NA	NA	NA	313.478	9.04397	9.9441	337.557	23.4278	23.9058	NA	NA	NA	4.95649	NA		313.478	9.04397	2.88504	9.9441	3.14785
UK055	UK055_219	NA	1930	36800	24.2	0.161333	NA	NA	16.835	2.87725	0.0558	6.6168	NA	NA	0.457006	7.2153	0.0594	2.87725	0.13127	NA	NA	NA	NA	NA	371.976	10.3997	11.4893	382.174	22.9836	23.5812	NA	NA	NA	39.6157	NA		371.976	10.3997	2.79581	11.4893	3.07761
UK055	UK055_59	NA	409	8170	43.8	0.184034	NA	NA	15.7978	2.99015	0.0538	8.56886	NA	NA	0.469556	9.07559	0.0633	2.99015	0.2824	NA	NA	NA	NA	NA	395.663	11.4752	12.5923	390.882	29.4529	29.9392	NA	NA	NA	73.599	NA		395.663	11.4752	2.90024	12.5923	3.18435
UK055	UK055_145	NA	279	4840	18.4	0.190083	NA	NA	15.6006	3.00848	0.0574	9.37423	NA	NA	0.507307	9.84516	0.0641	3.00848	0.10809	NA	NA	NA	NA	NA	400.512	11.6827	12.8068	416.637	33.6574	34.1304	NA	NA	NA	35.1766	NA		400.512	11.6827	2.91693	12.8068	3.18769
UK055	UK055_217	NA	402	7230	31.6	0.182659	NA	NA	15.3846	3.13082	0.0578	8.87393	NA	NA	0.518015	9.41003	0.065	3.13082	0.15396	NA	NA	NA	NA	NA	405.962	12.318	12.6533	423.825	32.6164	28.8903	NA	NA	NA	28.3027	NA		405.962	12.318	3.03428	13.4161	3.29324
UK055	UK055_57	NA	890	16480	58.8	0.202062	NA	NA	14.4509	2.91843	0.0562	7.6305	NA	NA	0.536221	8.16956	0.0692	2.91843	0.061243	NA	NA	NA	NA	NA	431.334	12.1763	14.2269	435.93	28.9625	33.876	NA	NA	NA	76.5146	NA		431.334	12.1763	2.82294	13.4179	3.10638
UK055	UK055_14	NA	374	6830	46.2	0.232161	NA	NA	12.7714	3.02545	0.0565	9.01763	NA	NA	0.609974	9.51162	0.0783	3.02545	0.036093	NA	NA	NA	NA	NA	485.968	14.1622	15.5103	483.544	36.6071	37.158	NA	NA	NA	90.0373	NA		485.968	14.1622	2.91423	15.5103	3.19357
UK055	UK055_175	NA	1021	17840	71.7	0.257914	NA	NA	11.1483	2.94247	0.0594	7.5138	NA	NA	0.734649	8.0694	0.0897	2.94247	0.10879	NA	NA	581.788	163.725	165.057	553.763	15.6141	17.1816	559.278	34.7143	35.4381	NA	NA	NA	76.2746	4.81712		553.763	15.6141	2.81964	17.1816	3.09844
UK055	UK055_17	NA	605	10450	48.3	0.261081	NA	NA	10.929	2.9513	0.0609	8.17008	NA	NA	0.768316	8.68679	0.0915	2.9513	-0.061689	NA	NA	635.704	176.528	177.744	564.402	15.9489	17.5408	578.796	38.3421	39.033	NA	NA	NA	49.9378	11.2162		564.402	15.9489	2.8258	17.5408	3.09521
UK055	UK055_40	NA	2680	45300	319	0.288688	NA	NA	10.1802	2.87619	0.061	6.35683	NA	NA	0.826181	6.97723	0.09823	2.87619	-0.046259	NA	NA	639.234	137.056	138.608	604.028	16.5839	18.3227	611.491	32.0619	32.9528	NA	NA	NA	68.5376	5.50759		604.028	16.5839	2.74556	18.3227	3.02519
UK055	UK055_49	NA	163	2660	10	0.352113	NA	NA	9.8912	3.30349	0.0618	10.6526	NA	NA	0.861471	11.1531	0.1011	3.30349	0.24264	NA	NA	667.195	229.593	197.954	620.852	19.5532	19.7136	630.926	52.4559	46.0098	NA	NA	NA	69.5812	6.94593		620.852	19.5532	3.14941	21.1254	3.39994
UK055	UK055_246	NA	287	4790	40.9	0.2788	NA	NA	9.68054	3.04421	0.0618	9.1503	NA	NA	0.880218	9.6434	0.1033	3.04421	0.086903	NA	NA	667.195	196.869	230.529	633.719	18.3739	21.5421	641.1	45.8709	53.6467	NA	NA	NA	75.8509	5.01739		633.719	18.3739	2.89937	20.1024	3.16792
UK055	UK055_245	NA	552	8030	10.6	0.411012	NA	NA	6.04595	2.98225	0.0716	8.15013	NA	NA	1.63286	8.67862	0.1654	2.98225	0.28812	NA	NA	974.592	166.769	167.923	986.716	27.2851	29.9549	982.964	54.7044	55.6929	NA	NA	NA	88.8464	-1.24399		986.716	27.2851	2.76524	29.9549	3.03709
UK055	UK055_2	NA	1083	14700	34	0.480226	NA	NA	5.55247	2.92962	0.0768	7.22797	NA	NA	1.90711	7.79912	0.1801	2.92962	0.31222	NA	NA	1116	144.658	145.927	1067.52	28.8222	31.7399	1083.58	51.9959	53.1567	NA	NA	NA	53.084	4.3441		1067.52	28.8222	2.69992	31.7399	2.96721
UK055	UK055_29	NA	1061	15310	62.9	0.504815	NA	NA	5.43183	2.92609	0.0727	7.29054	NA	NA	1.8454	7.85583	0.1841	2.92609	0.081571	NA	NA	1005.6	148.364	149.644	1089.33	29.3274	32.3031	1061.79	51.7779	52.9174	NA	NA	NA	33.2862	-8.32658		1089.33	29.3274	2.69224	32.3031	2.98279
UK055	UK055_284	NA	508	6260	15.5	0.500646	NA	NA	5.20833	2.99423	0.083	8.33948	NA	NA	2.19726	8.86072	0.192	2.99423	0.19929	NA	NA	1269.22	163.369	123.225	1132.2	31.0908	33.1897	1180.17	61.907	49.3355	NA	NA	NA	13.7145	10.7953		1132.2	31.0908	2.74605	34.1097	2.99574
UK055	UK055_53	NA	1370	17430	104.4	0.498329	NA	NA	5.03271	3.10264	0.0845	7.34856	NA	NA	2.31503	7.9767	0.1987	3.10264	-0.015147	NA	NA	1304.09	143.129	163.636	1168.33	33.1544	35.1027	1216.9	56.6203	64.0022	NA	NA	NA	14.6282	10.41		1168.33	33.1544	2.83775	36.1618	3.06353
UK055	UK055_52	NA	3010	40000	165.7	0.567077	NA	NA	5.02513	2.89674	0.0778	6.227	NA	NA	2.13469	6.8678	0.199	2.89674	0.48154	NA	NA	1141.77	124.061	147.769	1169.95	30.9931	36.2074	1160.1	47.5231	56.3895	NA	NA	NA	64.1351	-2.46769		1169.95	30.9931	2.64911	34.1989	2.92669
UK055	UK055_273	NA	489	6260	33.8	0.591944	NA	NA	4.86381	3.01626	0.0817	8.66704	NA	NA	2.31604	9.17689	0.2056	3.01626	0.028769	NA	NA	1238.33	170.59	171.635	1205.33	33.1597	36.3347	1217.21	65.17	66.2251	NA	NA	NA	74.2987	2.66495		1205.33	33.1597	2.75108	36.3347	3.00867
UK055	UK055_204	NA	1045	12640	23.3	0.565534	NA	NA	4.58295	2.9672	0.0845	7.37568	NA	NA	2.54222	7.95015	0.2182	2.9672	0.14131	NA	NA	1304.09	143.66	144.871	1272.36	34.2614	37.6464	1284.21	57.9982	59.2454	NA	NA	NA	70.7712	2.43329		1272.36	34.2614	2.69275	37.6464	2.95269
UK055	UK055_91	NA	2050	24900	76	0.61439	NA	NA	4.44444	2.89625	0.0872	6.59381	NA	NA	2.70521	7.20185	0.225	2.89625	0.35675	NA	NA	1364.92	127.268	128.607	1308.24	34.2929	37.8411	1329.89	53.4395	54.8362	NA	NA	NA	40.9773	4.15245		1308.24	34.2929	2.6213	37.8411	2.88375
UK055	UK055_87	NA	675	8060	13.2	0.647059	NA	NA	4.2517	3.00017	0.088	7.95493	NA	NA	2.85379	8.50188	0.2352	3.00017	0.28043	NA	NA	1382.48	153.322	104.201	1361.69	36.8272	39.209	1369.81	64.0108	47.3111	NA	NA	NA	80.1007	1.50377		1361.69	36.8272	2.70451	40.3896	2.96319
UK055	UK055_206	NA	9710	112800	24	0.583942	NA	NA	4.20345	2.89436	0.0914	5.33061	NA	NA	2.99807	6.0657	0.2379	2.89436	0.48983	NA	NA	1454.95	101.544	152.907	1375.77	35.8579	40.7642	1407.13	46.217	66.0436	NA	NA	NA	14.2271	5.44209		1375.77	35.8579	2.60639	39.5727	2.86035
UK055	UK055_203	NA	1047	12480	45.5	0.647226	NA	NA	4.05022	2.98085	0.0893	7.30873	NA	NA	3.04	7.89323	0.2469	2.98085	0.30187	NA	NA	1410.6	140.251	103.454	1422.47	38.0499	41.26	1417.72	60.3793	48.1077	NA	NA	NA	87.5828	-0.841232		1410.6	140.251	9.94262	141.454	9.95111
UK055	UK055_259	NA	653	7610	54.6	0.694656	NA	NA	4.06009	3.12335	0.0904	7.92493	NA	NA	3.06997	8.5182	0.2463	3.12335	0.25672	NA	NA	1433.99	151.661	107.476	1419.37	39.7911	40.6669	1425.23	65.331	49.5749	NA	NA	NA	86.1619	1.02009		1433.99	151.661	10.5762	152.77	10.7543
UK055	UK055_142	NA	1870	20700	64.5	0.652174	NA	NA	3.92927	2.89138	0.0951	6.69529	NA	NA	3.3371	7.29294	0.2545	2.89138	0.038444	NA	NA	1530.06	126.366	114.282	1461.64	37.8134	42.2132	1489.78	57.0373	53.6748	NA	NA	NA	40.5259	4.47135		1530.06	126.366	8.25892	127.656	8.68496
UK055	UK055_12	NA	8380	90000	425	0.717905	NA	NA	3.82848	2.96204	0.0983	5.46171	NA	NA	3.5402	6.21321	0.2612	2.96204	0.40828	NA	NA	1592.12	102.167	103.728	1495.98	39.5462	43.4663	1536.25	49.231	50.9518	NA	NA	NA	10.2969	6.03879		1592.12	102.167	6.41705	103.728	6.87788
UK055	UK055_257	NA	1920	19830	105.2	0.728028	NA	NA	3.47464	2.91643	0.0986	6.6499	NA	NA	3.91263	7.26131	0.2878	2.91643	0.17563	NA	NA	1597.81	124.39	109.174	1630.53	42.0163	46.2318	1616.3	58.7875	53.9342	NA	NA	NA	66.4985	-2.04736		1597.81	124.39	7.78504	125.677	7.72873
UK055	UK055_63	NA	2130	22210	86.7	0.721298	NA	NA	3.40252	3.00755	0.1003	6.87694	NA	NA	4.06445	7.50584	0.2939	3.00755	0.15366	NA	NA	1629.65	128.126	110.186	1660.99	44.0389	46.9323	1647.2	61.2386	54.8948	NA	NA	NA	69.1305	-1.92285		1629.65	128.126	7.86216	129.366	7.80915
UK055	UK055_213	NA	4090	42700	118.1	0.729012	NA	NA	3.48311	2.8794	0.1027	5.96856	NA	NA	4.06542	6.62682	0.2871	2.8794	0.26343	NA	NA	1673.48	110.513	123.267	1627.02	41.4045	47.1243	1647.39	54.0549	60.5208	NA	NA	NA	48.9962	2.77636		1673.48	110.513	6.6038	111.93	6.85209
UK055	UK055_229	NA	4730	46300	138	0.722513	NA	NA	3.29489	2.90643	0.1055	5.83978	NA	NA	4.41481	6.52306	0.3035	2.90643	0.35021	NA	NA	1723.05	107.444	111.229	1708.64	43.6247	47.7409	1715.12	54.0531	56.6059	NA	NA	NA	81.8124	0.835977		1723.05	107.444	6.23569	108.881	6.36425
UK055	UK055_33	NA	812	7890	17.1	0.850746	NA	NA	3.24359	3.00691	0.1055	7.72714	NA	NA	4.48464	8.29157	0.3083	3.00691	0.24555	NA	NA	1723.05	142.347	114.599	1732.34	45.6786	48.7773	1728.13	68.9466	58.2338	NA	NA	NA	90.7793	-0.539183		1723.05	142.347	8.26134	143.44	8.2852
UK055	UK055_212	NA	2390	23400	57.8	0.781081	NA	NA	3.16456	2.92265	0.1081	6.42552	NA	NA	4.70993	7.05898	0.316	2.92265	0.3212	NA	NA	1767.64	117.604	115.82	1770.16	45.2412	50.2628	1769.01	59.1898	59.6424	NA	NA	NA	97.0104	-0.14289		1767.64	117.604	6.65316	118.906	6.7186
UK055	UK055_159	NA	3040	29200	87.2	0.73093	NA	NA	3.19898	2.95258	0.1099	6.25567	NA	NA	4.73683	6.91745	0.3126	2.95258	0.25797	NA	NA	1797.75	114.057	120.137	1753.49	45.3297	50.1784	1773.78	58.0584	61.7308	NA	NA	NA	52.6033	2.46193		1797.75	114.057	6.34446	115.389	6.55539
UK055	UK055_32	NA	2390	22570	49.2	0.80261	NA	NA	3.20102	2.91798	0.1118	6.44137	NA	NA	4.81564	7.07148	0.3124	2.91798	0.14299	NA	NA	1828.88	117.009	122.569	1752.51	44.7767	50.4422	1787.63	59.5242	63.1774	NA	NA	NA	31.3038	4.17606		1828.88	117.009	6.39783	118.298	6.70591
UK055	UK055_195	NA	5550	50700	108.5	0.756625	NA	NA	2.96648	2.91071	0.1137	5.76042	NA	NA	5.2847	6.45404	0.3371	2.91071	0.38465	NA	NA	1859.38	104.21	120.122	1872.7	47.3064	52.4321	1866.39	55.16	63.0851	NA	NA	NA	82.5142	-0.716783		1859.38	104.21	5.60458	105.643	5.64844
UK055	UK055_90	NA	1256	11460	29.9	0.842254	NA	NA	3.12402	2.94774	0.1163	7.12442	NA	NA	5.13295	7.71016	0.3201	2.94774	0.22963	NA	NA	1900.11	128.363	117.283	1790.22	46.078	50.2655	1841.58	65.6138	61.7962	NA	NA	NA	15.2816	5.78364		1900.11	128.363	6.75557	129.522	7.17994
UK055	UK055_26	NA	3420	31000	314	0.904899	NA	NA	2.94985	2.91276	0.1175	6.15331	NA	NA	5.49211	6.80789	0.339	2.91276	0.31191	NA	NA	1918.54	110.555	116.743	1881.86	47.539	52.5514	1899.36	58.5432	62.359	NA	NA	NA	57.8593	1.91221		1918.54	110.555	5.76243	111.888	5.92655
UK055	UK055_48	NA	729	6590	191.2	0.901887	NA	NA	2.96296	3.1057	0.1183	7.74236	NA	NA	5.50503	8.34204	0.3375	3.1057	0.2313	NA	NA	1930.7	139.05	121.027	1874.63	50.5204	52.6958	1901.38	71.8018	64.3715	NA	NA	NA	49.3194	2.90426		1930.7	139.05	7.20204	140.114	7.44489
UK055	UK055_180	NA	1884	16920	131.9	0.775882	NA	NA	3.1837	2.94419	0.1191	6.67526	NA	NA	5.158	7.29571	0.3141	2.94419	0.20659	NA	NA	1942.77	119.627	120.403	1760.85	45.3661	49.5268	1845.71	62.127	63.4244	NA	NA	NA	1.57351	9.36368		1942.77	119.627	6.15754	120.855	6.77091
UK055	UK055_244	NA	2175	18260	50.4	0.936803	NA	NA	2.72554	2.9295	0.1245	6.56717	NA	NA	6.29823	7.19095	0.3669	2.9295	0.39827	NA	NA	2021.7	116.601	120.099	2014.8	50.6911	55.2248	2018.21	63.0922	65.6221	NA	NA	NA	91.4139	0.341329		2021.7	116.601	5.7675	117.838	5.84542
UK055	UK055_15	NA	2770	23000	144	0.888889	NA	NA	2.74348	2.97603	0.1264	6.51789	NA	NA	6.35252	7.16517	0.3645	2.97603	0.31398	NA	NA	2048.49	115.367	122.928	2003.47	51.2493	56.7789	2025.73	62.9393	67.5298	NA	NA	NA	51.1258	2.19797		2048.49	115.367	5.63178	116.608	5.79804
UK055	UK055_127	NA	2040	15070	57.5	1.00524	NA	NA	2.3872	2.99665	0.1432	6.67794	NA	NA	8.27094	7.31948	0.4189	2.99665	0.33711	NA	NA	2266.26	115.39	124.251	2255.48	57.0326	61.7149	2261.14	66.3987	71.5536	NA	NA	NA	87.4238	0.475604		2266.26	115.39	5.09166	116.574	5.16346
UK055	UK055_123	NA	6890	49300	169.7	1.04047	NA	NA	2.3912	2.89203	0.1461	5.54302	NA	NA	8.42433	6.25211	0.4182	2.89203	0.34274	NA	NA	2300.77	95.3676	134.404	2252.3	54.9766	64.3842	2277.8	56.806	77.342	NA	NA	NA	42.7382	2.10665		2300.77	95.3676	4.14502	96.7821	4.27447
UK055	UK055_247	NA	2120	12610	65.1	1.09781	NA	NA	2.10482	2.98566	0.1738	6.58538	NA	NA	11.3851	7.23059	0.4751	2.98566	0.33217	NA	NA	2594.58	110.035	123.223	2505.89	61.992	67.9539	2555.2	67.5899	75.417	NA	NA	NA	19.1438	3.41828		2594.58	110.035	4.24098	111.195	4.40122
UK055	UK055_136	NA	3940	22800	135	1.41807	NA	NA	1.84877	2.9314	0.1834	5.98146	NA	NA	13.6778	6.66116	0.5409	2.9314	0.52656	NA	NA	2683.86	99.0626	129.091	2787.21	66.3363	74.5997	2727.66	63.1093	80.1703	NA	NA	NA	5.77136	-3.85101		2683.86	99.0626	3.69105	100.326	3.64479
UK055	UK055_181	NA	9540	52100	200	1.3245	NA	NA	1.92567	2.93639	0.1908	5.31242	NA	NA	13.6615	6.06994	0.5193	2.93639	0.49752	NA	NA	2749.07	87.4203	131.56	2696.21	64.7024	74.9867	2726.53	57.4907	82.281	NA	NA	NA	32.5094	1.92279		2749.07	87.4203	3.18	88.8306	3.27239
UK055	UK055_4	NA	68	1710	4.94	0.0662198	NA	NA	53.135	3.65897	0.0369	14.8033	NA	NA	0.0957519	15.2488	0.01882	3.65897	0.068311	NA	NA	NA	NA	NA	120.194	4.35711	4.64469	92.8474	13.5309	13.6104	NA	NA	NA	0.00712842	121.317
UK055	UK055_22	NA	37.6	853	1.85	0.0872642	NA	NA	36.9004	3.46462	0.04	16.3759	NA	NA	0.149462	16.7384	0.0271	3.46462	0.065439	NA	NA	NA	NA	NA	172.373	5.89292	6.32518	141.437	22.1029	22.2108	NA	NA	NA	0.529955	149.115
UK055	UK055_27	NA	89	1612	4.16	0.0744186	NA	NA	38.4763	3.28032	0.06	13.1718	NA	NA	0.21501	13.5741	0.02599	3.28032	0.1644	NA	NA	NA	NA	NA	165.402	5.3567	5.79331	197.748	24.3952	24.5761	NA	NA	NA	0.820816	72.5962
UK055	UK055_36	NA	149	2600	11.73	0.0558571	NA	NA	58.9623	3.10321	0.0598	11.1426	NA	NA	0.139839	11.5667	0.01696	3.10321	0.058365	NA	NA	NA	NA	NA	108.414	3.3362	3.63871	132.9	14.4096	14.5565	NA	NA	NA	0.0908694	81.8202
UK055	UK055_41	NA	200	3610	12.2	0.0871429	NA	NA	32.1854	3.15011	0.0647	10.2046	NA	NA	0.27717	10.6798	0.03107	3.15011	0.12578	NA	NA	NA	NA	NA	197.242	6.11923	6.65836	248.41	23.5379	23.8192	NA	NA	NA	0.00220561	74.2032
UK055	UK055_58	NA	70	1212	2.36	0.0631016	NA	NA	52.1376	3.37532	0.064	13.4945	NA	NA	0.16925	13.9102	0.01918	3.37532	0.071257	NA	NA	NA	NA	NA	122.471	4.09479	4.41068	158.768	20.4477	20.5921	NA	NA	NA	0.0518586	83.4862
UK055	UK055_68	NA	10690	56500	202	1.29737	NA	NA	1.99641	2.91573	0.1966	5.24253	NA	NA	13.578	5.9988	0.5009	2.91573	0.68791	NA	NA	2798.18	85.8807	87.3029	2617.66	62.7305	69.139	2720.73	56.7917	58.9198	NA	NA	NA	0.00155453	6.45114
UK055	UK055_81	NA	63	989	2.72	0.0866242	NA	NA	37.7358	3.69538	0.063	15.2036	NA	NA	0.230191	15.6462	0.0265	3.69538	-0.12204	NA	NA	NA	NA	NA	168.606	6.14985	6.54803	210.356	29.7357	29.9018	NA	NA	NA	0.83327	76.1934
UK055	UK055_88	NA	26.8	695	1.92	0.0964824	NA	NA	38.3142	3.83074	0.034	21.587	NA	NA	0.122355	21.9243	0.0261	3.83074	-0.087534	NA	NA	NA	NA	NA	166.093	6.28133	6.66059	117.205	24.2733	24.3424	NA	NA	NA	0.00968104	121.025
UK055	UK055_89	NA	67	1070	1.96	0.0588589	NA	NA	57.971	3.77691	0.06	14.4739	NA	NA	0.142706	14.9585	0.01725	3.77691	0.033892	NA	NA	NA	NA	NA	110.252	4.12873	4.38497	135.451	18.9704	19.0863	NA	NA	NA	0.974273	81.7334
UK055	UK055_97	NA	87	1482	6.41	0.0798257	NA	NA	36.9004	3.37348	0.063	12.4549	NA	NA	0.235403	12.9037	0.0271	3.37348	-0.039274	NA	NA	NA	NA	NA	172.373	5.7379	6.18102	214.649	24.9709	25.1757	NA	NA	NA	0.131445	75.6615
UK055	UK055_98	NA	135	2330	5.63	0.0879687	NA	NA	34.153	3.15941	0.0637	11.3747	NA	NA	0.257165	11.8054	0.02928	3.15941	-0.10269	NA	NA	NA	NA	NA	186.04	5.79377	6.30135	232.38	24.5252	24.7653	NA	NA	NA	0.0420732	74.5737
UK055	UK055_104	NA	56	738	2.91	0.104676	NA	NA	34.3643	3.75735	0.088	14.8101	NA	NA	0.353083	15.2793	0.0291	3.75735	-0.13185	NA	NA	NA	NA	NA	184.913	6.84913	7.27851	307.037	40.5058	40.7431	NA	NA	NA	3.47942e-06	86.6246
UK055	UK055_106	NA	110	1910	8.8	0.0871287	NA	NA	39.7141	3.25389	0.0609	11.7591	NA	NA	0.211434	12.201	0.02518	3.25389	-0.15393	NA	NA	NA	NA	NA	160.311	5.15201	5.57852	194.755	21.6255	21.8237	NA	NA	NA	0.313149	74.7822
UK055	UK055_113	NA	4300	41000	242	0.707602	NA	NA	3.85951	3.05219	0.1108	5.88054	NA	NA	3.9583	6.62545	0.2591	3.05219	0.77621	NA	NA	1812.58	106.999	108.411	1485.24	40.4895	44.2795	1625.69	53.756	55.4123	NA	NA	NA	3.13806e-12	18.0594
UK055	UK055_122	NA	34.8	571	2.09	0.0800766	NA	NA	43.1034	3.78814	0.063	16.8088	NA	NA	0.201525	17.2304	0.0232	3.78814	0.26148	NA	NA	NA	NA	NA	147.848	5.53697	5.87863	186.416	29.3524	29.4876	NA	NA	NA	0.773956	79.1243
UK055	UK055_126	NA	49	547	1.26	0.0666667	NA	NA	55.5556	3.94125	0.104	14.9927	NA	NA	0.258111	15.5021	0.018	3.94125	-0.19663	NA	NA	NA	NA	NA	115.004	4.49239	4.74904	233.144	32.3039	32.4877	NA	NA	NA	2.14761e-09	93.2219
UK055	UK055_137	NA	269	4500	19.5	0.083691	NA	NA	36.1925	3.09957	0.0628	9.46945	NA	NA	0.239244	9.96383	0.02763	3.09957	0.31369	NA	NA	NA	NA	NA	175.698	5.37234	5.86058	217.802	19.5341	19.8021	NA	NA	NA	0.000893411	74.9527
UK055	UK055_152	NA	59	1414	2.84	0.0791086	NA	NA	54.0249	3.26063	0.04	15.1311	NA	NA	0.102086	15.4784	0.01851	3.26063	0.04743	NA	NA	NA	NA	NA	118.232	3.81998	4.13496	98.7004	14.5592	14.6423	NA	NA	NA	0.80767	133.688
UK055	UK055_154	NA	87	2220	6.59	0.0768961	NA	NA	34.7222	3.31734	0.0417	12.9499	NA	NA	0.165588	13.368	0.0288	3.31734	0.0023396	NA	NA	NA	NA	NA	183.034	5.98645	6.46396	155.583	19.2857	19.4331	NA	NA	NA	0.593132	174.822
UK055	UK055_162	NA	59	1640	5.51	0.0871835	NA	NA	36.1011	3.53338	0.0379	13.8216	NA	NA	0.144751	14.2661	0.0277	3.53338	0.20152	NA	NA	NA	NA	NA	176.137	6.13934	6.5729	137.266	18.3186	18.4416	NA	NA	NA	0.00125001	135.783
UK055	UK055_172	NA	52	810	2.08	0.0722222	NA	NA	54.3478	3.41727	0.068	14.7738	NA	NA	0.172515	15.1639	0.0184	3.41727	-0.0074833	NA	NA	NA	NA	NA	117.536	3.98013	4.27995	161.6	22.6581	22.7928	NA	NA	NA	0.017719	86.4676
UK055	UK055_174	NA	181	3190	18.8	0.0447619	NA	NA	59.8802	3.20315	0.058	11.0324	NA	NA	0.133551	11.488	0.0167	3.20315	-0.15938	NA	NA	NA	NA	NA	106.766	3.39171	3.68111	127.283	13.7437	13.8857	NA	NA	NA	0.554345	79.8464
UK055	UK055_184	NA	183	3090	16.5	0.0699153	NA	NA	40.4367	3.15151	0.066	11.5332	NA	NA	0.225045	11.956	0.02473	3.15151	-0.21614	NA	NA	NA	NA	NA	157.481	4.90288	5.33448	206.1	22.3051	22.518	NA	NA	NA	0.00642615	80.4706
UK055	UK055_198	NA	214	4280	5.58	0.0840361	NA	NA	38.9105	3.06824	0.0575	9.84941	NA	NA	0.203752	10.3162	0.0257	3.06824	0.024904	NA	NA	NA	NA	NA	163.58	4.95588	5.41513	188.296	17.7321	17.9591	NA	NA	NA	0.749226	67.9734
UK055	UK055_209	NA	33.2	904	2.14	0.0633136	NA	NA	59.3472	3.47048	0.036	16.587	NA	NA	0.083638	16.9461	0.01685	3.47048	0.070883	NA	NA	NA	NA	NA	107.717	3.70724	3.97829	81.5595	13.2814	13.3447	NA	NA	NA	0.00921703	117.073
UK055	UK055_211	NA	56	820	2.6	0.0766962	NA	NA	59.5238	4.27256	0.079	14.8702	NA	NA	0.182994	15.4718	0.0168	4.27256	0.062795	NA	NA	NA	NA	NA	107.4	4.55072	4.77285	170.634	24.3058	24.4446	NA	NA	NA	5.08217e-05	90.8372
UK055	UK055_218	NA	196	4890	15.6	0.0579926	NA	NA	40.4204	3.01416	0.0426	10.0287	NA	NA	0.145315	10.4719	0.02474	3.01416	0.13964	NA	NA	NA	NA	NA	157.543	4.69106	5.14082	137.767	13.4917	13.6593	NA	NA	NA	0.347832	182.512
UK055	UK055_223	NA	66	715	3.16	0.1264	NA	NA	38.1679	3.60569	0.089	13.8651	NA	NA	0.321509	14.3263	0.0262	3.60569	0.31669	NA	NA	NA	NA	NA	166.721	5.93439	6.33736	283.062	35.4049	35.6407	NA	NA	NA	1.12237e-08	88.1266
UK055	UK055_227	NA	204	5050	21.2	0.0751773	NA	NA	37.3692	3.02819	0.0421	10.6455	NA	NA	0.155335	11.0678	0.02676	3.02819	-0.087926	NA	NA	NA	NA	NA	170.238	5.08766	5.57113	146.612	15.1107	15.2788	NA	NA	NA	0.356878	177.188
UK055	UK055_233	NA	59	982	2.36	0.0708709	NA	NA	38.4615	3.51294	0.062	14.8679	NA	NA	0.222263	15.2773	0.026	3.51294	0.15005	NA	NA	NA	NA	NA	165.465	5.73872	6.14855	203.791	28.2157	28.381	NA	NA	NA	0.705254	75.4543
UK055	UK055_237	NA	129	2224	9.7	0.0729872	NA	NA	37.9939	3.22932	0.0612	11.627	NA	NA	0.222095	12.0671	0.02632	3.22932	0.10146	NA	NA	NA	NA	NA	167.475	5.33866	5.78712	203.652	22.2708	22.4796	NA	NA	NA	0.146457	74.0859
UK055	UK055_238	NA	45	811	2.36	0.0469185	NA	NA	54.1419	3.64088	0.068	14.9144	NA	NA	0.173172	15.3524	0.01847	3.64088	-0.14019	NA	NA	NA	NA	NA	117.979	4.25641	4.54006	162.168	23.0142	23.1477	NA	NA	NA	0.0300755	86.4166
UK055	UK055_251	NA	683	13160	37.4	0.0486346	NA	NA	62.6566	2.95951	0.055	7.91561	NA	NA	0.121031	8.45077	0.01596	2.95951	0.12063	NA	NA	NA	NA	NA	102.072	2.99705	3.29462	116.006	9.2644	9.44054	NA	NA	NA	0.316634	75.2386
UK055	UK055_258	NA	193	3110	13.3	0.083125	NA	NA	37.7644	3.06197	0.0693	10.6066	NA	NA	0.253019	11.0397	0.02648	3.06197	0.11301	NA	NA	NA	NA	NA	168.48	5.09198	5.5657	229.025	22.6389	22.8922	NA	NA	NA	1.98221e-05	81.4384
UK055	UK055_260	NA	49	697	1.92	0.0727273	NA	NA	38.0228	3.93279	0.074	15.0842	NA	NA	0.268342	15.5884	0.0263	3.93279	-0.055366	NA	NA	NA	NA	NA	167.35	6.49681	6.86954	241.367	33.4998	33.6884	NA	NA	NA	0.00324711	83.9314
UK055	UK055_264	NA	1930	17300	77.2	0.845564	NA	NA	3.30907	2.9681	0.1157	6.63099	NA	NA	4.82091	7.26496	0.3022	2.9681	0.41621	NA	NA	1890.81	119.568	120.811	1702.21	44.4039	48.7885	1788.55	61.1683	62.7406	NA	NA	NA	0.41247	9.97468
UK055	UK055_276	NA	562	10570	52.4	0.0909722	NA	NA	29.1036	3.09185	0.058	10.2369	NA	NA	0.274778	10.6937	0.03436	3.09185	0.44114	NA	NA	NA	NA	NA	217.778	6.62091	7.22551	246.507	23.4089	23.6879	NA	NA	NA	0.800213	58.8913
UK055	UK055_279	NA	6050	63200	336	0.648649	NA	NA	3.83877	2.95334	0.1004	5.66057	NA	NA	3.60614	6.38468	0.2605	2.95334	0.66853	NA	NA	1631.51	105.358	106.858	1492.4	39.3461	43.2684	1550.89	50.7969	52.48	NA	NA	NA	0.269921	8.52622
UK055	UK055_280	NA	30.2	462	1.44	0.0702439	NA	NA	50	4.06318	0.073	17.4749	NA	NA	0.201305	17.941	0.02	4.06318	0.037554	NA	NA	NA	NA	NA	127.656	5.13587	5.41239	186.23	30.5358	30.6656	NA	NA	NA	0.0211899	87.4101
UK055	UK055_282	NA	81	1490	7.9	0.079397	NA	NA	42.9185	3.43034	0.061	12.6868	NA	NA	0.195969	13.1423	0.0233	3.43034	0.058978	NA	NA	NA	NA	NA	148.478	5.03511	5.41161	181.71	21.8694	22.0423	NA	NA	NA	0.311737	76.7725
UK055	UK055_283	NA	99	1766	9.45	0.0786844	NA	NA	38.9105	3.42743	0.063	12.3281	NA	NA	0.223242	12.7956	0.0257	3.42743	-0.069256	NA	NA	NA	NA	NA	163.58	5.53605	5.95069	204.604	23.7156	23.9134	NA	NA	NA	0.110982	76.903
UK055	UK055_287	NA	47	1050	2.78	0.141117	NA	NA	30.03	3.48418	0.036	17.2276	NA	NA	0.165291	17.5764	0.0333	3.48418	0.14036	NA	NA	NA	NA	NA	211.169	7.2383	7.76351	155.324	25.32	25.4321	NA	NA	NA	0.000614537	133.47
UK055	UK055_288	NA	33	472	1.83	0.0701149	NA	NA	52.6316	4.00495	0.078	18.9794	NA	NA	0.204338	19.3973	0.019	4.00495	-0.11962	NA	NA	NA	NA	NA	121.333	4.81388	5.08045	188.79	33.4295	33.5511	NA	NA	NA	0.0138368	89.4206
UK055	UK055_289	NA	75	1125	6.09	0.0980676	NA	NA	38.3142	3.41122	0.075	13.3343	NA	NA	0.2699	13.7637	0.0261	3.41122	-0.13512	NA	NA	NA	NA	NA	166.093	5.59344	6.01623	242.614	29.7114	29.9257	NA	NA	NA	0.000174951	84.4555
University of Calgary, Centre for Pure and Applied Tectonics and Thermochronology
Sunburst Mb ( 47.566978°, -111.103058°)		f206c	207Pb CPS	206Pb CPS	U (ppm)1	U/Th	206Pb/204Pb	1σ %	Data for Tera-Wasserburg plot2				208Pb/206Pb	2σx (%)	Data for Wetherill plot2					208Pb/232Th	2σx (%)	Dates									208Pb/232Th	2σx (ABS)	2σtotal (ABS)	Prob. Conc. (%)	% conc3	Comments	Accepted Dates4
Sample	Spot								238U/206Pb	2σx (%)	207Pb/206Pb	2σx (%)			207Pb/235Pb	2σx (%)	206Pb/238U	2σx (%)	Rho			207Pb/206Pb	2σx (ABS)	2σtotal (ABS)	206Pb/238U	2σx (ABS)	2σtotal (ABS)	207Pb/235Pb	2σx (ABS)	2σtotal (ABS)							Date (Ma)	2σx (ABS)	2σx (%)	2σtotal (ABS)	2σtotal (%)
UK054	UK054_216	NA	248	4800	23.4	0.0659155	NA	NA	46.6636	2.99652	0.0546	10.0431	NA	NA	0.16133	10.4806	0.02143	2.99652	-0.035765	NA	NA	NA	NA	NA	136.687	4.05275	4.44569	151.867	14.7845	14.9679	NA	NA	NA	5.11427	NA		136.687	4.05275	2.96498	4.44569	3.22515
UK054	UK054_7	NA	21.7	401	3.05	0.0824324	NA	NA	43.8596	4.682	0.068	21.2047	NA	NA	0.213769	21.7155	0.0228	4.682	-0.046992	NA	NA	NA	NA	NA	145.328	6.72812	7.00268	196.711	38.8526	38.9655	NA	NA	NA	1.14999	NA		145.328	6.72812	4.62962	7.00268	4.76075
UK054	UK054_115	NA	376	7660	39.8	0.0763916	NA	NA	41.4938	2.94107	0.0505	8.91506	NA	NA	0.167807	9.38766	0.0241	2.94107	0.13145	NA	NA	NA	NA	NA	153.516	4.46167	4.90998	157.514	13.6978	13.9093	NA	NA	NA	56.4033	NA		153.516	4.46167	2.90632	4.90998	3.19323
UK054	UK054_19	NA	647	14470	14.6	0.0519573	NA	NA	40.7997	2.98279	0.0462	9.51476	NA	NA	0.15613	9.97134	0.02451	2.98279	0.19699	NA	NA	NA	NA	NA	156.096	4.60011	5.05005	147.31	13.6738	13.861	NA	NA	NA	19.2598	NA		156.096	4.60011	2.94697	5.05005	3.24416
UK054	UK054_146	NA	284	6240	10.4	0.0722222	NA	NA	40.7	2.97677	0.0474	9.33906	NA	NA	0.160578	9.80201	0.02457	2.97677	0.27474	NA	NA	NA	NA	NA	156.474	4.6018	5.05365	151.209	13.7715	13.9666	NA	NA	NA	42.6161	NA		156.474	4.6018	2.94094	5.05365	3.23211
UK054	UK054_184	NA	246	5320	18.4	0.0770842	NA	NA	40.4531	2.99144	0.0489	9.99675	NA	NA	0.16667	10.4347	0.02472	2.99144	-0.037267	NA	NA	NA	NA	NA	157.418	4.65202	5.10453	156.525	15.1375	15.3269	NA	NA	NA	91.1156	NA		157.418	4.65202	2.95521	5.10453	3.24442
UK054	UK054_197	NA	237	4470	17.6	0.0778761	NA	NA	40.4367	3.05818	0.0535	9.92551	NA	NA	0.182423	10.386	0.02473	3.05818	0.028902	NA	NA	NA	NA	NA	157.481	4.75769	5.20136	170.143	16.2712	16.4767	NA	NA	NA	13.4203	NA		157.481	4.75769	3.02113	5.20136	3.28415
UK054	UK054_79	NA	1058	21010	59.2	0.0830295	NA	NA	39.9042	2.88373	0.051	7.42202	NA	NA	0.176219	7.96256	0.02506	2.88373	-0.092618	NA	NA	NA	NA	NA	159.556	4.54469	5.01881	164.802	12.1134	12.3726	NA	NA	NA	43.1978	NA		159.556	4.54469	2.84833	5.01881	3.13063
UK054	UK054_76	NA	283	6140	20.1	0.0773077	NA	NA	39.557	2.95034	0.0472	9.43812	NA	NA	0.164521	9.88851	0.02528	2.95034	-0.18827	NA	NA	NA	NA	NA	160.94	4.68949	5.15786	154.653	14.1861	14.3836	NA	NA	NA	42.3789	NA		160.94	4.68949	2.91382	5.15786	3.22243
UK054	UK054_223	NA	461	8690	20.3	0.0825203	NA	NA	39.5257	3.06188	0.0535	8.8547	NA	NA	0.186627	9.36914	0.0253	3.06188	-0.02489	NA	NA	NA	NA	NA	161.065	4.87052	5.32366	173.748	14.9631	15.195	NA	NA	NA	11.1323	NA		161.065	4.87052	3.02394	5.32366	3.27941
UK054	UK054_248	NA	264	5600	20.7	0.0780837	NA	NA	39.1083	2.9621	0.0488	9.61017	NA	NA	0.172049	10.0563	0.02557	2.9621	0.05073	NA	NA	NA	NA	NA	162.763	4.76083	5.23274	161.196	14.9902	15.192	NA	NA	NA	83.9597	NA		162.763	4.76083	2.92502	5.23274	3.21741
UK054	UK054_94	NA	87	1920	3.64	0.0726547	NA	NA	38.1971	3.27445	0.0467	11.9617	NA	NA	0.168573	12.4018	0.02618	3.27445	0.060911	NA	NA	NA	NA	NA	166.596	5.38522	5.82566	158.18	18.1675	18.3287	NA	NA	NA	36.4527	NA		166.596	5.38522	3.2325	5.82566	3.50881
UK054	UK054_87	NA	386	7290	31.9	0.0776156	NA	NA	38.0518	2.98007	0.053	9.15588	NA	NA	0.192045	9.62865	0.02628	2.98007	-0.042471	NA	NA	NA	NA	NA	167.224	4.91931	5.40132	178.372	15.7522	15.9834	NA	NA	NA	18.3762	NA		167.224	4.91931	2.94175	5.40132	3.20916
UK054	UK054_249	NA	208	4420	22.4	0.08	NA	NA	37.8788	3.12963	0.051	10.9788	NA	NA	0.185642	11.4162	0.0264	3.12963	0.12172	NA	NA	NA	NA	NA	167.978	5.18917	5.65212	172.904	18.1518	18.3417	NA	NA	NA	59.0334	NA		167.978	5.18917	3.0892	5.65212	3.36028
UK054	UK054_237	NA	56	1354	4.37	0.071875	NA	NA	37.1747	3.38072	0.043	14.6164	NA	NA	0.159486	15.0023	0.0269	3.38072	0.052808	NA	NA	NA	NA	NA	171.117	5.7089	6.14795	150.253	20.9559	21.0832	NA	NA	NA	4.93452	NA		171.117	5.7089	3.33625	6.14795	3.61892
UK054	UK054_247	NA	372	8090	13.7	0.103008	NA	NA	27.3373	3.02922	0.0492	8.93043	NA	NA	0.248148	9.4302	0.03658	3.02922	0.0076746	NA	NA	NA	NA	NA	231.599	6.89112	7.54554	225.07	19.0391	19.3304	NA	NA	NA	51.6866	NA		231.599	6.89112	2.97545	7.54554	3.2686
UK054	UK054_252	NA	491	10070	20.1	0.112291	NA	NA	25.4323	2.91639	0.0526	8.26674	NA	NA	0.285168	8.76609	0.03932	2.91639	0.12029	NA	NA	NA	NA	NA	248.617	7.11259	7.83885	254.749	19.7529	20.1022	NA	NA	NA	54.4202	NA		248.617	7.11259	2.86087	7.83885	3.14663
UK054	UK054_238	NA	445	8660	31	0.118321	NA	NA	24.6609	2.98922	0.0547	8.56293	NA	NA	0.30583	9.06968	0.04055	2.98922	0.25287	NA	NA	NA	NA	NA	256.241	7.50937	8.24087	270.943	21.5715	21.9281	NA	NA	NA	16.3653	NA		256.241	7.50937	2.93059	8.24087	3.20996
UK054	UK054_229	NA	371	7310	26.5	0.115721	NA	NA	24.5761	2.96273	0.053	8.78034	NA	NA	0.297348	9.26672	0.04069	2.96273	0.090889	NA	NA	NA	NA	NA	257.108	7.46752	8.20742	264.327	21.569	21.9106	NA	NA	NA	51.622	NA		257.108	7.46752	2.90442	8.20742	3.1848
UK054	UK054_151	NA	181	3780	22	0.123596	NA	NA	24.2131	3.0444	0.0499	10.4251	NA	NA	0.284153	10.8605	0.0413	3.0444	0.079311	NA	NA	NA	NA	NA	260.886	7.78384	8.51601	253.946	24.4061	24.6882	NA	NA	NA	57.7941	NA		260.886	7.78384	2.98362	8.51601	3.27066
UK054	UK054_174	NA	271	4960	18.3	0.107647	NA	NA	23.9464	3.03646	0.0562	9.51886	NA	NA	0.323592	9.99143	0.04176	3.03646	0.31395	NA	NA	NA	NA	NA	263.733	7.84655	8.58831	284.662	24.8078	25.1462	NA	NA	NA	7.85283	NA		263.733	7.84655	2.97519	8.58831	3.2568
UK054	UK054_185	NA	233	4100	21.2	0.138562	NA	NA	23.8663	3.07786	0.0597	9.97762	NA	NA	0.344897	10.4416	0.0419	3.07786	0.029755	NA	NA	NA	NA	NA	264.599	7.97913	8.71411	300.876	27.1957	27.5356	NA	NA	NA	1.10249	NA		264.599	7.97913	3.01555	8.71411	3.26253
UK054	UK054_21	NA	618	11670	35	0.125899	NA	NA	23.8152	2.92398	0.0531	8.37719	NA	NA	0.307427	8.87282	0.04199	2.92398	0.0053331	NA	NA	NA	NA	NA	265.156	7.59582	8.36758	272.184	21.1875	21.5533	NA	NA	NA	53.265	NA		265.156	7.59582	2.86466	8.36758	3.14641
UK054	UK054_148	NA	426	8360	60.6	0.136795	NA	NA	22.3015	2.98988	0.0544	8.67861	NA	NA	0.33633	9.1792	0.04484	2.98988	0.067653	NA	NA	NA	NA	NA	282.764	8.27158	9.07698	294.387	23.4619	23.8407	NA	NA	NA	34.1814	NA		282.764	8.27158	2.92526	9.07698	3.19803
UK054	UK054_168	NA	621	12990	26.7	0.132178	NA	NA	21.7486	2.92401	0.0493	8.1183	NA	NA	0.312548	8.62883	0.04598	2.92401	0.19157	NA	NA	NA	NA	NA	289.794	8.28595	9.12782	276.154	20.8663	21.247	NA	NA	NA	18.9767	NA		289.794	8.28595	2.85926	9.12782	3.1622
UK054	UK054_118	NA	92	2000	4.86	0.127225	NA	NA	21.0526	3.21863	0.0482	12.2752	NA	NA	0.315676	12.6901	0.0475	3.21863	0.038054	NA	NA	NA	NA	NA	299.155	9.40869	10.2041	278.571	30.926	31.1883	NA	NA	NA	19.4024	NA		299.155	9.40869	3.14509	10.2041	3.42938
UK054	UK054_192	NA	304	5930	53.6	0.148476	NA	NA	19.6078	3.00457	0.0514	9.36213	NA	NA	0.361439	9.83244	0.051	3.00457	-0.17744	NA	NA	NA	NA	NA	320.658	9.39871	10.3053	313.288	26.511	26.8844	NA	NA	NA	61.8216	NA		320.658	9.39871	2.93107	10.3053	3.22504
UK054	UK054_116	NA	336	5520	21.9	0.140927	NA	NA	19.4553	3.37985	0.061	10.9443	NA	NA	0.432309	11.4543	0.0514	3.37985	0.18729	NA	NA	NA	NA	NA	323.111	10.6515	11.4711	364.815	35.1178	35.4831	NA	NA	NA	1.84419	NA		323.111	10.6515	3.29655	11.4711	3.53571
UK054	UK054_239	NA	322	6120	22.3	0.153265	NA	NA	19.2419	2.94268	0.0526	9.2207	NA	NA	0.376912	9.67887	0.05197	2.94268	-0.077532	NA	NA	NA	NA	NA	326.605	9.37154	10.3122	324.763	26.9085	27.2996	NA	NA	NA	89.9435	NA		326.605	9.37154	2.86938	10.3122	3.15964
UK054	UK054_114	NA	249	4860	22.4	0.156643	NA	NA	18.9753	3.02216	0.0511	10.0975	NA	NA	0.371307	10.54	0.0527	3.02216	-0.10858	NA	NA	NA	NA	NA	331.077	9.7531	10.6835	320.621	28.986	29.3416	NA	NA	NA	50.5986	NA		331.077	9.7531	2.94587	10.6835	3.23993
UK054	UK054_145	NA	161	3230	15.7	0.161856	NA	NA	17.0648	3.12673	0.0489	10.8001	NA	NA	0.395101	11.2436	0.0586	3.12673	0.085231	NA	NA	NA	NA	NA	367.106	11.1577	12.1549	338.089	32.3432	32.6922	NA	NA	NA	7.77172	NA		367.106	11.1577	3.03937	12.1549	3.33432
UK054	UK054_1	NA	463	8990	38.5	0.172646	NA	NA	15.7978	3.11622	0.0527	9.17796	NA	NA	0.459955	9.69256	0.0633	3.11622	0.15998	NA	NA	NA	NA	NA	395.663	11.959	13.0347	384.227	31.0156	31.4651	NA	NA	NA	46.4196	NA		395.663	11.959	3.02251	13.0347	3.30268
UK054	UK054_233	NA	971	18160	11.5	0.157104	NA	NA	15.6006	2.96633	0.0565	7.63435	NA	NA	0.499353	8.19038	0.0641	2.96633	0.27363	NA	NA	NA	NA	NA	400.512	11.519	12.6576	411.264	27.7042	28.2649	NA	NA	NA	42.6696	NA		400.512	11.519	2.87606	12.6576	3.15524
UK054	UK054_51	NA	1057	19620	126.1	0.195201	NA	NA	15.3046	2.90088	0.0566	7.44723	NA	NA	0.509914	7.99227	0.06534	2.90088	0.0080191	NA	NA	NA	NA	NA	408.019	11.4694	12.6524	418.391	27.4126	27.9949	NA	NA	NA	48.5399	NA		408.019	11.4694	2.81098	12.6524	3.08953
UK054	UK054_170	NA	629	12040	35.6	0.196685	NA	NA	15.2393	2.92483	0.0548	7.91335	NA	NA	0.495813	8.43657	0.06562	2.92483	0.01046	NA	NA	NA	NA	NA	409.713	11.6106	12.7896	408.864	28.4021	28.9441	NA	NA	NA	95.5677	NA		409.713	11.6106	2.83382	12.7896	3.1225
UK054	UK054_11	NA	304	5290	23.3	0.196293	NA	NA	15.1286	3.021	0.0594	9.47302	NA	NA	0.541364	9.94307	0.0661	3.021	0.11961	NA	NA	NA	NA	NA	412.616	12.0746	13.2273	439.323	35.4741	35.9629	NA	NA	NA	14.3105	NA		412.616	12.0746	2.92635	13.2273	3.19139
UK054	UK054_101	NA	763	14720	46.8	0.183529	NA	NA	14.9768	2.91625	0.0556	7.83346	NA	NA	0.511867	8.35868	0.06677	2.91625	0.10907	NA	NA	NA	NA	NA	416.667	11.7667	12.9683	419.704	28.7427	29.3014	NA	NA	NA	83.8858	NA		416.667	11.7667	2.82401	12.9683	3.10981
UK054	UK054_71	NA	482	7990	37	0.174528	NA	NA	14.9254	3.23215	0.0603	9.58789	NA	NA	0.557049	10.118	0.067	3.23215	0.33298	NA	NA	NA	NA	NA	418.056	13.0834	14.1806	449.604	36.7711	37.2606	NA	NA	NA	7.30698	NA		418.056	13.0834	3.12958	14.1806	3.3908
UK054	UK054_205	NA	1187	22540	88	0.196868	NA	NA	14.7406	2.91694	0.0549	7.46449	NA	NA	0.513522	8.01418	0.06784	2.91694	-0.10385	NA	NA	NA	NA	NA	423.129	11.9461	13.1654	420.815	27.6164	28.1999	NA	NA	NA	88.1987	NA		423.129	11.9461	2.82327	13.1654	3.11455
UK054	UK054_86	NA	1098	20800	65.8	0.199394	NA	NA	14.7124	2.89437	0.0531	7.30645	NA	NA	0.497637	7.85885	0.06797	2.89437	-0.11664	NA	NA	NA	NA	NA	423.914	11.8749	13.1051	410.102	26.5213	27.1037	NA	NA	NA	35.9686	NA		423.914	11.8749	2.80125	13.1051	3.11131
UK054	UK054_196	NA	641	11700	77	0.204244	NA	NA	14.6413	2.97029	0.0585	8.05106	NA	NA	0.550906	8.5815	0.0683	2.97029	-0.12801	NA	NA	NA	NA	NA	425.906	12.2418	13.4488	445.59	30.9614	31.5327	NA	NA	NA	25.9924	NA		425.906	12.2418	2.8743	13.4488	3.13425
UK054	UK054_142	NA	243	4230	17.3	0.181723	NA	NA	14.5773	3.07762	0.0594	9.87365	NA	NA	0.561839	10.3422	0.0686	3.07762	-0.0082741	NA	NA	NA	NA	NA	427.716	12.7363	13.9097	452.723	37.7936	38.2753	NA	NA	NA	21.5296	NA		427.716	12.7363	2.97775	13.9097	3.23299
UK054	UK054_219	NA	322	6130	15.1	0.211189	NA	NA	14.556	3.07698	0.0539	9.13708	NA	NA	0.51056	9.64126	0.0687	3.07698	0.092963	NA	NA	NA	NA	NA	428.319	12.751	13.9262	418.826	33.0999	33.5847	NA	NA	NA	57.8878	NA		428.319	12.751	2.97699	13.9262	3.25902
UK054	UK054_72	NA	507	9710	59.3	0.200338	NA	NA	14.2857	2.94729	0.0537	8.13351	NA	NA	0.518291	8.65104	0.07	2.94729	0.0010642	NA	NA	NA	NA	NA	436.156	12.4295	13.6734	424.009	29.9946	30.5393	NA	NA	NA	45.2088	NA		436.156	12.4295	2.8498	13.6734	3.148
UK054	UK054_39	NA	1019	17620	66.8	0.203659	NA	NA	14.2045	2.91602	0.0595	7.32607	NA	NA	0.577552	7.88508	0.0704	2.91602	0.092746	NA	NA	NA	NA	NA	438.565	12.3634	13.6261	462.887	29.32	29.9597	NA	NA	NA	11.6855	NA		438.565	12.3634	2.81905	13.6261	3.08609
UK054	UK054_246	NA	360	6680	27.1	0.202239	NA	NA	13.7174	3.01003	0.0554	8.81259	NA	NA	0.55685	9.31246	0.0729	3.01003	0.23507	NA	NA	NA	NA	NA	453.604	13.1843	14.4517	449.474	33.8335	34.3645	NA	NA	NA	80.3716	NA		453.604	13.1843	2.90657	14.4517	3.1878
UK054	UK054_15	NA	170	2570	9.1	0.250689	NA	NA	12.7226	3.1314	0.0636	10.7144	NA	NA	0.689257	11.1626	0.0786	3.1314	0.0092375	NA	NA	NA	NA	NA	487.761	14.7102	16.0212	532.354	46.2786	46.7856	NA	NA	NA	7.03894	NA		487.761	14.7102	3.01587	16.0212	3.25939
UK054	UK054_13	NA	383	7080	32.3	0.229893	NA	NA	12.285	2.97834	0.0555	8.75035	NA	NA	0.6229	9.24333	0.0814	2.97834	-0.042032	NA	NA	432.421	195.869	197.048	504.474	14.4521	15.8698	491.664	36.0385	36.6126	NA	NA	NA	51.3338	-16.6626		504.474	14.4521	2.86479	15.8698	3.1579
UK054	UK054_70	NA	323	5760	22.8	0.262673	NA	NA	12.0919	3.00739	0.0578	9.11549	NA	NA	0.659075	9.59878	0.0827	3.00739	0.12053	NA	NA	522.189	200.973	202.088	512.219	14.8083	16.2342	514.048	38.7369	39.3095	NA	NA	NA	92.6727	1.90934		512.219	14.8083	2.89102	16.2342	3.16832
UK054	UK054_182	NA	820	15270	20.5	0.249089	NA	NA	11.9048	2.89546	0.0552	7.63906	NA	NA	0.639322	8.16939	0.084	2.89546	0.015902	NA	NA	420.333	171.164	172.512	519.954	14.464	15.9613	501.886	32.361	33.0194	NA	NA	NA	30.1979	-23.7006		519.954	14.464	2.78177	15.9613	3.08754
UK054	UK054_2	NA	717	12150	56.6	0.25507	NA	NA	11.7647	2.96762	0.0584	7.86878	NA	NA	0.684436	8.40979	0.085	2.96762	0.25912	NA	NA	544.801	172.597	173.878	525.898	14.9871	16.4673	529.452	34.7106	35.3774	NA	NA	NA	83.4866	3.46958		525.898	14.9871	2.8498	16.4673	3.12966
UK054	UK054_234	NA	251	4290	23	0.267131	NA	NA	11.1483	3.01512	0.0595	9.37828	NA	NA	0.735886	9.85105	0.0897	3.01512	0.13884	NA	NA	585.44	204.61	205.683	553.763	15.9996	17.5327	560.002	42.4282	43.024	NA	NA	NA	77.3216	5.41085		553.763	15.9996	2.88926	17.5327	3.16304
UK054	UK054_88	NA	393	7030	35.5	0.266917	NA	NA	11.0132	3.01117	0.0572	8.68361	NA	NA	0.716116	9.19087	0.0908	3.01117	0.084769	NA	NA	499.252	192.118	193.292	560.267	16.1583	17.7104	548.371	38.9616	39.5893	NA	NA	NA	55.8802	-12.2211		560.267	16.1583	2.88403	17.7104	3.16957
UK054	UK054_124	NA	1240	20090	67.1	0.270565	NA	NA	10.846	3.02226	0.0634	7.17943	NA	NA	0.805975	7.78963	0.0922	3.02226	0.085378	NA	NA	721.676	152.798	154.158	568.535	16.4467	18.0155	600.193	35.3127	36.1022	NA	NA	NA	9.62682	21.2201		568.535	16.4467	2.89282	18.0155	3.14257
UK054	UK054_53	NA	2980	51300	12.1	0.229602	NA	NA	10.6895	2.88142	0.0599	6.26264	NA	NA	0.772631	6.89372	0.09355	2.88142	0.070493	NA	NA	599.964	135.906	137.491	576.498	15.8903	17.5505	581.271	30.5188	31.3872	NA	NA	NA	77.5313	3.91123		576.498	15.8903	2.75634	17.5505	3.03943
UK054	UK054_17	NA	1410	23910	46.7	0.243992	NA	NA	10.5932	3.11923	0.0657	8.13788	NA	NA	0.855143	8.7152	0.0944	3.11923	0.49713	NA	NA	796.832	171.243	172.431	581.507	17.3445	18.9018	627.468	40.8134	41.5441	NA	NA	NA	1.15592	27.0227		581.507	17.3445	2.98269	18.9018	3.26339
UK054	UK054_41	NA	1056	18800	197	0.257516	NA	NA	10.5708	2.9219	0.0586	7.32501	NA	NA	0.764346	7.88627	0.0946	2.9219	0.12858	NA	NA	552.267	160.386	161.757	582.685	16.2787	17.935	576.514	34.7038	35.461	NA	NA	NA	73.3841	-5.5078		582.685	16.2787	2.79375	17.935	3.08277
UK054	UK054_129	NA	420	7640	35.8	0.275173	NA	NA	10.4058	2.96645	0.0562	8.81246	NA	NA	0.744665	9.29835	0.0961	2.96645	0.074048	NA	NA	460.278	196.316	197.481	591.513	16.766	18.4232	565.124	40.3193	40.9541	NA	NA	NA	20.9662	-28.512		591.513	16.766	2.83443	18.4232	3.13313
UK054	UK054_163	NA	244	4380	20.9	0.271077	NA	NA	10.4058	3.07383	0.06	9.52307	NA	NA	0.795016	10.0069	0.0961	3.07383	0.10918	NA	NA	603.575	207.167	208.222	591.513	17.3729	18.9772	594.013	45.0319	45.6449	NA	NA	NA	91.4323	1.99839		591.513	17.3729	2.93703	18.9772	3.20689
UK054	UK054_217	NA	1294	20500	22.5	0.271084	NA	NA	10.3199	3.03691	0.0643	7.22008	NA	NA	0.859085	7.83278	0.0969	3.03691	0.34311	NA	NA	751.514	152.923	154.268	596.216	17.2945	18.9289	629.623	36.7682	37.5814	NA	NA	NA	5.87008	20.6647		596.216	17.2945	2.90071	18.9289	3.16449
UK054	UK054_126	NA	513	9630	37.1	0.273599	NA	NA	10.3093	3.22566	0.0544	9.96033	NA	NA	0.727565	10.4696	0.097	3.22566	-0.37964	NA	NA	387.646	225.032	226.081	596.804	18.3867	19.9346	555.123	44.8002	45.3577	NA	NA	NA	12.1342	-53.956		596.804	18.3867	3.08086	19.9346	3.39339
UK054	UK054_201	NA	811	13760	54.7	0.265534	NA	NA	10.2775	2.89903	0.0608	7.7205	NA	NA	0.815676	8.24685	0.0973	2.89903	0.097369	NA	NA	632.166	166.842	168.128	598.566	16.5714	18.2828	605.633	37.6353	38.387	NA	NA	NA	72.1867	5.31499		598.566	16.5714	2.76851	18.2828	3.04958
UK054	UK054_73	NA	123	1950	8.7	0.29	NA	NA	10.01	3.29112	0.0669	10.9863	NA	NA	0.921495	11.4686	0.0999	3.29112	0.11556	NA	NA	834.662	230.498	231.382	613.823	19.2697	20.8304	663.15	55.9027	56.4835	NA	NA	NA	8.96684	26.4585		613.823	19.2697	3.13929	20.8304	3.37462
UK054	UK054_172	NA	758	12840	31.1	0.304008	NA	NA	9.8912	2.96724	0.0596	7.70106	NA	NA	0.830804	8.25293	0.1011	2.96724	0.17668	NA	NA	589.083	167.628	168.926	620.852	17.5629	19.298	614.058	38.045	38.8038	NA	NA	NA	72.666	-5.39289		620.852	17.5629	2.82884	19.298	3.11263
UK054	UK054_204	NA	558	9820	41.9	0.303623	NA	NA	9.74659	2.9638	0.0595	8.27282	NA	NA	0.841716	8.7877	0.1026	2.9638	-0.057152	NA	NA	585.44	180.282	181.494	629.628	17.7786	19.5389	620.092	40.802	41.5207	NA	NA	NA	67.3512	-7.54782		629.628	17.7786	2.82367	19.5389	3.1115
UK054	UK054_221	NA	351	6280	69.8	0.287243	NA	NA	9.68054	3.00071	0.0586	8.91382	NA	NA	0.83464	9.40534	0.1033	3.00071	0.18269	NA	NA	552.267	195.476	196.61	633.719	18.1113	19.8627	616.183	43.4728	44.1421	NA	NA	NA	42.1197	-14.7487		633.719	18.1113	2.85794	19.8627	3.1429
UK054	UK054_198	NA	298	5670	22	0.311174	NA	NA	9.5511	2.94786	0.0553	9.13276	NA	NA	0.798313	9.59672	0.1047	2.94786	0.021973	NA	NA	424.372	204.803	205.936	641.894	18.0106	19.8123	595.876	43.2836	43.9238	NA	NA	NA	4.41614	-51.2572		641.894	18.0106	2.80585	19.8123	3.12007
UK054	UK054_48	NA	495	8190	43	0.314788	NA	NA	9.5057	2.99533	0.0605	8.39182	NA	NA	0.877551	8.91037	0.1052	2.99533	0.16436	NA	NA	621.505	181.79	182.977	644.811	18.3797	20.1631	639.659	42.3114	43.0365	NA	NA	NA	81.1324	-3.75002		644.811	18.3797	2.8504	20.1631	3.12981
UK054	UK054_89	NA	375	6370	17.1	0.309222	NA	NA	9.3633	3.0041	0.0609	8.82215	NA	NA	0.896788	9.3196	0.1068	3.0041	0.12205	NA	NA	635.704	190.741	191.87	654.137	18.6868	20.4899	650.01	44.7692	45.4711	NA	NA	NA	85.8383	-2.89959		654.137	18.6868	2.85672	20.4899	3.13465
UK054	UK054_254	NA	866	13360	72	0.32287	NA	NA	9.19963	2.9306	0.0665	7.82651	NA	NA	0.996672	8.35719	0.1087	2.9306	-0.0004266	NA	NA	822.153	163.977	165.206	665.194	18.5221	20.396	702.119	42.3827	43.2074	NA	NA	NA	11.4829	19.0913		665.194	18.5221	2.78447	20.396	3.04012
UK054	UK054_183	NA	268	4790	24.6	0.304833	NA	NA	9.09091	3.00815	0.0588	9.36771	NA	NA	0.891808	9.83885	0.11	3.00815	0.057768	NA	NA	559.699	205.272	206.351	672.748	19.2172	21.0667	647.34	47.1281	47.7917	NA	NA	NA	30.3222	-20.1982		672.748	19.2172	2.85652	21.0667	3.14712
UK054	UK054_166	NA	1020	18070	23.2	0.310992	NA	NA	9.08265	2.91924	0.0591	7.3724	NA	NA	0.897173	7.92933	0.1101	2.91924	0.13816	NA	NA	570.782	160.924	162.282	673.329	18.6644	20.5666	650.216	38.0925	38.9148	NA	NA	NA	24.4283	-17.966		673.329	18.6644	2.77196	20.5666	3.07148
UK054	UK054_213	NA	674	11400	115	0.334302	NA	NA	8.726	2.99574	0.0638	8.15523	NA	NA	1.00811	8.68805	0.1146	2.99574	0.19929	NA	NA	735.007	173.338	174.537	699.408	19.8559	21.782	707.917	44.3147	45.1132	NA	NA	NA	70.4815	4.8434		699.408	19.8559	2.83896	21.782	3.11029
UK054	UK054_211	NA	759	12810	36.2	0.362	NA	NA	7.74593	2.91351	0.0639	7.7374	NA	NA	1.13744	8.26776	0.1291	2.91351	0.068813	NA	NA	738.322	164.305	165.566	782.729	21.4748	23.6717	771.294	44.7026	45.5913	NA	NA	NA	63.3964	-6.01458		782.729	21.4748	2.74358	23.6717	3.03189
UK054	UK054_260	NA	1530	24900	25.3	0.439236	NA	NA	7.1736	2.95664	0.0651	6.90942	NA	NA	1.25125	7.51544	0.1394	2.95664	0.38809	NA	NA	777.57	145.69	147.089	841.269	23.3187	25.6383	823.97	42.4383	43.4571	NA	NA	NA	38.0085	-8.19203		841.269	23.3187	2.77185	25.6383	3.05433
UK054	UK054_152	NA	1175	17540	136.7	0.42322	NA	NA	6.36943	2.94792	0.0701	7.28051	NA	NA	1.51747	7.85469	0.157	2.94792	0.08493	NA	NA	931.284	149.865	151.162	940.083	25.7871	28.3667	937.455	48.1104	49.1692	NA	NA	NA	92.0316	-0.944909		940.083	25.7871	2.74306	28.3667	3.01918
UK054	UK054_259	NA	371	5540	10.26	0.518182	NA	NA	6.35324	3.00503	0.0705	8.75837	NA	NA	1.53001	9.25955	0.1574	3.00503	0.11445	NA	NA	942.951	180.197	181.279	942.312	26.3446	28.8851	942.503	56.9176	57.8223	NA	NA	NA	99.4893	0.0678057		942.312	26.3446	2.79574	28.8851	3.06525
UK054	UK054_107	NA	1627	23820	40.1	0.512133	NA	NA	6.16143	2.90428	0.0714	6.81855	NA	NA	1.59778	7.41131	0.1623	2.90428	0.18623	NA	NA	968.887	139.491	140.865	969.546	26.1432	28.834	969.344	46.3171	47.4604	NA	NA	NA	99.3398	-0.0679783		969.546	26.1432	2.69644	28.834	2.97409
UK054	UK054_122	NA	1670	24700	79.8	0.440884	NA	NA	6.15764	2.8938	0.0689	6.91721	NA	NA	1.54279	7.49812	0.1624	2.8938	0.30205	NA	NA	895.748	143.138	144.509	970.1	26.0627	28.7637	947.618	46.2252	47.3402	NA	NA	NA	32.1033	-8.30064		970.1	26.0627	2.6866	28.7637	2.97595
UK054	UK054_178	NA	623	8530	30.2	0.478605	NA	NA	6.15385	3.02215	0.0723	8.31871	NA	NA	1.61992	8.85067	0.1625	3.02215	0.023539	NA	NA	994.397	169.727	170.855	970.655	27.2331	29.8309	977.959	55.6218	56.5887	NA	NA	NA	81.209	2.38762		970.655	27.2331	2.80564	29.8309	3.06897
UK054	UK054_258	NA	478	7250	8.7	0.414286	NA	NA	6.14251	2.97039	0.0687	8.35236	NA	NA	1.5421	8.86483	0.1628	2.97039	0.34627	NA	NA	889.745	173.212	174.354	972.318	26.8092	29.4525	947.343	54.6562	55.6031	NA	NA	NA	33.017	-9.28051		972.318	26.8092	2.75725	29.4525	3.03578
UK054	UK054_255	NA	821	11380	33.6	0.460274	NA	NA	6.13497	3.03988	0.0737	7.56365	NA	NA	1.65637	8.15167	0.163	3.03988	0.30594	NA	NA	1033.26	153.309	154.538	973.427	27.4654	30.0562	991.988	51.6558	52.7124	NA	NA	NA	46.5464	5.79109		973.427	27.4654	2.82151	30.0562	3.08061
UK054	UK054_161	NA	1735	23920	27.1	0.460102	NA	NA	6.09756	2.93957	0.075	6.82066	NA	NA	1.69592	7.42715	0.164	2.93957	0.25618	NA	NA	1068.5	137.435	138.788	978.968	26.699	29.3843	1007	47.4752	48.6423	NA	NA	NA	24.8448	8.37939		978.968	26.699	2.72726	29.3843	2.98792
UK054	UK054_227	NA	531	7530	11.1	0.437008	NA	NA	6.035	2.98177	0.0725	8.13234	NA	NA	1.65639	8.66175	0.1657	2.98177	0.23173	NA	NA	1000.01	165.754	166.906	988.376	27.3232	29.9975	991.996	54.8945	55.8903	NA	NA	NA	89.6001	1.16342		988.376	27.3232	2.76445	29.9975	3.03359
UK054	UK054_22	NA	4910	65900	207	0.45	NA	NA	5.97729	2.92336	0.0782	5.96415	NA	NA	1.80386	6.64207	0.1673	2.92336	-0.1149	NA	NA	1151.96	118.626	120.148	997.218	27.0095	29.7549	1046.86	43.4155	44.7457	NA	NA	NA	6.75749	13.4329		997.218	27.0095	2.70849	29.7549	2.94131
UK054	UK054_112	NA	461	6900	20.2	0.469767	NA	NA	5.97015	2.98691	0.0682	8.25931	NA	NA	1.57507	8.78282	0.1675	2.98691	0.31921	NA	NA	874.638	171.676	172.833	998.322	27.6249	30.3199	960.428	54.6001	55.5636	NA	NA	NA	14.4331	-14.1411		998.322	27.6249	2.76713	30.3199	3.05009
UK054	UK054_206	NA	609	8740	15.4	0.4375	NA	NA	5.91716	2.97665	0.0724	8.00507	NA	NA	1.68704	8.54058	0.169	2.97665	0.14062	NA	NA	997.206	163.212	164.382	1006.6	27.7409	30.4651	1003.65	54.4987	55.5153	NA	NA	NA	91.8175	-0.94192		1006.6	27.7409	2.75591	30.4651	3.02804
UK054	UK054_214	NA	925	13800	18.3	0.432624	NA	NA	5.90319	2.97605	0.0696	7.57757	NA	NA	1.62564	8.14103	0.1694	2.97605	-0.015998	NA	NA	916.575	156.376	157.626	1008.8	27.7914	30.5216	980.174	51.2232	52.2736	NA	NA	NA	32.4778	-10.0624		1008.8	27.7914	2.75489	30.5216	3.04603
UK054	UK054_4	NA	764	10290	25.3	0.450178	NA	NA	5.89623	3.00812	0.0756	7.79914	NA	NA	1.76786	8.35915	0.1696	3.00812	-0.037136	NA	NA	1084.5	156.897	158.081	1009.91	28.1193	30.8257	1033.74	54.2637	55.3199	NA	NA	NA	44.5222	6.87792		1009.91	28.1193	2.78435	30.8257	3.03686
UK054	UK054_95	NA	438	5960	15.4	0.479751	NA	NA	5.88928	3.03414	0.0771	8.37957	NA	NA	1.80507	8.91197	0.1698	3.03414	0.12717	NA	NA	1123.78	167.674	168.772	1011.01	28.3911	31.079	1047.29	58.2949	59.2946	NA	NA	NA	24.3617	10.0347		1011.01	28.3911	2.8082	31.079	3.0576
UK054	UK054_16	NA	918	12700	32.8	0.491018	NA	NA	5.88582	2.9753	0.0746	7.45535	NA	NA	1.74757	8.02712	0.1699	2.9753	-0.0012725	NA	NA	1057.74	150.542	151.784	1011.56	27.8546	30.5923	1026.26	51.8863	52.9805	NA	NA	NA	61.9008	4.36631		1011.56	27.8546	2.75363	30.5923	3.01457
UK054	UK054_20	NA	1250	17500	50.3	0.458106	NA	NA	5.84454	2.90883	0.0748	7.16565	NA	NA	1.76463	7.73355	0.1711	2.90883	0.044457	NA	NA	1063.13	144.541	145.832	1018.17	27.3965	30.2078	1032.55	50.1624	51.301	NA	NA	NA	60.9357	4.22933		1018.17	27.3965	2.69076	30.2078	2.95784
UK054	UK054_68	NA	400	5420	15.6	0.45481	NA	NA	5.8072	2.98727	0.0738	8.90236	NA	NA	1.75223	9.3902	0.1722	2.98727	0.15697	NA	NA	1036	180.586	181.635	1024.22	28.2896	31.0488	1027.98	60.7756	61.7153	NA	NA	NA	90.4749	1.13728		1024.22	28.2896	2.76206	31.0488	3.02996
UK054	UK054_130	NA	1775	24520	60.3	0.469626	NA	NA	5.8072	2.92495	0.0761	6.7792	NA	NA	1.80684	7.38328	0.1722	2.92495	0.11977	NA	NA	1097.7	136	137.355	1024.22	27.6994	30.512	1047.93	48.2957	49.497	NA	NA	NA	37.1439	6.69409		1024.22	27.6994	2.70444	30.512	2.96445
UK054	UK054_231	NA	1769	24850	54	0.480855	NA	NA	5.79039	2.93054	0.0746	6.74609	NA	NA	1.77637	7.35512	0.1727	2.93054	0.32518	NA	NA	1057.74	136.146	137.515	1026.97	27.8211	30.6358	1036.85	47.8185	49.0169	NA	NA	NA	67.4075	2.90942		1026.97	27.8211	2.70905	30.6358	2.97875
UK054	UK054_18	NA	2640	34600	67.9	0.528816	NA	NA	5.77034	2.98553	0.0778	6.32026	NA	NA	1.859	6.98993	0.1733	2.98553	0.56667	NA	NA	1141.77	125.927	127.368	1030.27	28.427	31.2027	1066.63	46.1814	47.461	NA	NA	NA	6.04199	9.76579		1030.27	28.427	2.75919	31.2027	3.02593
UK054	UK054_36	NA	1940	25100	41.5	0.474828	NA	NA	5.77034	2.89253	0.0773	6.67002	NA	NA	1.84705	7.27021	0.1733	2.89253	0.37109	NA	NA	1128.94	133.18	134.55	1030.27	27.5415	30.3982	1062.38	47.9273	49.1563	NA	NA	NA	16.3449	8.74024		1030.27	27.5415	2.67324	30.3982	2.93966
UK054	UK054_160	NA	721	9940	60.7	0.477953	NA	NA	5.76037	2.9929	0.0765	7.86054	NA	NA	1.8311	8.41104	0.1736	2.9929	0.10987	NA	NA	1108.19	157.582	158.753	1031.92	28.5393	31.3128	1056.67	55.2924	56.3556	NA	NA	NA	40.771	6.88238		1031.92	28.5393	2.76566	31.3128	3.02163
UK054	UK054_207	NA	1322	17500	33.7	0.486994	NA	NA	5.75374	2.91224	0.0774	7.16642	NA	NA	1.85478	7.73555	0.1738	2.91224	0.12644	NA	NA	1131.51	143.09	144.367	1033.01	27.7974	30.6435	1065.13	51.0748	52.2336	NA	NA	NA	24.7143	8.70517		1033.01	27.7974	2.6909	30.6435	2.9491
UK054	UK054_156	NA	559	7590	55.3	0.447411	NA	NA	5.74053	3.02505	0.0772	8.34518	NA	NA	1.85424	8.87654	0.1742	3.02505	0.31432	NA	NA	1126.36	166.917	168.019	1035.21	28.9307	31.6855	1064.94	58.6181	59.6313	NA	NA	NA	29.9069	8.09244		1035.21	28.9307	2.79467	31.6855	3.05312
UK054	UK054_61	NA	667	9150	85.1	0.465027	NA	NA	5.71429	2.99062	0.0745	8.00023	NA	NA	1.79761	8.54093	0.175	2.99062	0.20781	NA	NA	1055.04	161.684	162.845	1039.6	28.7133	31.5078	1044.59	55.7802	56.8207	NA	NA	NA	86.1584	1.46367		1039.6	28.7133	2.76195	31.5078	3.02858
UK054	UK054_106	NA	1310	17830	31.7	0.522241	NA	NA	5.69801	2.91098	0.0746	7.18188	NA	NA	1.80517	7.7494	0.1755	2.91098	0.1408	NA	NA	1057.74	144.988	146.277	1042.34	28.0166	30.8875	1047.33	50.6777	51.8234	NA	NA	NA	85.4537	1.456		1042.34	28.0166	2.68785	30.8875	2.96048
UK054	UK054_125	NA	1116	16370	72.9	0.493234	NA	NA	5.69801	2.93398	0.071	7.37637	NA	NA	1.71805	7.93845	0.1755	2.93398	0.20462	NA	NA	957.413	151.236	152.511	1042.34	28.2379	31.0884	1015.3	50.9929	52.092	NA	NA	NA	30.2786	-8.87082		1042.34	28.2379	2.70908	31.0884	2.99707
UK054	UK054_218	NA	2620	38000	155	0.426997	NA	NA	5.68505	3.09573	0.073	6.6845	NA	NA	1.77048	7.36655	0.1759	3.09573	-0.075615	NA	NA	1013.95	135.794	137.185	1044.54	29.8524	32.5719	1034.69	47.8355	49.0307	NA	NA	NA	73.4768	-3.01635		1044.54	29.8524	2.85796	32.5719	3.12705
UK054	UK054_123	NA	2520	32390	70.2	0.54	NA	NA	5.65611	2.95865	0.0795	6.62521	NA	NA	1.93799	7.25582	0.1768	2.95865	0.23011	NA	NA	1184.61	131.204	132.571	1049.47	28.6546	31.5012	1094.3	48.6351	49.8871	NA	NA	NA	7.95692	11.4082		1049.47	28.6546	2.73039	31.5012	2.97827
UK054	UK054_103	NA	3250	43100	149.4	0.475796	NA	NA	5.61482	2.90406	0.0759	6.2243	NA	NA	1.86383	6.86844	0.1781	2.90406	0.15824	NA	NA	1092.43	124.917	126.391	1056.59	28.3014	31.2147	1068.35	45.4189	46.7217	NA	NA	NA	63.6086	3.28145		1056.59	28.3014	2.67857	31.2147	2.94642
UK054	UK054_194	NA	6840	95900	211	0.50358	NA	NA	5.58659	2.86472	0.0748	5.54977	NA	NA	1.8461	6.24552	0.179	2.86472	0.39913	NA	NA	1063.13	111.822	113.478	1061.51	28.0377	30.9999	1062.04	41.1568	42.5801	NA	NA	NA	97.8522	0.152679		1061.51	28.0377	2.64131	30.9999	2.92005
UK054	UK054_69	NA	1566	23750	31.2	0.530612	NA	NA	5.58036	2.93647	0.068	6.88713	NA	NA	1.68015	7.48701	0.1792	2.93647	0.23423	NA	NA	868.554	143.124	144.506	1062.6	28.7671	31.6663	1001.04	47.6921	48.8461	NA	NA	NA	1.1389	-22.3416		1062.6	28.7671	2.70723	31.6663	3.01945
UK054	UK054_96	NA	840	12530	46	0.482686	NA	NA	5.57103	2.96214	0.0715	7.70354	NA	NA	1.76959	8.25341	0.1795	2.96214	0.1769	NA	NA	971.742	157.638	158.858	1064.24	29.0598	31.9403	1034.37	53.5949	54.6647	NA	NA	NA	28.3237	-9.51899		1064.24	29.0598	2.73057	31.9403	3.01713
UK054	UK054_202	NA	1420	19600	21.1	0.508434	NA	NA	5.54631	3.05635	0.0747	7.00696	NA	NA	1.85702	7.64453	0.1803	3.05635	0.52712	NA	NA	1060.44	141.38	142.7	1068.61	30.0973	32.9072	1065.93	50.4942	51.6669	NA	NA	NA	90.0581	-0.770668		1068.61	30.0973	2.81649	32.9072	3.07988
UK054	UK054_212	NA	311	4210	4.05	0.44702	NA	NA	5.51876	3.0819	0.0801	9.0091	NA	NA	2.00121	9.52166	0.1812	3.0819	-0.031287	NA	NA	1199.45	178.382	179.394	1073.53	30.4772	33.2775	1115.92	64.554	65.5253	NA	NA	NA	24.6483	10.4985		1073.53	30.4772	2.83898	33.2775	3.07765
UK054	UK054_32	NA	664	8640	20	0.462963	NA	NA	5.48847	2.96558	0.0788	7.78384	NA	NA	1.97959	8.32963	0.1822	2.96558	0.16832	NA	NA	1167.12	154.681	155.853	1078.98	29.4637	32.3777	1108.58	56.2495	57.3522	NA	NA	NA	31.9664	7.55139		1078.98	29.4637	2.7307	32.3777	2.98743
UK054	UK054_195	NA	222	2970	10.3	0.512438	NA	NA	5.47345	3.19014	0.0774	9.78237	NA	NA	1.94976	10.2894	0.1827	3.19014	0.3095	NA	NA	1131.51	195.788	196.733	1081.71	31.7684	34.5003	1098.36	69.1648	70.0573	NA	NA	NA	61.8826	4.40176		1081.71	31.7684	2.93687	34.5003	3.18596
UK054	UK054_241	NA	1335	18870	39.2	0.425163	NA	NA	5.44662	3.04049	0.0752	7.39159	NA	NA	1.90367	7.99251	0.1836	3.04049	0.30716	NA	NA	1073.85	148.886	150.135	1086.61	30.4042	33.2711	1082.37	53.2544	54.3872	NA	NA	NA	87.167	-1.18821		1086.61	30.4042	2.79807	33.2711	3.06378
UK054	UK054_189	NA	344	5120	11.5	0.479167	NA	NA	5.44366	3.0945	0.0687	9.00378	NA	NA	1.74007	9.52071	0.1837	3.0945	0.16534	NA	NA	889.745	186.84	187.902	1087.16	30.9585	33.7809	1023.49	61.466	62.3907	NA	NA	NA	4.20834	-22.1873		1087.16	30.9585	2.84766	33.7809	3.13896
UK054	UK054_25	NA	1390	17900	66.2	0.469504	NA	NA	5.4407	2.92081	0.0778	7.1958	NA	NA	1.97163	7.766	0.1838	2.92081	0.39519	NA	NA	1141.77	143.462	144.732	1087.7	29.2342	32.2107	1105.87	52.3652	53.5442	NA	NA	NA	45.9975	4.73561		1087.7	29.2342	2.6877	32.2107	2.95649
UK054	UK054_232	NA	188	2590	9.5	0.568862	NA	NA	5.43774	3.26571	0.0772	10.1224	NA	NA	1.95749	10.6362	0.1839	3.26571	0.21464	NA	NA	1126.36	202.823	203.738	1088.25	32.7014	35.3898	1101.02	71.5996	72.4648	NA	NA	NA	72.3755	3.38394		1088.25	32.7014	3.00496	35.3898	3.24793
UK054	UK054_262	NA	1610	23000	53.8	0.539078	NA	NA	5.39957	2.89976	0.074	6.88963	NA	NA	1.88962	7.475	0.1852	2.89976	0.16691	NA	NA	1041.47	139.399	140.744	1095.32	29.2101	32.2254	1077.45	49.6731	50.8789	NA	NA	NA	49.9559	-5.17084		1095.32	29.2101	2.6668	32.2254	2.95273
UK054	UK054_132	NA	1210	16370	67.8	0.538951	NA	NA	5.36193	2.92408	0.0773	7.24273	NA	NA	1.98774	7.81072	0.1865	2.92408	0.32994	NA	NA	1128.94	144.677	145.941	1102.39	29.6293	32.6396	1111.35	52.8116	53.9872	NA	NA	NA	72.743	2.35201		1102.39	29.6293	2.68774	32.6396	2.95757
UK054	UK054_222	NA	502	7040	14.9	0.459877	NA	NA	5.34188	3.16417	0.0744	9.70588	NA	NA	1.92035	10.2086	0.1872	3.16417	0.23547	NA	NA	1052.34	196.56	197.522	1106.19	32.1635	34.9732	1088.19	68.2647	69.1594	NA	NA	NA	59.4916	-5.1173		1106.19	32.1635	2.90759	34.9732	3.16756
UK054	UK054_99	NA	2480	34400	72.7	0.557088	NA	NA	5.29942	2.88157	0.0735	6.4621	NA	NA	1.91232	7.07546	0.1887	2.88157	0.19548	NA	NA	1027.77	130.98	132.415	1114.33	29.4883	32.5691	1085.39	47.2084	48.4855	NA	NA	NA	24.8042	-8.42188		1114.33	29.4883	2.64628	32.5691	2.9413
UK054	UK054_215	NA	2204	31600	102.6	0.528866	NA	NA	5.27426	2.90182	0.0727	6.561	NA	NA	1.90053	7.17407	0.1896	2.90182	0.17993	NA	NA	1005.6	133.443	134.862	1119.21	29.8146	32.8881	1081.27	47.7653	49.0227	NA	NA	NA	13.6758	-11.2973		1119.21	29.8146	2.6639	32.8881	2.96357
UK054	UK054_226	NA	1799	23980	65	0.548986	NA	NA	5.2356	2.90562	0.0788	6.71198	NA	NA	2.0752	7.31391	0.191	2.90562	0.34765	NA	NA	1167.12	133.27	134.624	1126.79	30.0387	33.1277	1140.65	50.1556	51.4268	NA	NA	NA	57.0643	3.45516		1126.79	30.0387	2.66587	33.1277	2.9344
UK054	UK054_117	NA	3240	43100	105.1	0.568108	NA	NA	5.20562	2.89602	0.0783	6.2162	NA	NA	2.07391	6.8577	0.1921	2.89602	0.24313	NA	NA	1154.5	123.613	125.075	1132.74	30.0842	33.1974	1140.23	47.013	48.3657	NA	NA	NA	76.1639	1.88432		1132.74	30.0842	2.65587	33.1974	2.92628
UK054	UK054_188	NA	2570	34800	84.8	0.526708	NA	NA	5.18941	2.90929	0.0777	6.38766	NA	NA	2.06445	7.01898	0.1927	2.90929	0.20832	NA	NA	1139.21	127.323	128.75	1135.98	30.3011	33.4096	1137.09	48.0485	49.3692	NA	NA	NA	96.5407	0.283375		1135.98	30.3011	2.66739	33.4096	2.94035
UK054	UK054_98	NA	1118	15040	38.7	0.563319	NA	NA	5.12821	2.96953	0.0769	7.26257	NA	NA	2.06758	7.84622	0.195	2.96953	-0.0055621	NA	NA	1118.6	145.298	146.561	1148.4	31.2375	34.3191	1138.13	53.748	54.9338	NA	NA	NA	74.0771	-2.66463		1148.4	31.2375	2.72008	34.3191	2.99528
UK054	UK054_153	NA	1720	24600	65.3	0.56832	NA	NA	5.12033	2.90306	0.0734	6.90975	NA	NA	1.97651	7.49482	0.1953	2.90306	0.16683	NA	NA	1025.02	140.158	141.502	1150.02	30.5776	33.7272	1107.53	50.5757	51.7972	NA	NA	NA	11.467	-12.1954		1150.02	30.5776	2.65887	33.7272	2.95895
UK054	UK054_208	NA	712	9820	22.6	0.517162	NA	NA	5.11509	2.95018	0.0749	7.85103	NA	NA	2.01897	8.38703	0.1955	2.95018	0.22252	NA	NA	1065.82	158.391	159.571	1151.1	31.1005	34.2071	1121.91	57.0118	58.1145	NA	NA	NA	31.3606	-8.00149		1151.1	31.1005	2.70181	34.2071	2.98497
UK054	UK054_93	NA	913	11750	35.4	0.534743	NA	NA	5.09944	2.94367	0.079	7.52633	NA	NA	2.13602	8.08151	0.1961	2.94367	0.12491	NA	NA	1172.13	149.422	150.633	1154.34	31.1115	34.2324	1160.54	55.9485	57.113	NA	NA	NA	83.7788	1.51856		1154.34	31.1115	2.69519	34.2324	2.96231
UK054	UK054_243	NA	781	10660	30.9	0.580827	NA	NA	4.97018	2.91806	0.082	7.70805	NA	NA	2.2748	8.24192	0.2012	2.91806	0.16431	NA	NA	1245.52	151.433	152.602	1181.76	31.5086	34.7224	1204.5	58.1958	59.361	NA	NA	NA	46.2196	5.11861		1181.76	31.5086	2.66624	34.7224	2.92817
UK054	UK054_56	NA	998	13150	23.9	0.600503	NA	NA	4.47027	2.96701	0.0796	7.53542	NA	NA	2.45516	8.0985	0.2237	2.96701	0.3505	NA	NA	1187.09	149.277	150.483	1301.4	34.9649	38.4199	1258.94	58.496	59.7087	NA	NA	NA	12.8071	-9.62864		1187.09	149.277	12.575	150.483	11.629
UK054	UK054_220	NA	1778	23000	58.9	0.554092	NA	NA	4.9456	2.8838	0.0798	6.7571	NA	NA	2.22477	7.34675	0.2022	2.8838	0.18446	NA	NA	1192.05	133.683	135.023	1187.13	31.2674	34.5292	1188.87	51.5091	52.8032	NA	NA	NA	94.9479	0.412856		1187.13	31.2674	2.63387	34.5292	2.90768
UK054	UK054_90	NA	3660	48100	116.6	0.555238	NA	NA	4.90196	2.89044	0.0804	6.11439	NA	NA	2.26145	6.76317	0.204	2.89044	0.43295	NA	NA	1206.82	120.656	122.13	1196.77	31.5711	34.8502	1200.36	47.6513	49.0606	NA	NA	NA	87.1551	0.832332		1196.77	31.5711	2.63802	34.8502	2.91049
UK054	UK054_210	NA	1384	17610	42.7	0.573925	NA	NA	4.85201	2.93994	0.0815	7.00107	NA	NA	2.31599	7.59331	0.2061	2.93994	0.095659	NA	NA	1233.53	137.705	138.992	1208.01	32.3858	35.6424	1217.2	53.9004	55.1693	NA	NA	NA	76.0414	2.06897		1208.01	32.3858	2.68093	35.6424	2.9451
UK054	UK054_52	NA	1940	24400	23.5	0.601023	NA	NA	4.83559	2.90972	0.0815	6.71869	NA	NA	2.32386	7.3217	0.2068	2.90972	0.068521	NA	NA	1233.53	132.124	133.463	1211.75	32.1432	35.4397	1219.6	52.0222	53.3381	NA	NA	NA	79.1153	1.76575		1211.75	32.1432	2.65263	35.4397	2.91975
UK054	UK054_120	NA	1410	17900	39.4	0.623418	NA	NA	4.77555	2.92195	0.0808	7.09978	NA	NA	2.33286	7.67754	0.2094	2.92195	0.19975	NA	NA	1216.58	139.999	141.271	1225.62	32.6138	35.932	1222.35	54.6188	55.8769	NA	NA	NA	90.968	-0.742755		1225.62	32.6138	2.66101	35.932	2.93341
UK054	UK054_8	NA	1618	19710	61	0.638743	NA	NA	4.4287	3.09096	0.0822	7.12063	NA	NA	2.55916	7.76256	0.2258	3.09096	0.15067	NA	NA	1250.29	139.732	140.995	1312.45	36.7046	40.0582	1289.05	56.7331	58.0119	NA	NA	NA	45.2808	-4.97193		1250.29	139.732	11.176	140.995	10.7947
UK054	UK054_131	NA	1105	13910	63.8	0.660455	NA	NA	4.10678	2.96333	0.0826	7.36064	NA	NA	2.77319	7.93476	0.2435	2.96333	0.21336	NA	NA	1259.78	144.272	145.493	1404.87	37.4073	41.1123	1348.35	59.2827	60.5625	NA	NA	NA	6.80651	-11.5168		1259.78	144.272	11.4522	145.493	10.4621
UK054	UK054_264	NA	698	9170	58.5	0.635179	NA	NA	4.58505	3.01764	0.0797	7.87132	NA	NA	2.39671	8.42993	0.2181	3.01764	0.28668	NA	NA	1189.57	155.918	157.074	1271.83	34.8307	38.1628	1241.62	60.4678	61.6258	NA	NA	NA	31.2673	-6.91454		1271.83	34.8307	2.73863	38.1628	3.01326
UK054	UK054_228	NA	1387	17320	61.7	0.678768	NA	NA	4.095	2.90948	0.0832	7.12724	NA	NA	2.80137	7.69823	0.2442	2.90948	-0.055209	NA	NA	1273.91	139.391	140.648	1408.49	36.8124	40.5884	1355.9	57.6657	58.9872	NA	NA	NA	12.8571	-10.5645		1273.91	139.391	10.942	140.648	10.1031
UK054	UK054_224	NA	1099	13610	72.6	0.628571	NA	NA	4.39947	2.98021	0.0843	7.40185	NA	NA	2.64197	7.97929	0.2273	2.98021	0.031474	NA	NA	1299.49	144.267	145.474	1320.33	35.581	39.0671	1312.41	58.8398	60.096	NA	NA	NA	81.4633	-1.6043		1299.49	144.267	11.1018	145.474	11.0354
UK054	UK054_244	NA	2040	24680	67.5	0.683891	NA	NA	4.01445	2.90705	0.0848	6.5839	NA	NA	2.91253	7.19713	0.2491	2.90705	0.16942	NA	NA	1310.97	128.04	129.391	1433.83	37.3725	41.212	1385.17	54.4525	55.8776	NA	NA	NA	10.3967	-9.37196		1310.97	128.04	9.76681	129.391	9.11742
UK054	UK054_74	NA	2724	33070	70.5	0.749203	NA	NA	3.9032	2.90376	0.0851	6.32711	NA	NA	3.00615	6.96162	0.2562	2.90376	0.31661	NA	NA	1317.82	122.906	124.31	1470.37	38.1773	42.108	1409.18	53.0908	54.5744	NA	NA	NA	2.30543	-11.5762		1317.82	122.906	9.32648	124.31	8.56
UK054	UK054_266	NA	731	9080	24.4	0.605459	NA	NA	4.38982	3.15923	0.0854	8.38206	NA	NA	2.68233	8.95766	0.2278	3.15923	0.30894	NA	NA	1324.64	162.924	163.99	1322.96	37.786	41.0968	1323.6	66.3486	67.4756	NA	NA	NA	98.4358	0.126686		1324.64	162.924	12.2995	163.99	12.3948
UK054	UK054_154	NA	4070	49300	153.3	0.7	NA	NA	3.99042	2.89601	0.0864	6.02419	NA	NA	2.98536	6.68414	0.2506	2.89601	0.10529	NA	NA	1347.15	116.519	117.985	1441.57	37.4098	41.2812	1403.9	50.8824	52.4228	NA	NA	NA	20.4642	-7.00907		1347.15	116.519	8.64931	117.985	8.25896
UK054	UK054_242	NA	1389	16650	68.9	0.62128	NA	NA	4.24809	2.91023	0.0867	7.11366	NA	NA	2.81402	7.68594	0.2354	2.91023	0.1213	NA	NA	1353.84	137.565	138.81	1362.74	35.7477	39.4127	1359.28	57.6417	58.9669	NA	NA	NA	91.3738	-0.657612		1353.84	137.565	10.1611	138.81	10.1927
UK054	UK054_190	NA	302	3570	16.2	0.689362	NA	NA	4.31593	3.10931	0.087	9.31273	NA	NA	2.77937	9.81809	0.2317	3.10931	0.28088	NA	NA	1360.49	180.261	181.218	1343.4	37.7058	41.1121	1350.01	73.4413	74.4819	NA	NA	NA	85.5548	1.25632		1360.49	180.261	13.2496	181.218	13.4815
UK054	UK054_143	NA	1213	14240	66.4	0.728869	NA	NA	4.04531	2.92778	0.0876	7.25343	NA	NA	2.98575	7.82203	0.2472	2.92778	0.14543	NA	NA	1373.73	139.894	141.113	1424.02	37.4089	41.2004	1404	59.5649	60.8878	NA	NA	NA	53.8835	-3.66106		1373.73	139.894	10.1836	141.113	9.94532
UK054	UK054_63	NA	521	6170	8.9	0.644928	NA	NA	3.71885	3.08681	0.0885	8.31765	NA	NA	3.28122	8.87196	0.2689	3.08681	0.33017	NA	NA	1393.36	160.121	161.185	1535.22	42.1694	46.0324	1476.61	69.1494	70.3469	NA	NA	NA	7.89231	-10.1808		1393.36	160.121	11.4917	161.185	10.579
UK054	UK054_171	NA	887	10580	15.1	0.665198	NA	NA	4.04531	2.96492	0.0894	7.51336	NA	NA	3.0471	8.07721	0.2472	2.96492	0.14671	NA	NA	1412.74	144.157	145.329	1424.02	37.8834	41.6317	1419.51	61.8259	63.1147	NA	NA	NA	89.3566	-0.798144		1412.74	144.157	10.2041	145.329	10.2133
UK054	UK054_62	NA	2850	32900	83.2	0.669887	NA	NA	3.89712	2.87934	0.0903	6.36564	NA	NA	3.19481	6.98655	0.2566	2.87934	0.051847	NA	NA	1431.88	121.717	123.091	1472.42	37.9031	41.8689	1455.91	54.0799	55.5807	NA	NA	NA	60.652	-2.8313		1431.88	121.717	8.50051	123.091	8.39034
UK054	UK054_173	NA	2170	25200	104	0.670968	NA	NA	3.92311	2.89436	0.0905	6.58124	NA	NA	3.18068	7.18958	0.2549	2.89436	0.19858	NA	NA	1436.1	125.785	127.114	1463.7	37.8998	41.8261	1452.48	55.5955	57.0537	NA	NA	NA	71.0915	-1.92142		1436.1	125.785	8.75879	127.114	8.7031
UK054	UK054_137	NA	2530	28900	90.7	0.7291	NA	NA	3.75657	2.90615	0.0909	6.38901	NA	NA	3.33636	7.01892	0.2662	2.90615	0.30992	NA	NA	1444.51	121.956	123.322	1521.48	39.3865	43.4353	1489.6	54.8871	56.3965	NA	NA	NA	25.7321	-5.32888		1444.51	121.956	8.44274	123.322	8.15426
UK054	UK054_186	NA	1219	13860	36.2	0.630662	NA	NA	4.24268	2.96566	0.0912	7.23619	NA	NA	2.96385	7.82033	0.2357	2.96566	0.18113	NA	NA	1450.78	138.091	139.299	1364.3	36.4663	40.0727	1398.4	59.4415	60.7621	NA	NA	NA	28.9929	5.96081		1450.78	138.091	9.51836	139.299	10.1543
UK054	UK054_159	NA	8390	96200	323	0.674322	NA	NA	3.85951	2.92057	0.0914	5.39852	NA	NA	3.26524	6.1379	0.2591	2.92057	0.59751	NA	NA	1454.95	102.842	104.45	1485.24	38.7434	42.6888	1472.81	47.7464	49.4556	NA	NA	NA	52.9003	-2.08155		1454.95	102.842	7.06842	104.45	7.04801
UK054	UK054_251	NA	1365	15390	67.9	0.692151	NA	NA	3.885	2.9606	0.0916	7.07829	NA	NA	3.25091	7.6725	0.2574	2.9606	0.27451	NA	NA	1459.11	134.909	136.143	1476.53	39.0696	42.9461	1469.4	59.6471	61.0233	NA	NA	NA	81.6625	-1.19383		1459.11	134.909	9.24602	136.143	9.23101
UK054	UK054_110	NA	566	6330	29.8	0.660754	NA	NA	4.12371	3.0873	0.0917	8.21727	NA	NA	3.06607	8.77809	0.2425	3.0873	0.13252	NA	NA	1461.18	156.713	157.779	1399.68	38.8434	42.4006	1424.25	67.3089	68.4993	NA	NA	NA	50.4133	4.20893		1461.18	156.713	10.7251	157.779	11.2308
UK054	UK054_200	NA	1900	20700	51.1	0.675926	NA	NA	3.92927	2.92728	0.0921	6.745	NA	NA	3.23183	7.35283	0.2545	2.92728	0.30828	NA	NA	1469.45	128.347	129.638	1461.64	38.2829	42.1643	1464.83	57.0771	58.5093	NA	NA	NA	91.2689	0.531321		1469.45	128.347	8.73437	129.638	8.86484
UK054	UK054_9	NA	5390	59300	141.4	0.65463	NA	NA	3.96825	2.9331	0.0926	5.75023	NA	NA	3.21746	6.45509	0.252	2.9331	0.46923	NA	NA	1479.72	109.198	110.704	1448.78	38.058	41.902	1461.37	50.0433	51.6659	NA	NA	NA	58.9457	2.09083		1479.72	109.198	7.37962	110.704	7.62464
UK054	UK054_261	NA	5410	60900	272.4	0.681	NA	NA	4.1806	2.87848	0.0926	5.7562	NA	NA	3.05403	6.4358	0.2392	2.87848	0.1255	NA	NA	1479.72	109.311	110.817	1382.54	35.8184	39.5682	1421.24	49.2674	50.8742	NA	NA	NA	17.9091	6.56769		1479.72	109.311	7.38731	110.817	7.94555
UK054	UK054_37	NA	5520	61700	173.1	0.643494	NA	NA	3.98883	2.91754	0.0929	5.72403	NA	NA	3.21123	6.42469	0.2507	2.91754	0.59964	NA	NA	1485.85	108.609	110.121	1442.08	37.6999	41.5466	1459.87	49.7843	51.4135	NA	NA	NA	38.3507	2.94546		1485.85	108.609	7.30955	110.121	7.62057
UK054	UK054_30	NA	8140	89800	156	0.65	NA	NA	4.15455	2.87809	0.0931	5.42446	NA	NA	3.08978	6.1407	0.2407	2.87809	0.17816	NA	NA	1489.92	102.851	104.444	1390.34	35.9945	39.7637	1430.16	47.1397	48.8256	NA	NA	NA	14.3173	6.68406		1489.92	102.851	6.90312	104.444	7.44202
UK054	UK054_236	NA	2650	30400	78.2	0.639935	NA	NA	4.1684	2.90413	0.0933	6.37572	NA	NA	3.08612	7.00598	0.2399	2.90413	0.21129	NA	NA	1493.98	120.89	122.25	1386.18	36.2228	39.9514	1429.25	53.7782	55.2624	NA	NA	NA	14.2715	7.21607		1493.98	120.89	8.0918	122.25	8.75037
UK054	UK054_38	NA	3700	40680	140.2	0.728312	NA	NA	3.78358	2.90033	0.0935	6.03032	NA	NA	3.4073	6.69153	0.2643	2.90033	0.33816	NA	NA	1498.03	114.254	115.689	1511.8	39.0857	43.119	1506.08	52.5752	54.1636	NA	NA	NA	83.1335	-0.919153		1498.03	114.254	7.62693	115.689	7.66078
UK054	UK054_42	NA	2920	31400	52.7	0.729917	NA	NA	3.82995	2.9157	0.0938	6.25721	NA	NA	3.37684	6.90318	0.2611	2.9157	0.28608	NA	NA	1504.09	118.473	119.856	1495.47	38.9156	42.8911	1499.04	54.1303	55.6684	NA	NA	NA	90.0156	0.573333		1504.09	118.473	7.87675	119.856	8.00927
UK054	UK054_245	NA	838	9470	20.5	0.734767	NA	NA	4.03551	3.25751	0.094	8.91239	NA	NA	3.21167	9.48905	0.2478	3.25751	0.0015803	NA	NA	1508.11	169	169.979	1427.12	41.7029	45.148	1459.98	73.6019	74.7178	NA	NA	NA	44.0568	5.37057		1508.11	169	11.206	169.979	11.8462
UK054	UK054_180	NA	1910	21200	74.6	0.667263	NA	NA	3.86399	2.92866	0.0946	6.61762	NA	NA	3.37564	7.23671	0.2588	2.92866	0.33195	NA	NA	1520.12	125.059	126.365	1483.7	38.8151	42.7469	1498.76	56.7463	58.2157	NA	NA	NA	59.9334	2.39601		1520.12	125.059	8.22689	126.365	8.49686
UK054	UK054_82	NA	5150	56100	201	0.690722	NA	NA	3.81825	2.96144	0.095	5.83385	NA	NA	3.43052	6.54247	0.2619	2.96144	0.16344	NA	NA	1528.07	110.076	111.552	1499.56	39.6221	43.5512	1511.42	51.4812	53.107	NA	NA	NA	69.1219	1.8663		1528.07	110.076	7.20361	111.552	7.4188
UK054	UK054_256	NA	4300	47600	80.6	0.732727	NA	NA	3.5461	2.89969	0.0958	5.91201	NA	NA	3.72491	6.58484	0.282	2.89969	0.22438	NA	NA	1543.85	111.323	112.777	1601.43	41.1185	45.3634	1576.74	52.7579	54.4031	NA	NA	NA	40.1333	-3.72923		1543.85	111.323	7.21073	112.777	7.08078
UK054	UK054_158	NA	2580	28100	114	0.726115	NA	NA	3.5461	3.06577	0.0968	6.54147	NA	NA	3.76379	7.22424	0.282	3.06577	0.12637	NA	NA	1563.35	122.907	124.221	1601.43	43.4735	47.5085	1585.06	58.0186	59.5262	NA	NA	NA	62.8613	-2.43577		1563.35	122.907	7.86181	124.221	7.78438
UK054	UK054_141	NA	3990	43300	88.7	0.765976	NA	NA	3.86548	2.88417	0.0969	6.04782	NA	NA	3.45638	6.70034	0.2587	2.88417	0.11437	NA	NA	1565.28	113.568	114.986	1483.19	38.2136	42.1992	1517.32	52.815	54.4065	NA	NA	NA	27.0601	5.24478		1565.28	113.568	7.25542	114.986	7.69674
UK054	UK054_66	NA	8850	92200	677	0.797409	NA	NA	3.40716	2.87365	0.0973	5.355	NA	NA	3.93751	6.07733	0.2935	2.87365	0.23211	NA	NA	1573	100.417	102.012	1659	42.0339	46.4485	1621.43	49.2489	51.0468	NA	NA	NA	18.3354	-5.46694		1573	100.417	6.38375	102.012	6.20676
UK054	UK054_138	NA	4620	48100	209	0.754513	NA	NA	3.57015	2.94721	0.0983	5.94486	NA	NA	3.79636	6.63532	0.2801	2.94721	0.4559	NA	NA	1592.12	111.236	112.672	1591.87	41.5724	45.7331	1591.98	53.3761	55.0158	NA	NA	NA	99.65	0.0161692		1592.12	111.236	6.98662	112.672	7.07787
UK054	UK054_59	NA	2280	24600	74	0.708812	NA	NA	3.48675	2.91691	0.0984	6.48987	NA	NA	3.89113	7.11525	0.2868	2.91691	0.22646	NA	NA	1594.02	121.444	122.763	1625.52	41.9098	46.1878	1611.84	57.5375	59.0781	NA	NA	NA	66.3184	-1.97588		1594.02	121.444	7.61873	122.763	7.57195
UK054	UK054_157	NA	2440	25900	103	0.757353	NA	NA	3.57654	3.05182	0.0986	6.77166	NA	NA	3.80115	7.42758	0.2796	3.05182	0.16144	NA	NA	1597.81	126.678	127.943	1589.35	42.9879	47.0128	1592.99	59.779	61.2496	NA	NA	NA	91.439	0.529818		1597.81	126.678	7.92823	127.943	8.04426
UK054	UK054_199	NA	1750	18300	68.7	0.737916	NA	NA	3.43407	2.90837	0.099	6.74624	NA	NA	3.97491	7.34645	0.2912	2.90837	0.16565	NA	NA	1605.37	126.076	127.344	1647.52	42.2836	46.624	1629.09	59.6691	61.1692	NA	NA	NA	58.1216	-2.62602		1605.37	126.076	7.85344	127.344	7.75631
UK054	UK054_265	NA	910	9560	29.3	0.7325	NA	NA	3.78072	3.04414	0.0991	7.65538	NA	NA	3.6141	8.23842	0.2645	3.04414	0.19071	NA	NA	1607.25	143.125	144.245	1512.82	41.0483	44.9101	1552.64	65.6132	66.9288	NA	NA	NA	26.3252	5.8749		1607.25	143.125	8.90497	144.245	9.47872
UK054	UK054_135	NA	1022	10470	51.5	0.767511	NA	NA	3.6914	3.07711	0.0996	7.44211	NA	NA	3.72023	8.05317	0.2709	3.07711	0.36368	NA	NA	1616.62	138.946	140.096	1545.37	42.283	46.1797	1575.73	64.5339	65.8873	NA	NA	NA	33.9162	4.40768		1616.62	138.946	8.59481	140.096	9.03199
UK054	UK054_58	NA	2030	21100	65.8	0.741826	NA	NA	3.32447	2.95686	0.0999	6.95159	NA	NA	4.14328	7.55431	0.3008	2.95686	0.059875	NA	NA	1622.22	129.648	130.876	1695.27	44.0781	48.4621	1662.88	61.868	63.3402	NA	NA	NA	37.6288	-4.50325		1622.22	129.648	7.99201	130.876	7.76992
UK054	UK054_109	NA	5640	58900	256	0.8	NA	NA	3.67512	2.89429	0.1001	5.73625	NA	NA	3.75547	6.42507	0.2721	2.89429	0.28926	NA	NA	1625.94	106.849	108.33	1551.45	39.9092	44.0439	1583.28	51.5646	53.2521	NA	NA	NA	25.2945	4.58132		1625.94	106.849	6.57149	108.33	6.93773
UK054	UK054_24	NA	1960	20000	162	0.666667	NA	NA	3.51741	2.94033	0.1005	6.81882	NA	NA	3.93953	7.42576	0.2843	2.94033	0.11876	NA	NA	1633.35	126.977	128.227	1612.98	41.9596	46.1778	1621.84	60.2058	61.6877	NA	NA	NA	79.81	1.24731		1633.35	126.977	7.77402	128.227	7.93648
UK054	UK054_84	NA	7320	74300	169	0.8125	NA	NA	3.34001	2.88123	0.1006	5.51723	NA	NA	4.1529	6.22425	0.2994	2.88123	0.24781	NA	NA	1635.2	102.633	104.17	1688.33	42.7968	47.2691	1664.78	50.9778	52.7536	NA	NA	NA	41.3536	-3.24916		1635.2	102.633	6.2765	104.17	6.20411
UK054	UK054_144	NA	2180	22870	36	0.880196	NA	NA	3.2041	2.915	0.1008	6.56933	NA	NA	4.33766	7.18702	0.3121	2.915	0.24935	NA	NA	1638.89	122.224	123.519	1751.03	44.6982	49.2666	1700.55	59.3715	60.9302	NA	NA	NA	11.4987	-6.84254		1638.89	122.224	7.45771	123.519	7.12312
UK054	UK054_155	NA	2341	24350	103.7	0.800154	NA	NA	3.63636	3.05851	0.1008	6.5119	NA	NA	3.82203	7.19439	0.275	3.05851	0.40476	NA	NA	1638.89	121.151	122.457	1566.13	42.5262	46.4912	1597.4	57.9642	59.4827	NA	NA	NA	27.0656	4.43953		1638.89	121.151	7.39224	122.457	7.78154
UK054	UK054_113	NA	1850	17930	41.8	0.721934	NA	NA	3.43997	2.93257	0.1011	6.71327	NA	NA	4.05226	7.32584	0.2907	2.93257	0.17735	NA	NA	1644.41	124.825	126.092	1645.03	42.5787	46.8808	1644.75	59.731	61.241	NA	NA	NA	99.3501	-0.0377235		1644.41	124.825	7.59088	126.092	7.66544
UK054	UK054_64	NA	4610	47300	139.2	0.785553	NA	NA	3.61925	2.91869	0.1012	5.87371	NA	NA	3.85534	6.5589	0.2763	2.91869	0.49096	NA	NA	1646.24	109.131	110.575	1572.7	40.7324	44.8854	1604.39	52.9294	54.5929	NA	NA	NA	19.4104	4.46707		1646.24	109.131	6.62913	110.575	6.99723
UK054	UK054_165	NA	5240	53600	492	0.76875	NA	NA	3.51741	2.91138	0.1013	5.83308	NA	NA	3.97089	6.51928	0.2843	2.91138	0.16008	NA	NA	1648.07	108.349	109.802	1612.98	41.5465	45.8027	1628.27	52.9269	54.6102	NA	NA	NA	62.1862	2.12914		1648.07	108.349	6.57426	109.802	6.78453
UK054	UK054_85	NA	5510	55100	167.2	0.819608	NA	NA	3.30579	2.90683	0.1021	5.74081	NA	NA	4.25846	6.43479	0.3025	2.90683	0.33969	NA	NA	1662.65	106.43	107.903	1703.69	43.5202	47.9921	1685.37	52.9605	54.6887	NA	NA	NA	51.0929	-2.46888		1662.65	106.43	6.40124	107.903	6.35828
UK054	UK054_150	NA	2640	26530	76.9	1.0172	NA	NA	3.18573	2.95937	0.1031	6.41822	NA	NA	4.46222	7.06763	0.3139	2.95937	0.34182	NA	NA	1680.66	118.763	120.081	1759.87	45.5778	50.1037	1723.97	58.6906	60.2832	NA	NA	NA	23.3454	-4.71274		1680.66	118.763	7.06643	120.081	6.86958
UK054	UK054_35	NA	2150	21900	79.9	0.746032	NA	NA	3.45662	2.89997	0.1032	6.57169	NA	NA	4.11651	7.1831	0.2893	2.89997	0.3306	NA	NA	1682.45	121.587	122.875	1638.03	41.9481	46.2778	1657.59	58.7464	60.2903	NA	NA	NA	51.5238	2.64046		1682.45	121.587	7.22676	122.875	7.47844
UK054	UK054_44	NA	2630	25710	54.9	0.732977	NA	NA	3.45066	3.01201	0.1042	6.59061	NA	NA	4.16358	7.24627	0.2898	3.01201	0.40645	NA	NA	1700.24	121.663	122.944	1640.53	43.6272	47.8159	1666.88	59.3957	60.93	NA	NA	NA	36.3679	3.51179		1700.24	121.663	7.15566	122.944	7.46491
UK054	UK054_34	NA	1890	19100	55.8	0.832836	NA	NA	3.34896	2.971	0.1049	6.70196	NA	NA	4.31883	7.33097	0.2986	2.971	0.32486	NA	NA	1712.56	123.535	124.793	1684.36	44.0394	48.3799	1696.96	60.5139	62.0417	NA	NA	NA	68.609	1.64664		1712.56	123.535	7.21346	124.793	7.39383
UK054	UK054_191	NA	4150	41800	133.6	0.84557	NA	NA	3.18066	2.90518	0.1051	5.94567	NA	NA	4.55603	6.61749	0.3144	2.90518	0.31659	NA	NA	1716.06	109.495	110.909	1762.32	44.7975	49.4056	1741.26	55.1533	56.8569	NA	NA	NA	47.3435	-2.69557		1716.06	109.495	6.38058	110.909	6.32055
UK054	UK054_43	NA	2190	20850	100.6	0.745185	NA	NA	3.59842	2.94879	0.1057	6.73687	NA	NA	4.05009	7.35396	0.2779	2.94879	0.2639	NA	NA	1726.52	123.963	125.213	1580.78	41.339	45.4721	1644.32	59.9544	61.4587	NA	NA	NA	4.7918	8.44159		1726.52	123.963	7.17991	125.213	7.84451
UK054	UK054_50	NA	2840	28030	94	0.720859	NA	NA	3.27869	3.34397	0.1063	7.07325	NA	NA	4.47028	7.82387	0.305	3.34397	0.20345	NA	NA	1736.91	130.012	131.202	1716.06	50.3824	54.3399	1725.47	65.0084	66.4521	NA	NA	NA	79.8542	1.20064		1736.91	130.012	7.48527	131.202	7.63125
UK054	UK054_164	NA	1850	17520	72.3	0.831991	NA	NA	3.27439	2.93143	0.1074	6.6222	NA	NA	4.52246	7.24202	0.3054	2.93143	0.42856	NA	NA	1755.76	121.398	122.665	1718.03	44.2109	48.6813	1735.11	60.2895	61.8488	NA	NA	NA	55.3913	2.1491		1755.76	121.398	6.91427	122.665	7.12296
UK054	UK054_108	NA	8440	81300	73.3	0.60082	NA	NA	3.29815	2.91581	0.1076	5.38392	NA	NA	4.49824	6.12279	0.3032	2.91581	0.66343	NA	NA	1759.17	98.5849	100.134	1707.16	43.7322	48.1995	1730.65	50.9051	52.7367	NA	NA	NA	23.5278	2.95646		1759.17	98.5849	5.60407	100.134	5.84468
UK054	UK054_177	NA	7540	73200	221	0.863281	NA	NA	3.25098	3.03685	0.1082	5.52206	NA	NA	4.58897	6.30203	0.3076	3.03685	0.57561	NA	NA	1769.33	100.994	102.504	1728.89	46.0533	50.4059	1747.27	52.5874	54.3753	NA	NA	NA	42.3747	2.28574		1769.33	100.994	5.70805	102.504	5.90789
UK054	UK054_139	NA	3070	29700	54.5	0.777461	NA	NA	3.22373	2.92221	0.1085	6.29079	NA	NA	4.64059	6.93638	0.3102	2.92221	0.080409	NA	NA	1774.38	115.032	116.36	1741.69	44.6005	49.1375	1756.6	58.0074	59.6407	NA	NA	NA	67.1984	1.84244		1774.38	115.032	6.48294	116.36	6.66052
UK054	UK054_209	NA	2600	25100	92.7	0.873704	NA	NA	3.14663	2.92827	0.1085	6.47387	NA	NA	4.75428	7.10533	0.3178	2.92827	0.12259	NA	NA	1774.38	118.393	119.685	1778.98	45.524	50.1367	1776.86	59.6771	61.2797	NA	NA	NA	95.2144	-0.258872		1774.38	118.393	6.67237	119.685	6.73055
UK054	UK054_203	NA	3420	33000	127.5	0.861486	NA	NA	3.09693	2.89435	0.1086	6.12507	NA	NA	4.83503	6.7745	0.3229	2.89435	0.34746	NA	NA	1776.06	111.967	113.33	1803.88	45.5426	50.2608	1791.01	57.0584	58.7414	NA	NA	NA	66.368	-1.56595		1776.06	111.967	6.30424	113.33	6.2978
UK054	UK054_54	NA	4410	42300	65.2	0.870494	NA	NA	3.14367	2.8958	0.1087	5.9403	NA	NA	4.76754	6.60854	0.3181	2.8958	0.3975	NA	NA	1777.74	108.555	109.959	1780.44	45.0515	49.7144	1779.2	55.5229	57.2424	NA	NA	NA	96.4497	-0.151898		1777.74	108.555	6.10635	109.959	6.17739
UK054	UK054_193	NA	2077	19090	61.6	0.92911	NA	NA	3.15657	2.91003	0.1097	6.61679	NA	NA	4.79174	7.22843	0.3168	2.91003	0.19664	NA	NA	1794.43	120.718	121.979	1774.08	45.1324	49.7602	1783.45	60.7962	62.3745	NA	NA	NA	78.3827	1.13405		1794.43	120.718	6.72737	121.979	6.86405
UK054	UK054_49	NA	1301	12510	29	0.810056	NA	NA	3.35683	3.00817	0.1107	7.26237	NA	NA	4.54694	7.86073	0.2979	3.00817	0.32166	NA	NA	1810.94	132.285	133.434	1680.89	44.5099	48.7937	1739.6	65.518	66.9597	NA	NA	NA	8.13826	7.18134		1810.94	132.285	7.30476	133.434	7.87898
UK054	UK054_167	NA	1868	17620	27	0.86262	NA	NA	3.18674	2.97968	0.111	6.68968	NA	NA	4.80261	7.32327	0.3138	2.97968	0.14082	NA	NA	1815.85	121.732	122.977	1759.38	45.8796	50.3763	1785.36	61.62	63.1791	NA	NA	NA	46.926	3.10998		1815.85	121.732	6.70387	122.977	6.95616
UK054	UK054_40	NA	4450	40400	55.2	0.817778	NA	NA	3.0303	2.90509	0.1111	5.91232	NA	NA	5.05509	6.5875	0.33	2.90509	0.44503	NA	NA	1817.49	107.514	108.918	1838.38	46.4673	51.2475	1828.6	55.8981	57.6403	NA	NA	NA	71.9075	-1.14965		1817.49	107.514	5.91555	108.918	5.93552
UK054	UK054_97	NA	2800	26600	62.5	0.897989	NA	NA	2.92654	2.91451	0.1111	6.28416	NA	NA	5.23432	6.92712	0.3417	2.91451	0.42797	NA	NA	1817.49	114.301	115.624	1894.84	47.8499	52.742	1858.22	59.1213	60.7905	NA	NA	NA	20.2766	-4.25619		1817.49	114.301	6.28897	115.624	6.14232
UK054	UK054_235	NA	808	7630	39.8	0.894382	NA	NA	3.0931	3.01931	0.1112	7.64683	NA	NA	4.95692	8.22133	0.3233	3.01931	0.068925	NA	NA	1819.12	139.186	140.278	1805.83	47.5534	52.0979	1812.01	69.5731	70.9744	NA	NA	NA	87.9527	0.730845		1819.12	139.186	7.65129	140.278	7.75998
UK054	UK054_55	NA	2100	19100	133	0.777778	NA	NA	3.22997	2.93967	0.1114	6.56474	NA	NA	4.7554	7.19288	0.3096	2.93967	0.25304	NA	NA	1822.38	119.354	120.62	1738.74	44.8009	49.3067	1777.06	60.4166	62.0003	NA	NA	NA	24.5589	4.58976		1822.38	119.354	6.54933	120.62	6.89233
UK054	UK054_162	NA	7100	66200	155	0.880682	NA	NA	3.21958	2.89292	0.1121	5.83884	NA	NA	4.80074	6.51621	0.3106	2.89292	-0.21243	NA	NA	1833.74	105.963	107.381	1743.66	44.1971	48.7801	1785.03	54.8115	56.5566	NA	NA	NA	28.7811	4.91234		1833.74	105.963	5.77852	107.381	6.09974
UK054	UK054_181	NA	3980	36500	150.1	0.883981	NA	NA	3.02663	2.91332	0.1122	6.02579	NA	NA	5.11133	6.6931	0.3304	2.91332	0.37438	NA	NA	1835.35	109.346	110.721	1840.32	46.6414	51.4136	1837.99	56.8996	58.6184	NA	NA	NA	93.648	-0.270605		1835.35	109.346	5.95776	110.721	6.01903
UK054	UK054_27	NA	1941	17630	25.5	0.817308	NA	NA	3.17259	2.94352	0.1141	6.69566	NA	NA	4.95876	7.3141	0.3152	2.94352	0.30856	NA	NA	1865.72	121.104	122.34	1766.24	45.4765	50.0389	1812.32	61.8793	63.4489	NA	NA	NA	15.7491	5.33153		1865.72	121.104	6.49102	122.34	6.87788
UK054	UK054_257	NA	1608	14780	46.5	1.05204	NA	NA	2.90782	3.00385	0.1141	6.94858	NA	NA	5.41027	7.57006	0.3439	3.00385	0.30195	NA	NA	1865.72	125.7	126.891	1905.4	49.553	54.3353	1886.48	64.9627	66.5026	NA	NA	NA	58.0263	-2.12723		1865.72	125.7	6.73733	126.891	6.68089
UK054	UK054_225	NA	1560	14150	62.5	0.925926	NA	NA	2.91121	2.95107	0.1145	6.94894	NA	NA	5.42292	7.54961	0.3435	2.95107	0.10321	NA	NA	1872.03	125.61	126.801	1903.49	48.6402	53.4962	1888.48	64.8104	66.3549	NA	NA	NA	69.5347	-1.68028		1872.03	125.61	6.70984	126.801	6.67993
UK054	UK054_133	NA	5890	52600	124	0.933032	NA	NA	2.9036	2.88641	0.1156	5.69132	NA	NA	5.48937	6.38142	0.3444	2.88641	0.21586	NA	NA	1889.26	102.586	104.031	1907.8	47.6671	52.6313	1898.93	54.8643	56.6845	NA	NA	NA	78.2729	-0.981713		1889.26	102.586	5.42998	104.031	5.46343
UK054	UK054_149	NA	2930	26700	89.1	0.862536	NA	NA	3.11139	2.92327	0.1156	6.29513	NA	NA	5.12277	6.94076	0.3214	2.92327	0.3667	NA	NA	1889.26	113.509	114.818	1796.56	45.836	50.4954	1839.89	59.0314	60.6915	NA	NA	NA	15.2583	4.9063		1889.26	113.509	6.00814	114.818	6.34664
UK054	UK054_119	NA	8640	78300	52.4	0.883642	NA	NA	3.12598	2.92721	0.1169	5.39948	NA	NA	5.1562	6.1419	0.3199	2.92721	0.56003	NA	NA	1909.36	97.077	98.5938	1789.24	45.7354	50.3727	1845.42	52.2797	54.1494	NA	NA	NA	1.64975	6.29093		1909.36	97.077	5.08428	98.5938	5.45681
UK054	UK054_67	NA	10730	93300	213	0.869388	NA	NA	2.84657	2.89588	0.117	5.24616	NA	NA	5.66716	5.99235	0.3513	2.89588	0.47792	NA	NA	1910.89	94.2959	95.8557	1940.8	48.5326	53.5555	1926.38	51.764	53.707	NA	NA	NA	57.3051	-1.56529		1910.89	94.2959	4.93465	95.8557	4.95542
UK054	UK054_169	NA	1750	15700	108	0.850394	NA	NA	2.95683	2.94736	0.1176	6.82802	NA	NA	5.48381	7.43699	0.3382	2.94736	0.24927	NA	NA	1920.07	122.706	123.91	1878	48.0189	52.8244	1898.06	63.9518	65.5217	NA	NA	NA	56.6552	2.1908		1920.07	122.706	6.39071	123.91	6.57618
UK054	UK054_263	NA	5460	49000	98.6	0.919776	NA	NA	2.83366	2.88452	0.1184	5.74181	NA	NA	5.76109	6.42564	0.3529	2.88452	0.4104	NA	NA	1932.22	102.97	104.395	1948.43	48.5049	53.5627	1940.58	55.6505	57.4719	NA	NA	NA	78.2137	-0.839153		1932.22	102.97	5.32913	104.395	5.36631
UK054	UK054_31	NA	6400	55200	50.3	0.874783	NA	NA	2.77855	2.91303	0.1196	5.62548	NA	NA	5.93491	6.33496	0.3599	2.91303	0.47305	NA	NA	1950.25	100.663	102.113	1981.7	49.6989	54.785	1966.36	55.1028	56.9574	NA	NA	NA	56.8692	-1.61239		1950.25	100.663	5.16153	102.113	5.16928
UK054	UK054_104	NA	3720	32300	143.5	0.937908	NA	NA	2.82566	2.89749	0.1214	6.07222	NA	NA	5.9238	6.7281	0.3539	2.89749	0.22586	NA	NA	1976.9	108.344	109.686	1953.19	48.8251	53.8729	1964.73	58.5138	60.2635	NA	NA	NA	73.1731	1.19926		1976.9	108.344	5.48051	109.686	5.60309
UK054	UK054_253	NA	4810	40800	99.2	0.954764	NA	NA	2.77855	2.89136	0.123	5.84107	NA	NA	6.10363	6.51751	0.3599	2.89136	0.22704	NA	NA	2000.19	103.924	105.314	1981.7	49.3291	54.4497	1990.77	56.9212	58.7331	NA	NA	NA	78.471	0.924565		2000.19	103.924	5.19569	105.314	5.30446
UK054	UK054_57	NA	1798	15120	73.8	1.03506	NA	NA	2.57533	2.9233	0.1242	6.69213	NA	NA	6.64952	7.30276	0.3883	2.9233	0.30497	NA	NA	2017.42	118.888	120.102	2114.94	52.709	58.0671	2065.94	64.5442	66.1868	NA	NA	NA	15.6054	-4.83377		2017.42	118.888	5.89307	120.102	5.72879
UK054	UK054_75	NA	3670	30590	279.8	1.02981	NA	NA	2.52461	2.93897	0.1245	6.11466	NA	NA	6.79948	6.7843	0.3961	2.93897	0.3829	NA	NA	2021.7	108.538	109.863	2151.06	53.7542	59.163	2085.65	60.1246	61.8934	NA	NA	NA	3.73225	-6.39852		2021.7	108.538	5.36864	109.863	5.1764
UK054	UK054_33	NA	3130	25700	85.5	0.982759	NA	NA	2.57069	2.95428	0.125	6.17183	NA	NA	6.70442	6.84246	0.389	2.95428	0.43618	NA	NA	2028.8	109.467	110.779	2118.19	53.3369	58.6507	2073.2	60.531	62.2821	NA	NA	NA	13.5507	-4.40617		2028.8	109.467	5.39564	110.779	5.27601
UK054	UK054_91	NA	9870	80700	429	0.924569	NA	NA	2.58331	3.00645	0.126	5.39084	NA	NA	6.72504	6.17251	0.3871	3.00645	0.4972	NA	NA	2042.89	95.4193	96.915	2109.36	54.0876	59.299	2075.92	54.6141	56.5485	NA	NA	NA	21.7869	-3.25382		2042.89	95.4193	4.6708	96.915	4.6318
UK054	UK054_127	NA	1304	10670	36.9	0.911111	NA	NA	2.73673	3.00531	0.1265	7.19207	NA	NA	6.37324	7.79472	0.3654	3.00531	0.075902	NA	NA	2049.89	127.334	128.462	2007.72	51.8472	56.8463	2028.59	68.5158	70.0492	NA	NA	NA	61.4949	2.05726		2049.89	127.334	6.21177	128.462	6.3753
UK054	UK054_60	NA	3230	25440	52.2	0.998088	NA	NA	2.62398	2.9107	0.13	6.22248	NA	NA	6.83099	6.8696	0.3811	2.9107	0.25888	NA	NA	2097.96	109.501	110.793	2081.42	51.7772	57.0841	2089.75	60.9185	62.6672	NA	NA	NA	80.9327	0.788517		2097.96	109.501	5.2194	110.793	5.31466
UK054	UK054_14	NA	6720	51900	255	0.980769	NA	NA	2.67881	2.9382	0.1306	5.59399	NA	NA	6.72206	6.31869	0.3733	2.9382	0.49625	NA	NA	2106.05	98.3176	99.7498	2044.91	51.4875	56.6708	2075.53	55.9068	57.7982	NA	NA	NA	25.9138	2.90299		2106.05	98.3176	4.66835	99.7498	4.84872
UK054	UK054_140	NA	5660	43900	62.8	1.11348	NA	NA	2.42718	2.91249	0.1335	5.73149	NA	NA	7.58368	6.42904	0.412	2.91249	0.2358	NA	NA	2144.51	100.309	101.701	2224.06	54.7842	60.3927	2182.93	57.7364	59.6245	NA	NA	NA	23.4676	-3.70947		2144.51	100.309	4.67747	101.701	4.61366
UK054	UK054_100	NA	5010	32000	101.1	1.24201	NA	NA	2.08855	2.89894	0.1598	5.83404	NA	NA	10.5495	6.51459	0.4788	2.89894	0.28065	NA	NA	2453.55	98.8121	100.136	2522.04	60.5083	66.7582	2484.28	60.4922	62.42	NA	NA	NA	29.595	-2.79152		2453.55	98.8121	4.02732	100.136	4.00119
UK054	UK054_230	NA	6290	39310	165	1.13246	NA	NA	2.13767	2.99882	0.1659	5.81602	NA	NA	10.7006	6.54362	0.4678	2.99882	0.35505	NA	NA	2516.7	97.8843	99.2042	2473.91	61.6134	67.579	2497.48	60.837	62.7589	NA	NA	NA	49.8589	1.70037		2516.7	97.8843	3.88939	99.2042	3.99093
UK054	UK054_105	NA	2790	16820	55.4	1.17622	NA	NA	2.08247	2.9666	0.1672	6.35516	NA	NA	11.0703	7.01347	0.4802	2.9666	0.36841	NA	NA	2529.81	106.85	108.059	2528.14	62.0429	68.1753	2529.06	65.404	67.2069	NA	NA	NA	97.9347	0.0660549		2529.81	106.85	4.22365	108.059	4.27353
UK054	UK054_187	NA	3460	21220	176	1.11041	NA	NA	2.07469	3.05534	0.171	6.26321	NA	NA	11.3643	6.96871	0.482	3.05534	0.23216	NA	NA	2567.45	104.91	106.131	2535.97	64.0607	70.0455	2553.5	65.1254	66.9434	NA	NA	NA	66.1768	1.22626		2567.45	104.91	4.08614	106.131	4.17106
UK054	UK054_81	NA	7860	44900	272	1.24771	NA	NA	2.08203	2.92173	0.1779	5.52594	NA	NA	11.7812	6.2508	0.4803	2.92173	0.38233	NA	NA	2633.39	91.9369	93.3088	2528.57	61.1132	67.332	2587.17	58.5686	60.593	NA	NA	NA	7.96309	3.98034		2633.39	91.9369	3.4912	93.3088	3.64683
UK054	UK054_111	NA	6610	37300	34.5	1.02374	NA	NA	1.90985	2.95457	0.1802	5.72097	NA	NA	13.0094	6.43887	0.5236	2.95457	-0.034651	NA	NA	2654.71	94.9975	96.321	2714.43	65.457	71.9773	2680.33	60.7848	62.7671	NA	NA	NA	45.1391	-2.24951		2654.71	94.9975	3.57845	96.321	3.57284
UK054	UK054_65	NA	5070	28310	115.4	1.12148	NA	NA	1.86916	3.07642	0.181	6.3174	NA	NA	13.3516	7.02666	0.535	3.07642	-0.044162	NA	NA	2662.05	104.861	106.061	2762.48	69.1236	75.4971	2704.84	66.4709	68.2966	NA	NA	NA	23.6639	-3.77265		2662.05	104.861	3.9391	106.061	3.88232
UK054	UK054_80	NA	14740	81500	244	1.29101	NA	NA	1.85563	2.94647	0.1823	5.12831	NA	NA	13.5455	5.9145	0.5389	2.94647	0.26638	NA	NA	2673.91	84.9778	86.4478	2778.84	66.517	73.1778	2718.47	55.9827	58.1394	NA	NA	NA	10.4866	-3.92443		2673.91	84.9778	3.17804	86.4478	3.15418
UK054	UK054_250	NA	9260	51900	189.9	1.14191	NA	NA	2.02675	2.90102	0.185	5.38363	NA	NA	12.5855	6.11551	0.4934	2.90102	0.3362	NA	NA	2698.21	89.0151	90.4138	2585.37	61.7881	68.1615	2649.14	57.5867	59.6645	NA	NA	NA	6.52252	4.18216		2698.21	89.0151	3.29904	90.4138	3.45183
UK054	UK054_92	NA	6150	34300	392	1.31544	NA	NA	1.9279	2.91851	0.1888	5.66425	NA	NA	13.5027	6.37193	0.5187	2.91851	0.57224	NA	NA	2731.74	93.3752	94.7019	2693.66	64.2597	70.8125	2715.47	60.3091	62.3167	NA	NA	NA	45.0261	1.39369		2731.74	93.3752	3.41816	94.7019	3.49976
UK054	UK054_121	NA	4750	25500	155	1.24398	NA	NA	1.93798	3.79306	0.1926	6.09763	NA	NA	13.7027	7.18111	0.516	3.79306	0.6891	NA	NA	2764.49	100.238	101.469	2682.19	83.2306	88.3541	2729.38	68.0582	69.8492	NA	NA	NA	12.2741	2.97697		2764.49	100.238	3.62591	101.469	3.73133
UK054	UK054_136	NA	1780	8980	331	1.43913	NA	NA	1.79856	3.09032	0.2042	6.74142	NA	NA	15.6542	7.41598	0.556	3.09032	0.5344	NA	NA	2860.06	109.906	111.012	2850.08	71.1876	77.695	2855.93	70.8942	72.6454	NA	NA	NA	86.4377	0.349134		2860.06	109.906	3.84278	111.012	3.89103
UK054	UK054_3	NA	41500	177000	833	1.4875	NA	NA	1.66334	2.88692	0.235	4.35834	NA	NA	19.48	5.22776	0.6012	2.88692	0.60593	NA	NA	3086.42	69.6087	71.2694	3034.67	69.8784	77.1537	3065.9	50.5316	53.0096	NA	NA	NA	26.5598	1.67659		3086.42	69.6087	2.25532	71.2694	2.32785
UK054	UK054_5	NA	2380	31080	197.9	0.475721	NA	NA	6.96864	3.00506	0.0785	6.45854	NA	NA	1.55318	7.12342	0.1435	3.00506	0.65268	NA	NA	1159.56	128.358	129.765	864.424	24.3102	26.6545	951.76	44.0282	45.2033	NA	NA	NA	8.33422e-05	25.4522
UK054	UK054_6	NA	10040	59600	246	1.17143	NA	NA	2.53357	2.99694	0.1713	5.29217	NA	NA	9.32236	6.08184	0.3947	2.99694	0.62321	NA	NA	2570.39	88.5756	90.0155	2144.59	54.6756	59.9756	2370.22	55.8276	57.8636	NA	NA	NA	1.59619e-17	16.5655
UK054	UK054_10	NA	1143	19240	55.2	0.2208	NA	NA	14.8588	2.93825	0.0622	7.26179	NA	NA	0.577174	7.8337	0.0673	2.93825	0.18166	NA	NA	NA	NA	NA	419.868	11.9436	13.1459	462.644	29.1168	29.7603	NA	NA	NA	0.422677	38.3446
UK054	UK054_12	NA	2140	31900	260	0.268873	NA	NA	10.5152	2.94363	0.0676	6.65052	NA	NA	0.886397	7.27285	0.0951	2.94363	0.092764	NA	NA	856.315	138.449	139.882	585.629	16.4789	18.132	644.432	34.7136	35.6024	NA	NA	NA	0.185115	31.6105
UK054	UK054_23	NA	8400	76800	208	0.750903	NA	NA	3.47705	2.892	0.1126	5.42489	NA	NA	4.46507	6.14761	0.2876	2.892	0.48964	NA	NA	1841.8	98.332	99.8543	1629.52	41.6419	45.9627	1724.5	51.0428	52.8647	NA	NA	NA	0.00936584	11.5253
UK054	UK054_26	NA	10830	110400	336	0.591549	NA	NA	4.23729	2.94996	0.099	5.24408	NA	NA	3.22143	6.01686	0.236	2.94996	0.61316	NA	NA	1605.37	97.9157	99.5369	1365.87	36.3106	39.9382	1462.33	46.6546	48.3913	NA	NA	NA	7.09551e-05	14.9185
UK054	UK054_28	NA	7580	60900	185	0.902439	NA	NA	2.90613	2.90551	0.1273	5.50783	NA	NA	6.03969	6.22721	0.3441	2.90551	0.46071	NA	NA	2061.02	97.294	98.7555	1906.36	47.9515	52.883	1981.58	54.2998	56.1901	NA	NA	NA	0.542007	7.5038
UK054	UK054_29	NA	8480	79200	253	0.658854	NA	NA	3.88048	2.89333	0.1117	5.39981	NA	NA	3.96889	6.12612	0.2577	2.89333	0.39373	NA	NA	1827.26	98.0498	99.5817	1478.06	38.2172	42.1791	1627.86	49.7247	51.5117	NA	NA	NA	5.35698e-07	19.1103
UK054	UK054_45	NA	11910	104100	300	0.793651	NA	NA	3.25098	2.88163	0.1177	5.14265	NA	NA	4.99188	5.89497	0.3076	2.88163	0.28265	NA	NA	1921.59	92.3131	93.9015	1728.89	43.6993	48.2647	1817.95	49.9071	51.8414	NA	NA	NA	0.181581	10.0285
UK054	UK054_46	NA	6760	68800	310	0.651261	NA	NA	4.0833	2.97761	0.1018	5.56452	NA	NA	3.43746	6.3111	0.2449	2.97761	0.65526	NA	NA	1657.2	103.223	104.743	1412.12	37.7611	41.467	1513	49.6803	51.3643	NA	NA	NA	3.1114e-05	14.7886
UK054	UK054_47	NA	671	5890	25	0.932836	NA	NA	2.63158	3.07893	0.1141	7.87189	NA	NA	5.9782	8.4526	0.38	3.07893	0.31138	NA	NA	1865.72	142.496	143.551	2076.28	54.6553	59.6868	1972.68	73.656	75.0608	NA	NA	NA	0.572571	-11.2861
UK054	UK054_77	NA	3550	29300	122	0.982287	NA	NA	3.34784	2.93523	0.1259	6.12856	NA	NA	5.18516	6.7952	0.2987	2.93523	0.29116	NA	NA	2041.49	108.538	109.857	1684.86	43.5204	47.9101	1850.18	57.9047	59.6026	NA	NA	NA	2.4318e-05	17.4691
UK054	UK054_78	NA	3100	31400	99	0.630573	NA	NA	5.7971	2.98679	0.1023	6.23426	NA	NA	2.43313	6.91281	0.1725	2.98679	0.57558	NA	NA	1666.27	115.558	116.917	1025.87	28.3271	31.0908	1252.45	49.786	51.1964	NA	NA	NA	5.54469e-21	38.433
UK054	UK054_83	NA	595	10030	44.4	0.104965	NA	NA	26.738	3.08616	0.0582	8.04313	NA	NA	0.300121	8.61489	0.0374	3.08616	0.39912	NA	NA	NA	NA	NA	236.697	7.17236	7.82963	266.494	20.1952	20.5649	NA	NA	NA	0.154273	55.9469
UK054	UK054_102	NA	262	4710	21.3	0.110938	NA	NA	25.227	3.03656	0.0596	9.91022	NA	NA	0.325748	10.365	0.03964	3.03656	0.15599	NA	NA	NA	NA	NA	250.601	7.46365	8.16916	286.314	25.865	26.1931	NA	NA	NA	0.639669	57.4591
UK054	UK054_128	NA	488	11160	30.8	0.127273	NA	NA	24.3072	2.90378	0.0448	8.46066	NA	NA	0.254123	8.9451	0.04114	2.90378	0.24837	NA	NA	NA	NA	NA	259.895	7.39669	8.15822	229.92	18.4063	18.719	NA	NA	NA	0.0767111	490.714
UK054	UK054_134	NA	1850	26200	23.3	0.455078	NA	NA	8.48176	2.94522	0.0721	6.69292	NA	NA	1.17206	7.31228	0.1179	2.94522	0.2751	NA	NA	988.765	136.491	137.885	718.465	20.0239	22.0305	787.609	40.0855	41.1012	NA	NA	NA	0.0667309	27.3371
UK054	UK054_147	NA	137	3770	9.7	0.0781628	NA	NA	38.1679	3.02992	0.0375	11.6842	NA	NA	0.135467	12.0706	0.0262	3.02992	0.013199	NA	NA	NA	NA	NA	166.721	4.98676	5.46012	128.998	14.6234	14.7604	NA	NA	NA	6.45749e-05	132.03
UK054	UK054_175	NA	7750	77000	95.7	0.736154	NA	NA	3.96511	2.90558	0.103	5.51377	NA	NA	3.58165	6.2325	0.2522	2.90558	0.49462	NA	NA	1678.87	101.996	103.525	1449.81	37.7248	41.6043	1545.47	49.5105	51.2306	NA	NA	NA	0.00357046	13.6437
UK054	UK054_176	NA	562	5740	20.9	0.743772	NA	NA	7.6746	3.35724	0.1024	8.15211	NA	NA	1.83969	8.81635	0.1303	3.35724	0.40344	NA	NA	1668.07	151.278	152.324	789.577	24.949	26.8937	1059.75	58.0585	59.0756	NA	NA	NA	5.07684e-17	52.6654
UK054	UK054_179	NA	1730	30000	12	0.203046	NA	NA	16.9924	2.92696	0.0601	6.75159	NA	NA	0.487666	7.35874	0.05885	2.92696	0.26181	NA	NA	NA	NA	NA	368.628	10.4869	11.5503	403.319	24.4982	25.1109	NA	NA	NA	0.436992	39.2882
UK054	UK054_240	NA	1530	22290	18.5	0.417607	NA	NA	10.7181	2.924	0.0699	7.06005	NA	NA	0.899208	7.6416	0.0933	2.924	-0.011724	NA	NA	925.417	145.434	146.772	575.024	16.0856	17.72	651.304	36.7529	37.6064	NA	NA	NA	0.0225204	37.8632
University of Calgary, Centre for Pure and Applied Tectonics and Thermochronology
Cut Bank Mb 2 ( 47.251692°, -111.420967°)		f206c	207Pb CPS	206Pb CPS	U (ppm)1	U/Th	206Pb/204Pb	1σ %	Data for Tera-Wasserburg plot2				208Pb/206Pb	2σx (%)	Data for Wetherill plot2					208Pb/232Th	2σx (%)	Dates									208Pb/232Th	2σx (ABS)	2σtotal (ABS)	Prob. Conc. (%)	% conc3	Comments	Accepted Dates4
Sample	Spot								238U/206Pb	2σx (%)	207Pb/206Pb	2σx (%)			207Pb/235Pb	2σx (%)	206Pb/238U	2σx (%)	Rho			207Pb/206Pb	2σx (ABS)	2σtotal (ABS)	206Pb/238U	2σx (ABS)	2σtotal (ABS)	207Pb/235Pb	2σx (ABS)	2σtotal (ABS)							Date (Ma)	2σx (ABS)	2σx (%)	2σtotal (ABS)	2σtotal (%)
UK053	UK053_3	NA	552	12500	27.7	0.0625282	NA	NA	43.6872	2.58225	0.0492	8.33459	NA	NA	0.155279	8.72544	0.02289	2.58225	-0.067862	NA	NA	NA	NA	NA	145.895	3.72506	4.20418	146.562	11.9087	12.1212	NA	NA	NA	91.6451	NA		145.895	3.72506	2.55325	4.20418	2.88028
UK053	UK053_41	NA	412	9960	20.7	0.0739286	NA	NA	41.2201	2.56917	0.0471	8.91257	NA	NA	0.157548	9.27548	0.02426	2.56917	-3.6064e-05	NA	NA	NA	NA	NA	154.523	3.92276	4.43216	148.555	12.8193	13.0219	NA	NA	NA	37.2047	NA		154.523	3.92276	2.53862	4.43216	2.87788
UK053	UK053_251	NA	541	11800	36.4	0.0723658	NA	NA	40.3714	2.58355	0.0503	8.25552	NA	NA	0.171789	8.65034	0.02477	2.58355	0.16866	NA	NA	NA	NA	NA	157.732	4.02565	4.54293	160.97	12.8775	13.1113	NA	NA	NA	61.4145	NA		157.732	4.02565	2.5522	4.54293	2.8775
UK053	UK053_148	NA	1270	27900	39.1	0.0778884	NA	NA	40.0962	2.5578	0.0498	7.25562	NA	NA	0.171249	7.69327	0.02494	2.5578	0.076528	NA	NA	NA	NA	NA	158.801	4.01221	4.5376	160.502	11.4219	11.6834	NA	NA	NA	77.3558	NA		158.801	4.01221	2.52655	4.5376	2.85465
UK053	UK053_90	NA	828	18280	24.2	0.0733333	NA	NA	40.0641	2.57365	0.049	7.61229	NA	NA	0.168633	8.03558	0.02496	2.57365	0.012329	NA	NA	NA	NA	NA	158.927	4.04022	4.56316	158.232	11.7742	12.0215	NA	NA	NA	91.0655	NA		158.927	4.04022	2.54218	4.56316	2.87251
UK053	UK053_22	NA	1081	23700	5.55	0.0764463	NA	NA	39.968	2.56514	0.0492	7.31762	NA	NA	0.169728	7.75419	0.02502	2.56514	0.021161	NA	NA	NA	NA	NA	159.305	4.0363	4.56201	159.183	11.4249	11.6825	NA	NA	NA	98.387	NA		159.305	4.0363	2.5337	4.56201	2.86393
UK053	UK053_121	NA	693	15460	25.6	0.0735632	NA	NA	39.9202	2.56109	0.0489	7.89511	NA	NA	0.168895	8.30011	0.02505	2.56109	-0.10178	NA	NA	NA	NA	NA	159.493	4.03465	4.5617	158.46	12.178	12.418	NA	NA	NA	87.565	NA		159.493	4.03465	2.52967	4.5617	2.86238
UK053	UK053_176	NA	1001	21560	8.1	0.0764151	NA	NA	39.8724	2.55717	0.0511	7.41332	NA	NA	0.176705	7.84197	0.02508	2.55717	0.33384	NA	NA	NA	NA	NA	159.682	4.03319	4.56157	165.222	11.958	12.2216	NA	NA	NA	32.6949	NA		159.682	4.03319	2.52576	4.56157	2.8566
UK053	UK053_33	NA	1046	22450	34.8	0.0768042	NA	NA	39.1389	2.57037	0.0509	7.72983	NA	NA	0.179312	8.14599	0.02555	2.57037	-0.052448	NA	NA	NA	NA	NA	162.637	4.12808	4.66367	167.469	12.577	12.8342	NA	NA	NA	47.3	NA		162.637	4.12808	2.53822	4.66367	2.85829
UK053	UK053_243	NA	960	21800	16.4	0.0807882	NA	NA	38.8199	2.59047	0.0482	7.40848	NA	NA	0.171196	7.84832	0.02576	2.59047	0.48961	NA	NA	NA	NA	NA	163.957	4.1937	4.72987	160.457	11.649	11.9054	NA	NA	NA	49.4559	NA		163.957	4.1937	2.55781	4.72987	2.88116
UK053	UK053_109	NA	1545	34660	51.6	0.0728814	NA	NA	38.6698	2.54078	0.0477	6.95048	NA	NA	0.170078	7.40032	0.02586	2.54078	0.091024	NA	NA	NA	NA	NA	164.585	4.12882	4.67632	159.487	10.9227	11.1928	NA	NA	NA	36.6703	NA		164.585	4.12882	2.50862	4.67632	2.85026
UK053	UK053_237	NA	99	2020	1.64	0.127428	NA	NA	38.2555	2.79399	0.0504	12.2723	NA	NA	0.181651	12.5864	0.02614	2.79399	-0.070772	NA	NA	NA	NA	NA	166.344	4.5882	5.09654	169.48	19.6487	19.818	NA	NA	NA	75.9856	NA		166.344	4.5882	2.75825	5.09654	3.06009
UK053	UK053_249	NA	573	13100	14.5	0.0747423	NA	NA	37.9219	2.58218	0.0481	8.1518	NA	NA	0.174887	8.55099	0.02637	2.58218	0.10097	NA	NA	NA	NA	NA	167.789	4.27672	4.82682	163.651	12.925	13.1651	NA	NA	NA	52.9841	NA		167.789	4.27672	2.54886	4.82682	2.88194
UK053	UK053_10	NA	187	3980	6.21	0.107812	NA	NA	30.4229	2.685	0.0505	10.1759	NA	NA	0.228872	10.5241	0.03287	2.685	0.21011	NA	NA	NA	NA	NA	208.486	5.50829	6.16641	209.267	19.9048	20.1497	NA	NA	NA	93.6165	NA		208.486	5.50829	2.64205	6.16641	2.9575
UK053	UK053_190	NA	894	18920	24.21	0.106699	NA	NA	27.8242	2.56802	0.0517	7.48038	NA	NA	0.256195	7.9089	0.03594	2.56802	0.19547	NA	NA	NA	NA	NA	227.618	5.74329	6.48973	231.596	16.3794	16.7345	NA	NA	NA	62.5299	NA		227.618	5.74329	2.52321	6.48973	2.84843
UK053	UK053_65	NA	356	7650	8.42	0.112869	NA	NA	27.2702	2.64583	0.0518	8.96203	NA	NA	0.261904	9.34443	0.03667	2.64583	0.061585	NA	NA	NA	NA	NA	232.159	6.03324	6.77441	236.2	19.6949	20.0017	NA	NA	NA	69.0126	NA		232.159	6.03324	2.59876	6.77441	2.91442
UK053	UK053_49	NA	253	5290	14.36	0.114605	NA	NA	27.1665	2.69558	0.0525	9.536	NA	NA	0.266457	9.90966	0.03681	2.69558	0.21527	NA	NA	NA	NA	NA	233.029	6.16933	6.90096	239.857	21.1733	21.4668	NA	NA	NA	51.1589	NA		233.029	6.16933	2.64744	6.90096	2.95946
UK053	UK053_64	NA	340	6790	8.92	0.111083	NA	NA	27.0124	2.63547	0.0558	9.16757	NA	NA	0.284821	9.53887	0.03702	2.63547	-0.095152	NA	NA	NA	NA	NA	234.335	6.06494	6.81554	254.475	21.4744	21.7956	NA	NA	NA	8.05107	NA		234.335	6.06494	2.58815	6.81554	2.88559
UK053	UK053_58	NA	588	12660	17.5	0.108225	NA	NA	26.6596	2.57909	0.0505	8.10881	NA	NA	0.26118	8.50909	0.03751	2.57909	-0.083914	NA	NA	NA	NA	NA	237.38	6.0109	6.78581	235.617	17.8945	18.2302	NA	NA	NA	85.5298	NA		237.38	6.0109	2.53218	6.78581	2.86119
UK053	UK053_96	NA	1162	24900	21.5	0.110256	NA	NA	26.5111	2.56984	0.0511	7.33974	NA	NA	0.265763	7.77662	0.03772	2.56984	0.087771	NA	NA	NA	NA	NA	238.685	6.02165	6.80323	239.3	16.5806	16.9523	NA	NA	NA	94.2765	NA		238.685	6.02165	2.52285	6.80323	2.84961
UK053	UK053_150	NA	446	9610	15.63	0.106835	NA	NA	26.295	2.65111	0.0483	8.67201	NA	NA	0.253265	9.06819	0.03803	2.65111	-0.098153	NA	NA	NA	NA	NA	240.61	6.26127	7.02755	229.225	18.6093	18.917	NA	NA	NA	25.7731	NA		240.61	6.26127	2.60224	7.02755	2.93815
UK053	UK053_248	NA	1103	23430	28.5	0.107143	NA	NA	26.2674	2.75683	0.0506	7.48496	NA	NA	0.265604	7.97651	0.03807	2.75683	0.29087	NA	NA	NA	NA	NA	240.859	6.51756	7.25826	239.173	16.9989	17.3613	NA	NA	NA	83.6384	NA		240.859	6.51756	2.70597	7.25826	3.01431
UK053	UK053_259	NA	1297	25960	55.6	0.110099	NA	NA	26.0824	2.54597	0.0547	7.11998	NA	NA	0.289162	7.56149	0.03834	2.54597	1.5025e-05	NA	NA	NA	NA	NA	242.535	6.06017	6.8607	257.899	17.2231	17.6312	NA	NA	NA	9.43113	NA		242.535	6.06017	2.49868	6.8607	2.80949
UK053	UK053_119	NA	811	17790	50.3	0.112277	NA	NA	26.001	2.56465	0.0497	7.59372	NA	NA	0.263552	8.01511	0.03846	2.56465	0.054917	NA	NA	NA	NA	NA	243.28	6.12302	6.92079	237.526	16.9767	17.3352	NA	NA	NA	51.5208	NA		243.28	6.12302	2.51686	6.92079	2.85166
UK053	UK053_98	NA	361	7840	19.3	0.112536	NA	NA	25.8799	2.62469	0.0507	9.10486	NA	NA	0.270114	9.47563	0.03864	2.62469	0.1289	NA	NA	NA	NA	NA	244.398	6.29459	7.07968	242.784	20.4645	20.7746	NA	NA	NA	87.5575	NA		244.398	6.29459	2.57556	7.07968	2.89783
UK053	UK053_131	NA	348	7280	13.3	0.109465	NA	NA	25.355	2.63013	0.0529	9.33815	NA	NA	0.28767	9.70148	0.03944	2.63013	0.10947	NA	NA	NA	NA	NA	249.361	6.4333	7.23255	256.723	22.0103	22.3286	NA	NA	NA	50.9322	NA		249.361	6.4333	2.57992	7.23255	2.89602
UK053	UK053_68	NA	1032	21690	28.4	0.11721	NA	NA	25.0376	2.56006	0.0522	7.39819	NA	NA	0.287462	7.82861	0.03994	2.56006	0.14483	NA	NA	NA	NA	NA	252.461	6.33825	7.16685	256.559	17.7502	18.1429	NA	NA	NA	64.8695	NA		252.461	6.33825	2.51058	7.16685	2.83541
UK053	UK053_153	NA	371	6970	9.19	0.118123	NA	NA	25.0188	2.66307	0.0581	8.87423	NA	NA	0.320193	9.2652	0.03997	2.66307	0.12948	NA	NA	NA	NA	NA	252.647	6.59804	7.39869	282.051	22.8209	23.1825	NA	NA	NA	1.13238	NA		252.647	6.59804	2.61156	7.39869	2.91389
UK053	UK053_102	NA	692	13130	17.7	0.124298	NA	NA	24.5158	2.58553	0.0561	7.96993	NA	NA	0.315513	8.37883	0.04079	2.58553	0.10451	NA	NA	NA	NA	NA	257.728	6.53219	7.37036	278.445	20.4077	20.8024	NA	NA	NA	4.79515	NA		257.728	6.53219	2.53453	7.37036	2.84505
UK053	UK053_227	NA	556	11380	14.1	0.119492	NA	NA	23.8663	2.65598	0.055	8.19187	NA	NA	0.317744	8.61168	0.0419	2.65598	0.32	NA	NA	NA	NA	NA	264.599	6.88542	7.72517	280.166	21.0876	21.4739	NA	NA	NA	12.1944	NA		264.599	6.88542	2.60221	7.72517	2.91948
UK053	UK053_8	NA	578	12230	15.9	0.120455	NA	NA	23.7135	2.59937	0.0522	8.24978	NA	NA	0.303512	8.6496	0.04217	2.59937	-0.053117	NA	NA	NA	NA	NA	266.27	6.78035	7.64164	269.139	20.4524	20.8239	NA	NA	NA	79.3337	NA		266.27	6.78035	2.54642	7.64164	2.86646
UK053	UK053_193	NA	513	10410	14.5	0.127753	NA	NA	23.4962	2.5948	0.0515	8.31042	NA	NA	0.302211	8.70609	0.04256	2.5948	0.11166	NA	NA	NA	NA	NA	268.682	6.82845	7.69874	268.126	20.5183	20.8861	NA	NA	NA	95.7534	NA		268.682	6.82845	2.54147	7.69874	2.8658
UK053	UK053_95	NA	124	2310	7.57	0.132343	NA	NA	23.4742	2.89891	0.0524	11.611	NA	NA	0.307781	11.9674	0.0426	2.89891	-0.040889	NA	NA	NA	NA	NA	268.929	7.63563	8.42428	272.46	28.6056	28.8782	NA	NA	NA	81.3566	NA		268.929	7.63563	2.83927	8.42428	3.12945
UK053	UK053_71	NA	670	13060	12.78	0.129352	NA	NA	23.1374	2.592	0.0542	7.94738	NA	NA	0.322987	8.35938	0.04322	2.592	0.081901	NA	NA	NA	NA	NA	272.761	6.92249	7.80656	284.198	20.725	21.1277	NA	NA	NA	28.5256	NA		272.761	6.92249	2.53793	7.80656	2.85268
UK053	UK053_55	NA	105	2210	6.08	0.150868	NA	NA	21.4592	2.93264	0.0512	11.6663	NA	NA	0.328971	12.0292	0.0466	2.93264	0.16959	NA	NA	NA	NA	NA	293.614	8.41748	9.26791	288.78	30.2439	30.5292	NA	NA	NA	74.6529	NA		293.614	8.41748	2.86686	9.26791	3.15812
UK053	UK053_13	NA	2020	44400	16.9	0.135092	NA	NA	20.9118	2.55486	0.0508	6.55351	NA	NA	0.334946	7.03391	0.04782	2.55486	0.21182	NA	NA	NA	NA	NA	301.124	7.51638	8.50277	293.335	17.9218	18.4117	NA	NA	NA	38.2744	NA		301.124	7.51638	2.49611	8.50277	2.83017
UK053	UK053_246	NA	2010	41700	120	0.13809	NA	NA	20.7211	2.65057	0.0519	6.73789	NA	NA	0.345347	7.24049	0.04826	2.65057	0.242	NA	NA	NA	NA	NA	303.83	7.86641	8.8295	301.216	18.8742	19.3615	NA	NA	NA	77.8438	NA		303.83	7.86641	2.58908	8.8295	2.90795
UK053	UK053_179	NA	388	7330	27.6	0.143451	NA	NA	20.5846	2.60915	0.0588	8.87774	NA	NA	0.393855	9.25321	0.04858	2.60915	-0.17756	NA	NA	NA	NA	NA	305.798	7.79243	8.77529	337.181	26.5546	26.9765	NA	NA	NA	3.22765	NA		305.798	7.79243	2.54823	8.77529	2.83671
UK053	UK053_174	NA	1640	33000	76.4	0.1629	NA	NA	20.4082	2.66143	0.0533	7.37678	NA	NA	0.360101	7.8422	0.049	2.66143	-0.1222	NA	NA	NA	NA	NA	308.379	8.0141	8.98772	312.29	21.0855	21.5504	NA	NA	NA	73.9072	NA		308.379	8.0141	2.59878	8.98772	2.90883
UK053	UK053_137	NA	1182	24710	55	0.138539	NA	NA	20.3252	2.58016	0.0534	7.23884	NA	NA	0.362249	7.68492	0.0492	2.58016	0.098095	NA	NA	NA	NA	NA	309.608	7.7996	8.80432	313.893	20.753	21.2293	NA	NA	NA	68.9889	NA		309.608	7.7996	2.51918	8.80432	2.83988
UK053	UK053_124	NA	224	4210	15.26	0.150345	NA	NA	19.685	2.71382	0.0579	9.67966	NA	NA	0.405549	10.0529	0.0508	2.71382	0.11141	NA	NA	NA	NA	NA	319.431	8.45753	9.44779	345.665	29.4605	29.8576	NA	NA	NA	8.10345	NA		319.431	8.45753	2.64768	9.44779	2.9463
UK053	UK053_211	NA	1636	32200	43.3	0.132416	NA	NA	19.6812	2.61751	0.0554	6.94072	NA	NA	0.388115	7.41788	0.05081	2.61751	0.29972	NA	NA	NA	NA	NA	319.493	8.15889	9.18177	332.991	21.0624	21.5808	NA	NA	NA	18.3559	NA		319.493	8.15889	2.5537	9.18177	2.86965
UK053	UK053_169	NA	427	9160	19.9	0.141235	NA	NA	19.4704	2.61005	0.0509	8.4345	NA	NA	0.360449	8.82911	0.05136	2.61005	0.047651	NA	NA	NA	NA	NA	322.866	8.21942	9.25546	312.55	23.7568	24.171	NA	NA	NA	40.2775	NA		322.866	8.21942	2.54577	9.25546	2.87551
UK053	UK053_160	NA	685	13860	29.2	0.149974	NA	NA	19.4628	2.58209	0.0543	7.98479	NA	NA	0.384676	8.39191	0.05138	2.58209	0.0162	NA	NA	NA	NA	NA	322.988	8.13438	9.18075	330.473	23.6764	24.133	NA	NA	NA	54.9015	NA		322.988	8.13438	2.51847	9.18075	2.83582
UK053	UK053_170	NA	886	17750	18.4	0.156863	NA	NA	19.4326	2.57759	0.0534	7.6531	NA	NA	0.378889	8.07551	0.05146	2.57759	-0.15078	NA	NA	NA	NA	NA	323.479	8.13222	9.18177	326.221	22.5348	23.0037	NA	NA	NA	82.7111	NA		323.479	8.13222	2.51399	9.18177	2.83487
UK053	UK053_84	NA	957	19700	54.8	0.164565	NA	NA	17.8571	2.67735	0.0545	7.53884	NA	NA	0.42081	8.00014	0.056	2.67735	0.42349	NA	NA	NA	NA	NA	351.253	9.15266	10.2521	356.63	24.0635	24.5736	NA	NA	NA	62.3104	NA		351.253	9.15266	2.60571	10.2521	2.91966
UK053	UK053_75	NA	1040	19930	60.9	0.173011	NA	NA	17.2921	2.55218	0.0561	7.44216	NA	NA	0.447319	7.86762	0.05783	2.55218	0.073287	NA	NA	NA	NA	NA	362.415	8.99428	10.177	375.4	24.6952	25.2363	NA	NA	NA	31.3835	NA		362.415	8.99428	2.48176	10.177	2.79843
UK053	UK053_172	NA	700	13890	25	0.166556	NA	NA	17.1527	2.59194	0.0556	7.96939	NA	NA	0.446935	8.3803	0.0583	2.59194	-0.010762	NA	NA	NA	NA	NA	365.279	9.20458	10.3801	375.131	26.2895	26.7979	NA	NA	NA	48.2364	NA		365.279	9.20458	2.51988	10.3801	2.83325
UK053	UK053_222	NA	611	12340	38	0.161017	NA	NA	16.9434	2.58589	0.0535	8.16835	NA	NA	0.435366	8.56789	0.05902	2.58589	0.26957	NA	NA	NA	NA	NA	369.663	9.29016	10.4819	366.979	26.3933	26.8818	NA	NA	NA	83.3124	NA		369.663	9.29016	2.51314	10.4819	2.83618
UK053	UK053_28	NA	1440	29400	95	0.163793	NA	NA	16.8124	2.57539	0.0518	7.03927	NA	NA	0.424817	7.49559	0.05948	2.57539	0.22145	NA	NA	NA	NA	NA	372.462	9.3205	10.5253	359.49	22.6961	23.2434	NA	NA	NA	24.7184	NA		372.462	9.3205	2.5024	10.5253	2.8339
UK053	UK053_164	NA	667	13530	18.6	0.165775	NA	NA	16.8067	2.61085	0.0538	8.18244	NA	NA	0.441368	8.58888	0.0595	2.61085	0.081664	NA	NA	NA	NA	NA	372.584	9.45183	10.6425	371.216	26.7111	27.2031	NA	NA	NA	92.0984	NA		372.584	9.45183	2.53683	10.6425	2.85736
UK053	UK053_17	NA	554	10770	24.9	0.165339	NA	NA	16.1551	2.62352	0.0563	8.63049	NA	NA	0.480508	9.02043	0.0619	2.62352	-0.015431	NA	NA	NA	NA	NA	387.17	9.85847	11.0891	398.421	29.7352	30.2322	NA	NA	NA	47.6454	NA		387.17	9.85847	2.54629	11.0891	2.85572
UK053	UK053_9	NA	4050	80700	67.9	0.176364	NA	NA	15.8053	2.54912	0.054	6.04199	NA	NA	0.471078	6.55771	0.06327	2.54912	0.41096	NA	NA	NA	NA	NA	395.481	9.77828	11.067	391.933	21.3257	21.9951	NA	NA	NA	71.4984	NA		395.481	9.77828	2.4725	11.067	2.79903
UK053	UK053_253	NA	869	16470	27.1	0.182001	NA	NA	15.7011	2.54849	0.0576	7.53192	NA	NA	0.505819	7.95139	0.06369	2.54849	-0.003401	NA	NA	NA	NA	NA	398.027	9.83688	11.1339	415.634	27.1268	27.7089	NA	NA	NA	22.588	NA		398.027	9.83688	2.47141	11.1339	2.78314
UK053	UK053_143	NA	1003	20200	24.4	0.228251	NA	NA	15.5039	2.89204	0.0552	7.40944	NA	NA	0.490908	7.95385	0.0645	2.89204	0.48819	NA	NA	NA	NA	NA	402.934	11.2963	12.4683	405.529	26.5984	27.1688	NA	NA	NA	82.3766	NA		402.934	11.2963	2.80351	12.4683	3.0951
UK053	UK053_138	NA	859	17900	16.99	0.190685	NA	NA	15.3988	2.57782	0.0531	7.57467	NA	NA	0.475454	8.0013	0.06494	2.57782	0.30311	NA	NA	NA	NA	NA	405.598	10.1335	11.4411	394.949	26.186	26.741	NA	NA	NA	39.2784	NA		405.598	10.1335	2.4984	11.4411	2.82356
UK053	UK053_181	NA	1200	25000	6.37	0.178933	NA	NA	15.3139	2.59072	0.0536	7.32999	NA	NA	0.482591	7.77436	0.0653	2.59072	0.14597	NA	NA	NA	NA	NA	407.777	10.2372	11.5458	399.849	25.7007	26.2773	NA	NA	NA	54.4288	NA		407.777	10.2372	2.51048	11.5458	2.83679
UK053	UK053_25	NA	1058	21300	19.8	0.19242	NA	NA	15.024	2.5397	0.055	7.34056	NA	NA	0.504751	7.76749	0.06656	2.5397	-0.040227	NA	NA	NA	NA	NA	415.397	10.2171	11.5731	414.913	26.4619	27.0567	NA	NA	NA	97.3132	NA		415.397	10.2171	2.4596	11.5731	2.78648
UK053	UK053_86	NA	954	19400	64.6	0.185632	NA	NA	14.9499	2.5719	0.0536	7.40042	NA	NA	0.494342	7.8346	0.06689	2.5719	0.11159	NA	NA	NA	NA	NA	417.392	10.3948	11.7419	407.865	26.3221	26.9037	NA	NA	NA	48.1894	NA		417.392	10.3948	2.49041	11.7419	2.82001
UK053	UK053_129	NA	1480	31800	41.7	0.180519	NA	NA	14.8987	2.54625	0.0546	7.00911	NA	NA	0.505296	7.45728	0.06712	2.54625	0.13984	NA	NA	NA	NA	NA	418.781	10.3243	11.6878	415.281	25.4229	26.0422	NA	NA	NA	78.7956	NA		418.781	10.3243	2.46531	11.6878	2.79332
UK053	UK053_126	NA	1238	24460	19	0.222482	NA	NA	14.6199	2.56444	0.0557	7.06662	NA	NA	0.525306	7.51754	0.0684	2.56444	0.088415	NA	NA	NA	NA	NA	426.509	10.5836	11.9627	428.69	26.2941	26.9246	NA	NA	NA	87.3884	NA		426.509	10.5836	2.48145	11.9627	2.80315
UK053	UK053_171	NA	2413	45820	78.9	0.200356	NA	NA	14.5476	2.52809	0.057	6.48085	NA	NA	0.540239	6.95648	0.06874	2.52809	0.10879	NA	NA	NA	NA	NA	428.56	10.4821	11.8853	438.582	24.7801	25.4726	NA	NA	NA	43.9495	NA		428.56	10.4821	2.44589	11.8853	2.7655
UK053	UK053_61	NA	985	20100	48.9	0.239706	NA	NA	14.43	2.63717	0.0573	7.40055	NA	NA	0.547506	7.85639	0.0693	2.63717	0.26221	NA	NA	NA	NA	NA	431.937	11.0177	12.3796	443.362	28.2307	28.8511	NA	NA	NA	40.798	NA		431.937	11.0177	2.55077	12.3796	2.86222
UK053	UK053_155	NA	1992	39600	78.9	0.200254	NA	NA	14.3699	2.53127	0.055	6.63052	NA	NA	0.527729	7.09726	0.06959	2.53127	0.1845	NA	NA	NA	NA	NA	433.685	10.6166	12.0344	430.301	24.8984	25.5672	NA	NA	NA	78.7966	NA		433.685	10.6166	2.448	12.0344	2.77712
UK053	UK053_80	NA	1384	27660	64.9	0.210714	NA	NA	14.2389	2.55326	0.0544	6.97982	NA	NA	0.526772	7.43216	0.07023	2.55326	0.020991	NA	NA	NA	NA	NA	437.541	10.8009	12.22	429.665	26.0429	26.6815	NA	NA	NA	57.2342	NA		437.541	10.8009	2.46854	12.22	2.80007
UK053	UK053_42	NA	775	14570	17.2	0.215	NA	NA	14.1303	2.57454	0.058	7.6775	NA	NA	0.565951	8.09767	0.07077	2.57454	0.1302	NA	NA	NA	NA	NA	440.793	10.9691	12.3879	455.392	29.7245	30.3398	NA	NA	NA	33.8239	NA		440.793	10.9691	2.48849	12.3879	2.80271
UK053	UK053_201	NA	1390	26800	59.8	0.209091	NA	NA	14.1243	2.61268	0.0579	7.14444	NA	NA	0.565214	7.60717	0.0708	2.61268	0.16287	NA	NA	NA	NA	NA	440.974	11.136	12.537	454.915	27.8999	28.5533	NA	NA	NA	32.7236	NA		440.974	11.136	2.52532	12.537	2.83502
UK053	UK053_197	NA	217	4550	9.49	0.195267	NA	NA	14.1044	2.67304	0.053	10.1223	NA	NA	0.518112	10.4693	0.0709	2.67304	0.3266	NA	NA	NA	NA	NA	441.576	11.4083	12.7829	423.889	36.2954	36.7468	NA	NA	NA	29.8071	NA		441.576	11.4083	2.58355	12.7829	2.89457
UK053	UK053_257	NA	912	17860	24.5	0.224977	NA	NA	14.0845	2.5786	0.055	7.44867	NA	NA	0.538421	7.88237	0.071	2.5786	0.022919	NA	NA	NA	NA	NA	442.178	11.0197	12.4409	437.383	28.0185	28.6302	NA	NA	NA	74.7723	NA		442.178	11.0197	2.49215	12.4409	2.81749
UK053	UK053_152	NA	315	6170	18.8	0.192821	NA	NA	13.8889	2.60906	0.0566	8.71384	NA	NA	0.561889	9.09606	0.072	2.60906	0.07415	NA	NA	NA	NA	NA	448.194	11.2964	12.7213	452.755	33.2383	33.7848	NA	NA	NA	79.0609	NA		448.194	11.2964	2.52043	12.7213	2.83592
UK053	UK053_215	NA	819	16100	33.8	0.228378	NA	NA	13.7533	2.5679	0.0539	7.63249	NA	NA	0.540361	8.05289	0.07271	2.5679	0.094001	NA	NA	NA	NA	NA	452.462	11.2204	12.6788	438.663	28.6919	29.2923	NA	NA	NA	35.1824	NA		452.462	11.2204	2.47986	12.6788	2.81161
UK053	UK053_196	NA	647	11890	33.9	0.210167	NA	NA	13.6799	2.57426	0.0602	7.95965	NA	NA	0.606757	8.36557	0.0731	2.57426	-0.068169	NA	NA	NA	NA	NA	454.805	11.3044	12.7669	481.513	32.0874	32.7102	NA	NA	NA	12.7835	NA		454.805	11.3044	2.48555	12.7669	2.78698
UK053	UK053_19	NA	1517	27640	59.2	0.211429	NA	NA	13.4102	2.55205	0.0604	6.95364	NA	NA	0.621015	7.40716	0.07457	2.55205	0.22198	NA	NA	NA	NA	NA	463.63	11.4166	12.918	490.484	28.8213	29.5329	NA	NA	NA	6.28278	NA		463.63	11.4166	2.46244	12.918	2.77569
UK053	UK053_59	NA	1620	31700	29.3	0.2344	NA	NA	13.3511	2.56674	0.0565	6.81153	NA	NA	0.583487	7.27909	0.0749	2.56674	0.10795	NA	NA	NA	NA	NA	465.609	11.5296	13.0295	466.7	27.2413	27.9375	NA	NA	NA	93.8798	NA		465.609	11.5296	2.47624	13.0295	2.79757
UK053	UK053_140	NA	2500	48000	30.4	0.292027	NA	NA	13.2153	2.54388	0.0565	6.43712	NA	NA	0.589486	6.92154	0.07567	2.54388	0.25666	NA	NA	NA	NA	NA	470.225	11.5361	13.0624	470.539	26.0702	26.8061	NA	NA	NA	98.048	NA		470.225	11.5361	2.45331	13.0624	2.77774
UK053	UK053_79	NA	622	11460	38.8	0.228235	NA	NA	12.837	2.57899	0.0581	7.97745	NA	NA	0.624044	8.38397	0.0779	2.57899	0.06444	NA	NA	NA	NA	NA	483.576	12.0151	13.5642	492.379	32.7226	33.355	NA	NA	NA	60.7052	NA		483.576	12.0151	2.48464	13.5642	2.79983
UK053	UK053_217	NA	188	3680	0.43	2.0283	NA	NA	12.7389	2.93404	0.0558	10.2484	NA	NA	0.603956	10.6602	0.0785	2.93404	0.1809	NA	NA	NA	NA	NA	487.163	13.7668	15.1565	479.741	40.7793	41.2688	NA	NA	NA	71.3696	NA		487.163	13.7668	2.82592	15.1565	3.11375
UK053	UK053_234	NA	2160	40100	33.5	0.231034	NA	NA	12.21	2.53763	0.0594	6.59134	NA	NA	0.670767	7.06295	0.0819	2.53763	0.19367	NA	NA	581.788	143.514	145.026	507.454	12.3835	14.0295	521.179	28.7997	29.5809	NA	NA	NA	34.7437	12.7769		507.454	12.3835	2.44032	14.0295	2.75743
UK053	UK053_229	NA	439	7880	8.43	0.2248	NA	NA	11.9474	2.62555	0.0606	8.61952	NA	NA	0.699358	9.01053	0.0837	2.62555	-0.044733	NA	NA	625.066	186.654	187.81	518.17	13.0724	14.7018	538.407	37.6699	38.3011	NA	NA	NA	32.0237	17.1016		518.17	13.0724	2.52281	14.7018	2.82451
UK053	UK053_185	NA	1643	29300	27.6	0.24709	NA	NA	11.6632	2.53528	0.061	6.7897	NA	NA	0.721132	7.2476	0.08574	2.53528	0.22535	NA	NA	639.234	146.438	147.893	530.294	12.9063	14.6248	551.335	30.8431	31.6382	NA	NA	NA	17.3159	17.0424		530.294	12.9063	2.43381	14.6248	2.74935
UK053	UK053_94	NA	345	6230	11.57	0.250976	NA	NA	10.9529	2.63521	0.0589	9.0194	NA	NA	0.741459	9.39649	0.0913	2.63521	0.07066	NA	NA	563.402	197.439	198.558	563.221	14.2122	15.9714	563.257	40.6445	41.2712	NA	NA	NA	99.8639	0.0320959		563.221	14.2122	2.52338	15.9714	2.83572
UK053	UK053_26	NA	508	9270	12.83	0.273561	NA	NA	10.8696	2.6045	0.0591	8.68882	NA	NA	0.749681	9.07078	0.092	2.6045	-0.1674	NA	NA	570.782	189.898	191.056	567.355	14.1452	15.9353	568.039	39.4831	40.1361	NA	NA	NA	97.5227	0.600442		567.355	14.1452	2.49318	15.9353	2.8082
UK053	UK053_43	NA	2358	40090	48	0.285205	NA	NA	10.7066	2.56572	0.0645	6.44343	NA	NA	0.83063	6.93547	0.0934	2.56572	0.0085381	NA	NA	758.068	136.245	137.747	575.614	14.1285	15.9678	613.962	31.9636	32.8624	NA	NA	NA	2.97702	24.0683		575.614	14.1285	2.45451	15.9678	2.74575
UK053	UK053_158	NA	677	11620	28.9	0.271872	NA	NA	10.5374	2.57446	0.0624	7.77257	NA	NA	0.816492	8.18784	0.0949	2.57446	0.21404	NA	NA	687.846	166.43	167.695	584.451	14.3846	16.2453	606.09	37.3864	38.1438	NA	NA	NA	24.7273	15.0316		584.451	14.3846	2.46121	16.2453	2.77307
UK053	UK053_115	NA	382	6970	18	0.290323	NA	NA	10.352	2.6354	0.0586	8.89819	NA	NA	0.780506	9.28026	0.0966	2.6354	0.028824	NA	NA	552.267	195.13	196.266	594.453	14.9656	16.8179	585.772	41.3297	41.983	NA	NA	NA	68.8988	-7.63862		594.453	14.9656	2.51755	16.8179	2.83369
UK053	UK053_207	NA	2150	41600	45.2	0.262791	NA	NA	10.3434	2.53821	0.0603	6.50747	NA	NA	0.803813	6.98496	0.09668	2.53821	-0.016781	NA	NA	614.357	140.905	142.427	594.923	14.4246	16.341	598.977	31.6153	32.4919	NA	NA	NA	81.6824	3.16328		594.923	14.4246	2.42462	16.341	2.74346
UK053	UK053_247	NA	894	15320	68.5	0.277328	NA	NA	10.2249	2.61834	0.0633	7.50923	NA	NA	0.853579	7.95262	0.0978	2.61834	0.30578	NA	NA	718.325	159.95	161.252	601.503	15.037	16.921	626.612	37.2021	38.0005	NA	NA	NA	16.3038	16.2631		601.503	15.037	2.4999	16.921	2.80856
UK053	UK053_230	NA	249	4240	18	0.286169	NA	NA	10.2145	2.74811	0.0621	9.70512	NA	NA	0.838254	10.0867	0.0979	2.74811	0.20839	NA	NA	677.554	208.576	209.598	602.09	15.7969	17.603	618.182	46.7364	47.3627	NA	NA	NA	48.8065	11.1377		602.09	15.7969	2.62368	17.603	2.92029
UK053	UK053_204	NA	875	15600	16.2	0.281739	NA	NA	10.1833	2.5596	0.062	7.56505	NA	NA	0.839469	7.98634	0.0982	2.5596	-0.070014	NA	NA	674.109	162.324	163.626	603.852	14.7544	16.6839	618.852	37.0239	37.8119	NA	NA	NA	46.437	10.4222		603.852	14.7544	2.44338	16.6839	2.75255
UK053	UK053_130	NA	1092	19350	49.1	0.283815	NA	NA	9.8912	2.56582	0.06	7.3718	NA	NA	0.83638	7.80557	0.1011	2.56582	0.21734	NA	NA	603.575	160.022	161.374	620.852	15.1869	17.1639	617.146	36.1126	36.9167	NA	NA	NA	83.6592	-2.86253		620.852	15.1869	2.44614	17.1639	2.76601
UK053	UK053_72	NA	1950	35500	47.9	0.278488	NA	NA	9.86193	2.56544	0.0605	6.70473	NA	NA	0.845852	7.17878	0.1014	2.56544	0.28601	NA	NA	621.505	145.024	146.502	622.608	15.2256	17.2082	622.37	33.4145	34.2923	NA	NA	NA	98.831	-0.177584		622.608	15.2256	2.44545	17.2082	2.76397
UK053	UK053_92	NA	1129	20600	47.3	0.290541	NA	NA	9.78474	2.55514	0.0596	7.27814	NA	NA	0.839844	7.71363	0.1022	2.55514	0.18007	NA	NA	589.083	158.362	159.734	627.289	15.273	17.2769	619.059	35.7673	36.5826	NA	NA	NA	64.8832	-6.48557		627.289	15.273	2.43477	17.2769	2.75799
UK053	UK053_24	NA	934	16530	46.7	0.317255	NA	NA	9.53289	2.57077	0.064	7.50561	NA	NA	0.925671	7.93366	0.1049	2.57077	0.16372	NA	NA	741.63	159.265	160.563	643.061	15.7338	17.7746	665.355	38.7426	39.5781	NA	NA	NA	26.1329	13.2909		643.061	15.7338	2.44671	17.7746	2.75531
UK053	UK053_205	NA	675	11840	21.5	0.298611	NA	NA	9.53289	2.59179	0.0616	7.97579	NA	NA	0.890958	8.38633	0.1049	2.59179	0.32363	NA	NA	660.251	171.595	172.835	643.061	15.8625	17.8886	646.884	40.1424	40.9181	NA	NA	NA	84.1099	2.60354		643.061	15.8625	2.46672	17.8886	2.78128
UK053	UK053_29	NA	5350	94400	200	0.30581	NA	NA	9.35454	2.59955	0.0621	5.78146	NA	NA	0.915315	6.339	0.1069	2.59955	0.59743	NA	NA	677.554	123.811	125.502	654.719	16.184	18.2396	659.879	30.7691	31.8019	NA	NA	NA	67.7736	3.37022		654.719	16.184	2.47191	18.2396	2.78718
UK053	UK053_191	NA	1140	19800	71.8	0.299167	NA	NA	9.32836	2.62289	0.0626	7.39721	NA	NA	0.925274	7.84845	0.1072	2.62289	0.2172	NA	NA	694.67	158.162	159.488	656.466	16.3707	18.4152	665.145	38.3176	39.1617	NA	NA	NA	65.1053	5.4996		656.466	16.3707	2.49376	18.4152	2.80192
UK053	UK053_188	NA	1550	26620	21.06	0.334817	NA	NA	8.74126	2.5374	0.0641	6.92425	NA	NA	1.01108	7.37453	0.1144	2.5374	0.27351	NA	NA	744.932	146.779	148.182	698.251	16.7916	19.0239	709.419	37.6634	38.6018	NA	NA	NA	54.5603	6.26649		698.251	16.7916	2.40481	19.0239	2.72111
UK053	UK053_189	NA	1278	20010	37.1	0.340055	NA	NA	8.4246	2.5812	0.0688	7.16212	NA	NA	1.12601	7.61305	0.1187	2.5812	0.21746	NA	NA	892.749	148.305	149.63	723.077	17.6554	19.928	765.847	40.9638	41.9224	NA	NA	NA	3.98942	19.0056		723.077	17.6554	2.44171	19.928	2.74238
UK053	UK053_210	NA	2070	31490	13.92	0.410619	NA	NA	6.57462	2.58278	0.0716	6.52486	NA	NA	1.50156	7.01745	0.1521	2.58278	0.44651	NA	NA	974.592	133.337	134.77	912.724	21.9809	24.8071	931.021	42.7955	43.9719	NA	NA	NA	34.4353	6.3481		912.724	21.9809	2.40828	24.8071	2.7159
UK053	UK053_226	NA	4870	75300	28.3	0.419259	NA	NA	6.54022	2.54408	0.07	5.84984	NA	NA	1.47573	6.3791	0.1529	2.54408	0.39434	NA	NA	928.353	120.345	121.95	917.199	21.7503	24.6275	920.48	38.628	39.9092	NA	NA	NA	85.5832	1.20149		917.199	21.7503	2.37138	24.6275	2.68404
UK053	UK053_242	NA	1435	21840	25.9	0.445017	NA	NA	6.43915	2.55974	0.0713	7.02347	NA	NA	1.52673	7.47539	0.1553	2.55974	0.20388	NA	NA	966.027	143.769	145.104	930.605	22.1816	25.0821	941.185	45.8947	47.0085	NA	NA	NA	65.1729	3.66678		930.605	22.1816	2.38357	25.0821	2.69133
UK053	UK053_255	NA	1508	21980	33.1	0.452186	NA	NA	6.28536	2.60497	0.0741	6.94393	NA	NA	1.62551	7.41647	0.1591	2.60497	0.18676	NA	NA	1044.19	140.446	141.78	951.773	23.05	25.9662	980.124	46.6561	47.8063	NA	NA	NA	24.2279	8.85076		951.773	23.05	2.4218	25.9662	2.71711
UK053	UK053_12	NA	2060	31200	38.2	0.448884	NA	NA	6.25	2.5454	0.0709	6.64159	NA	NA	1.56411	7.11265	0.16	2.5454	0.18802	NA	NA	954.532	136.154	137.567	956.777	22.6328	25.6238	956.097	44.0824	45.2624	NA	NA	NA	97.6186	-0.235205		956.777	22.6328	2.36552	25.6238	2.67843
UK053	UK053_133	NA	514	8310	10.87	0.452163	NA	NA	6.2383	2.66416	0.0672	8.33438	NA	NA	1.48527	8.74984	0.1603	2.66416	-0.083504	NA	NA	843.978	174.092	175.245	958.444	23.7271	26.6041	924.384	53.1444	54.0892	NA	NA	NA	25.0546	-13.5626		958.444	23.7271	2.47558	26.6041	2.79479
UK053	UK053_7	NA	1960	30300	116	0.47541	NA	NA	6.23441	2.69385	0.0704	6.71882	NA	NA	1.55696	7.23874	0.1604	2.69385	0.41316	NA	NA	940.042	138.055	139.455	958.999	24.0044	26.8546	953.262	44.7846	45.9426	NA	NA	NA	77.9739	-2.0166		958.999	24.0044	2.50306	26.8546	2.80161
UK053	UK053_69	NA	1670	24500	67.8	0.476793	NA	NA	6.23053	2.56809	0.073	6.86614	NA	NA	1.61547	7.33068	0.1605	2.56809	0.19968	NA	NA	1013.95	139.503	140.858	959.555	22.896	25.8717	976.234	46.0067	47.1671	NA	NA	NA	48.1362	5.36493		959.555	22.896	2.38611	25.8717	2.68978
UK053	UK053_241	NA	896	14240	19.9	0.464953	NA	NA	6.19195	2.58725	0.0707	7.61349	NA	NA	1.57432	8.04109	0.1615	2.58725	-0.11686	NA	NA	948.752	156.338	157.576	965.107	23.1906	26.1626	960.132	49.9719	51.0219	NA	NA	NA	86.2295	-1.72386		965.107	23.1906	2.40291	26.1626	2.71371
UK053	UK053_195	NA	4500	66700	32	0.450704	NA	NA	6.16143	2.55483	0.0735	5.87674	NA	NA	1.64478	6.40806	0.1623	2.55483	0.40418	NA	NA	1027.77	119.068	120.642	969.546	22.9975	26.0157	987.548	40.486	41.817	NA	NA	NA	34.1742	5.66521		969.546	22.9975	2.37199	26.0157	2.67824
UK053	UK053_236	NA	6530	96800	56	0.465503	NA	NA	6.09756	2.55937	0.074	5.63762	NA	NA	1.67331	6.19137	0.164	2.55937	0.36247	NA	NA	1041.47	113.97	115.605	978.968	23.2458	26.2863	998.444	39.3697	40.7545	NA	NA	NA	30.5616	6.00114		978.968	23.2458	2.37452	26.2863	2.67767
UK053	UK053_77	NA	213	2860	0.52	0.465116	NA	NA	6.06428	2.8179	0.0799	10.2295	NA	NA	1.81664	10.6106	0.1649	2.8179	0.090477	NA	NA	1194.52	202.946	203.842	983.95	25.7145	28.5177	1051.47	69.5961	70.441	NA	NA	NA	6.75033	17.628		983.95	25.7145	2.61339	28.5177	2.88107
UK053	UK053_186	NA	1660	25390	33.3	0.444	NA	NA	6.05327	2.63726	0.072	7.09897	NA	NA	1.64	7.57301	0.1652	2.63726	0.22165	NA	NA	985.941	144.879	146.196	985.61	24.1037	27.083	985.712	47.8034	48.9343	NA	NA	NA	99.663	0.0335275		985.61	24.1037	2.44556	27.083	2.7478
UK053	UK053_54	NA	5120	80000	62.7	0.483423	NA	NA	6.035	2.55266	0.0716	5.80807	NA	NA	1.63582	6.34427	0.1657	2.55266	0.2954	NA	NA	974.592	118.631	120.237	988.376	23.391	26.4656	984.105	39.9997	41.3408	NA	NA	NA	83.0321	-1.41424		988.376	23.391	2.36661	26.4656	2.67968
UK053	UK053_20	NA	1232	18410	23.6	0.482618	NA	NA	6.0241	2.58955	0.0737	7.18724	NA	NA	1.68685	7.63952	0.166	2.58955	0.24184	NA	NA	1033.26	145.635	146.928	990.034	23.7659	26.8065	1003.57	48.7374	49.8706	NA	NA	NA	58.0536	4.18382		990.034	23.7659	2.40051	26.8065	2.70332
[truncated: 974 more rows]

## Sheet: Table of Acquisition Parameters
Table A-1	Data acquisition and laser settings
[truncated: 20 more rows]
